# Supplementary material for: Growth of continental crust and subduction of lithosphere in the Hadean revealed by geochemistry and geodynamics.
Source: Research Square preprint supplement (doi:10.21203/rs.3.rs-3601806/v1), 2024-11-01
Supplement: Supplementary file 1 [file 45d1743baecac506e8718560.xlsx]

## Sheet: Table 1
Table 1. Reproducibility of reference materials (Extended Data Fig 5).
Sr-Rb isotope analysis: Neptune XT	Reference Glass	Method	Day / Sequence	Integration time (second)	88Sr (V)	87Sr/86Sr	2SE	87Rb/86Sr	2SE	LASIS: Laser Ablation Single Stream			Trace elements analysis Agilent 8900	Sample	Day / Sequence	Type	Ce/Pb	2SE	Nb/U	2SE		Uncertainty in these values include an excess variance (inter-sessions variance) of 3.1%, 2.5%, 2.6% and 10% for Ce, Pb, Nb and U respectively
	GOR128-G	LASIS	2022.02.15 / Seq-1	31	0.077	0.70687	0.00069	0.03759	0.00018	LASS: Laser Ablation Split stream				GOR128-G	2022.02.21 / Seq-1	LASIS	1.28	0.23	9.97	4.23		Excess variance was added quadratically to the uncertainty calculated by LADR software (which already includes measurement uncertainty and within run variance)
	GOR128-G	LASIS	2022.02.15 / Seq-1	31	0.075	0.70675	0.00053	0.03761	0.0002					GOR128-G	2022.02.21 / Seq-1	LASIS	1.26	0.25	5.5	1.93		LASIS: Laser Ablation Single Stream
	GOR128-G	LASIS	2022.02.15 / Seq-1	31	0.078	0.70701	0.00075	0.03764	0.00022					GOR128-G	2022.02.21 / Seq-1	LASIS	1.26	0.22	7.07	2.74		LASS: Laser Ablation Split stream
	GOR128-G	LASIS	2022.02.15 / Seq-1	31	0.073	0.70707	0.00099	0.03755	0.00018					GOR128-G	2022.02.21 / Seq-1	LASIS	1.56	0.26	9.83	3.91
	GOR128-G	LASIS	2022.02.15 / Seq-1	31	0.077	0.70681	0.00063	0.03765	0.00021					GOR128-G	2022.02.21 / Seq-1	LASIS	1.21	0.22	8.46	3.32
	GOR128-G	LASIS	2022.02.15 / Seq-1	31	0.077	0.70711	0.00072	0.03759	0.00019					GOR128-G	2022.02.21 / Seq-1	LASIS	1.17	0.21	10.07	3.86
	GOR128-G	LASIS	2022.02.15 / Seq-2	18.1	0.087	0.7068	0.00062	0.03759	0.00021					GOR128-G	2022.02.21 / Seq-1	LASIS	1.31	0.23	7.27	2.81
	GOR128-G	LASIS	2022.02.15 / Seq-2	21.9	0.082	0.70675	0.00057	0.03762	0.00025					GOR128-G	2022.02.21 / Seq-1	LASIS	1.29	0.22	5.5	2.15
	GOR128-G	LASIS	2022.02.15 / Seq-2	25.4	0.082	0.70689	0.00078	0.03766	0.00026					GOR128-G	2022.02.21 / Seq-1	LASIS	1.22	0.23	6.05	2.05
	GOR128-G	LASIS	2022.02.15 / Seq-2	15.8	0.066	0.70617	0.0008	0.03754	0.00018					GOR128-G	2022.02.21 / Seq-1	LASIS	1.3	0.23	8.43	3.42
	GOR128-G	LASIS	2022.02.15 / Seq-2	31	0.077	0.70692	0.00063	0.03765	0.00021					GOR128-G	2022.02.21 / Seq-1	LASIS	1.34	0.24	10.06	4.24
	GOR128-G	LASIS	2022.02.15 / Seq-2	32.1	0.074	0.70671	0.00086	0.03759	0.00015					GOR128-G	2022.02.21 / Seq-1	LASIS	1.13	0.22	7.99	3.14
	GOR128-G	LASIS	2022.02.15 / Seq-3	16.6	0.08	0.70644	0.00076	0.03764	0.00048					GOR128-G	2022.02.21 / Seq-1	LASIS	1.26	0.23	8.28	3.26
	GOR128-G	LASIS	2022.02.15 / Seq-3	30.9	0.072	0.70651	0.00063	0.03756	0.00024					GOR128-G	2022.02.21 / Seq-1	LASIS	1.39	0.24	10.11	4.13
	GOR128-G	LASIS	2022.02.15 / Seq-3	31	0.073	0.70701	0.00065	0.03764	0.0002					GOR128-G	2022.02.21 / Seq-1	LASIS	1.34	0.24	9.53	3.72
	GOR128-G	LASIS	2022.02.15 / Seq-3	31	0.075	0.7065	0.00069	0.03751	0.00036					GOR128-G	2022.02.21 / Seq-1	LASIS	1.28	0.23	7.64	3.01
	GOR128-G	LASIS	2022.02.15 / Seq-3	21.1	0.079	0.70663	0.00076	0.0376	0.00017					GOR128-G	2022.02.21 / Seq-1	LASIS	1.32	0.23	7.49	2.93
	GOR128-G	LASIS	2022.02.15 / Seq-3	19.3	0.083	0.70633	0.00058	0.03761	0.00021					GOR128-G	2022.06.30 / Seq-2	LASIS	1.17	0.18	8.81	3.2
	GOR128-G	LASIS	2022.02.15 / Seq-3	21.6	0.083	0.70677	0.00069	0.03759	0.00029					GOR128-G	2022.06.30 / Seq-2	LASIS	1.45	0.27	9.44	3.79
	GOR128-G	LASIS	2022.02.15 / Seq-4	29.1	0.073	0.70717	0.00053	0.03763	0.00021					GOR128-G	2022.06.30 / Seq-2	LASIS	1.2	0.19	8.32	3.06
	GOR128-G	LASIS	2022.02.15 / Seq-4	12.9	0.088	0.70657	0.00074	0.03724	0.00071					GOR128-G	2022.06.30 / Seq-2	LASIS	1.52	0.22	8.34	2.96
	GOR128-G	LASIS	2022.02.15 / Seq-4	31	0.075	0.70674	0.00072	0.03755	0.00033					GOR128-G	2022.06.30 / Seq-2	LASIS	1.29	0.21	8.54	2.9
	GOR128-G	LASIS	2022.02.15 / Seq-4	31	0.076	0.70689	0.00046	0.03762	0.00021					GOR128-G	2022.06.30 / Seq-2	LASIS	1.23	0.2	9.25	3.42
	GOR128-G	LASIS	2022.02.17 / Seq-10	31	0.045	0.7062	0.00099	0.03785	0.00077					GOR128-G	2022.06.30 / Seq-2	LASIS	1.13	0.2	7.19	2.66
	GOR128-G	LASIS	2022.02.17 / Seq-10	31	0.045	0.70709	0.00088	0.03734	0.00059					GOR128-G	2022.06.30 / Seq-2	LASIS	1.35	0.22	9	3.07
	GOR128-G	LASIS	2022.02.17 / Seq-10	31	0.046	0.70692	0.00075	0.03772	0.00064					GOR128-G	2022.07.07 / Seq-2	LASIS	1.37	0.2	7.26	2.11
	GOR128-G	LASIS	2022.02.17 / Seq-10	31	0.05	0.70659	0.00095	0.0376	0.00018					GOR128-G	2022.07.07 / Seq-2	LASIS	1.3	0.19	7.49	2.36
	GOR128-G	LASIS	2022.02.17 / Seq-10	31	0.05	0.70689	0.00093	0.03761	0.00023					GOR128-G	2022.07.07 / Seq-2	LASIS	1.4	0.18	5.61	1.65
	GOR128-G	LASIS	2022.02.17 / Seq-10	31	0.049	0.70627	0.00101	0.03759	0.00026					GOR128-G	2022.07.07 / Seq-2	LASIS	1.3	0.19	7.89	2.63
	GOR128-G	LASIS	2022.02.17 / Seq-10	30.9	0.049	0.70692	0.00099	0.0376	0.00018					GOR128-G	2022.07.07 / Seq-2	LASIS	1.21	0.18	7.85	2.44
	GOR128-G	LASIS	2022.02.17 / Seq-10	31	0.049	0.70685	0.0008	0.03765	0.00026					GOR128-G	2022.07.07 / Seq-2	LASIS	1.2	0.17	10.39	3.31
	GOR128-G	LASIS	2022.02.17 / Seq-10	31	0.05	0.70663	0.00087	0.03765	0.00027					GOR128-G	2022.07.07 / Seq-2	LASIS	1.27	0.18	7.39	2.26
	GOR128-G	LASIS	2022.02.17 / Seq-10	19	0.056	0.70602	0.00099	0.03719	0.00075					GOR128-G	2022.07.07 / Seq-2	LASIS	1.35	0.19	7.38	2.4
	GOR128-G	LASIS	2022.02.17 / Seq-10	27.3	0.051	0.70612	0.001	0.0377	0.00027					GOR128-G	2022.07.07 / Seq-2	LASIS	1.32	0.22	9.4	3
	GOR128-G	LASIS	2022.02.17 / Seq-10	31	0.049	0.7064	0.00094	0.03758	0.00044					GOR128-G	2022.07.07 / Seq-2	LASIS	1.4	0.2	8.66	2.68
	GOR128-G	LASIS	2022.06.29 / Seq-2	35.2	0.059	0.70736	0.00059	0.03767	0.00044					GOR128-G	2022.07.08 / Seq-2	LASIS	1.22	0.18	9.09	2.78
	GOR128-G	LASIS	2022.06.29 / Seq-2	30.4	0.062	0.70747	0.00065	0.0373	0.0006					GOR128-G	2022.07.08 / Seq-2	LASIS	1.16	0.19	8.51	2.57
	GOR128-G	LASIS	2022.06.29 / Seq-2	36	0.061	0.70649	0.0006	0.03739	0.00034					GOR128-G	2022.07.08 / Seq-2	LASIS	1.34	0.21	9.56	3.15
	GOR128-G	LASIS	2022.06.29 / Seq-2	25.8	0.055	0.70678	0.00088	0.03768	0.00017					GOR128-G	2022.07.08 / Seq-2	LASIS	1.43	0.25	7.02	2.45
	GOR128-G	LASIS	2022.06.29 / Seq-2	36	0.063	0.70634	0.00074	0.0377	0.00026					GOR128-G	2022.07.08 / Seq-2	LASIS	1.24	0.17	5.65	1.53
	GOR128-G	LASIS	2022.06.29 / Seq-2	36	0.062	0.70676	0.00067	0.03751	0.00022					GOR128-G	2022.07.08 / Seq-2	LASIS	1.25	0.2	9.21	2.72
	GOR128-G	LASIS	2022.06.29 / Seq-2	36	0.062	0.7063	0.00077	0.03763	0.00016					GOR128-G	2022.07.08 / Seq-2	LASIS	1.2	0.15	8.43	2.49
	GOR128-G	LASIS	2022.06.29 / Seq-2	33.6	0.061	0.70705	0.00062	0.03747	0.00026					GOR128-G	2022.07.08 / Seq-2	LASIS	1.33	0.17	8.79	2.56
	GOR128-G	LASIS	2022.06.29 / Seq-2	34.1	0.061	0.7066	0.00059	0.03763	0.00022					GOR128-G	2022.05.06 / Seq-3a	LASS	1.35	0.27	7.81	3.98
	GOR128-G	LASIS	2022.06.29 / Seq-2	31.7	0.057	0.70711	0.00071	0.0376	0.00013					GOR128-G	2022.05.06 / Seq-3a	LASS	1.56	0.27	8.02	4.27
	GOR128-G	LASIS	2022.06.29 / Seq-3	35.9	0.056	0.70694	0.00071	0.03761	0.00015					GOR128-G	2022.05.06 / Seq-3a	LASS	1.41	0.29	7.37	3.57
	GOR128-G	LASIS	2022.06.29 / Seq-3	36	0.057	0.70728	0.00063	0.03756	0.00024					GOR128-G	2022.05.06 / Seq-3a	LASS	1.3	0.24	6.99	3.69
	GOR128-G	LASIS	2022.06.29 / Seq-3	36	0.058	0.70694	0.00068	0.03761	0.00019					GOR128-G	2022.05.06 / Seq-3a	LASS	1.37	0.27	5.68	2.6
	GOR128-G	LASIS	2022.06.29 / Seq-3	35.9	0.058	0.70688	0.0006	0.0376	0.00015					GOR128-G	2022.05.06 / Seq-3a	LASS	1.42	0.28	8.46	4.45
	GOR128-G	LASIS	2022.06.29 / Seq-3	19.2	0.069	0.70689	0.00085	0.03757	0.00037					GOR128-G	2022.05.06 / Seq-3a	LASS	1.22	0.26	7.12	3.67
	GOR128-G	LASIS	2022.06.29 / Seq-3	36	0.059	0.7072	0.00072	0.03761	0.00019					GOR128-G	2022.05.06 / Seq-3a	LASS	1.2	0.23	6.57	3.02
	GOR128-G	LASIS	2022.06.29 / Seq-3	36	0.059	0.70698	0.00073	0.03759	0.00018					GOR128-G	2022.05.06 / Seq-3b	LASS			8.92	5.06
	GOR128-G	LASIS	2022.06.29 / Seq-3	36	0.059	0.70704	0.00068	0.03761	0.00019					GOR128-G	2022.05.06 / Seq-3b	LASS	1.23	0.25	7.77	3.99
	GOR128-G	LASIS	2022.06.29 / Seq-3	36	0.058	0.70732	0.00076	0.03758	0.00015					GOR128-G	2022.05.06 / Seq-3b	LASS	1.12	0.23	7.14	3.63
	GOR128-G	LASIS	2022.06.29 / Seq-3	17.7	0.07	0.7072	0.00081	0.03766	0.00027					GOR128-G	2022.05.06 / Seq-3b	LASS	1.46	0.36	9.23	5.08
	GOR128-G	LASIS	2022.06.29 / Seq-4	36	0.056	0.70705	0.00063	0.03761	0.00017					GOR128-G	2022.05.06 / Seq-3b	LASS	1.26	0.24	8.03	4.29
	GOR128-G	LASIS	2022.06.29 / Seq-4	36	0.057	0.7073	0.00071	0.03751	0.00027					GOR128-G	2022.05.06 / Seq-3b	LASS	1.62	0.3	6.48	3.65
	GOR128-G	LASIS	2022.06.29 / Seq-4	34.8	0.057	0.70654	0.0008	0.03761	0.00018					GOR128-G	2022.05.06 / Seq-3b	LASS	1.47	0.29	8.22	5.14
	GOR128-G	LASIS	2022.06.29 / Seq-4	36	0.057	0.70667	0.00069	0.03763	0.00018					GOR128-G	2022.09.09 / Seq-2	LASS	1.29	0.14	9.27	2.3
	GOR128-G	LASIS	2022.06.29 / Seq-4	36	0.056	0.7063	0.00058	0.03758	0.00015					GOR128-G	2022.09.09 / Seq-2	LASS	1.41	0.15	8.16	2
	GOR128-G	LASIS	2022.06.29 / Seq-4	36	0.058	0.70693	0.00067	0.0376	0.00018					GOR128-G	2022.09.09 / Seq-2	LASS	1.25	0.14	6.73	1.69
	GOR128-G	LASIS	2022.06.29 / Seq-4	36	0.058	0.70668	0.00068	0.0376	0.00019					GOR128-G	2022.09.09 / Seq-2	LASS	1.34	0.16	9.82	2.45
	GOR128-G	LASS	2022.05.06 / Seq-3a	22.6	0.068	0.70647	0.00086	0.03878	0.00077					GOR128-G	2022.09.09 / Seq-2	LASS	1.3	0.14	7.11	1.75
	GOR128-G	LASS	2022.05.06 / Seq-3a	12.3	0.085	0.7069	0.00063	0.03687	0.00082					GOR128-G	2022.09.09 / Seq-2	LASS	1.24	0.15	6.71	1.63
	GOR128-G	LASS	2022.05.06 / Seq-3a	28.1	0.066	0.70684	0.00088	0.03814	0.00067					GOR128-G	2022.09.09 / Seq-2	LASS	1.38	0.17	7.29	1.73
	GOR128-G	LASS	2022.05.06 / Seq-3a	22	0.068	0.70631	0.00081	0.03831	0.00056					GOR128-G	2022.09.09 / Seq-2	LASS	1.33	0.14	8.97	2.08
	GOR128-G	LASS	2022.05.06 / Seq-3a	27.7	0.074	0.7079	0.00098	0.0378	0.00089					GOR128-G	2022.09.09 / Seq-2	LASS	1.3	0.14	8.5	2.04
	GOR128-G	LASS	2022.05.06 / Seq-3a	27.3	0.075	0.706	0.00112	0.03695	0.00088					GOR128-G	2022.09.09 / Seq-2	LASS	1.31	0.15	8.28	2.21
	GOR128-G	LASS	2022.05.06 / Seq-3a	27	0.071	0.70584	0.00091	0.03733	0.00047					GOR128-G	2022.09.09 / Seq-3	LASS	1.35	0.19	7.45	1.83
	GOR128-G	LASS	2022.05.06 / Seq-3a	18.3	0.077	0.70609	0.00075	0.03751	0.00038					GOR128-G	2022.09.09 / Seq-3	LASS	1.35	0.16	8.54	2.08
	GOR128-G	LASS	2022.05.06 / Seq-3a	23.4	0.068	0.70647	0.00086	0.03878	0.00077					GOR128-G	2022.09.09 / Seq-3	LASS	1.39	0.16	6.64	1.6
	GOR128-G	LASS	2022.05.06 / Seq-3a	13.5	0.085	0.70698	0.00073	0.03675	0.00094					GOR128-G	2022.09.09 / Seq-3	LASS	1.4	0.15	8.04	1.94
	GOR128-G	LASS	2022.05.06 / Seq-3a	14.4	0.083	0.7074	0.0009	0.03678	0.00072					GOR128-G	2022.09.09 / Seq-3	LASS	1.26	0.14	8.26	2.03
	GOR128-G	LASS	2022.05.06 / Seq-3a	26	0.075	0.70654	0.00075	0.03765	0.00078					GOR128-G	2022.09.09 / Seq-3	LASS	1.31	0.14	8.51	2.05
	GOR128-G	LASS	2022.05.06 / Seq-3a	23.6	0.072	0.70761	0.00081	0.03818	0.00069					GOR128-G	2022.09.09 / Seq-3	LASS	1.32	0.14	7.18	1.71
	GOR128-G	LASS	2022.05.06 / Seq-3a	16.2	0.079	0.70576	0.00106	0.03676	0.0007					GOR128-G	2022.09.09 / Seq-3	LASS	1.29	0.14	8.23	1.93
	GOR128-G	LASS	2022.05.06 / Seq-3a	17.8	0.075	0.70589	0.00095	0.03699	0.00045					GOR128-G	2022.09.09 / Seq-3	LASS	1.37	0.15	7.01	1.7
	GOR128-G	LASS	2022.05.06 / Seq-3a	16.9	0.076	0.70589	0.00068	0.03761	0.00035					GOR128-G	2022.09.09 / Seq-3	LASS	1.32	0.14	8.13	1.92
	GOR128-G	LASS	2022.05.06 / Seq-3b	23	0.07	0.70729	0.00088	0.03761	0.00053					GOR128-G	2022.11.22 / Seq-1	LASS	1.18	0.17	9.25	3.61
	GOR128-G	LASS	2022.05.06 / Seq-3b	26	0.068	0.70699	0.00063	0.03737	0.00056					GOR128-G	2022.11.22 / Seq-1	LASS	1.23	0.18	8	2.65
	GOR128-G	LASS	2022.05.06 / Seq-3b	18.9	0.068	0.70674	0.0007	0.03757	0.00043					GOR128-G	2022.11.22 / Seq-1	LASS	1.21	0.17	8.07	2.65
	GOR128-G	LASS	2022.05.06 / Seq-3b	16.1	0.062	0.70698	0.00089	0.0377	0.00026					GOR128-G	2022.11.22 / Seq-1	LASS	1.39	0.2	8.17	2.71
	GOR128-G	LASS	2022.05.06 / Seq-3b	12.5	0.075	0.70639	0.00064	0.03728	0.0002					GOR128-G	2022.11.22 / Seq-1	LASS	1.17	0.18	7.4	2.69
	GOR128-G	LASS	2022.05.06 / Seq-3b	26	0.07	0.70728	0.00056	0.03732	0.0004					GOR128-G	2022.11.22 / Seq-1	LASS	1.13	0.17	7.22	2.48
	GOR128-G	LASS	2022.05.06 / Seq-3b	23.8	0.068	0.70751	0.0008	0.03776	0.00045					GOR128-G	2022.11.22 / Seq-1	LASS	1.28	0.19	7.16	2.35
	GOR128-G	LASS	2022.05.06 / Seq-3b	18.9	0.077	0.70662	0.00045	0.03736	0.00057					GOR128-G	2022.11.22 / Seq-1	LASS	1.18	0.16	9.53	3.42
	GOR128-G	LASS	2022.09.09 / Seq-2	31.8	0.061	0.70654	0.00109	0.03763	0.00046					GOR128-G	2022.11.22 / Seq-1	LASS	1.19	0.19	9.78	3.5
	GOR128-G	LASS	2022.09.09 / Seq-2	33	0.063	0.70646	0.00121	0.03749	0.0009					GOR128-G	2023.01.27 / Seq-3	LASS	1.43	0.14	7.72	1.53
	GOR128-G	LASS	2022.09.09 / Seq-2	36	0.061	0.70645	0.00059	0.0376	0.00023					GOR128-G	2023.01.27 / Seq-3	LASS	1.41	0.12	6.4	1.26
	GOR128-G	LASS	2022.09.09 / Seq-2	26	0.053	0.70679	0.00095	0.0376	0.00037					GOR128-G	2023.01.27 / Seq-3	LASS	1.45	0.13	8.02	1.7
	GOR128-G	LASS	2022.09.09 / Seq-2	36	0.062	0.70651	0.00068	0.0376	0.0002					GOR128-G	2023.01.27 / Seq-3	LASS	1.41	0.14	8.74	1.86
	GOR128-G	LASS	2022.09.09 / Seq-2	36	0.062	0.70575	0.00072	0.0376	0.00026					GOR128-G	2023.01.27 / Seq-3	LASS	1.41	0.12	7.12	1.43
	GOR128-G	LASS	2022.09.09 / Seq-2	29.7	0.066	0.70664	0.00069	0.0376	0.00031					GOR128-G	2023.01.27 / Seq-3	LASS	1.35	0.12	8.03	1.73
	GOR128-G	LASS	2022.09.09 / Seq-2	36	0.063	0.70635	0.00076	0.03759	0.00058					GOR128-G	2023.01.27 / Seq-3	LASS	1.32	0.12	8.32	1.7
	GOR128-G	LASS	2022.09.09 / Seq-2	36	0.061	0.70652	0.00092	0.03764	0.00034					GOR128-G	2023.01.27 / Seq-3	LASS	1.34	0.12	7.21	1.45
	GOR128-G	LASS	2022.09.09 / Seq-2	36	0.062	0.70668	0.00062	0.03754	0.00051					GOR128-G	2023.01.27 / Seq-3	LASS	1.32	0.13	6.49	1.31
	GOR128-G	LASS	2022.09.09 / Seq-3	36	0.061	0.7062	0.00066	0.03766	0.00041					GOR128-G	2023.01.27 / Seq-3	LASS	1.4	0.13	7.3	1.46
	GOR128-G	LASS	2022.09.09 / Seq-3	36	0.063	0.70649	0.00096	0.03751	0.00048					GOR128-G	2023.01.27 / Seq-4	LASS	1.45	0.13	8.56	1.89
	GOR128-G	LASS	2022.09.09 / Seq-3	35.9	0.063	0.70612	0.00074	0.03761	0.00031					GOR128-G	2023.01.27 / Seq-4	LASS	1.4	0.14	6.84	1.38
	GOR128-G	LASS	2022.09.09 / Seq-3	36	0.064	0.70627	0.00097	0.0376	0.00021					GOR128-G	2023.01.27 / Seq-4	LASS	1.37	0.14	7.57	1.59
	GOR128-G	LASS	2022.09.09 / Seq-3	36	0.064	0.70693	0.0007	0.03761	0.00031					GOR128-G	2023.01.27 / Seq-4	LASS	1.38	0.12	6.77	1.35
	GOR128-G	LASS	2022.09.09 / Seq-3	36	0.064	0.70663	0.00106	0.03753	0.00042					GOR128-G	2023.01.27 / Seq-4	LASS	1.31	0.12	7.11	1.39
	GOR128-G	LASS	2022.09.09 / Seq-3	36	0.063	0.70587	0.00071	0.03766	0.00029					GOR128-G	2023.01.27 / Seq-4	LASS	1.39	0.14	7.81	1.57
	GOR128-G	LASS	2022.09.09 / Seq-3	36	0.064	0.70635	0.00078	0.03755	0.0003					GOR128-G	2023.01.27 / Seq-4	LASS	1.51	0.19	7.82	1.61
	GOR128-G	LASS	2022.09.09 / Seq-3	36	0.065	0.70562	0.00078	0.03765	0.00033					GOR128-G	2023.01.27 / Seq-4	LASS	1.39	0.15	7.02	1.58
	GOR128-G	LASS	2022.09.09 / Seq-3	36	0.064	0.70642	0.00079	0.03756	0.00032					GOR128-G	2023.01.27 / Seq-4	LASS	1.39	0.15	8.24	1.75
	GOR128-G	LASS	2023.01.27 / Seq-3	35	0.061	0.70686	0.00071	0.03761	0.00018					GOR128-G	2023.01.27 / Seq-4	LASS	1.47	0.15	7.5	1.68
	GOR128-G	LASS	2023.01.27 / Seq-3	32.2	0.063	0.70677	0.00073	0.03758	0.00025					GOR128-G	2023.11.08 / Seq-2	LASS	1.4515	0.15	8.20038	1.74
	GOR128-G	LASS	2023.01.27 / Seq-3	20	0.072	0.70654	0.00077	0.0376	0.00025					GOR128-G	2023.11.08 / Seq-2	LASS	1.39127	0.14	7.34259	1.56
	GOR128-G	LASS	2023.01.27 / Seq-3	35	0.061	0.70698	0.00053	0.0376	0.00012					GOR128-G	2023.11.08 / Seq-2	LASS	1.35568	0.15	7.18483	1.43
	GOR128-G	LASS	2023.01.27 / Seq-3	29.7	0.067	0.7065	0.00075	0.0376	0.00014					GOR128-G	2023.11.08 / Seq-2	LASS	1.34577	0.14	7.51405	1.58
	GOR128-G	LASS	2023.01.27 / Seq-3	35	0.062	0.70645	0.00075	0.03761	0.00023					GOR128-G	2023.11.08 / Seq-2	LASS	1.40417	0.15	8.03225	1.76
	GOR128-G	LASS	2023.01.27 / Seq-3	35	0.062	0.70672	0.00064	0.03765	0.00024					GOR128-G	2023.11.08 / Seq-2	LASS	1.45088	0.16	9.2896	2.13
	GOR128-G	LASS	2023.01.27 / Seq-3	21.4	0.07	0.70651	0.00075	0.03763	0.00042					GOR128-G	2023.11.08 / Seq-2	LASS	1.29686	0.14	7.88842	1.72
	GOR128-G	LASS	2023.01.27 / Seq-3	22.2	0.069	0.70611	0.00085	0.03755	0.00028					GOR128-G	2023.11.08 / Seq-2	LASS	1.30521	0.13	6.70245	1.31
	GOR128-G	LASS	2023.01.27 / Seq-3	35	0.062	0.70653	0.00079	0.03762	0.00018					GOR128-G	2023.11.08 / Seq-2	LASS	1.36957	0.15	6.10472	1.32
	GOR128-G	LASS	2023.01.27 / Seq-4	12.8	0.069	0.70661	0.001	0.03786	0.00041					GOR128-G	2023.11.08 / Seq-2	LASS	1.29577	0.13	7.77939	1.6
	GOR128-G	LASS	2023.01.27 / Seq-4	17.3	0.07	0.70685	0.00069	0.03757	0.00016					GOR128-G	2023.11.08 / Seq-2	LASS	1.31773	0.14	10.1282	2.2
	GOR128-G	LASS	2023.01.27 / Seq-4	19.4	0.071	0.70658	0.00097	0.03753	0.00026					GOR128-G	2023.11.08 / Seq-2	LASS	1.33278	0.14	7.91703	1.65
	GOR128-G	LASS	2023.01.27 / Seq-4	22.3	0.069	0.70645	0.00093	0.03758	0.00029					GOR128-G	2023.11.08 / Seq-2	LASS	1.43138	0.15	7.90545	1.76
	GOR128-G	LASS	2023.01.27 / Seq-4	27.2	0.064	0.70686	0.00078	0.03757	0.00023					GOR128-G	2023.11.09 / Seq-2	LASS	1.3895	0.15	7.51283	1.68
	GOR128-G	LASS	2023.01.27 / Seq-4	27	0.063	0.70617	0.00079	0.03786	0.00024					GOR128-G	2023.11.09 / Seq-2	LASS	1.26127	0.13	8.7404	1.88
	GOR128-G	LASS	2023.01.27 / Seq-4	34.3	0.062	0.7058	0.00069	0.03743	0.00023					GOR128-G	2023.11.09 / Seq-2	LASS	1.39093	0.15	7.46944	1.52
	GOR128-G	LASS	2023.01.27 / Seq-4	24.5	0.066	0.70589	0.00118	0.03827	0.00057					GOR128-G	2023.11.09 / Seq-2	LASS	1.4004	0.16	7.25511	1.58
	GOR128-G	LASS	2023.01.27 / Seq-4	34.4	0.06	0.70597	0.00086	0.03754	0.00021					GOR128-G	2023.11.09 / Seq-2	LASS	1.36177	0.16	8.27538	1.81
	GOR128-G	LASS	2023.01.27 / Seq-4	25.1	0.072	0.70674	0.00056	0.03744	0.00058					GOR128-G	2023.11.09 / Seq-2	LASS	1.39767	0.15	7.85698	1.65
	GOR128-G	LASS	2023.11.08 / Seq-2	36.008	0.0476683	0.707101	0.000864965	0.0371348	0.000440721					GOR128-G	2023.11.09 / Seq-2	LASS	1.34996	0.14	7.76322	1.6
	GOR128-G	LASS	2023.11.08 / Seq-2	36.004	0.0476911	0.706456	0.000986766	0.0377725	0.000262004					GOR128-G	2023.11.09 / Seq-2	LASS	1.30503	0.14	8.36353	1.79
	GOR128-G	LASS	2023.11.08 / Seq-2	36.006	0.0486467	0.707025	0.000649037	0.0375959	0.000241171					GOR128-G	2023.11.09 / Seq-2	LASS	1.418	0.14	7.24411	1.48
	GOR128-G	LASS	2023.11.08 / Seq-2	36.004	0.05062	0.706886	0.000871528	0.0377791	0.000479487					GOR128-G	2023.11.09 / Seq-2	LASS	1.38036	0.16	8.61974	1.95
	GOR128-G	LASS	2023.11.08 / Seq-2	36.006	0.0484362	0.70678	0.00103193	0.037505	0.000255465					GOR128-G	2023.11.09 / Seq-2	LASS	1.30632	0.14	8.18574	1.66
	GOR128-G	LASS	2023.11.08 / Seq-2	36.006	0.0541712	0.706677	0.000701133	0.0376423	0.00022784					GOR128-G	2023.11.09 / Seq-2	LASS	1.48384	0.15	7.67595	1.54
	GOR128-G	LASS	2023.11.08 / Seq-2	36.006	0.0504317	0.706722	0.000774666	0.0376176	0.000268814					GOR128-G	2023.11.09 / Seq-2	LASS	1.28221	0.14	8.4147	1.81
	GOR128-G	LASS	2023.11.08 / Seq-2	18.9521	0.0640048	0.707586	0.000940535	0.0374565	0.000405527					GOR128-G	2023.11.10 / Seq-2	LASS	1.39938	0.14	8.03992	1.64
	GOR128-G	LASS	2023.11.08 / Seq-2	36.004	0.0509153	0.706863	0.000716735	0.0376126	0.000253422					GOR128-G	2023.11.10 / Seq-2	LASS	1.40767	0.14	7.83515	1.66
	GOR128-G	LASS	2023.11.08 / Seq-2	36.005	0.0522919	0.706916	0.000906914	0.0376239	0.000181399					GOR128-G	2023.11.10 / Seq-2	LASS	1.33772	0.14	9.35151	2.04
	GOR128-G	LASS	2023.11.08 / Seq-2	36.004	0.0514835	0.706788	0.000660699	0.0375516	0.000284209					GOR128-G	2023.11.10 / Seq-2	LASS	1.40487	0.15	8.4503	1.84
	GOR128-G	LASS	2023.11.08 / Seq-2	36.006	0.0503208	0.70685	0.000879317	0.0376068	0.000247824					GOR128-G	2023.11.10 / Seq-2	LASS	1.38356	0.14	7.12337	1.51
	GOR128-G	LASS	2023.11.09 / Seq-2	28.4817	0.0516894	0.707427	0.000735003	0.0377614	0.000428523					GOR128-G	2023.11.10 / Seq-2	LASS	1.32103	0.14	7.61233	1.56
	GOR128-G	LASS	2023.11.09 / Seq-2	32.0072	0.0498698	0.706806	0.000787913	0.0374138	0.000440267					GOR128-G	2023.11.10 / Seq-2	LASS	1.37323	0.15	7.71576	1.65
	GOR128-G	LASS	2023.11.09 / Seq-2	34.472	0.0503296	0.706523	0.00081547	0.0375996	0.000359833					GOR128-G	2023.11.10 / Seq-2	LASS	1.37587	0.15	8.52938	1.84
	GOR128-G	LASS	2023.11.09 / Seq-2	36.004	0.0521712	0.7067	0.000867982	0.0376092	0.000217992					GOR128-G	2023.11.10 / Seq-2	LASS	1.4004	0.15	7.74139	1.64
	GOR128-G	LASS	2023.11.09 / Seq-2	33.8998	0.0538668	0.706459	0.000938375	0.037592	0.000261695					GOR128-G	2023.11.10 / Seq-2	LASS	1.30878	0.12	7.7643	1.6
	GOR128-G	LASS	2023.11.09 / Seq-2	36.006	0.0500659	0.70719	0.000704986	0.0376019	0.0003286
	GOR128-G	LASS	2023.11.09 / Seq-2	24.0851	0.0565028	0.707117	0.000864181	0.0375812	0.000258735
	GOR128-G	LASS	2023.11.09 / Seq-2	31.4196	0.0546503	0.706458	0.000714594	0.0376789	0.000259635					KL2-G	2022.02.21 / Seq-1	LASIS	15.76	1.15	25.92	3.25
	GOR128-G	LASS	2023.11.09 / Seq-2	34.4546	0.0510823	0.706834	0.000675486	0.0374504	0.000300251					KL2-G	2022.02.21 / Seq-1	LASIS	15.48	1.16	24.29	3.02
	GOR128-G	LASS	2023.11.09 / Seq-2	34.1617	0.0498222	0.707029	0.000718362	0.0376597	0.00024878					KL2-G	2022.02.21 / Seq-1	LASIS	14.97	1.09	25.83	3.08
	GOR128-G	LASS	2023.11.09 / Seq-2	34.2206	0.0488394	0.706505	0.000792675	0.0375885	0.00024288					KL2-G	2022.02.21 / Seq-1	LASIS	15.04	1.05	25.48	3.18
	GOR128-G	LASS	2023.11.09 / Seq-2	36.005	0.0508208	0.706801	0.000789974	0.0376405	0.000204134					KL2-G	2022.02.21 / Seq-1	LASIS	15.88	1.21	26.06	3.16
	GOR128-G	LASS	2023.11.09 / Seq-2	34.6668	0.0507106	0.707455	0.00077611	0.0375582	0.000209907					KL2-G	2022.02.21 / Seq-1	LASIS	14.89	1.07	25.14	3.18
	GOR128-G	LASS	2023.11.10 / Seq-2	33.6946	0.0450013	0.706605	0.00102026	0.0375746	0.000416455					KL2-G	2022.02.21 / Seq-1	LASIS	15.31	1.06	26.59	3.31
	GOR128-G	LASS	2023.11.10 / Seq-2	34.7387	0.0452538	0.706503	0.000830778	0.0376207	0.000346646					KL2-G	2022.02.21 / Seq-1	LASIS	15.3	1.13	25.82	3.14
	GOR128-G	LASS	2023.11.10 / Seq-2	29.5133	0.0441875	0.707295	0.000672651	0.0376483	0.000232516					KL2-G	2022.02.21 / Seq-1	LASIS	15.19	1.14	25.02	3.1
	GOR128-G	LASS	2023.11.10 / Seq-2	32.0421	0.0448132	0.707178	0.000892276	0.037505	0.000211984					KL2-G	2022.02.21 / Seq-1	LASIS	15.4	1.06	25.09	3.04
	GOR128-G	LASS	2023.11.10 / Seq-2	32.5813	0.046805	0.706626	0.000781556	0.0377079	0.000263641					KL2-G	2022.02.21 / Seq-1	LASIS	14.92	1.09	25.41	3.11
	GOR128-G	LASS	2023.11.10 / Seq-2	32.2611	0.0447452	0.706845	0.000893119	0.0375801	0.000302163					KL2-G	2022.02.21 / Seq-1	LASIS	15.55	1.15	24.97	3.09
	GOR128-G	LASS	2023.11.10 / Seq-2	32.9735	0.0478935	0.706737	0.00113472	0.037604	0.000205159					KL2-G	2022.02.21 / Seq-1	LASIS	15.98	1.14	25.86	3.18
	GOR128-G	LASS	2023.11.10 / Seq-2	33.4589	0.046607	0.707304	0.000969938	0.0375433	0.00023172					KL2-G	2022.02.21 / Seq-1	LASIS	15.68	1.18	25.91	3.1
	GOR128-G	LASS	2023.11.10 / Seq-2	35.676	0.0487125	0.706934	0.000758307	0.0376762	0.000232661					KL2-G	2022.02.21 / Seq-1	LASIS	15.7	1.14	24.48	2.98
	GOR128-G	LASS	2023.11.10 / Seq-2	36.004	0.0497416	0.70673	0.000667461	0.0375392	0.000327473					KL2-G	2022.02.21 / Seq-1	LASIS	16.17	1.17	24.7	3.07
				29.7742	AVG	0.706706								KL2-G	2022.02.21 / Seq-1	LASIS	15.22	1.05	25.14	3
					2STD	0.000823595								KL2-G	2022.02.21 / Seq-1	LASIS	15.54	1.08	25.81	3.2
	KL2-G	LASIS	2022.06.29 / Seq-2	36	0.754	0.70373	0.00035	0.0666	0.00061					KL2-G	2022.02.21 / Seq-1	LASIS	15.25	1.06	26.78	3.29
	KL2-G	LASIS	2022.06.29 / Seq-2	36	0.731	0.70344	0.00033	0.06662	0.0007					KL2-G	2022.02.21 / Seq-1	LASIS	15.38	1.14	26.32	3.19
	KL2-G	LASIS	2022.06.29 / Seq-2	36	0.757	0.70379	0.00035	0.06615	0.00062					KL2-G	2022.02.21 / Seq-1	LASIS	15.69	1.11	25.73	3.11
	KL2-G	LASIS	2022.06.29 / Seq-2	36	0.792	0.70372	0.00045	0.06651	0.00041					KL2-G	2022.02.21 / Seq-1	LASIS	15.96	1.18	25.08	3
	KL2-G	LASIS	2022.06.29 / Seq-2	35.9	0.788	0.70344	0.00034	0.06666	0.00027					KL2-G	2022.06.30 / Seq-2	LASIS	15.59	1.1	22.75	2.64
	KL2-G	LASIS	2022.06.29 / Seq-2	36	0.797	0.70358	0.00032	0.06628	0.00036					KL2-G	2022.06.30 / Seq-2	LASIS	14.9	1.12	24.33	2.9
	KL2-G	LASIS	2022.06.29 / Seq-2	36	0.774	0.70376	0.00032	0.06675	0.00031					KL2-G	2022.06.30 / Seq-2	LASIS	14.96	1.14	24.42	2.91
	KL2-G	LASIS	2022.06.29 / Seq-2	36	0.77	0.70359	0.00036	0.06626	0.00023					KL2-G	2022.06.30 / Seq-2	LASIS	15.53	1.14	24.73	2.99
	KL2-G	LASIS	2022.06.29 / Seq-2	36	0.774	0.70355	0.00039	0.06635	0.00041					KL2-G	2022.06.30 / Seq-2	LASIS	15.11	1.15	24.16	2.86
	KL2-G	LASIS	2022.06.29 / Seq-2	35.9	0.77	0.70349	0.00027	0.06574	0.00028					KL2-G	2022.06.30 / Seq-2	LASIS	15.58	1.13	24.25	2.91
	KL2-G	LASIS	2022.06.29 / Seq-3	36	0.689	0.70355	0.00036	0.06871	0.00019					KL2-G	2022.06.30 / Seq-2	LASIS	15.21	1.15	24.49	2.9
	KL2-G	LASIS	2022.06.29 / Seq-3	36	0.699	0.70347	0.00029	0.06757	0.0005					KL2-G	2022.06.30 / Seq-2	LASIS	15.46	1.15	24.64	2.89
	KL2-G	LASIS	2022.06.29 / Seq-3	36	0.723	0.70355	0.00033	0.06764	0.00049					KL2-G	2022.07.07 / Seq-2	LASIS	15.6	1.19	24.94	2.93
	KL2-G	LASIS	2022.06.29 / Seq-3	36	0.681	0.70367	0.0003	0.06858	0.00034					KL2-G	2022.07.07 / Seq-2	LASIS	15.87	1.23	25.96	3.08
	KL2-G	LASIS	2022.06.29 / Seq-3	36	0.719	0.7036	0.00033	0.06941	0.00032					KL2-G	2022.07.07 / Seq-2	LASIS	15.47	1.1	26.42	3.08
	KL2-G	LASIS	2022.06.29 / Seq-3	36	0.743	0.70358	0.00031	0.0683	0.00028					KL2-G	2022.07.07 / Seq-2	LASIS	15.52	1.09	25.67	3.03
	KL2-G	LASIS	2022.06.29 / Seq-3	36	0.746	0.70351	0.00041	0.06933	0.00027					KL2-G	2022.07.07 / Seq-2	LASIS	15.58	1.08	25.55	3.03
	KL2-G	LASIS	2022.06.29 / Seq-3	36	0.747	0.70361	0.00032	0.06878	0.0003					KL2-G	2022.07.07 / Seq-2	LASIS	15.28	1.04	25.46	3
	KL2-G	LASIS	2022.06.29 / Seq-3	36	0.741	0.70361	0.00038	0.06993	0.00032					KL2-G	2022.07.07 / Seq-2	LASIS	15.37	1.17	25.31	2.95
	KL2-G	LASIS	2022.06.29 / Seq-3	36	0.752	0.70352	0.00034	0.06952	0.00021					KL2-G	2022.07.07 / Seq-2	LASIS	15.02	1.13	26.31	3.14
	KL2-G	LASIS	2022.06.29 / Seq-4	36	0.657	0.70355	0.00039	0.06849	0.0003					KL2-G	2022.07.07 / Seq-2	LASIS	15.06	1.15	25.46	3.13
	KL2-G	LASIS	2022.06.29 / Seq-4	36	0.674	0.70362	0.00026	0.06751	0.00037					KL2-G	2022.07.07 / Seq-2	LASIS	15.76	1.14	26.23	3.17
	KL2-G	LASIS	2022.06.29 / Seq-4	36	0.688	0.70359	0.0003	0.06737	0.00046					KL2-G	2022.07.08 / Seq-2	LASIS	15.47	1.14	26.84	3.09
	KL2-G	LASIS	2022.06.29 / Seq-4	36	0.709	0.70346	0.00032	0.06833	0.00035					KL2-G	2022.07.08 / Seq-2	LASIS	15.48	1.19	25.15	2.9
	KL2-G	LASIS	2022.06.29 / Seq-4	36	0.71	0.70348	0.00032	0.06945	0.00034					KL2-G	2022.07.08 / Seq-2	LASIS	15.74	1.2	24.59	2.83
	KL2-G	LASIS	2022.06.29 / Seq-4	36	0.712	0.70344	0.00027	0.06871	0.00039					KL2-G	2022.07.08 / Seq-2	LASIS	15.35	1.2	24.74	2.82
	KL2-G	LASIS	2022.06.29 / Seq-4	32.7	0.697	0.70359	0.00051	0.06921	0.00027					KL2-G	2022.07.08 / Seq-2	LASIS	15.12	1.19	26.14	3.07
	KL2-G	LASS	2022.05.06 / Seq-3a	22.5	0.839	0.70352	0.00046	0.06964	0.00145					KL2-G	2022.07.08 / Seq-2	LASIS	15.29	1.18	25.6	2.94
	KL2-G	LASS	2022.05.06 / Seq-3a	22.2	0.869	0.70348	0.00049	0.06804	0.00134					KL2-G	2022.07.08 / Seq-2	LASIS	15.48	1.22	25.37	2.92
	KL2-G	LASS	2022.05.06 / Seq-3a	22.1	0.844	0.70361	0.00046	0.06822	0.00118					KL2-G	2022.07.08 / Seq-2	LASIS	15.23	1.19	24.96	2.86
	KL2-G	LASS	2022.05.06 / Seq-3a	24	0.913	0.70363	0.00043	0.06755	0.0013					KL2-G	2022.05.06 / Seq-3a	LASS	16.38	2.27	26.28	4.65
	KL2-G	LASS	2022.05.06 / Seq-3a	20.1	0.816	0.70363	0.00032	0.06828	0.00107					KL2-G	2022.05.06 / Seq-3a	LASS	16.54	2.16	27.65	4.89
	KL2-G	LASS	2022.05.06 / Seq-3a	18.9	0.947	0.70357	0.00051	0.06665	0.0012					KL2-G	2022.05.06 / Seq-3a	LASS	16.64	2.1	27.06	4.43
	KL2-G	LASS	2022.05.06 / Seq-3a	19.6	0.893	0.7035	0.00052	0.06664	0.00109					KL2-G	2022.05.06 / Seq-3a	LASS	16.19	1.81	24.83	4.1
	KL2-G	LASS	2022.05.06 / Seq-3a	20	0.878	0.70379	0.00044	0.0672	0.00089					KL2-G	2022.05.06 / Seq-3a	LASS	15.89	2.01	24.29	4.06
	KL2-G	LASS	2022.05.06 / Seq-3b	26	0.907	0.70364	0.00066	0.06835	0.00128					KL2-G	2022.05.06 / Seq-3a	LASS	15.28	2.02	25.34	4.12
	KL2-G	LASS	2022.05.06 / Seq-3b	26	0.914	0.70357	0.00065	0.06706	0.00135					KL2-G	2022.05.06 / Seq-3a	LASS	16.26	2.16	25.22	3.81
	KL2-G	LASS	2022.05.06 / Seq-3b	26	0.95	0.70375	0.00084	0.06612	0.00128					KL2-G	2022.05.06 / Seq-3a	LASS	16.95	2.37	24.65	3.77
	KL2-G	LASS	2022.05.06 / Seq-3b	26	0.939	0.70348	0.00054	0.06649	0.00123					KL2-G	2022.05.06 / Seq-3b	LASS	16.72	2.16	25.09	4.2
	KL2-G	LASS	2022.05.06 / Seq-3b	26	0.955	0.70368	0.00068	0.06603	0.00125					KL2-G	2022.05.06 / Seq-3b	LASS	16.83	2.23	23.67	4.13
	KL2-G	LASS	2022.05.06 / Seq-3b	26	0.932	0.70343	0.00047	0.06648	0.00119					KL2-G	2022.05.06 / Seq-3b	LASS	16.31	2.13	24.8	4.5
	KL2-G	LASS	2022.05.06 / Seq-3b	26	0.965	0.70363	0.00064	0.06665	0.00135					KL2-G	2022.05.06 / Seq-3b	LASS	15.64	2.01	25.57	4.63
	KL2-G	LASS	2022.05.06 / Seq-3b	25.9	0.949	0.70366	0.00064	0.06649	0.00124					KL2-G	2022.05.06 / Seq-3b	LASS	17.02	2.39	24.68	4.13
	KL2-G	LASS	2022.09.09 / Seq-2	36	0.706	0.70371	0.00032	0.06985	0.00114					KL2-G	2022.05.06 / Seq-3b	LASS	17	2.24	24.21	4.25
	KL2-G	LASS	2022.09.09 / Seq-2	36	0.743	0.70386	0.00039	0.06963	0.00115					KL2-G	2022.05.06 / Seq-3b	LASS	16.51	1.91	23.45	4.1
	KL2-G	LASS	2022.09.09 / Seq-2	36	0.756	0.70372	0.00041	0.06608	0.00048					KL2-G	2022.05.06 / Seq-3b	LASS	16.54	2.22	24.84	4.76
	KL2-G	LASS	2022.09.09 / Seq-2	36	0.767	0.70366	0.00042	0.06604	0.00044					KL2-G	2022.09.09 / Seq-2	LASS	15.89	0.93	26.1	2.91
	KL2-G	LASS	2022.09.09 / Seq-2	36	0.762	0.70366	0.00031	0.06616	0.00072					KL2-G	2022.09.09 / Seq-2	LASS	16.28	0.96	26.14	2.96
	KL2-G	LASS	2022.09.09 / Seq-2	36	0.753	0.70374	0.00034	0.06929	0.00076					KL2-G	2022.09.09 / Seq-2	LASS	15.94	0.94	25.29	2.81
	KL2-G	LASS	2022.09.09 / Seq-2	36	0.754	0.70349	0.00042	0.06684	0.00065					KL2-G	2022.09.09 / Seq-2	LASS	16.09	0.93	24.95	2.81
	KL2-G	LASS	2022.09.09 / Seq-2	36	0.762	0.70375	0.00051	0.06007	0.00047					KL2-G	2022.09.09 / Seq-2	LASS	16.09	0.98	24.6	2.75
	KL2-G	LASS	2022.09.09 / Seq-2	36	0.757	0.70382	0.00042	0.06323	0.00067					KL2-G	2022.09.09 / Seq-2	LASS	15.36	0.96	24.94	2.76
	KL2-G	LASS	2022.09.09 / Seq-3	36	0.749	0.70349	0.00046	0.06797	0.00096					KL2-G	2022.09.09 / Seq-2	LASS	16.03	0.95	25.07	2.75
	KL2-G	LASS	2022.09.09 / Seq-3	36	0.759	0.70376	0.00054	0.06689	0.00111					KL2-G	2022.09.09 / Seq-2	LASS	16.05	0.91	24.95	2.75
	KL2-G	LASS	2022.09.09 / Seq-3	36	0.765	0.70357	0.00032	0.06657	0.00072					KL2-G	2022.09.09 / Seq-2	LASS	15.59	0.92	25.13	2.79
	KL2-G	LASS	2022.09.09 / Seq-3	36	0.793	0.70359	0.0004	0.06691	0.00059					KL2-G	2022.09.09 / Seq-3	LASS	15.53	0.92	25.73	2.83
	KL2-G	LASS	2022.09.09 / Seq-3	36	0.791	0.70379	0.00046	0.06569	0.00058					KL2-G	2022.09.09 / Seq-3	LASS	15.87	0.94	25.29	2.75
	KL2-G	LASS	2022.09.09 / Seq-3	36	0.795	0.70369	0.00035	0.06546	0.00078					KL2-G	2022.09.09 / Seq-3	LASS	15.87	0.94	25.78	2.84
	KL2-G	LASS	2022.09.09 / Seq-3	36	0.789	0.70371	0.00043	0.06741	0.00066					KL2-G	2022.09.09 / Seq-3	LASS	16.23	0.94	24.98	2.73
	KL2-G	LASS	2022.09.09 / Seq-3	36	0.784	0.70371	0.00033	0.06698	0.00094					KL2-G	2022.09.09 / Seq-3	LASS	16.26	0.96	24.73	2.71
	KL2-G	LASS	2022.09.09 / Seq-3	36	0.817	0.70374	0.0004	0.06454	0.00058					KL2-G	2022.09.09 / Seq-3	LASS	16.17	0.96	25.32	2.8
	KL2-G	LASS	2023.01.27 / Seq-3	35	0.75	0.70367	0.00038	0.0648	0.00031					KL2-G	2022.09.09 / Seq-3	LASS	16.34	0.94	25.26	2.78
	KL2-G	LASS	2023.01.27 / Seq-3	35	0.765	0.70355	0.00039	0.06642	0.00037					KL2-G	2022.09.09 / Seq-3	LASS	16.15	0.94	24.74	2.73
	KL2-G	LASS	2023.01.27 / Seq-3	35	0.742	0.70354	0.00038	0.06786	0.0003					KL2-G	2022.09.09 / Seq-3	LASS	16.35	0.95	25.1	2.74
	KL2-G	LASS	2023.01.27 / Seq-3	35	0.773	0.70366	0.00041	0.0671	0.0004					KL2-G	2022.11.22 / Seq-1	LASS	15.72	1.07	26.39	3.11
	KL2-G	LASS	2023.01.27 / Seq-3	35	0.763	0.70371	0.00037	0.0675	0.0004					KL2-G	2022.11.22 / Seq-1	LASS	15.55	1.02	26.72	3.11
	KL2-G	LASS	2023.01.27 / Seq-3	35	0.801	0.70363	0.00032	0.06709	0.00031					KL2-G	2022.11.22 / Seq-1	LASS	15.25	0.94	26.31	3.13
	KL2-G	LASS	2023.01.27 / Seq-3	35	0.761	0.70359	0.0004	0.06564	0.00039					KL2-G	2022.11.22 / Seq-1	LASS	15.82	1.06	28.13	3.35
	KL2-G	LASS	2023.01.27 / Seq-3	35	0.779	0.70347	0.00043	0.06644	0.00035					KL2-G	2022.11.22 / Seq-1	LASS	15.52	1.04	26.45	3.24
	KL2-G	LASS	2023.01.27 / Seq-4	32.2	0.804	0.70362	0.00043	0.06735	0.00021					KL2-G	2022.11.22 / Seq-1	LASS	15.57	1.13	27.26	3.2
	KL2-G	LASS	2023.01.27 / Seq-4	33.8	0.722	0.70375	0.00042	0.06706	0.00019					KL2-G	2022.11.22 / Seq-1	LASS	15.49	1.02	26.68	3.14
	KL2-G	LASS	2023.01.27 / Seq-4	31.5	0.725	0.7036	0.00038	0.06613	0.00022					KL2-G	2022.11.22 / Seq-1	LASS	15.42	1.17	27.09	3.27
	KL2-G	LASS	2023.01.27 / Seq-4	32.4	0.746	0.70374	0.00038	0.0657	0.00035					KL2-G	2023.01.27 / Seq-3	LASS	16	0.9	26.75	2.89
	KL2-G	LASS	2023.01.27 / Seq-4	30.8	0.725	0.70354	0.00037	0.06677	0.00027					KL2-G	2023.01.27 / Seq-3	LASS	15.7	0.92	25.77	2.8
	KL2-G	LASS	2023.01.27 / Seq-4	35	0.767	0.70381	0.00043	0.06632	0.00032					KL2-G	2023.01.27 / Seq-3	LASS	15.68	0.9	26.73	2.94
	KL2-G	LASS	2023.01.27 / Seq-4	33.3	0.741	0.70362	0.00028	0.06755	0.0002					KL2-G	2023.01.27 / Seq-3	LASS	15.86	0.84	26.92	2.95
	KL2-G	LASS	2023.01.27 / Seq-4	33.7	0.747	0.70368	0.00042	0.06813	0.0003					KL2-G	2023.01.27 / Seq-3	LASS	15.99	0.94	26.11	2.82
	KL2-G	LASS	2023.11.08 / Seq-2	36.006	0.585401	0.703176	0.000420501	0.0674848	0.000591679					KL2-G	2023.01.27 / Seq-3	LASS	15.96	0.88	26.27	2.86
	KL2-G	LASS	2023.11.08 / Seq-2	36.006	0.609392	0.703118	0.000383081	0.0675818	0.000943147					KL2-G	2023.01.27 / Seq-3	LASS	15.99	0.89	26.2	2.88
	KL2-G	LASS	2023.11.08 / Seq-2	36.004	0.633842	0.703223	0.000307921	0.0675237	0.000709979					KL2-G	2023.01.27 / Seq-3	LASS	16.11	0.91	26.24	2.82
	KL2-G	LASS	2023.11.08 / Seq-2	36.004	0.641594	0.703311	0.000435576	0.0670872	0.000646128					KL2-G	2023.01.27 / Seq-4	LASS	15.35	0.88	26.08	2.84
	KL2-G	LASS	2023.11.08 / Seq-2	36.004	0.642767	0.703195	0.000346988	0.0686388	0.000788126					KL2-G	2023.01.27 / Seq-4	LASS	15.98	0.94	26.09	2.85
	KL2-G	LASS	2023.11.08 / Seq-2	36.004	0.63665	0.703351	0.000485552	0.0687664	0.000703382					KL2-G	2023.01.27 / Seq-4	LASS	16.17	0.94	25.95	2.85
	KL2-G	LASS	2023.11.08 / Seq-2	36.006	0.64103	0.703414	0.000311411	0.068812	0.000628612					KL2-G	2023.01.27 / Seq-4	LASS	16.26	0.92	25.97	2.81
	KL2-G	LASS	2023.11.08 / Seq-2	36.006	0.650534	0.703332	0.000382802	0.068715	0.000842768					KL2-G	2023.01.27 / Seq-4	LASS	16.25	0.93	25.96	2.85
	KL2-G	LASS	2023.11.08 / Seq-2	34.3576	0.643663	0.703472	0.000569463	0.0676614	0.000764771					KL2-G	2023.01.27 / Seq-4	LASS	16.14	0.91	26.26	2.86
	KL2-G	LASS	2023.11.08 / Seq-2	36.004	0.621326	0.703359	0.000318062	0.0682022	0.000655646					KL2-G	2023.01.27 / Seq-4	LASS	16.22	0.94	25.67	2.81
	KL2-G	LASS	2023.11.08 / Seq-2	36.004	0.633927	0.703565	0.000336911	0.0676755	0.000701377					KL2-G	2023.01.27 / Seq-4	LASS	15.78	0.96	26.05	2.84
	KL2-G	LASS	2023.11.08 / Seq-2	36.004	0.643062	0.70343	0.000362902	0.067813	0.000854458					KL2-G	2023.11.08 / Seq-2	LASS	15.4628	0.66	25.1178	2.72
	KL2-G	LASS	2023.11.09 / Seq-2	36.006	0.585288	0.703487	0.000296425	0.0682128	0.00074723					KL2-G	2023.11.08 / Seq-2	LASS	15.7596	0.69	25.4444	2.77
	KL2-G	LASS	2023.11.09 / Seq-2	36.02	0.593711	0.703665	0.000374207	0.0682393	0.000911425					KL2-G	2023.11.08 / Seq-2	LASS	16.2758	0.76	25.0052	2.7
	KL2-G	LASS	2023.11.09 / Seq-2	36.022	0.598169	0.703414	0.000439033	0.067319	0.000885773					KL2-G	2023.11.08 / Seq-2	LASS	15.6531	0.7	25.5463	2.8
	KL2-G	LASS	2023.11.09 / Seq-2	36.004	0.617167	0.703455	0.000448902	0.0667599	0.000690136					KL2-G	2023.11.08 / Seq-2	LASS	16.0256	0.71	25.7872	2.8
	KL2-G	LASS	2023.11.09 / Seq-2	36.008	0.62045	0.703482	0.000326993	0.0673062	0.000598833					KL2-G	2023.11.08 / Seq-2	LASS	15.9524	0.7	26.1727	2.84
	KL2-G	LASS	2023.11.09 / Seq-2	36.004	0.629573	0.703643	0.000421407	0.0675923	0.000631519					KL2-G	2023.11.08 / Seq-2	LASS	15.5265	0.68	25.252	2.75
	KL2-G	LASS	2023.11.09 / Seq-2	36.006	0.633376	0.703596	0.000488958	0.0681492	0.000545873					KL2-G	2023.11.08 / Seq-2	LASS	16.0404	0.73	25.0486	2.74
	KL2-G	LASS	2023.11.09 / Seq-2	36.01	0.609042	0.703551	0.000325589	0.0676651	0.00072					KL2-G	2023.11.08 / Seq-2	LASS	15.9482	0.74	25.3668	2.77
	KL2-G	LASS	2023.11.09 / Seq-2	36.004	0.605462	0.703491	0.000396503	0.0684654	0.000578563					KL2-G	2023.11.08 / Seq-2	LASS	15.8858	0.75	26.553	2.92
	KL2-G	LASS	2023.11.09 / Seq-2	36.005	0.615153	0.703606	0.000440598	0.0685233	0.000620872					KL2-G	2023.11.08 / Seq-2	LASS	15.9933	0.64	26.1003	2.84
	KL2-G	LASS	2023.11.09 / Seq-2	36.016	0.616572	0.703714	0.000577582	0.068307	0.000796948					KL2-G	2023.11.08 / Seq-2	LASS	15.6863	0.62	24.7881	2.7
	KL2-G	LASS	2023.11.09 / Seq-2	36.004	0.632217	0.703525	0.000538891	0.0682602	0.0008204					KL2-G	2023.11.09 / Seq-2	LASS	16.5273	0.76	26.8824	2.93
	KL2-G	LASS	2023.11.10 / Seq-2	36.052	0.559254	0.703318	0.000557586	0.0688123	0.00107743					KL2-G	2023.11.09 / Seq-2	LASS	15.9581	0.77	27.144	2.98
	KL2-G	LASS	2023.11.10 / Seq-2	36.004	0.57862	0.703125	0.000586899	0.068424	0.00056393					KL2-G	2023.11.09 / Seq-2	LASS	15.8652	0.67	26.5432	2.91
	KL2-G	LASS	2023.11.10 / Seq-2	36.006	0.582421	0.703299	0.000378078	0.0681159	0.000997116					KL2-G	2023.11.09 / Seq-2	LASS	16.1967	0.67	26.5946	2.91
	KL2-G	LASS	2023.11.10 / Seq-2	36.004	0.585704	0.703215	0.000479503	0.0681597	0.00107234					KL2-G	2023.11.09 / Seq-2	LASS	15.5548	0.77	25.654	2.79
	KL2-G	LASS	2023.11.10 / Seq-2	36.004	0.602847	0.703342	0.000422514	0.0677283	0.000725854					KL2-G	2023.11.09 / Seq-2	LASS	15.915	0.63	27.0356	2.94
	KL2-G	LASS	2023.11.10 / Seq-2	36.006	0.604825	0.70332	0.000426815	0.0684175	0.000700345					KL2-G	2023.11.09 / Seq-2	LASS	16.1787	0.72	27.2546	2.98
	KL2-G	LASS	2023.11.10 / Seq-2	36.004	0.605777	0.703551	0.000401848	0.0675713	0.000611325					KL2-G	2023.11.09 / Seq-2	LASS	16.1208	0.78	26.1775	2.85
	KL2-G	LASS	2023.11.10 / Seq-2	36.004	0.615692	0.70355	0.000527476	0.0675054	0.000880325					KL2-G	2023.11.09 / Seq-2	LASS	16.122	0.76	26.7705	2.92
	KL2-G	LASS	2023.11.10 / Seq-2	36.004	0.622848	0.703358	0.000409824	0.0682507	0.000815904					KL2-G	2023.11.09 / Seq-2	LASS	16.0489	0.64	27.0697	2.92
	KL2-G	LASS	2023.11.10 / Seq-2	36.018	0.612711	0.703648	0.000539159	0.0688716	0.000584696					KL2-G	2023.11.09 / Seq-2	LASS	15.6755	0.71	26.7487	2.92
	KL2-G	LASS	2023.11.10 / Seq-2	36.066	0.601847	0.703623	0.000386869	0.0677371	0.000768138					KL2-G	2023.11.09 / Seq-2	LASS	15.9975	0.68	26.9704	2.98
	KL2-G	LASS	2023.11.10 / Seq-2	36.006	0.59057	0.703487	0.000401808	0.068224	0.000517114					KL2-G	2023.11.10 / Seq-2	LASS	15.9751	0.67	26.4259	2.89
	KL2-G	LASS	2023.11.10 / Seq-2	36.004	0.590826	0.703564	0.000354401	0.0682929	0.000680316					KL2-G	2023.11.10 / Seq-2	LASS	15.839	0.7	27.1777	2.96
	KL2-G	LASS	2023.11.10 / Seq-2	36.006	0.605923	0.703725	0.000410608	0.0669706	0.000644514					KL2-G	2023.11.10 / Seq-2	LASS	15.9821	0.63	25.921	2.81
	KL2-G	LASS	2023.11.10 / Seq-2	36.006	0.610668	0.703693	0.000367766	0.0686374	0.000592391					KL2-G	2023.11.10 / Seq-2	LASS	16.0137	0.74	26.9633	2.97
	KL2-G	LASS	2023.11.10 / Seq-2	36.004	0.613646	0.703631	0.000386399	0.0686564	0.000553824					KL2-G	2023.11.10 / Seq-2	LASS	15.6748	0.66	27.248	3
				33.9762	AVG	0.703562								KL2-G	2023.11.10 / Seq-2	LASS	15.6978	0.75	27.461	2.99
					2STD	0.000305353								KL2-G	2023.11.10 / Seq-2	LASS	15.496	0.64	26.0687	2.87
	NIST614-G	LASIS	2022.02.15 / Seq-1	28.7	0.156	0.70842	0.00049	0.04735	0.0002					KL2-G	2023.11.10 / Seq-2	LASS	16.1157	0.69	26.9705	2.93
	NIST614-G	LASIS	2022.02.15 / Seq-1	31	0.159	0.70822	0.00041	0.04683	0.00019					KL2-G	2023.11.10 / Seq-2	LASS	15.6391	0.71	26.4644	2.88
	NIST614-G	LASIS	2022.02.15 / Seq-1	31	0.158	0.70845	0.00038	0.04704	0.00018					KL2-G	2023.11.10 / Seq-2	LASS	15.9019	0.65	26.5711	2.88
	NIST614-G	LASIS	2022.02.15 / Seq-1	31	0.158	0.70812	0.00048	0.04727	0.0002					KL2-G	2023.11.10 / Seq-2	LASS	15.507	0.66	26.5789	2.89
	NIST614-G	LASIS	2022.02.15 / Seq-1	25	0.168	0.7079	0.00037	0.04709	0.00016					KL2-G	2023.11.10 / Seq-2	LASS	15.8086	0.61	27.3769	3.02
	NIST614-G	LASIS	2022.02.15 / Seq-1	27.6	0.162	0.70797	0.0004	0.04684	0.00019					KL2-G	2023.11.10 / Seq-2	LASS	15.4295	0.61	26.5314	2.88
	NIST614-G	LASIS	2022.02.15 / Seq-2	29.1	0.146	0.70812	0.00075	0.04713	0.00024					KL2-G	2023.11.10 / Seq-2	LASS	15.7865	0.69	26.2837	2.88
	NIST614-G	LASIS	2022.02.15 / Seq-2	31	0.159	0.70836	0.00041	0.04665	0.00019					KL2-G	2023.11.10 / Seq-2	LASS	15.762	0.63	26.5044	2.88
	NIST614-G	LASIS	2022.02.15 / Seq-2	29.4	0.16	0.70859	0.0004	0.04694	0.00016					KL2-G	2023.11.10 / Seq-2	LASS	15.8583	0.63	27.3497	2.97
	NIST614-G	LASIS	2022.02.15 / Seq-2	29.7	0.16	0.70832	0.00048	0.0472	0.00019
	NIST614-G	LASIS	2022.02.15 / Seq-2	15.2	0.13	0.70821	0.00046	0.04751	0.00022
	NIST614-G	LASIS	2022.02.15 / Seq-2	31	0.157	0.70813	0.00039	0.04686	0.0002					NIST-614	2022.06.30 / Seq-2	LASIS	0.39	0.04	1.02	0.14
	NIST614-G	LASIS	2022.02.15 / Seq-3	27.5	0.156	0.70846	0.00044	0.04593	0.00017					NIST-614	2022.06.30 / Seq-2	LASIS	0.34	0.03	1.03	0.15
	NIST614-G	LASIS	2022.02.15 / Seq-3	31	0.155	0.70849	0.00047	0.04629	0.00021					NIST-614	2022.06.30 / Seq-2	LASIS	0.34	0.04	0.99	0.13
	NIST614-G	LASIS	2022.02.15 / Seq-3	16.8	0.178	0.70828	0.00047	0.04532	0.00011					NIST-614	2022.06.30 / Seq-2	LASIS	0.35	0.04	0.99	0.14
	NIST614-G	LASIS	2022.02.15 / Seq-3	19.9	0.16	0.70849	0.00051	0.04557	0.00022					NIST-614	2022.06.30 / Seq-2	LASIS	0.33	0.03	1.02	0.15
	NIST614-G	LASIS	2022.02.15 / Seq-3	21	0.149	0.70843	0.0005	0.04514	0.00019					NIST-614	2022.06.30 / Seq-2	LASIS	0.32	0.03	0.98	0.13
	NIST614-G	LASIS	2022.02.15 / Seq-3	28.8	0.154	0.70824	0.00038	0.04505	0.00022					NIST-614	2022.06.30 / Seq-2	LASIS	0.35	0.04	0.96	0.13
	NIST614-G	LASIS	2022.02.15 / Seq-3	28.9	0.153	0.70827	0.00042	0.04592	0.00022					NIST-614	2022.06.30 / Seq-2	LASIS	0.32	0.04	1.1	0.17
	NIST614-G	LASIS	2022.02.15 / Seq-4	31	0.16	0.70818	0.00049	0.04573	0.0002					NIST-614	2022.07.07 / Seq-2	LASIS	0.35	0.03	0.94	0.12
	NIST614-G	LASIS	2022.02.15 / Seq-4	31	0.158	0.70824	0.00049	0.04555	0.00021					NIST-614	2022.07.07 / Seq-2	LASIS	0.35	0.04	0.99	0.13
	NIST614-G	LASIS	2022.02.15 / Seq-4	31	0.158	0.70854	0.00039	0.04562	0.00022					NIST-614	2022.07.07 / Seq-2	LASIS	0.36	0.04	1.04	0.13
	NIST614-G	LASIS	2022.02.15 / Seq-4	31	0.157	0.70847	0.00053	0.04541	0.00024					NIST-614	2022.07.07 / Seq-2	LASIS	0.33	0.03	0.95	0.12
	NIST614-G	LASIS	2022.02.17 / Seq-10	31	0.109	0.70842	0.00052	0.04211	0.00057					NIST-614	2022.07.07 / Seq-2	LASIS	0.33	0.03	0.96	0.13
	NIST614-G	LASIS	2022.02.17 / Seq-10	31	0.108	0.70799	0.00051	0.04228	0.00051					NIST-614	2022.07.07 / Seq-2	LASIS	0.35	0.03	0.96	0.13
	NIST614-G	LASIS	2022.02.17 / Seq-10	30.9	0.109	0.70828	0.00056	0.04257	0.00051					NIST-614	2022.07.07 / Seq-2	LASIS	0.34	0.03	1.02	0.13
	NIST614-G	LASIS	2022.02.17 / Seq-10	31	0.111	0.70818	0.00051	0.04196	0.00047					NIST-614	2022.07.07 / Seq-2	LASIS	0.33	0.03	0.95	0.13
	NIST614-G	LASIS	2022.02.17 / Seq-10	31	0.109	0.70826	0.00056	0.04221	0.00035					NIST-614	2022.07.07 / Seq-2	LASIS	0.35	0.04	1.07	0.14
	NIST614-G	LASIS	2022.02.17 / Seq-10	24.3	0.101	0.7085	0.00061	0.04269	0.00038					NIST-614	2022.07.07 / Seq-2	LASIS	0.33	0.03	1.01	0.14
	NIST614-G	LASIS	2022.02.17 / Seq-10	31	0.109	0.70818	0.00043	0.0411	0.00038					NIST-614	2022.07.08 / Seq-2	LASIS	0.36	0.04	1.01	0.14
	NIST614-G	LASIS	2022.02.17 / Seq-10	31	0.109	0.70825	0.00065	0.04139	0.00037					NIST-614	2022.07.08 / Seq-2	LASIS	0.33	0.03	1.02	0.13
	NIST614-G	LASIS	2022.02.17 / Seq-10	31	0.109	0.70824	0.0005	0.04174	0.00034					NIST-614	2022.07.08 / Seq-2	LASIS	0.36	0.03	0.95	0.13
	NIST614-G	LASIS	2022.02.17 / Seq-10	27	0.104	0.70885	0.00059	0.0418	0.00037					NIST-614	2022.07.08 / Seq-2	LASIS	0.32	0.03	1	0.13
	NIST614-G	LASIS	2022.02.17 / Seq-10	31	0.109	0.70883	0.00046	0.04169	0.00041					NIST-614	2022.07.08 / Seq-2	LASIS	0.33	0.03	1.02	0.13
	NIST614-G	LASIS	2022.02.17 / Seq-10	31	0.108	0.70887	0.00049	0.04185	0.0004					NIST-614	2022.07.08 / Seq-2	LASIS	0.34	0.03	1	0.13
	NIST614-G	LASIS	2022.02.17 / Seq-10	30.9	0.108	0.70828	0.00061	0.04174	0.00045					NIST-614	2022.07.08 / Seq-2	LASIS	0.35	0.04	1	0.13
	NIST614-G	LASIS	2022.02.17 / Seq-10	31	0.109	0.70893	0.00058	0.0417	0.00048					NIST-614	2022.07.08 / Seq-2	LASIS	0.34	0.03	1	0.13
	NIST614-G	LASIS	2022.02.17 / Seq-10	31	0.108	0.70903	0.00048	0.04186	0.00041					NIST-614	2022.05.06 / Seq-3a	LASS	0.34	0.06	1.05	0.22
	NIST614-G	LASIS	2022.06.29 / Seq-2	33.7	0.133	0.7079	0.00063	0.04666	0.00025					NIST-614	2022.05.06 / Seq-3a	LASS	0.33	0.05	0.96	0.17
	NIST614-G	LASIS	2022.06.29 / Seq-2	36	0.131	0.70802	0.00048	0.04672	0.0003					NIST-614	2022.05.06 / Seq-3a	LASS	0.34	0.05	1	0.19
	NIST614-G	LASIS	2022.06.29 / Seq-2	36	0.131	0.70821	0.00043	0.04633	0.00023					NIST-614	2022.05.06 / Seq-3a	LASS	0.35	0.06	1.08	0.18
	NIST614-G	LASIS	2022.06.29 / Seq-2	31	0.136	0.70817	0.00055	0.04605	0.00025					NIST-614	2022.05.06 / Seq-3a	LASS	0.33	0.05	0.96	0.18
	NIST614-G	LASIS	2022.06.29 / Seq-2	23.4	0.144	0.70856	0.0006	0.04566	0.00021					NIST-614	2022.05.06 / Seq-3a	LASS	0.35	0.06	1.03	0.19
	NIST614-G	LASIS	2022.06.29 / Seq-2	35.5	0.129	0.70795	0.00055	0.04591	0.00024					NIST-614	2022.05.06 / Seq-3b	LASS			1.02	0.18
	NIST614-G	LASIS	2022.06.29 / Seq-2	36	0.125	0.70823	0.00049	0.04591	0.00023					NIST-614	2022.05.06 / Seq-3b	LASS	0.33	0.05	0.98	0.19
	NIST614-G	LASIS	2022.06.29 / Seq-2	36	0.124	0.70847	0.0005	0.04591	0.00022					NIST-614	2022.05.06 / Seq-3b	LASS	0.32	0.05	0.97	0.18
	NIST614-G	LASIS	2022.06.29 / Seq-2	30.4	0.121	0.70804	0.00046	0.04572	0.00024					NIST-614	2022.05.06 / Seq-3b	LASS	0.34	0.06	1.04	0.17
	NIST614-G	LASIS	2022.06.29 / Seq-2	35.8	0.124	0.70791	0.00043	0.04578	0.00024					NIST-614	2022.05.06 / Seq-3b	LASS	0.32	0.05	0.99	0.18
	NIST614-G	LASIS	2022.06.29 / Seq-3	35.9	0.123	0.70787	0.00049	0.04726	0.00026					NIST-614	2022.05.06 / Seq-3b	LASS	0.33	0.05	1	0.18
	NIST614-G	LASIS	2022.06.29 / Seq-3	36	0.123	0.70805	0.00044	0.04681	0.00025					NIST-614	2022.09.09 / Seq-2	LASS	0.34	0.03	1.05	0.13
	NIST614-G	LASIS	2022.06.29 / Seq-3	36	0.124	0.70808	0.00053	0.04659	0.00025					NIST-614	2022.09.09 / Seq-2	LASS	0.32	0.03	0.98	0.13
	NIST614-G	LASIS	2022.06.29 / Seq-3	36	0.123	0.70807	0.00059	0.04759	0.00025					NIST-614	2022.09.09 / Seq-2	LASS	0.34	0.03	1.08	0.13
	NIST614-G	LASIS	2022.06.29 / Seq-3	36	0.123	0.708	0.00038	0.0481	0.00023					NIST-614	2022.09.09 / Seq-2	LASS	0.34	0.03	1.03	0.13
	NIST614-G	LASIS	2022.06.29 / Seq-3	36	0.121	0.70809	0.00045	0.04702	0.00022					NIST-614	2022.09.09 / Seq-2	LASS	0.32	0.03	1.02	0.13
	NIST614-G	LASIS	2022.06.29 / Seq-3	36	0.122	0.70825	0.00053	0.04719	0.00025					NIST-614	2022.09.09 / Seq-2	LASS	0.33	0.03	1.05	0.13
	NIST614-G	LASIS	2022.06.29 / Seq-3	36	0.122	0.70796	0.00052	0.04705	0.00025					NIST-614	2022.09.09 / Seq-2	LASS	0.33	0.03	1	0.13
	NIST614-G	LASIS	2022.06.29 / Seq-3	32.5	0.116	0.7078	0.00058	0.04785	0.00027					NIST-614	2022.09.09 / Seq-2	LASS	0.34	0.03	1.01	0.12
	NIST614-G	LASIS	2022.06.29 / Seq-3	36	0.121	0.70803	0.00046	0.04796	0.0002					NIST-614	2022.09.09 / Seq-2	LASS	0.33	0.02	0.97	0.12
	NIST614-G	LASIS	2022.06.29 / Seq-4	34.1	0.123	0.70789	0.00046	0.04722	0.00022					NIST-614	2022.09.09 / Seq-3	LASS	0.34	0.03	1	0.12
	NIST614-G	LASIS	2022.06.29 / Seq-4	34.4	0.121	0.7077	0.00063	0.04722	0.00022					NIST-614	2022.09.09 / Seq-3	LASS	0.34	0.03	1.03	0.13
	NIST614-G	LASIS	2022.06.29 / Seq-4	36	0.12	0.70843	0.00052	0.04668	0.00017					NIST-614	2022.09.09 / Seq-3	LASS	0.33	0.03	1.03	0.12
	NIST614-G	LASIS	2022.06.29 / Seq-4	35.9	0.118	0.70825	0.00057	0.04718	0.00022					NIST-614	2022.09.09 / Seq-3	LASS	0.34	0.03	1.01	0.12
	NIST614-G	LASIS	2022.06.29 / Seq-4	36	0.118	0.70805	0.00043	0.04779	0.00022					NIST-614	2022.09.09 / Seq-3	LASS	0.34	0.03	0.98	0.12
	NIST614-G	LASIS	2022.06.29 / Seq-4	32.4	0.123	0.7079	0.00056	0.04748	0.00019					NIST-614	2022.09.09 / Seq-3	LASS	0.32	0.03	1.07	0.13
	NIST614-G	LASIS	2022.06.29 / Seq-4	36	0.119	0.70801	0.00043	0.04758	0.00026					NIST-614	2022.09.09 / Seq-3	LASS	0.33	0.03	1.05	0.13
	NIST614-G	LASS	2022.05.06 / Seq-3a	25.8	0.138	0.70835	0.00068	0.04511	0.00043					NIST-614	2022.09.09 / Seq-3	LASS	0.34	0.03	1.02	0.12
	NIST614-G	LASS	2022.05.06 / Seq-3a	22.8	0.147	0.7079	0.00077	0.0447	0.00037					NIST-614	2022.09.09 / Seq-3	LASS	0.34	0.03	1	0.12
	NIST614-G	LASS	2022.05.06 / Seq-3a	19.6	0.158	0.70831	0.00061	0.04407	0.00034					NIST-614	2023.01.27 / Seq-3	LASS	0.35	0.02	1	0.12
	NIST614-G	LASS	2022.05.06 / Seq-3a	26	0.147	0.70819	0.00055	0.04391	0.00037					NIST-614	2023.01.27 / Seq-3	LASS	0.34	0.03	1.01	0.12
	NIST614-G	LASS	2022.05.06 / Seq-3a	25.8	0.143	0.70793	0.0007	0.04367	0.00036					NIST-614	2023.01.27 / Seq-3	LASS	0.35	0.02	1.03	0.12
	NIST614-G	LASS	2022.05.06 / Seq-3a	21.3	0.157	0.70832	0.00078	0.04352	0.0004					NIST-614	2023.01.27 / Seq-3	LASS	0.34	0.02	0.99	0.12
	NIST614-G	LASS	2022.05.06 / Seq-3b	26	0.145	0.70845	0.00069	0.04413	0.00029					NIST-614	2023.01.27 / Seq-3	LASS	0.35	0.03	0.98	0.12
	NIST614-G	LASS	2022.05.06 / Seq-3b	26	0.146	0.7082	0.0007	0.04403	0.00033					NIST-614	2023.01.27 / Seq-3	LASS	0.34	0.02	1.02	0.12
	NIST614-G	LASS	2022.05.06 / Seq-3b	26	0.147	0.70848	0.00066	0.04357	0.0003					NIST-614	2023.01.27 / Seq-3	LASS	0.32	0.02	0.96	0.11
	NIST614-G	LASS	2022.05.06 / Seq-3b	26	0.145	0.70838	0.00062	0.04379	0.00037					NIST-614	2023.01.27 / Seq-3	LASS	0.34	0.02	0.97	0.11
	NIST614-G	LASS	2022.05.06 / Seq-3b	26	0.145	0.70822	0.00054	0.04392	0.00034					NIST-614	2023.01.27 / Seq-3	LASS	0.34	0.03	0.99	0.12
	NIST614-G	LASS	2022.05.06 / Seq-3b	26	0.142	0.70819	0.00059	0.04404	0.00034					NIST-614	2023.01.27 / Seq-4	LASS	0.34	0.03	1.04	0.12
	NIST614-G	LASS	2022.09.09 / Seq-2	36	0.129	0.70839	0.00051	0.04549	0.00047					NIST-614	2023.01.27 / Seq-4	LASS	0.35	0.03	1.03	0.12
	NIST614-G	LASS	2022.09.09 / Seq-2	36	0.128	0.7084	0.00066	0.0425	0.00044					NIST-614	2023.01.27 / Seq-4	LASS	0.33	0.03	1.03	0.12
	NIST614-G	LASS	2022.09.09 / Seq-2	36	0.128	0.70797	0.00049	0.04241	0.00039					NIST-614	2023.01.27 / Seq-4	LASS	0.33	0.02	1.03	0.12
	NIST614-G	LASS	2022.09.09 / Seq-2	36	0.126	0.70794	0.00068	0.04192	0.00041					NIST-614	2023.01.27 / Seq-4	LASS	0.35	0.03	1	0.11
	NIST614-G	LASS	2022.09.09 / Seq-2	36	0.126	0.70793	0.0005	0.0425	0.0004					NIST-614	2023.01.27 / Seq-4	LASS	0.33	0.02	1.01	0.12
	NIST614-G	LASS	2022.09.09 / Seq-2	36	0.126	0.70793	0.00055	0.04461	0.00042					NIST-614	2023.01.27 / Seq-4	LASS	0.34	0.02	1	0.11
	NIST614-G	LASS	2022.09.09 / Seq-2	36	0.126	0.70802	0.00048	0.04214	0.00036					NIST-614	2023.01.27 / Seq-4	LASS	0.32	0.02	1	0.12
	NIST614-G	LASS	2022.09.09 / Seq-2	36	0.125	0.7079	0.00041	0.03971	0.00033					NIST-614	2023.01.27 / Seq-4	LASS	0.33	0.03	0.96	0.11
	NIST614-G	LASS	2022.09.09 / Seq-2	36	0.126	0.7079	0.00051	0.03922	0.00039					NIST-614	2023.01.27 / Seq-4	LASS	0.34	0.02	0.99	0.12
	NIST614-G	LASS	2022.09.09 / Seq-3	36	0.132	0.70766	0.00045	0.04353	0.00055					NIST-614	2023.11.08 / Seq-2	LASS	0.333638	0.02	1.01526	0.12
	NIST614-G	LASS	2022.09.09 / Seq-3	36	0.131	0.70826	0.00056	0.04285	0.00038					NIST-614	2023.11.08 / Seq-2	LASS	0.335989	0.02	1.01278	0.11
	NIST614-G	LASS	2022.09.09 / Seq-3	36	0.131	0.70821	0.00064	0.04283	0.00039					NIST-614	2023.11.08 / Seq-2	LASS	0.341849	0.02	1.04957	0.12
	NIST614-G	LASS	2022.09.09 / Seq-3	36	0.13	0.70797	0.00061	0.04263	0.0004					NIST-614	2023.11.08 / Seq-2	LASS	0.335051	0.02	1.03549	0.12
	NIST614-G	LASS	2022.09.09 / Seq-3	36	0.132	0.70798	0.00047	0.0424	0.00031					NIST-614	2023.11.08 / Seq-2	LASS	0.34179	0.02	1.05065	0.12
	NIST614-G	LASS	2022.09.09 / Seq-3	36	0.129	0.70806	0.00055	0.04287	0.00039					NIST-614	2023.11.08 / Seq-2	LASS	0.327363	0.02	1.01533	0.12
	NIST614-G	LASS	2022.09.09 / Seq-3	36	0.133	0.70807	0.00048	0.04203	0.00034					NIST-614	2023.11.08 / Seq-2	LASS	0.344223	0.02	1.03399	0.12
	NIST614-G	LASS	2022.09.09 / Seq-3	36	0.131	0.70763	0.00062	0.04359	0.00038					NIST-614	2023.11.08 / Seq-2	LASS	0.333614	0.02	1.06222	0.12
	NIST614-G	LASS	2022.09.09 / Seq-3	36	0.134	0.70812	0.00071	0.04298	0.00033					NIST-614	2023.11.08 / Seq-2	LASS	0.336745	0.02	1.03106	0.12
	NIST614-G	LASS	2023.01.27 / Seq-3	35	0.121	0.70793	0.00058	0.04473	0.00014					NIST-614	2023.11.08 / Seq-2	LASS	0.342599	0.02	1.02679	0.12
	NIST614-G	LASS	2023.01.27 / Seq-3	33.6	0.119	0.70789	0.00046	0.04466	0.00023					NIST-614	2023.11.08 / Seq-2	LASS	0.337741	0.02	1.03943	0.12
	NIST614-G	LASS	2023.01.27 / Seq-3	26.7	0.131	0.70821	0.00056	0.04458	0.0002					NIST-614	2023.11.08 / Seq-2	LASS	0.340672	0.02	1.05368	0.12
	NIST614-G	LASS	2023.01.27 / Seq-3	35	0.121	0.70842	0.00053	0.04492	0.00018					NIST-614	2023.11.08 / Seq-2	LASS	0.326129	0.02	0.993988	0.11
	NIST614-G	LASS	2023.01.27 / Seq-3	35	0.123	0.70833	0.00054	0.04447	0.00026					NIST-614	2023.11.09 / Seq-2	LASS	0.321282	0.02	0.952832	0.11
	NIST614-G	LASS	2023.01.27 / Seq-3	35	0.121	0.70803	0.00063	0.04551	0.0002					NIST-614	2023.11.09 / Seq-2	LASS	0.331607	0.02	0.999858	0.11
	NIST614-G	LASS	2023.01.27 / Seq-3	26.1	0.133	0.70793	0.00071	0.04405	0.00028					NIST-614	2023.11.09 / Seq-2	LASS	0.338663	0.02	1.00791	0.12
	NIST614-G	LASS	2023.01.27 / Seq-3	32.3	0.123	0.70817	0.00051	0.04544	0.00022					NIST-614	2023.11.09 / Seq-2	LASS	0.351496	0.02	0.996076	0.11
	NIST614-G	LASS	2023.01.27 / Seq-3	35	0.119	0.70801	0.00044	0.04529	0.00018					NIST-614	2023.11.09 / Seq-2	LASS	0.33207	0.02	0.973437	0.11
	NIST614-G	LASS	2023.01.27 / Seq-3	35	0.12	0.70811	0.00064	0.04561	0.00022					NIST-614	2023.11.09 / Seq-2	LASS	0.330311	0.02	0.98031	0.11
	NIST614-G	LASS	2023.01.27 / Seq-4	35	0.118	0.70838	0.00059	0.04421	0.00014					NIST-614	2023.11.09 / Seq-2	LASS	0.318256	0.02	1.01164	0.11
	NIST614-G	LASS	2023.01.27 / Seq-4	31.4	0.122	0.70826	0.00055	0.04392	0.00022					NIST-614	2023.11.09 / Seq-2	LASS	0.344222	0.02	0.971699	0.11
	NIST614-G	LASS	2023.01.27 / Seq-4	23.5	0.136	0.70816	0.00065	0.04379	0.00018					NIST-614	2023.11.09 / Seq-2	LASS	0.347452	0.03	0.976752	0.11
	NIST614-G	LASS	2023.01.27 / Seq-4	35	0.116	0.70839	0.00054	0.04419	0.00021					NIST-614	2023.11.09 / Seq-2	LASS	0.336724	0.03	1.00256	0.12
	NIST614-G	LASS	2023.01.27 / Seq-4	21.3	0.14	0.70774	0.00065	0.04403	0.00021					NIST-614	2023.11.09 / Seq-2	LASS	0.332555	0.02	1.02427	0.12
	NIST614-G	LASS	2023.01.27 / Seq-4	23.9	0.136	0.70769	0.00078	0.04421	0.00021					NIST-614	2023.11.09 / Seq-2	LASS	0.357006	0.03	0.99878	0.11
	NIST614-G	LASS	2023.01.27 / Seq-4	21.2	0.137	0.70811	0.00078	0.04426	0.0002					NIST-614	2023.11.09 / Seq-2	LASS	0.346712	0.03	0.988844	0.11
	NIST614-G	LASS	2023.01.27 / Seq-4	35.1	0.118	0.70799	0.00043	0.04455	0.00018					NIST-614	2023.11.10 / Seq-2	LASS	0.345431	0.02	0.975312	0.11
	NIST614-G	LASS	2023.01.27 / Seq-4	35	0.119	0.70821	0.00049	0.04453	0.0002					NIST-614	2023.11.10 / Seq-2	LASS	0.338462	0.03	0.984703	0.11
	NIST614-G	LASS	2023.01.27 / Seq-4	35	0.117	0.70839	0.00059	0.04474	0.00017					NIST-614	2023.11.10 / Seq-2	LASS	0.340168	0.02	0.987069	0.11
	NIST614	LASS	2023.11.08 / Seq-2	36.004	0.102759	0.708079	0.000703835	0.0458249	0.000459128					NIST-614	2023.11.10 / Seq-2	LASS	0.336069	0.02	1.00947	0.12
	NIST614	LASS	2023.11.08 / Seq-2	36.006	0.101201	0.708049	0.000639518	0.0457327	0.000484641					NIST-614	2023.11.10 / Seq-2	LASS	0.338175	0.02	0.99138	0.11
	NIST614	LASS	2023.11.08 / Seq-2	36.005	0.103775	0.708377	0.000590438	0.0451956	0.000406738					NIST-614	2023.11.10 / Seq-2	LASS	0.342698	0.03	0.976816	0.11
	NIST614	LASS	2023.11.08 / Seq-2	36.004	0.105227	0.708189	0.000588627	0.0455571	0.000426687					NIST-614	2023.11.10 / Seq-2	LASS	0.328233	0.02	0.985948	0.11
	NIST614	LASS	2023.11.08 / Seq-2	30.0689	0.0935866	0.708433	0.000754379	0.0461403	0.000356735					NIST-614	2023.11.10 / Seq-2	LASS	0.328952	0.02	0.987504	0.11
	NIST614	LASS	2023.11.08 / Seq-2	36.006	0.105075	0.708495	0.000435861	0.0454566	0.000421184					NIST-614	2023.11.10 / Seq-2	LASS	0.325379	0.02	1.00447	0.11
	NIST614	LASS	2023.11.08 / Seq-2	36.004	0.107749	0.708357	0.000498758	0.0453059	0.000421108					NIST-614	2023.11.10 / Seq-2	LASS	0.32345	0.02	0.982186	0.11
	NIST614	LASS	2023.11.08 / Seq-2	33.6555	0.109048	0.708778	0.000727114	0.0454907	0.000378345
	NIST614	LASS	2023.11.08 / Seq-2	36.004	0.105165	0.708391	0.000585908	0.0452658	0.000321534
	NIST614	LASS	2023.11.08 / Seq-2	36.006	0.105137	0.70838	0.000539984	0.0450215	0.000407					GSD-1G	2022.02.21 / Seq-1	LASIS	0.8	0.05	1.05	0.12
	NIST614	LASS	2023.11.08 / Seq-2	36.008	0.103084	0.708882	0.00066884	0.045138	0.000393934					GSD-1G	2022.02.21 / Seq-1	LASIS	0.8	0.05	1.04	0.12
	NIST614	LASS	2023.11.08 / Seq-2	36.008	0.104166	0.708286	0.000585694	0.0450378	0.000380933					GSD-1G	2022.02.21 / Seq-1	LASIS	0.81	0.05	1.04	0.12
	NIST614	LASS	2023.11.08 / Seq-2	36.003	0.104655	0.708481	0.000451065	0.0449719	0.000396612					GSD-1G	2022.02.21 / Seq-1	LASIS	0.79	0.05	1.05	0.12
	NIST614	LASS	2023.11.09 / Seq-2	36.006	0.101974	0.708492	0.000561802	0.0457565	0.00047925					GSD-1G	2022.02.21 / Seq-1	LASIS	0.78	0.05	1.05	0.12
	NIST614	LASS	2023.11.09 / Seq-2	36.004	0.10387	0.708427	0.000688362	0.0455809	0.000461962					GSD-1G	2022.02.21 / Seq-1	LASIS	0.8	0.05	1.05	0.12
	NIST614	LASS	2023.11.09 / Seq-2	36.003	0.102177	0.708461	0.000592062	0.0454271	0.000411476					GSD-1G	2022.02.21 / Seq-1	LASIS	0.79	0.05	1.03	0.12
	NIST614	LASS	2023.11.09 / Seq-2	36.004	0.103015	0.708708	0.000522261	0.04509	0.00044184					GSD-1G	2022.02.21 / Seq-1	LASIS	0.78	0.05	1.03	0.12
	NIST614	LASS	2023.11.09 / Seq-2	36.006	0.103279	0.708811	0.000516822	0.0449153	0.000361583					GSD-1G	2022.02.21 / Seq-1	LASIS	0.79	0.05	1.03	0.12
	NIST614	LASS	2023.11.09 / Seq-2	36.016	0.104523	0.708538	0.000614054	0.0448872	0.000324306					GSD-1G	2022.02.21 / Seq-1	LASIS	0.78	0.05	1.03	0.12
	NIST614	LASS	2023.11.09 / Seq-2	36.004	0.101375	0.708676	0.000556778	0.0448754	0.000393723					GSD-1G	2022.02.21 / Seq-1	LASIS	0.8	0.05	1.04	0.12
	NIST614	LASS	2023.11.09 / Seq-2	36.006	0.103003	0.708364	0.000678917	0.0454106	0.000410099					GSD-1G	2022.02.21 / Seq-1	LASIS	0.81	0.05	1.06	0.12
	NIST614	LASS	2023.11.09 / Seq-2	36.006	0.0991017	0.708652	0.000526572	0.0460755	0.000388433					GSD-1G	2022.02.21 / Seq-1	LASIS	0.79	0.05	1.05	0.12
	NIST614	LASS	2023.11.09 / Seq-2	36.02	0.0977482	0.708332	0.000640727	0.0450996	0.000367599					GSD-1G	2022.02.21 / Seq-1	LASIS	0.77	0.05	1.04	0.12
	NIST614	LASS	2023.11.09 / Seq-2	32.6585	0.095285	0.708771	0.000798337	0.0451017	0.000347425					GSD-1G	2022.02.21 / Seq-1	LASIS	0.8	0.05	1.04	0.12
	NIST614	LASS	2023.11.09 / Seq-2	36.006	0.102764	0.708365	0.000480187	0.0447912	0.000353758					GSD-1G	2022.02.21 / Seq-1	LASIS	0.8	0.05	1.06	0.12
	NIST614	LASS	2023.11.09 / Seq-2	36.004	0.103786	0.708924	0.000687768	0.0449576	0.00038888					GSD-1G	2022.02.21 / Seq-1	LASIS	0.82	0.05	1.03	0.12
	NIST614	LASS	2023.11.10 / Seq-2	36.009	0.100643	0.708121	0.000718848	0.0458119	0.000481757					GSD-1G	2022.02.21 / Seq-1	LASIS	0.79	0.05	1.04	0.12
	NIST614	LASS	2023.11.10 / Seq-2	36.004	0.100175	0.708275	0.000761478	0.0457725	0.000433896					GSD-1G	2022.02.21 / Seq-1	LASIS	0.78	0.05	1.05	0.12
	NIST614	LASS	2023.11.10 / Seq-2	36.007	0.0994805	0.708369	0.000840372	0.0456668	0.000440376					GSD-1G	2022.02.21 / Seq-1	LASIS	0.8	0.05	1.04	0.12
	NIST614	LASS	2023.11.10 / Seq-2	36.004	0.102283	0.708491	0.000699347	0.0453019	0.000431566					GSD-1G	2022.02.21 / Seq-1	LASIS	0.8	0.05	1.06	0.12
	NIST614	LASS	2023.11.10 / Seq-2	36.004	0.101089	0.708731	0.000899028	0.0452376	0.000432788					GSD-1G	2022.06.30 / Seq-2	LASIS	0.79	0.06	1.07	0.12
	NIST614	LASS	2023.11.10 / Seq-2	36.007	0.103088	0.708263	0.000684262	0.0450117	0.000389474					GSD-1G	2022.06.30 / Seq-2	LASIS	0.79	0.05	1.04	0.12
	NIST614	LASS	2023.11.10 / Seq-2	36.004	0.101544	0.708657	0.00081638	0.0454472	0.00046177					GSD-1G	2022.06.30 / Seq-2	LASIS	0.79	0.06	1.04	0.12
	NIST614	LASS	2023.11.10 / Seq-2	36.006	0.101343	0.708359	0.000773658	0.0450211	0.000331823					GSD-1G	2022.06.30 / Seq-2	LASIS	0.79	0.05	1.05	0.12
	NIST614	LASS	2023.11.10 / Seq-2	36.004	0.102168	0.708326	0.000650751	0.0447642	0.000376131					GSD-1G	2022.06.30 / Seq-2	LASIS	0.78	0.06	1.04	0.12
	NIST614	LASS	2023.11.10 / Seq-2	36.004	0.101311	0.708591	0.000738015	0.0450112	0.000403414					GSD-1G	2022.06.30 / Seq-2	LASIS	0.78	0.05	1.03	0.12
				32.329	AVG	0.708254								GSD-1G	2022.06.30 / Seq-2	LASIS	0.78	0.05	1.05	0.12
					2STD	0.000559729								GSD-1G	2022.06.30 / Seq-2	LASIS	0.79	0.06	1.06	0.12
														GSD-1G	2022.06.30 / Seq-2	LASIS	0.77	0.05	1.04	0.12
														GSD-1G	2022.07.07 / Seq-2	LASIS	0.8	0.06	1.05	0.12
														GSD-1G	2022.07.07 / Seq-2	LASIS	0.8	0.05	1.05	0.12
														GSD-1G	2022.07.07 / Seq-2	LASIS	0.79	0.05	1.07	0.12
														GSD-1G	2022.07.07 / Seq-2	LASIS	0.8	0.06	1.06	0.12
														GSD-1G	2022.07.07 / Seq-2	LASIS	0.79	0.06	1.04	0.12
														GSD-1G	2022.07.07 / Seq-2	LASIS	0.8	0.06	1.06	0.12
														GSD-1G	2022.07.07 / Seq-2	LASIS	0.79	0.05	1.05	0.12
														GSD-1G	2022.07.07 / Seq-2	LASIS	0.79	0.05	1.05	0.12
														GSD-1G	2022.07.07 / Seq-2	LASIS	0.78	0.05	1.03	0.12
														GSD-1G	2022.07.07 / Seq-2	LASIS	0.8	0.06	1.06	0.12
														GSD-1G	2022.07.08 / Seq-2	LASIS	0.82	0.06	1.06	0.12
														GSD-1G	2022.07.08 / Seq-2	LASIS	0.82	0.06	1.06	0.12
														GSD-1G	2022.07.08 / Seq-2	LASIS	0.82	0.06	1.05	0.12
														GSD-1G	2022.07.08 / Seq-2	LASIS	0.8	0.06	1.03	0.11
														GSD-1G	2022.07.08 / Seq-2	LASIS	0.81	0.06	1.06	0.12
														GSD-1G	2022.07.08 / Seq-2	LASIS	0.81	0.06	1.06	0.12
														GSD-1G	2022.07.08 / Seq-2	LASIS	0.79	0.06	1.04	0.11
														GSD-1G	2022.07.08 / Seq-2	LASIS	0.78	0.06	1.04	0.12
														GSD-1G	2022.05.06 / Seq-3a	LASS	0.8	0.1	1.05	0.15
														GSD-1G	2022.05.06 / Seq-3a	LASS	0.82	0.1	1.07	0.17
														GSD-1G	2022.05.06 / Seq-3a	LASS	0.79	0.09	1.06	0.16
														GSD-1G	2022.05.06 / Seq-3a	LASS	0.82	0.09	1.02	0.15
														GSD-1G	2022.05.06 / Seq-3a	LASS	0.82	0.11	1.03	0.16
														GSD-1G	2022.05.06 / Seq-3a	LASS	0.82	0.1	1.04	0.17
														GSD-1G	2022.05.06 / Seq-3a	LASS	0.82	0.1	1.04	0.15
														GSD-1G	2022.05.06 / Seq-3a	LASS	0.83	0.11	1.03	0.16
														GSD-1G	2022.05.06 / Seq-3b	LASS	0.82	0.1	1.03	0.16
														GSD-1G	2022.05.06 / Seq-3b	LASS	0.8	0.09	1.04	0.16
														GSD-1G	2022.05.06 / Seq-3b	LASS	0.79	0.1	1.02	0.17
														GSD-1G	2022.05.06 / Seq-3b	LASS	0.84	0.1	1.04	0.16
														GSD-1G	2022.05.06 / Seq-3b	LASS	0.79	0.1	1.05	0.16
														GSD-1G	2022.05.06 / Seq-3b	LASS	0.81	0.12	1.05	0.18
														GSD-1G	2022.05.06 / Seq-3b	LASS	0.8	0.12	1.02	0.18
														GSD-1G	2022.05.06 / Seq-3b	LASS	0.81	0.11	1.04	0.17
														GSD-1G	2022.09.09 / Seq-2	LASS	0.79	0.05	1.04	0.11
														GSD-1G	2022.09.09 / Seq-2	LASS	0.81	0.05	1.05	0.11
														GSD-1G	2022.09.09 / Seq-2	LASS	0.8	0.05	1.04	0.11
														GSD-1G	2022.09.09 / Seq-2	LASS	0.8	0.04	1.04	0.11
														GSD-1G	2022.09.09 / Seq-2	LASS	0.8	0.05	1.01	0.11
														GSD-1G	2022.09.09 / Seq-2	LASS	0.8	0.05	1.02	0.11
														GSD-1G	2022.09.09 / Seq-2	LASS	0.79	0.04	1.03	0.11
														GSD-1G	2022.09.09 / Seq-2	LASS	0.8	0.05	1.01	0.11
														GSD-1G	2022.09.09 / Seq-3	LASS	0.8	0.05	1.04	0.11
														GSD-1G	2022.09.09 / Seq-3	LASS	0.78	0.05	1.05	0.11
														GSD-1G	2022.09.09 / Seq-3	LASS	0.81	0.05	1.05	0.11
														GSD-1G	2022.09.09 / Seq-3	LASS	0.8	0.05	1.03	0.11
														GSD-1G	2022.09.09 / Seq-3	LASS	0.81	0.05	1.04	0.11
														GSD-1G	2022.09.09 / Seq-3	LASS	0.82	0.05	1.04	0.11
														GSD-1G	2022.09.09 / Seq-3	LASS	0.8	0.05	1.02	0.11
														GSD-1G	2022.09.09 / Seq-3	LASS	0.79	0.04	1.01	0.11
														GSD-1G	2022.11.22 / Seq-1	LASS	0.8	0.05	1.04	0.12
														GSD-1G	2022.11.22 / Seq-1	LASS	0.79	0.05	1.05	0.12
														GSD-1G	2022.11.22 / Seq-1	LASS	0.8	0.05	1.04	0.12
														GSD-1G	2022.11.22 / Seq-1	LASS	0.81	0.05	1.04	0.12
														GSD-1G	2022.11.22 / Seq-1	LASS	0.81	0.05	1.05	0.12
														GSD-1G	2022.11.22 / Seq-1	LASS	0.78	0.05	1.01	0.11
														GSD-1G	2022.11.22 / Seq-1	LASS	0.79	0.05	1.04	0.12
														GSD-1G	2022.11.22 / Seq-1	LASS	0.79	0.05	1.04	0.12
														GSD-1G	2023.01.27 / Seq-3	LASS	0.79	0.04	1	0.11
														GSD-1G	2023.01.27 / Seq-3	LASS	0.8	0.04	1.01	0.11
														GSD-1G	2023.01.27 / Seq-3	LASS	0.8	0.04	1.03	0.11
														GSD-1G	2023.01.27 / Seq-3	LASS	0.78	0.04	1.02	0.11
														GSD-1G	2023.01.27 / Seq-3	LASS	0.81	0.04	1.02	0.11
														GSD-1G	2023.01.27 / Seq-3	LASS	0.79	0.04	1	0.11
														GSD-1G	2023.01.27 / Seq-3	LASS	0.78	0.04	0.99	0.11
														GSD-1G	2023.01.27 / Seq-3	LASS	0.8	0.05	1.01	0.11
														GSD-1G	2023.01.27 / Seq-4	LASS	0.79	0.04	0.98	0.1
														GSD-1G	2023.01.27 / Seq-4	LASS	0.79	0.05	1.01	0.11
														GSD-1G	2023.01.27 / Seq-4	LASS	0.79	0.05	1.01	0.11
														GSD-1G	2023.01.27 / Seq-4	LASS	0.79	0.05	1.01	0.11
														GSD-1G	2023.01.27 / Seq-4	LASS	0.8	0.05	1.01	0.11
														GSD-1G	2023.01.27 / Seq-4	LASS	0.8	0.05	1.01	0.11
														GSD-1G	2023.01.27 / Seq-4	LASS	0.8	0.05	1.01	0.11
														GSD-1G	2023.01.27 / Seq-4	LASS	0.81	0.05	1.01	0.11
														GSD-1G	2023.11.08 / Seq-2	LASS	0.819494	0.05	1.04059	0.11
														GSD-1G	2023.11.08 / Seq-2	LASS	0.799946	0.04	1.00486	0.11
														GSD-1G	2023.11.08 / Seq-2	LASS	0.823754	0.04	1.03792	0.11
														GSD-1G	2023.11.08 / Seq-2	LASS	0.813676	0.05	1.04781	0.11
														GSD-1G	2023.11.08 / Seq-2	LASS	0.808496	0.04	1.01488	0.11
														GSD-1G	2023.11.08 / Seq-2	LASS	0.80742	0.04	1.00776	0.11
														GSD-1G	2023.11.08 / Seq-2	LASS	0.806604	0.04	0.999377	0.11
														GSD-1G	2023.11.08 / Seq-2	LASS	0.828794	0.05	1.00305	0.11
														GSD-1G	2023.11.08 / Seq-2	LASS	0.805733	0.05	0.998256	0.11
														GSD-1G	2023.11.08 / Seq-2	LASS	0.805213	0.05	1.0207	0.11
														GSD-1G	2023.11.08 / Seq-2	LASS	0.801121	0.04	0.991152	0.11
														GSD-1G	2023.11.09 / Seq-2	LASS	0.807039	0.04	1.0251	0.11
														GSD-1G	2023.11.09 / Seq-2	LASS	0.799661	0.04	1.03171	0.11
														GSD-1G	2023.11.09 / Seq-2	LASS	0.784858	0.04	1.01488	0.11
														GSD-1G	2023.11.09 / Seq-2	LASS	0.804856	0.04	1.02793	0.11
														GSD-1G	2023.11.09 / Seq-2	LASS	0.797155	0.04	1.02251	0.11
														GSD-1G	2023.11.09 / Seq-2	LASS	0.772212	0.04	0.995905	0.11
														GSD-1G	2023.11.09 / Seq-2	LASS	0.800747	0.04	1.03462	0.11
														GSD-1G	2023.11.09 / Seq-2	LASS	0.802749	0.05	1.01355	0.11
														GSD-1G	2023.11.09 / Seq-2	LASS	0.790487	0.04	0.998175	0.11
														GSD-1G	2023.11.09 / Seq-2	LASS	0.789614	0.04	1.01405	0.11
														GSD-1G	2023.11.09 / Seq-2	LASS	0.811208	0.05	1.02914	0.11
														GSD-1G	2023.11.10 / Seq-2	LASS	0.799477	0.04	1.03025	0.11
														GSD-1G	2023.11.10 / Seq-2	LASS	0.790603	0.04	1.00823	0.11
														GSD-1G	2023.11.10 / Seq-2	LASS	0.796344	0.04	0.990279	0.11
														GSD-1G	2023.11.10 / Seq-2	LASS	0.819411	0.05	1.02609	0.11
														GSD-1G	2023.11.10 / Seq-2	LASS	0.808824	0.04	1.02351	0.11
														GSD-1G	2023.11.10 / Seq-2	LASS	0.808721	0.05	1.003	0.11
														GSD-1G	2023.11.10 / Seq-2	LASS	0.799006	0.05	1.03576	0.11
														GSD-1G	2023.11.10 / Seq-2	LASS	0.798479	0.04	1.01728	0.11
														GSD-1G	2023.11.10 / Seq-2	LASS	0.809552	0.04	1.01271	0.11
														GSD-1G	2023.11.10 / Seq-2	LASS	0.803775	0.05	1.03556	0.11

## Sheet: Table 2
Table 2. Predicted errors or 87Sr/86Sr ratios of inclusions from errors of reference materials
Reference material	Time std	Sr ppm std	2std 87Sr/86Sr	avg Time inc	avg Sr ppm inc	predicted 2SE	actual avg 2SE
GOR128	29.4	30	0.00082	18	35.9	0.000957998
KL-2	33.3	356	0.00035	18	35.9	0.0014991
NIST 614	32	45.8	0.00055	18	35.9	0.000828299
AVG						0.00109513	0.001
				Hadean group
GOR128	29.4	30	0.00082	17.6	33.7	0.000999947
KL-2	32.1	356	0.00035	17.6	33.7	0.00153629
NIST 614	30.9	45.8	0.00055	17.6	33.7	0.000849578
AVG						0.00112861	0.001

## Sheet: Table 3a
Table 3a. Trace elements analytical details.
Protocol	Masses measured	Integration time per peak/dwell times	Total integration time (s)
28 elements	43 (Ca), 45 (Sc), 49 (Ti), 51 (V), 53 (Cr), 85 (Rb), 88 (Sr), 89 (Y), 90 (Zr), 93 (Nb), 137 (Ba), 139 (La), 140 (Ce), 141 (Pr), 146 (Nd), 147 (Sm), 153 (Eu), 157 (Gd), 159 (Tb), 163 (Dy), 166 (Er), 172 (Yb), 175 (Lu), 178 (Hf), 181 (Ta), 208 (Pb), 232 (Th), 238 (U)	10 ms for masses: 43, 49, 51, 88, 89, 90, 93, 137, 139, 140, 141, 146, 147, 143, 157, 159, 163, 166, 172, 175, 178, 181 30 ms for masses: 45, 53, 85, 232 50 ms for masses: 208, 238	0.51
22 elements	43 (Ca), 49 (Ti), 85 (Rb), 88 (Sr), 89 (Y), 90 (Zr), 93 (Nb), 137 (Ba), 139 (La), 140 (Ce), 141 (Pr), 146 (Nd), 147 (Sm), 153 (Eu), 157 (Gd), 159 (Tb), 163 (Dy), 166 (Er), 172 (Yb), 208 (Pb), 232 (Th), 238 (U)	30 ms for masses: 43, 49, 88, 89, 90, 137, 139, 141, 146, 147, 153, 157, 159, 163, 166, 172 40 ms for mass: 140 50 ms for masses: 85, 93 70 ms for masses: 232, 238 80 ms for mass: 208	0.87
17 elements	43 (Ca), 49 (Ti), 85 (Rb), 88 (Sr), 89 (Y), 90 (Zr), 93 (Nb), 137 (Ba), 139 (La), 140 (Ce), 146 (Nd), 147 (Sm), 163 (Dy), 172 (Yb), 208 (Pb), 232 (Th), 238 (U)	10 ms for masses: 43, 49, 89, 137 20 ms for masses: 88, 90, 139, 140, 146, 147, 163, 172 40 ms for mass: 93 50 ms for mass: 85 100 ms for masses: 208, 232, 238	0.62

## Sheet: Table 3b
Table 3b. Measured composition of melt inclusions and host olivines. Marked in green are new inclusions analysed
Comment	Host olivine Fo	2SE (abs)	SiO2	2SE (abs)	TiO2	2SE (abs)	Al2O3	2SE (abs)	FeO	2SE (abs)	MnO	2SE (abs)	MgO	2SE (abs)	CaO	2SE (abs)	Cr2O3	2SE (abs)	Na2O	2SE (abs)	K2O	2SE (abs)	Cl	2SE (abs)	P2O5	2SE (abs)	S	2SE (abs)	Total	T exp, oC	Size	H2O	2SD	Spot Size (µm)	Time (s)	Ti	2SE (abs)	Rb	2SE (abs)	Sr	2SE (abs)	Y	2SE (abs)	Zr	2SE (abs)	Nb	2SE (abs)	Ba	2SE (abs)
1521-43-ol1	95.0726	0.00402105	56.6077	0.0960665	0.2837	0.00975211	9.87468	0.0409664	3.62245	0.0231387	0.07605	0.00808539	17.9691	0.059295	7.9466	0.0245374	0.215021	0.0144239	0.84625	0.0261764	0.0392	0.00208544	0.0978217	0.00233817	0.0190976	0.00420111	0.02365	0.00180443	97.6908	1350	59 × 59	0.75	0.01
1521-44-ol3	95.1146	0.00406646	57.3875	0.133904	0.3033	0.0140933	10.6284	0.0595193	3.501	0.0322092	0.0807	0.0114594	16.3242	0.0794443	8.8304	0.036499	0.238674	0.0209397	0.874	0.0372324	0.0313	0.00287125	0.048619	0.00275507	0.0298389	0.00632186	0.0281	0.00254586	98.37	1350	59 × 59	0.51	0.01
1521-44-ol4	94.8586	0.00382428	56.7748	0.09635	0.2928	0.00982471	10.2193	0.0414299	3.7892	0.0235784	0.082	0.00813684	18.2072	0.0592224	8.214	0.0249759	0.256011	0.0148082	0.8352	0.0258696	0.03225	0.00203753	0.0533382	0.00199454	0.0301848	0.00442458	0.0319	0.00181751	98.8812	1350	51 × 51	0.92	0.02
1521-44-ol5	94.8586	0.00372395	55.7501	0.094611	0.2606	0.00909076	9.63035	0.0394962	4.90115	0.0300355	0.08455	0.00872703	18.0991	0.059724	7.64765	0.0230729	0.278016	0.0163888	1.00585	0.0302305	0.0301	0.00185205	0.0681108	0.00179643	0.026292	0.0047419	0.03065	0.00184727	97.8191	1350	59 × 55	0.58	0.03
1521-44-ol6	94.7078	0.00388428	56.6557	0.096148	0.30115	0.00993753	9.97648	0.0411515	3.74515	0.0233928	0.07285	0.00807422	17.9418	0.0592049	8.26865	0.0249464	0.244797	0.01488	0.8516	0.0260545	0.03485	0.00208313	0.0972896	0.00235564	0.0272821	0.00442703	0.0226	0.00175659	98.3067	1350	57 × 57	0.81	0.01
1521-45-ol100	94.7798	0.00248552	57.5048	0.0796809	0.346033	0.00850097	11.7277	0.0371659	3.409	0.0187634	0.0651	0.00656413	14.4905	0.0451769	9.51317	0.0219697	0.130567	0.0118298	1.01767	0.0239069	0.0333667	0.00167359	0.0504263	0.00160266	0.0311	0.00372659	0.0237	0.00157182	98.3664	1300	72 × 54	1.0212	0.01	20	13.871	2040.28	64.3087	0.60797	0.063648	36.7207	1.27365	9.02519	0.546251	15.9913	0.745177	0.559993	0.0737549	5.54094	0.93627
1521-45-ol101	94.6709	0.0301657	58.0328	0.0804126	0.3408	0.00846115	11.7079	0.0371032	3.35657	0.018561	0.0642333	0.00656809	14.5272	0.0452912	9.35077	0.0219546	0.1265	0.0115988	1.0372	0.024074	0.0374	0.00169251	0.100314	0.00193858	0.0329667	0.00368753	0.0289667	0.00158127	98.748	1300	47 × 43	0.9955	0.01	38	10.142	2041.87	84.9798	0.650883	0.0917623	37.1985	1.39061	9.31352	0.714072	16.692	0.846482	0.491776	0.065655	4.90662	1.03695
1521-45-ol102	94.1616	0.0057127	57.9471	0.0802939	0.354167	0.00852509	11.7815	0.0371846	3.70423	0.0193903	0.0741333	0.00656632	14.4794	0.0449595	9.44713	0.0219411	0.154133	0.0118621	1.03423	0.0241409	0.03	0.00166153	0.069371	0.00175545	0.0306333	0.00378332	0.032	0.00163689	99.1328	1300	30 × 30	1.19162	0.03
1521-45-ol103	94.8434	0.00893903	57.4071	0.0795456	0.351733	0.00858388	11.77	0.0373016	3.33733	0.0184977	0.0647333	0.00652789	14.0953	0.044494	9.62637	0.0221083	0.126433	0.0123332	1.03037	0.0240368	0.0337	0.00167889	0.0629734	0.00169456	0.0270333	0.00369859	0.0262	0.00157779	97.9738	1300	50 × 42	1.08655	0.03	38	10.739	1980.82	63.3097	0.530475	0.0550964	37.4076	1.0702	9.51151	0.59336	16.4226	0.737687	0.435608	0.0515243	4.49543	0.662115
1521-45-ol104	94.5754	0.00868645	57.5407	0.0976498	0.34045	0.0102656	11.8575	0.0458353	3.44395	0.0229726	0.0608	0.00806032	14.58	0.0553295	9.33135	0.0266139	0.1304	0.0139832	1.0462	0.0296202	0.03425	0.00204809	0.106466	0.00241426	0.02625	0.00450888	0.0263	0.00188234	98.5326	1300	39 × 34	0.954062	0.02
1521-45-ol105	95.2407	0.0160013	57.5589	0.0976808	0.3334	0.0103425	11.4428	0.0450422	3.1614	0.0221311	0.06305	0.00809834	14.2682	0.0548187	9.5972	0.027145	0.18055	0.0146029	0.9216	0.0280031	0.0273	0.00201587	0.060244	0.00204513	0.03305	0.00458228	0.0283	0.00192721	97.6898	1300	38 × 32	0.807739	0.02
1521-45-ol53	95.015	0.0201764	57.4639	0.0796243	0.355367	0.00860194	12.1135	0.0374559	3.29153	0.0182435	0.0578	0.00650065	13.6581	0.0434586	9.7098	0.0220501	0.113653	0.0118528	0.9761	0.0232184	0.0284	0.00164578	0.0572333	0.00164856	0.0316667	0.00367042	0.0321333	0.00160194	97.8913	1300	30 × 30	0.711298	0.03
1521-45-ol54	94.3824	0.0393369	57.3145	0.0794173	0.35	0.00855018	11.6693	0.0371306	3.70507	0.0194427	0.0733667	0.00682462	14.6335	0.045248	9.37317	0.0218876	0.163433	0.0119461	0.991	0.0234357	0.0337	0.00167429	0.145497	0.00221592	0.0293333	0.00373688	0.0215667	0.00152653	98.5055	1300	35 × 25	1.12614	0.01
1521-45-ol56	94.8032	0.0194722	57.3392	0.0973078	0.3536	0.0105598	12.1789	0.0465073	3.54755	0.023246	0.06245	0.00802007	13.319	0.0530777	10.1066	0.027637	0.1348	0.0147914	1.0416	0.0294611	0.0315	0.00206416	0.0662447	0.00210808	0.02945	0.00454988	0.01785	0.00180345	98.225	1300	28 × 28	1.20033	0.05
1521-45-ol57	94.5341	0.0357033	57.4997	0.0975801	0.35115	0.0104293	11.973	0.0462818	3.53815	0.0233512	0.06795	0.007992	14.4862	0.0553138	9.46185	0.0267622	0.14615	0.0143673	1.06225	0.0298958	0.0357	0.00207337	0.0664231	0.00209411	0.03305	0.00457728	0.0252	0.0018951	98.767	1300	37 × 32	0.967969	0.05
1521-45-ol58	94.6557	0.0125947	57.4704	0.0796333	0.3446	0.0085199	11.7302	0.0370227	3.46293	0.0187937	0.0665	0.00652967	14.6498	0.0452984	9.4134	0.0218608	0.1196	0.01176	1.00533	0.023765	0.0339667	0.00167487	0.0895762	0.00187801	0.0286667	0.00370047	0.0359667	0.00163227	98.4519	1300	31 × 30	1.11801	0.07
1521-45-ol59	94.7048	0.0389087	57.5631	0.0797618	0.3364	0.00841641	11.6342	0.0371675	3.58237	0.0191202	0.0745667	0.00658206	14.6209	0.045209	9.31207	0.0218637	0.1042	0.0116552	1.03883	0.0239384	0.0373	0.00169992	0.0950668	0.00190431	0.0304667	0.0037743	0.0341667	0.00162069	98.47	1300	80 × 46	1.03751	0.02	20	16.801	1971.38	71.3631	0.588327	0.062509	36.6064	1.29898	8.58779	0.486918	15.2695	0.728857	0.492384	0.0504475	4.75711	0.752471
1521-45-ol60	94.9973	0.0166483	57.8927	0.0802185	0.340033	0.00849413	11.7411	0.0372084	3.3724	0.0186053	0.0666333	0.00657512	14.5913	0.0454913	9.41923	0.0218743	0.113967	0.011551	0.993033	0.0236876	0.0362333	0.00169226	0.104898	0.00195856	0.0342	0.00380498	0.017	0.00149747	98.748	1300	62 × 47	1.088	0.03	20	8.486	1981.53	82.4309	0.75986	0.088996	38.0861	1.59	9.43015	0.781897	15.689	0.934685	0.530115	0.0913607	4.99718	1.05567
1521-45-ol61	95.0835	0.0478864	57.9646	0.0803181	0.341533	0.00850977	11.682	0.0371709	3.3408	0.0185596	0.0708667	0.00661012	14.608	0.0453567	9.4304	0.0219002	0.143067	0.0122282	1.0769	0.0245129	0.0464	0.00174387	0.199514	0.00246515	0.0331	0.003805	0.0246667	0.00156709	98.9825	1300	75 × 65	0.99816	0.03	20	18.61	2051.86	71.6983	0.840947	0.0695471	40.2117	1.37851	8.78056	0.443279	16.384	0.794417	0.521745	0.0520631	4.64787	0.918162
1521-45-ol62	94.7791	0.0101754	57.2612	0.0793435	0.346833	0.00853094	11.653	0.0372274	3.47167	0.018886	0.0580333	0.00655995	14.3296	0.0448598	9.47463	0.022003	0.109867	0.0118005	1.01043	0.0239194	0.0368667	0.00168823	0.100823	0.00193006	0.0332667	0.00373245	0.0286333	0.00157878	97.9325	1300	50 × 42	1.0113	0.05	38	12.082	1960.16	74.9733	0.658927	0.0606154	37.212	1.3143	9.14693	0.503532	15.7585	0.715814	0.460532	0.0509849	5.30317	0.708266
1521-45-ol63	94.7922	0.0222679	57.1304	0.0791622	0.328533	0.00845691	11.0298	0.0360858	3.31217	0.018443	0.0695667	0.00657619	15.4616	0.0466184	8.94643	0.0213496	0.180633	0.012025	0.927633	0.0229354	0.0371333	0.00170133	0.168057	0.00231149	0.0272333	0.0036243	0.0279667	0.00157571	97.6656	1300	53 × 53	1.75599	0.08	38	14.766	1921.74	59.5932	0.730995	0.0552498	35.2641	1.23662	8.58455	0.48481	14.8466	0.628078	0.481475	0.0481553	4.61789	0.665415
1521-45-ol64	94.9904	0.00972406	57.9763	0.0983891	0.3435	0.0104531	12.0141	0.0458743	3.23495	0.0222646	0.06795	0.00801651	13.7451	0.0537801	9.9155	0.0275778	0.12215	0.0143927	0.97515	0.0286424	0.0347	0.00204735	0.103964	0.00239464	0.02865	0.00445685	0.0299	0.00195892	98.5875	1300	36 × 36	1.14797	0.06
1521-45-ol65	93.9475	0.0330356	57.4389	0.097477	0.3395	0.0103872	11.4106	0.0451839	3.88765	0.0242829	0.07095	0.00802877	14.7775	0.0557294	9.2732	0.0266657	0.1512	0.014483	0.97075	0.0287842	0.0429	0.00211611	0.200134	0.0030568	0.02805	0.00455356	0.03475	0.00198926	98.6271	1300	38 × 38	1.23339	0.01
1521-45-ol66	94.9547	0.0121397	58.3717	0.09906	0.3395	0.0104028	11.8172	0.0456829	3.3442	0.0226225	0.0667	0.00799306	14.1393	0.0543316	9.50925	0.0268962	0.1124	0.0144596	1.0102	0.0290744	0.03365	0.00203364	0.0683925	0.00212928	0.0262	0.00443859	0.03205	0.00195279	98.88	1300	63 × 43	0.934041	0.02	20	12.357	2096.44	86.059	0.669936	0.0913509	38.147	1.54681	8.59395	0.597649	15.8699	0.998527	0.578173	0.076746	5.33092	1.16189
1521-45-ol67	94.7104	0.0134767	58.5103	0.0810743	0.348067	0.0084906	11.9539	0.0377288	3.61057	0.019178	0.0713667	0.00663011	15.0182	0.0460522	9.26203	0.0217462	0.140633	0.0115207	1.09887	0.0247743	0.0366	0.00166846	0.0982989	0.00192591	0.0287	0.00375072	0.0309667	0.00160131	100.216	1300	50 × 34	0.927795	0.02	38	16.407	1979.69	62.2126	0.61623	0.0559729	36.0161	1.03822	8.9901	0.443366	15.6567	0.827469	0.485446	0.0626808	5.37988	0.707847
1521-45-ol68	94.1344	0.053631	57.7048	0.0799581	0.332367	0.00845687	11.1736	0.0362701	3.85797	0.0197992	0.0701333	0.00679482	14.4946	0.0451897	9.1717	0.0215342	0.1302	0.0117843	0.989633	0.0236315	0.0376333	0.00169173	0.115968	0.00202529	0.0271667	0.00360532	0.0323667	0.00161115	98.1479	1300	54 × 43	0.929899	0.01	20	10.888	1924.67	101.742	0.670443	0.130987	35.7811	1.7133	8.73392	0.753264	16.1607	1.15135	0.467557	0.0941484	6.05085	1.38051
1521-45-ol69	95.023	0.0253196	58.1593	0.0805879	0.344633	0.00853426	11.7953	0.0372282	3.24557	0.0182386	0.0695667	0.00655422	14.6673	0.0453525	9.48467	0.0219039	0.101133	0.0117331	1.057	0.02418	0.0432667	0.00172426	0.153638	0.00224913	0.0307667	0.00375063	0.0201333	0.0015168	99.1811	1300	50 × 50	0.94502	0.03	20	12.231	1982.89	92.0637	0.913136	0.103452	39.931	1.69817	9.20097	0.699577	15.7313	0.991202	0.554864	0.0869263	6.72439	1.6746
1521-45-ol70	94.9656	0.0098789	57.9164	0.0802514	0.346033	0.00852461	11.8802	0.037496	3.43687	0.0187848	0.0675333	0.00660867	14.5737	0.0454432	9.5527	0.0220631	0.1284	0.0117842	1.02033	0.023868	0.0417	0.0017143	0.201919	0.00248979	0.0362	0.0038179	0.0137	0.00146142	99.2386	1300	45 × 31	0.970528	0.03
1521-45-ol71-i1	95.1241	0.0133119	57.8909	0.080216	0.335567	0.00846977	11.4419	0.0367006	3.16957	0.0180149	0.0656333	0.00647877	15.0343	0.0457151	9.14043	0.0214607	0.1348	0.0117915	0.947833	0.0229353	0.0299	0.00166784	0.055834	0.00166349	0.0283	0.00371316	0.0242667	0.00154958	98.2754	1300	75 × 58	1.08834	0.05	20	7.905	1979.25	74.4374	0.484362	0.0545161	34.8079	1.08926	8.75935	0.554476	14.8985	0.798951	0.511801	0.0617501	5.17374	0.854123
1521-45-ol71-i2	95.1241	0.0133119	57.8033	0.0800946	0.345967	0.0084838	11.457	0.0367491	3.29253	0.0183337	0.0660667	0.00662742	14.8019	0.0455779	9.30667	0.021851	0.142633	0.0121324	1.03207	0.0238484	0.0370667	0.0016934	0.114417	0.00204652	0.0272667	0.00358259	0.0306333	0.001586	98.4336	1300	65 × 58	1.24411	0.01
1521-45-ol72	94.7586	0.0125235	57.3717	0.0794965	0.352567	0.00860482	12.0406	0.0376941	3.58603	0.019186	0.0656	0.00659108	13.9872	0.0443307	9.76443	0.0223023	0.1347	0.0118295	0.993867	0.0237306	0.0328333	0.00168077	0.0696416	0.00173792	0.0334	0.00377786	0.0220333	0.00153093	98.4769	1300	33 × 27	0.9335	0.05
1521-45-ol73	94.7958	0.00623474	58.1483	0.0986809	0.3587	0.0105091	11.6599	0.0453472	3.3762	0.0227598	0.07205	0.00804312	14.6294	0.0555166	9.4444	0.0269363	0.1497	0.0145137	0.96305	0.0286024	0.05745	0.00220591	0.320407	0.00370807	0.0371	0.00462594	0.01475	0.00182295	99.2309	1300	33 × 33	1.07966	0.05
1521-45-ol74	94.4526	0.0200452	57.7342	0.0799989	0.346467	0.00851732	11.6417	0.0370426	3.4801	0.0188423	0.0647667	0.00665065	14.4578	0.0450749	9.34807	0.021829	0.111033	0.0118356	1.02267	0.0238812	0.0347	0.00168389	0.0785375	0.00179475	0.0324	0.00376872	0.0165	0.00149119	98.3738	1300	74 × 43	0.991065	0.01	38	11.335	1985.12	78.1507	0.531108	0.0651193	36.1751	1.29733	8.62057	0.585518	15.1162	0.844421	0.525459	0.0703251	4.572	0.962706
1521-45-ol75	94.4538	0.0493142	57.5311	0.0797175	0.343933	0.00853104	11.8315	0.0373425	3.61063	0.0191321	0.0666	0.00662782	14.7882	0.0455357	9.5103	0.0219631	0.122533	0.0117425	1.0418	0.024207	0.0418333	0.00174599	0.10643	0.00198407	0.0255333	0.00370707	0.0580667	0.00182061	99.0784	1300	49 × 35	0.890126	0.03	38	12.827	2070.22	77.3587	0.683163	0.0759531	36.7253	1.17701	8.94952	0.501303	16.0375	0.73287	0.50459	0.0674106	5.06966	0.867838
1521-45-ol76	95.1223	0.0193885	57.3933	0.0973997	0.35935	0.0105451	12.0001	0.0458209	3.2455	0.0223372	0.06415	0.00794858	14.5252	0.0554627	9.49515	0.0268563	0.12395	0.0150729	1.02695	0.0292402	0.0313	0.00205096	0.0590265	0.00203003	0.02925	0.00450228	0.01265	0.00178016	98.3798	1300	41 × 30	1.00205	0.02
1521-45-ol77	94.2185	0.0537691	57.7062	0.0979308	0.34215	0.0103954	11.7317	0.045349	3.50135	0.0231077	0.0647	0.00799076	14.7929	0.0557875	9.31085	0.026774	0.14435	0.0144643	1.0249	0.0293048	0.0349	0.00206391	0.0585305	0.00204766	0.03025	0.00446113	0.0385	0.0020424	98.7786	1300	36 × 28	1.00896	0.05
1521-45-ol78	94.81	0.0124833	57.8407	0.0801465	0.342133	0.00848705	11.7491	0.0370824	3.446	0.0187909	0.0700667	0.0066297	14.3254	0.0450329	9.39157	0.0219305	0.135933	0.0119006	0.956467	0.0233041	0.0314667	0.00167196	0.0900758	0.00187238	0.0264333	0.00369887	0.0187333	0.0015096	98.4438	1300	35 × 30	0.937439	0.05
1521-45-ol79	94.7317	0.00434492	57.7589	0.0980202	0.33735	0.0103211	11.7228	0.0453148	3.4152	0.0229418	0.06945	0.00811923	14.4353	0.0554607	9.5201	0.0271522	0.14265	0.0144782	0.9847	0.0287335	0.0314	0.00203752	0.0630907	0.00207344	0.0325	0.00454996	0.03435	0.0019796	98.561	1300	42 × 34	1.14665	0.01
1521-45-ol80	94.3913	0.0659482	58.0892	0.0985806	0.3477	0.0104114	11.4656	0.045132	3.71865	0.0238406	0.07985	0.00810905	14.5739	0.0556486	9.3488	0.0268831	0.10985	0.0148144	0.9259	0.0280686	0.03145	0.0020636	0.0788369	0.00222242	0.03	0.00459859	0.03485	0.00197965	98.8306	1300	63 × 63	1.01813	0.01	20	10.441	1991.66	106.873	0.549082	0.0958854	36.4863	1.62317	8.879	0.764472	16.0337	1.26776	0.528514	0.0917647	4.83084	1.19606
1521-45-ol81	94.0998	0.0144464	57.5032	0.0975862	0.3529	0.0104474	11.4808	0.0449204	3.77105	0.0239988	0.0758	0.00813631	14.6114	0.0557918	9.3848	0.0267663	0.13495	0.0145193	1.07655	0.0299929	0.0306	0.00204132	0.0604914	0.0020532	0.0298	0.00457768	0.0239	0.00188949	98.5344	1300	51 × 35	1.1562	0.04	38	10.888	2044.35	85.853	0.535415	0.0798885	35.977	1.4296	9.15659	0.676481	15.7088	1.02504	0.587384	0.0798946	5.33462	1.44374
1521-45-ol82	94.7894	0.0535646	57.4399	0.079591	0.3512	0.00859896	11.5987	0.037054	3.32653	0.0184806	0.0696667	0.00669203	14.2874	0.0449133	9.58153	0.0220054	0.106567	0.0116265	1.0324	0.0239894	0.0407	0.00172112	0.162169	0.00227846	0.0307333	0.00392306	0.0244667	0.00155192	98.0765	1300	63 × 42	1.01964	0.02	20	17.451	2057.96	47.6028	0.735024	0.0524927	37.6793	0.887353	8.83965	0.424376	16.0064	0.547471	0.53912	0.0443155	5.25667	0.672306
1521-45-ol83	95.0749	0.00606106	57.4696	0.0796322	0.3572	0.00853837	11.7931	0.0372213	3.34707	0.0185513	0.0622667	0.00664663	14.5677	0.0454175	9.4476	0.0219402	0.138767	0.0120361	1.04337	0.0242566	0.0407667	0.00171095	0.10429	0.00194853	0.0362667	0.00383224	0.0207333	0.00153058	98.4553	1300	70 × 46	0.953077	0.03
1521-45-ol84	94.9638	0.00299813	57.6409	0.0798696	0.341633	0.00848623	11.6976	0.0372204	3.36387	0.018602	0.0667667	0.00660449	14.7417	0.0455827	9.3667	0.0218725	0.127833	0.0116388	0.994533	0.0237213	0.0425	0.00172044	0.18665	0.00240688	0.0292667	0.00367624	0.0248667	0.00155638	98.6494	1300	37 × 33	0.992972	0.05
1521-45-ol85	94.9469	0.0229448	57.6361	0.079863	0.352733	0.00853627	11.5887	0.037022	3.27383	0.0183555	0.0651667	0.00657028	14.7606	0.045451	9.28603	0.0218026	0.1479	0.0118679	0.9745	0.0234602	0.0297667	0.00166791	0.053711	0.00163523	0.0296333	0.00375391	0.0251	0.00154983	98.2387	1300	57 × 48	1.1871	0.05
1521-45-ol86	94.6397	0.0172539	57.3988	0.0795341	0.347033	0.00851809	11.6028	0.0370671	3.5619	0.0190569	0.0684667	0.00656973	14.4884	0.0451704	9.50323	0.0219468	0.131967	0.0116523	1.00533	0.0236576	0.0410667	0.00172606	0.184325	0.00240761	0.0354	0.00374918	0.0233667	0.00153915	98.3984	1300	55 × 40	1.04831	0.01	20	11.634	2110.53	140.505	0.841614	0.125376	37.1285	2.18007	8.70796	0.649663	15.2552	0.975202	0.547657	0.117152	5.894	1.28434
1521-45-ol87	94.8128	0.0347103	57.6838	0.079929	0.337167	0.00848003	11.6187	0.0369693	3.365	0.0185645	0.0643333	0.00665288	14.5428	0.04534	9.3586	0.0218536	0.115067	0.0117671	1.01173	0.0237292	0.0401	0.00170891	0.116202	0.00203803	0.0315	0.00369914	0.0271	0.00156263	98.3113	1300	57 × 31	1.03461	0.02	20	9.993	1957.41	93.2951	0.803328	0.134806	37.2165	1.64958	8.77885	0.703169	15.1966	1.03346	0.526799	0.0862496	5.62841	1.268
1521-45-ol88	95.047	0.00282567	57.409	0.0795482	0.353233	0.00856205	12.0243	0.0376429	3.28763	0.0183487	0.0611333	0.0065448	14.1496	0.0446608	9.77653	0.0222038	0.129767	0.011791	1.0573	0.0243672	0.0328333	0.00167733	0.0625835	0.00169393	0.0313	0.00375246	0.0200667	0.00150931	98.4064	1300	74 × 36	0.996649	0.02
1521-45-ol89	94.7376	0.00429834	56.6531	0.0961435	0.33795	0.0104031	11.1856	0.0445571	3.6482	0.023561	0.069	0.00812651	14.3712	0.0548748	9.37935	0.0265288	0.18995	0.0150301	0.9205	0.0279451	0.0353	0.00208364	0.15122	0.00272708	0.02805	0.00442996	0.0247	0.00191123	96.9922	1300	33 × 33	1.39546	0.02
1521-45-ol90	94.5937	0.0115107	58.4784	0.08103	0.3349	0.00843942	11.5118	0.0367764	3.49623	0.0188848	0.0683333	0.00659205	14.8002	0.0455729	9.22197	0.0216522	0.141467	0.0117927	0.979433	0.0234884	0.0328333	0.00166681	0.0680821	0.00173578	0.0292	0.00380509	0.0293	0.00160276	99.2023	1300	66 × 38	1.02083	0.04	20	10.273	2068.41	89.8156	0.640056	0.118637	34.8345	1.67166	8.41216	0.631314	15.8781	1.22323	0.574337	0.0807078	5.69516	1.2048
1521-45-ol91	94.913	0.0356571	56.9605	0.0796643	0.345067	0.0085182	11.7716	0.037305	3.3289	0.0184937	0.0623333	0.0065305	14.3427	0.044901	9.4166	0.0218682	0.130567	0.0115833	1.02083	0.0238799	0.0359667	0.00168387	0.100509	0.00192284	0.0269667	0.00372085	0.015	0.00151456	97.5833	1300	44 × 31	0.945054	0.03	38	5.519	2006.78	100.726	0.578184	0.104211	36.9713	1.66959	8.86668	0.760761	16.619	1.25916	0.471033	0.0995617	4.52998	1.51898
1521-45-ol92	94.9185	0.00900818	57.9357	0.080278	0.3398	0.00850598	11.6723	0.0369903	3.31927	0.0184399	0.0660333	0.00652277	14.9343	0.0457949	9.38167	0.0219074	0.146733	0.0118734	0.999767	0.0236275	0.0298333	0.00165625	0.0507116	0.00160764	0.0339667	0.00381819	0.03	0.00159378	98.9428	1300	49 × 38	0.648787	0.02	38	11.783	1990.38	62.0154	0.54387	0.0582152	35.8525	1.09154	8.84964	0.462769	15.9892	0.790879	0.583909	0.0563748	4.4208	0.848395
1521-45-ol93	94.8998	0.0243639	57.085	0.0798385	0.360467	0.00852463	11.3127	0.0365776	3.1886	0.0181231	0.0641	0.00668294	14.3815	0.0450222	9.1396	0.0215767	0.149067	0.0116612	0.977633	0.0235452	0.0501	0.0017524	0.26883	0.00278343	0.03	0.00364858	0.0230333	0.00152132	97.0604	1300	46 × 46	0.969327	0.002	38	13.871	2009.28	67.2095	0.937946	0.0734583	37.3426	1.1279	8.63076	0.489316	15.8482	0.768495	0.568532	0.0601489	4.2383	0.886668
1521-45-ol94	95.0435	0.0325579	57.4256	0.0795712	0.353567	0.00854706	11.9309	0.0375038	3.32793	0.0184881	0.0656667	0.00663932	14.1708	0.0447255	9.81993	0.0223002	0.124867	0.011729	1.0157	0.0238607	0.0281667	0.00166571	0.0539305	0.00162709	0.031	0.00368081	0.0233667	0.00153718	98.3841	1300	50 × 35	1.07915	0.03	38	11.037	2145.15	71.2199	0.519661	0.0603032	37.8514	1.16148	9.2465	0.623897	16.7419	0.896564	0.519065	0.0624587
1521-45-ol95	94.782	0.0339458	57.3806	0.0795089	0.3316	0.00845872	11.6886	0.0370418	3.4655	0.0188076	0.0673333	0.00664349	14.5606	0.0452094	9.41787	0.0217496	0.118067	0.0116544	1.0274	0.0238457	0.0340667	0.00167095	0.0566375	0.00165618	0.0298	0.00370181	0.0232667	0.00153066	98.2097	1300	50 × 45	1.12304	0.01	20	8.635	1944.91	97.3688	0.533759	0.088447	35.3441	1.685	8.42769	0.598547	15.9232	1.06487	0.487532	0.0667409	3.91151	1.1055
1521-45-ol96	94.4851	0.0218493	57.6253	0.0977933	0.34675	0.0103899	11.7621	0.0454664	3.54635	0.0233213	0.06705	0.00823063	14.5523	0.055566	9.3906	0.0265606	0.12195	0.0143183	1.0571	0.0295754	0.03445	0.00205466	0.0825836	0.00224649	0.032	0.00449461	0.0281	0.00190915	98.6433	1300	50 × 35	0.98937	0.06	38	6.713	1990.03	86.1188	0.655553	0.0804066	35.0319	1.41787	9.2864	0.662222	15.4845	0.91387	0.573262	0.104738	5.18288	1.00253
1521-45-ol98	95.0811	0.0176786	58.2343	0.0806919	0.332967	0.0084856	11.3546	0.0367111	3.29637	0.0183972	0.0670667	0.00661007	14.4363	0.0451939	9.32467	0.0218933	0.129967	0.0119687	1.00733	0.0237813	0.0331333	0.00167911	0.0582219	0.00163929	0.0311333	0.00378321	0.0296667	0.00165268	98.3617	1300	67 × 56	0.910903	0.01	38	25.952	2015.75	58.2905	0.630016	0.0442822	36.2413	0.832093	8.83504	0.378353	16.0914	0.594941	0.576187	0.0428131	5.12497	0.670494
1521-45-ol99	95.1447	0.024765	57.4525	0.0796085	0.358633	0.00858722	11.8465	0.0373896	3.1778	0.0181024	0.0631	0.00655231	14.6645	0.0451549	9.38337	0.0219114	0.1253	0.0117931	0.972667	0.0232375	0.0500333	0.00176476	0.300982	0.00293101	0.0353667	0.00377346	0.0290333	0.00157722	98.4633	1300	39 × 33	0.937889	0.03
1521-47-ol1	94.6673	0.00654996	58.3849	0.0831477	0.320467	0.00857927	11.1388	0.0374432	3.38464	0.0177609	0.0629667	0.00633683	15.316	0.0479479	8.94847	0.0214699	0.160067	0.0116017	0.9794	0.0247042	0.0300658	0.00155395	0.0733333	0.00181315	0.0328333	0.00418779	0.0337	0.0015397	98.3737	1310	42 × 37	0.823757	0.039842	38	10.109	1915.08	60.5646	0.583064	0.051088	34.5703	0.964869	8.71587	0.467198	15.659	0.574977	0.499391	0.0522636	3.87672	0.534757
1521-47-ol2	94.4045	0.0361043	57.5129	0.0819058	0.314767	0.00856208	10.684	0.036874	3.79273	0.0187345	0.0699	0.00643857	15.6655	0.0488403	8.66953	0.0211343	0.1915	0.0117489	0.9786	0.0247527	0.0327144	0.0015744	0.161667	0.00234384	0.0282333	0.00399262	0.0289	0.00169375	97.6397	1310	46 × 38	1.12345	0.0144479	38	10.975	1971.15	63.078	0.756494	0.0582518	34.4314	1.02666	8.64584	0.358991	15.8576	0.651752	0.529902	0.0510979	4.93484	0.58754
2222-48-ol2	95.1	0.00178394	57.6583	0.115381	0.281233	0.0115728	10.1535	0.190624	3.66846	0.0322003	0.0712333	0.00654518	18.6024	0.330304	8.18223	0.100489	0.2169	0.0127909	0.845033	0.0259917	0.0299	0.00219788	0.0517333	0.00188863	0.0251	0.0059984	0.0258003	0.00189225	99.4925	1350	49 × 45	1.07308	0.114362	38	12.835	1688.35	64.3988	0.507047	0.0340721	32.1079	0.725109	7.93374	0.337181	14.0884	0.49974	0.426618	0.0356231	4.45691	0.630819
2222-48-ol20	95.23	0.0473339	57.1023	0.18688	0.3024	0.0115014	10.5907	0.0649472	3.66138	0.0441914	0.0709667	0.0058451	17.6919	0.178229	8.48603	0.109869	0.206067	0.0090433	0.8357	0.0353888	0.0286333	0.00219468	0.0553	0.00122322	0.0207	0.00565168	0.0164033	0.00105564	98.7532	1350	50 × 28	0.114147	0.00539137	38	12.835	1788.92	73.5254	0.481794	0.0375387	31.3104	0.879309	8.04882	0.459758	13.9043	0.495086	0.446273	0.0517138	4.58236	0.702081
2222-48-ol21	94.92	0.0523339	57.3411	0.0976828	0.276433	0.0138978	9.98637	0.04525	3.98452	0.0267402	0.0743	0.00773333	18.4012	0.0986431	8.03127	0.031126	0.240833	0.0187671	0.8637	0.0248037	0.0323667	0.00184566	0.0908	0.00320132	0.0223	0.00787832	0.0286227	0.00228948	99.0447	1350	42 × 43	0.970084	0.0334472	38	21.284	1705.16	60.2413	0.592993	0.0415	32.1312	0.651149	7.80021	0.2775	13.6116	0.469159	0.451908	0.0292297	4.07849	0.470315
1522-34-ol21	94.5245	0.0244594	57.0047	0.215702	0.347885	0.00528297	11.5092	0.0210048	3.5466	0.0183401	0.0721	0.00144222	13.524	0.0376407	9.4995	0.040732	0.114733	0.0115197	1.33703	0.0137057	0.0690667	0.00126725	0.383067	0.0022084	0.0302667	0.000900206	0.0199	0.00096148	97.458	1280	60 × 60	1.1	0.06	38	18.83	2187.18	357.388	1.42787	0.207223	49.2669	7.90289	8.88557	1.43308	17.9591	2.72371	0.614765	0.085075	5.52752	0.814788
1522-34-ol50	94.8856	0.0293267	58.7614	0.102491	0.3396	0.0107348	11.5027	0.0466331	3.11459	0.0209224	0.06045	0.00772879	13.5794	0.0556919	9.43985	0.0271449	0.0962	0.014178	1.31265	0.0343739	0.0282889	0.00188493	0.06305	0.00214603	0.0241	0.00482579	0.02715	0.00188752	97.8436	1280	60 × 47	1.33821	0.0408796	38	17.765	2074.03	57.6861	0.592905	0.0374324	36.7797	0.889296	9.31305	0.362032	16.4965	0.564936	0.553125	0.0377153	5.08788	0.540582
1522-34-ol51	94.6326	0.0119218	58.1887	0.0828683	0.375133	0.00893092	11.7051	0.0382949	3.28117	0.0174705	0.0562333	0.00632751	13.7166	0.0454041	9.43377	0.0221495	0.115533	0.0113441	1.3428	0.0283921	0.0360574	0.00157433	0.119167	0.00210238	0.0343667	0.00407042	0.0134333	0.00137886	97.8783	1280	54 × 38	1.35469	0.0474891
1522-34-ol52	94.6244	0.0214676	58.2999	0.0830266	0.370967	0.00887281	11.4427	0.0378771	3.25469	0.017413	0.0661333	0.0062921	13.452	0.0450458	9.57383	0.0221098	0.104	0.0113301	1.2806	0.0277507	0.0402086	0.00160716	0.182033	0.00243831	0.0341	0.00414272	0.0154333	0.00138974	97.5717	1280	50 × 35	1.34399	0.0200404	38	20.509	2216.87	63.4541	0.893722	0.0516541	40.4181	0.985376	9.57847	0.329197	16.9676	0.506698	0.588786	0.0388128	5.18411	0.538752
1522-34-ol53	94.8058	0.00573496	58.3394	0.083083	0.3579	0.00880736	11.4138	0.0377812	3.31073	0.0175853	0.0675333	0.00633611	13.4591	0.0450696	9.5712	0.0221037	0.120667	0.0114886	1.3468	0.0284954	0.0360943	0.0015801	0.118467	0.00209603	0.0269667	0.00404622	0.0190333	0.00142165	97.67	1280	72 × 60	1.28549	0.0181512	38	11.698	2056.69	75.652	0.732472	0.0653056	37.5545	0.99687	8.89625	0.400543	16.5073	0.65034	0.514586	0.0416278	4.64935	0.56125
1522-34-ol54	94.6933	0.0114596	58.9242	0.0839158	0.341033	0.00877933	11.111	0.0372065	3.31785	0.0176232	0.0643	0.00630328	13.4012	0.0448757	9.37433	0.0220099	0.113067	0.011353	1.30513	0.0280483	0.0449857	0.0016373	0.173467	0.00240146	0.0357667	0.00403318	0.0255333	0.00149335	97.7048	1280	70 × 53	1.19273	0.0201981	38	14.298	2049.67	66.5368	0.927998	0.0615884	38.6469	1.14285	9.08496	0.368084	16.2755	0.608979	0.544954	0.0452494	5.58547	0.692803
1522-34-ol55	94.3027	0.0231501	58.1764	0.0828508	0.347233	0.00877211	11.387	0.0376927	3.49502	0.0180261	0.063	0.00636312	13.6584	0.0457369	9.41267	0.0220999	0.120367	0.011374	1.32417	0.0281515	0.0355979	0.00159051	0.1164	0.00208634	0.0336667	0.0039749	0.0127	0.00138428	97.6492	1280	52 × 46	1.39937	0.0250363	38	9.387	2183.61	74.7514	0.773491	0.0545066	39.054	1.11107	9.17497	0.386095	17.0497	0.783167	0.579386	0.0482666	5.8441	0.747122
1522-34-ol56	94.6806	0.0146698	57.8847	0.0824354	0.335233	0.00875203	11.2597	0.0375672	3.26512	0.017469	0.0559333	0.00625874	13.1972	0.0447024	8.96817	0.0216707	0.0869333	0.0113617	1.3016	0.0279554	0.0350011	0.00159224	0.128433	0.00217191	0.0308333	0.00400281	0.01935	0.00138569	96.3362	1280	64 × 52	1.2046	0.0225958	38	13.865	2006.48	59.4448	0.750695	0.049354	36.6933	0.948896	8.73793	0.425117	15.7693	0.613619	0.558053	0.0494572	4.87333	0.667973
1522-34-ol57	94.5135	0.0462913	57.9833	0.0825758	0.353267	0.00872111	11.1084	0.0371978	3.62144	0.01826	0.0701	0.0063194	13.5775	0.0454661	9.32753	0.0219	0.0837333	0.0114613	1.348	0.0283983	0.0625637	0.00171456	0.382467	0.00329754	0.0263	0.00388541	0.0247667	0.00147951	97.4238	1280	65 × 51	1.31042	0.0442414	38	20.654	2060.73	68.2664	1.39072	0.0735795	47.0987	1.26485	9.13018	0.344392	17.5597	0.494966	0.623827	0.0466097	5.52098	0.475811
1522-34-ol58	94.8742	0.0149799	57.9843	0.0825773	0.3666	0.00886928	11.6771	0.0382034	3.13568	0.0171383	0.0583333	0.0062871	13.5438	0.0453531	9.53233	0.022014	0.1205	0.0113873	1.31147	0.0279994	0.0372593	0.00159147	0.195533	0.0025087	0.0317	0.00406017	0.0211667	0.0014496	97.506	1280	48 × 39	1.3439	0.0381379	38	12.853	2144.89	62.7726	0.781561	0.0494836	36.1642	0.928951	9.02717	0.38544	16.5484	0.550318	0.490054	0.0385471	4.30209	0.606586
1522-34-ol59	94.3058	0.038674	58.6218	0.083485	0.3563	0.00883293	11.5156	0.0381184	3.46499	0.0179602	0.0686	0.00630154	13.4727	0.0451152	9.5435	0.0220398	0.0832667	0.011476	1.34757	0.0285456	0.0388535	0.00158991	0.158833	0.00231499	0.0336667	0.00411703	0.0191667	0.00144738	98.1942	1280	68 × 57	1.18157	0.0852168	38	16.031	2148.09	59.0958	0.876732	0.0501957	40.3519	1.0641	9.35046	0.337327	16.9461	0.557632	0.537866	0.0368013	5.15119	0.492199
1522-34-ol60	94.5103	0.0333991	58.459	0.0832533	0.3365	0.00879779	11.1409	0.0373068	3.37746	0.0177232	0.0713333	0.00635053	13.1846	0.0446579	9.46737	0.0221075	0.0941667	0.0118455	1.27177	0.0274945	0.0385697	0.00158402	0.136333	0.00220221	0.0318333	0.00401557	0.0260333	0.00148445	97.2019	1280	82 × 82	1.08708	0.0059376	38	18.779	2050.6	46.1196	0.793143	0.0356452	39.0416	0.696204	9.22727	0.252122	16.462	0.391185	0.540972	0.0265776	5.09683	0.401932
1522-47-ol1	94.5976	0.0245053	56.6814	0.0807217	0.332067	0.00863884	10.3051	0.0360944	3.9428	0.0190711	0.0746667	0.00637832	15.2991	0.0480913	8.96493	0.0213937	0.176567	0.0116992	1.04047	0.0254194	0.0420434	0.00163498	0.252133	0.00277886	0.0267667	0.00391863	0.0129667	0.00138148	96.5808	1310	39 × 31	1.35128	0.0420594	38	8.664	1947.78	64.9111	0.95484	0.0666851	39.5132	1.15294	8.35134	0.466779	15.2034	0.603725	0.524162	0.0628538	4.92836	0.790625
1522-47-ol10	94.4447	0.0134066	58.2519	0.0829583	0.304333	0.00853186	10.3463	0.0362387	4.48064	0.0202355	0.0942	0.00652632	15.0896	0.0476256	8.85537	0.0214731	0.1102	0.0113214	1.15433	0.0265859	0.0340796	0.00156586	0.134833	0.00219706	0.0308333	0.00397773	0.0287333	0.00151207	98.4605	1310	140 × 116	0.849306	0.0198678	38	26.001	1898.15	34.016	0.76488	0.0232402	35.6507	0.474665	8.39479	0.169809	15.1558	0.253683	0.498488	0.0175846	4.51619	0.227641
1522-47-ol11	94.9805	0.0051397	58.0514	0.0826728	0.3321	0.00865255	10.7369	0.0367806	3.59898	0.0182396	0.0691333	0.0063312	15.1981	0.0479679	9.15213	0.0217237	0.1669	0.011594	1.12107	0.0261632	0.0366274	0.00156312	0.1366	0.00220659	0.0304667	0.00390294	0.0142333	0.00141712	98.1847	1310	59 × 49	1.01697	0.0364304	38	14.009	2001.32	58.7684	0.75918	0.0567036	37.3419	1.01144	8.96763	0.427837	16.3536	0.629099	0.535554	0.0400625	4.47873	0.662257
1522-47-ol12	94.8641	0.0128184	56.621	0.0806358	0.3408	0.00872562	10.8935	0.037317	3.84213	0.0187812	0.069	0.00637234	15.7052	0.0485617	8.88417	0.0214296	0.1776	0.0117221	1.13293	0.0262967	0.0340701	0.00156667	0.150133	0.00227101	0.0252	0.00394545	0.0171667	0.00139688	97.4305	1310	34 × 34	1.30619	0.0296035
1522-47-ol13	94.94	0.0125913	57.8007	0.0823157	0.3345	0.00868075	10.7177	0.0367147	3.51002	0.0180586	0.0667333	0.00631546	15.3941	0.0479941	8.82683	0.0214039	0.173167	0.0116488	1.18897	0.0268372	0.0312659	0.00155501	0.109667	0.00203884	0.0270333	0.00387705	0.0196333	0.00142961	97.7241	1310	45 × 37	1.06375	0.0438297	38	7.22	2001.07	67.3271	0.620733	0.0512595	36.0771	1.07248	8.91779	0.592921	15.577	0.726726	0.523979	0.0649603	4.43206	1.03623
1522-47-ol14	94.9646	0.0214781	58.6612	0.0835412	0.333633	0.00866836	11.045	0.0374106	3.44799	0.0178722	0.0698333	0.00636313	15.6267	0.0487191	8.95777	0.0213766	0.170533	0.0115453	1.18407	0.0268438	0.0376283	0.00158148	0.176667	0.00241639	0.0330667	0.0039636	0.0198667	0.00143585	99.2752	1310	54 × 46	0.916068	0.0447945	38	11.265	2007.64	74.9165	0.805333	0.0601296	37.604	1.11355	8.87779	0.391679	15.8073	0.598586	0.506261	0.0421458	5.00695	0.622709
1522-47-ol15	94.8664	0.0691746	57.7627	0.0822616	0.326433	0.00859617	10.7172	0.036713	3.59294	0.0182546	0.0747333	0.00638786	15.1833	0.0479213	9.03983	0.0215725	0.1258	0.0114376	1.11097	0.0259433	0.0302566	0.00153109	0.0987333	0.00198507	0.0267	0.00410326	0.0189333	0.00146153	97.6836	1310	72 × 55	0.98298	0.0117317	38	21.376	2025.36	55.7733	0.696942	0.0418379	34.7148	0.868096	8.8156	0.293006	15.2711	0.459665	0.499343	0.0397092	4.49892	0.485174
1522-47-ol16	94.9749	0.0114138	57.6378	0.100532	0.320067	0.0104865	10.5212	0.0453822	3.6844	0.0204955	0.0776333	0.00676983	15.2074	0.0591441	8.95107	0.0263732	0.138067	0.0109206	1.12033	0.033565	0.0370867	0.00195134	0.1608	0.00398718	0.0280667	0.00577038	0.0207	0.00143419	97.173	1310	89 × 83	0.912777	0.0136307
1522-47-ol17	94.9457	0.0189921	57.7126	0.0821903	0.327333	0.00869367	10.6851	0.0367405	3.52143	0.0180721	0.0705	0.00639363	15.2422	0.048107	8.90593	0.0215957	0.183267	0.0117063	1.15527	0.0265325	0.0385986	0.00156939	0.165133	0.0023454	0.0368333	0.0040845	0.0156667	0.00139715	97.6414	1310	56 × 44	1.02535	0.039264	38	10.832	1939.76	73.7521	0.830238	0.0565358	34.8553	1.0212	8.73542	0.35234	15.1307	0.623125	0.420011	0.0366025	5.03658	0.844816
1522-47-ol2	94.4839	0.0248564	57.619	0.082057	0.322467	0.00858906	10.5164	0.0365652	3.9205	0.0190639	0.0820667	0.00644439	15.1111	0.0476932	8.9752	0.0214182	0.1659	0.0116755	1.09617	0.0260745	0.0340839	0.0015621	0.144833	0.00225602	0.0275	0.0039815	0.0254333	0.00149145	97.6507	1310	60 × 55	0.975231	0.0258109	38	16.609	1980.67	57.8864	0.789207	0.0443454	37.4731	0.938107	8.73773	0.306601	15.5019	0.48366	0.498013	0.0409147	4.54321	0.490365
1522-47-ol3	94.4642	0.0469187	57.4878	0.0818702	0.3337	0.00868263	10.615	0.0367713	3.9315	0.0190668	0.0744	0.00646923	14.8171	0.0473358	9.26043	0.0218619	0.154567	0.0115789	1.10297	0.0261378	0.0346827	0.00155058	0.174467	0.00240858	0.0266333	0.00403226	0.0214	0.00146552	97.6408	1310	50 × 43	0.995277	0.0604513	38	17.042	2039.27	61.1383	0.796347	0.0457963	38.0182	0.976852	9.03236	0.34817	16.2011	0.538737	0.518616	0.0389839	5.03277	0.521135
1522-47-ol4	94.7428	0.0506606	57.2536	0.0815365	0.336	0.00868277	10.5508	0.0365492	3.6437	0.0184191	0.0696	0.00636005	15.4121	0.0482488	8.76863	0.0212628	0.185033	0.0117545	1.13637	0.0263635	0.0333242	0.00153947	0.120767	0.00211508	0.0247	0.00389154	0.0218667	0.00145812	97.1567	1310	46 × 38	1.0952	0.0254022	38	9.823	1961.86	61.6932	0.68865	0.0601001	34.9339	1.22658	8.63715	0.36833	15.9992	0.695308	0.464399	0.0408314	3.96896	0.688532
1522-47-ol5	94.6107	0.00643113	56.647	0.0806727	0.353633	0.00877426	10.5242	0.0365938	3.82838	0.0188124	0.0743333	0.00632683	15.4874	0.0484966	9.07997	0.0216701	0.204433	0.0119944	1.07987	0.0257162	0.0350599	0.00156519	0.147467	0.00226515	0.0347	0.00406176	0.0123	0.00137397	97.0853	1310	35 × 35	1.13757	0.020374
1522-47-ol6	94.938	0.0106416	57.0244	0.0812102	0.345167	0.0087303	10.7393	0.0367888	3.55162	0.0181359	0.0700333	0.00625552	15.2287	0.0476745	9.03873	0.0215699	0.170967	0.0118796	1.08963	0.0259491	0.0332221	0.00155758	0.152133	0.00227994	0.0272667	0.00401481	0.0161667	0.00142116	97.0287	1310	48 × 33	1.16078	0.0862542	38	11.553	1999.42	65.2291	0.756388	0.0663601	36.7444	1.08091	8.68556	0.402646	15.4473	0.536335	0.508557	0.0441608	4.98093	0.569672
1522-47-ol7	95.029	0.0201318	57.8365	0.0823668	0.317033	0.00864484	10.6843	0.0367377	3.54916	0.0181691	0.0688667	0.00638814	15.1961	0.0479618	8.9068	0.0214842	0.1388	0.0114991	1.12283	0.0262347	0.0272207	0.00151404	0.0549	0.00168314	0.0238	0.00385958	0.0193667	0.00143849	97.531	1310	66 × 53	0.968456	0.0182799	38	13.287	1932.86	56.3351	0.541361	0.0547473	34.1225	0.868625	8.36859	0.329994	15.3304	0.500806	0.499852	0.0369393	4.34103	0.659256
1522-47-ol8	94.8225	0.0197422	56.9293	0.0810747	0.329267	0.00865347	10.6225	0.0367975	3.66401	0.0184746	0.0785667	0.00634009	15.0853	0.0479997	8.98133	0.0215487	0.171167	0.0117765	1.115	0.0261516	0.0387185	0.00157974	0.189467	0.00248194	0.0278333	0.00395529	0.0242333	0.00147802	96.8549	1310	42 × 35	1.06382	0.0469913
1522-47-ol9	94.7982	0.04554	57.8228	0.0823473	0.331467	0.00860031	10.6799	0.0367228	3.7804	0.0186736	0.0724	0.00631606	15.5575	0.0485034	8.80043	0.0213417	0.168967	0.0116375	1.1487	0.0264574	0.0338131	0.00156105	0.160067	0.00233071	0.0288	0.00394824	0.0653	0.00363564	98.2077	1310	38 × 33	1.1689	0.0215552
2218-48-ol1	94.96	0.00618854	55.4508	0.944097	0.342367	0.0136092	10.1746	0.177349	4.1161	0.0573751	0.0814885	0.00838944	17.4157	0.0970815	8.63867	0.162329	0.291367	0.0198178	1.0976	0.0303006	0.0654667	0.00287025	0.384567	0.00494443	0.0456333	0.00729948	0.0211	0.00174603	98.1251	1350	45 × 38	0.749558	0.05	38	13.232	2030.52	67.6757	1.39036	0.0870323	48.8854	1.39598	8.40553	0.377412	17.897	0.77276	0.528871	0.0512396	5.37995	0.713012
2218-48-ol17	95.1	0.0225383	56.9133	0.116438	0.2881	0.00918614	10.0408	0.0522879	3.95742	0.0227172	0.0785667	0.00918342	18.0245	0.0970785	8.3312	0.0514044	0.2491	0.0162828	1.03117	0.0371916	0.0306667	0.00267277	0.0576	0.0023157	0.0236	0.00543882	0.0153407	0.00163154	98.7148	1350	57 × 48	0.919592	0.013035	38	18.185	1819.04	46.9273	0.518318	0.0391236	31.928	0.84817	7.86726	0.319594	13.9948	0.495349	0.45188	0.0334228	4.90942	0.454427
2218-48-ol3	94.67	0.0203626	56.1736	0.167145	0.3128	0.0113988	9.93787	0.0381449	4.39487	0.0202434	0.086847	0.0119894	18.0956	0.121245	8.41797	0.0570581	0.2847	0.0148143	1.05837	0.0501634	0.0399	0.00300179	0.174067	0.00332149	0.0294667	0.0044392	0.0222	0.00179378	99.0283	1350	48 × 41	0.122288	0.0905243	38	10.332	1839.67	59.0012	0.758321	0.0627258	35.1751	0.905583	8.16791	0.300922	14.6811	0.543138	0.503823	0.047448	4.45588	0.53844
2218-48-ol6	94.88	0.0087511	56.2928	0.097174	0.3101	0.0108709	10.1498	0.0577821	4.21022	0.0295587	0.0843	0.0103519	18.1964	0.0720699	8.34303	0.0281026	0.278267	0.0152696	1.11743	0.0361084	0.0529333	0.00193508	0.284233	0.00580144	0.0331	0.00659338	0.0287224	0.00163679	99.0525	1350	54 × 50	1.06293	0.128415	38	13.99	1909.1	55.1116	1.11428	0.0770818	36.8042	1.13527	8.06944	0.341495	14.4018	0.490772	0.431158	0.0323383	4.51236	0.484121
2218-48-ol7	94.95	0.0135527	57.0278	0.137359	0.3063	0.016562	10.1176	0.0733158	3.97049	0.0460109	0.0729	0.00662254	17.8455	0.131642	8.4486	0.103055	0.2671	0.0249793	1.07327	0.0338343	0.0287333	0.00278162	0.0556	0.00220006	0.0212333	0.00711864	0.0297849	0.0023401	98.9374	1350	60 × 48	0.839466	0.013356	38	16.245	1850.41	49.0453	0.519355	0.0332719	32.2421	0.794164	8.2691	0.311986	14.1307	0.423759	0.4515	0.0304385	4.60124	0.487833
2218-48-ol9	94.74	0.0341691	55.9168	0.209029	0.3158	0.0147521	10.147	0.0685152	4.1221	0.0284889	0.0819463	0.0073883	18.0163	0.0613427	8.42883	0.0505671	0.2757	0.0166864	1.09757	0.0303063	0.0453333	0.00347165	0.249933	0.003239	0.025	0.00665842	0.0279	0.00291791	98.7495	1350	40 × 38	0.822151	0.10952	38	10.183	1899.65	60.2938	0.888815	0.0566477	37.6983	0.931514	8.33483	0.324332	15.2734	0.68211	0.523482	0.0394223	4.99913	0.750498
1523B-28-ol133	93.7005	0.00681251	54.4201	0.192883	0.2637	0.00263987	8.55268	0.0441392	5.76215	0.0192072	0.101	0.00499689	20.1909	0.0666667	7.69965	0.101305	0.4208	0.0132936	0.86265	0.00240416	0.03835	0.000141421	0.11425	0.0022156	0.03265	0.000329983	0.0287	0.00188562	98.9378	1400	54 × 54	0.9	0.05	38	19.33	1560.38	243.963	0.744085	0.130118	28.8824	4.71659	6.9083	0.878013	13.4649	2.03958	0.349565	0.0721529	3.76813	0.590719
1523B-28-ol134	93.513	0.00824134	54.5619	0.138223	0.2787	0.0060385	8.75974	0.0595662	5.9481	0.0261716	0.1109	0.00679447	19.6203	0.0994095	7.6813	0.0204835	0.4559	0.00626103	0.865	0.0461333	0.0376	0.00174965	0.1527	0.00130304	0.0392	0.0101685	0.0143	0.000953333	98.9479	1400	51 × 51	0.2	0.01	38	16.051	1616.54	264.75	0.800886	0.126524	31.6076	5.01582	7.05861	1.01701	13.2012	1.65365	0.407979	0.0884889	4.45179	1.05922
1523B-28-ol153	93.7245	0.00292269	53.9403	0.140245	0.2553	0.00624634	8.46218	0.0597994	5.56243	0.0252164	0.1001	0.00663997	21.3791	0.101195	7.13353	0.0199739	0.410267	0.00629076	0.838267	0.0461047	0.0359	0.00205587	0.0958667	0.00116957	0.0246	0.0102156	0.0298667	0.00149864	98.6929	1400	60 × 60	0.9	0.05	38	13.888	1695.77	284.646	0.554392	0.141541	30.7815	5.45332	6.53029	1.32142	12.1765	2.04047	0.385913	0.0763069	4.15512	0.959368
1523B-28-ol157	93.4926	0.0177702	54.3665	0.242802	0.2529	0.00253246	8.43936	0.0644574	5.67617	0.0489436	0.100233	0.00311722	21.0252	0.0666667	7.1465	0.0266074	0.365367	0.00487458	0.868067	0.00800231	0.0341	0.0014	0.0833667	0.00113399	0.0303667	0.00540877	0.0267	0.00193333	98.8908	1400	60 × 60	1	0.05	38	13.579	1465.43	286.95	0.449178	0.0711705	27.489	4.78529	7.0048	1.11155	10.7841	2.07921	0.367245	0.083085	3.58693	0.566361
1523B-28-ol162	93.5774	0.0112025	54.4761	0.130743	0.250833	0.00486617	8.39441	0.0486876	5.6587	0.029048	0.1034	0.00884415	20.9989	0.127394	7.3748	0.0181912	0.3787	0.0117649	0.832867	0.0409215	0.0314333	0.00168273	0.0925	0.000955833	0.0356	0.00956453	0.026	0.00124544	99.087	1400	63 × 63	0.8	0.05	38	21.315	1651.59	250.638	0.625952	0.151167	30.1821	4.8237	6.64332	1.02574	12.2656	1.7205	0.385868	0.0607151	3.40085	0.57389
1523B-34-ol12	93.6452	0.00484514	57.3291	0.202563	0.3358	0.0147528	11.2833	0.0624343	4.5383	0.0387268	0.0821	0.0116363	13.4403	0.0636174	9.2347	0.0948096	0.1176	0.0127949	1.2579	0.0611339	0.0529	0.00474689	0.2065	0.00513497	0.0246	0.0131807	0.0236	0.00440691	98.5122	1280	75 × 75	1.35	0.226991	38	11.214	1862.46	336.405	0.906425	0.205918	36.8849	6.16356	8.84126	1.32519	15.0773	2.97474	0.474415	0.0852607	4.80429	1.05796
1523B-34-ol27	93.25	0.0161761	57.0645	0.201628	0.3443	0.014736	10.9928	0.0615597	4.5598	0.0389103	0.083	0.0116532	13.6556	0.0646365	9.1632	0.0946864	0.1389	0.0128344	1.1244	0.0584688	0.059	0.004838	0.2635	0.00555107	0.0484	0.0133132	0.0368	0.00465643	98.117	1280	54 × 54	1.43333	0.0743864	38	22.583	1966.72	307.912	1.20258	0.201072	40.2109	6.29941	8.71204	1.1707	16.1359	2.31434	0.615667	0.0885036	6.28575	1.0003
1523B-45-ol106	93.5124	0.0261597	56.9511	0.0789138	0.317167	0.00835627	10.3285	0.0351169	4.4597	0.0212851	0.0890667	0.00671576	15.3114	0.0465575	8.56287	0.0208743	0.195633	0.0119698	1.11347	0.0250288	0.0367	0.00169139	0.157183	0.00224052	0.0319	0.00371323	0.0266667	0.00156046	97.611	1300	50 × 50	1.65889	0.02
1523B-45-ol107	93.815	0.00726491	57.754	0.0800263	0.324655	0.00846047	10.8748	0.0359971	4.06033	0.0202126	0.0769333	0.00666689	14.889	0.0458463	8.83937	0.0210941	0.169837	0.0120028	1.135	0.0250343	0.0366667	0.00169023	0.142567	0.00220067	0.026	0.00371284	0.0226333	0.0015222	98.3503	1300	57 × 42	1.19069	0.05
1523B-45-ol108	93.5571	0.0116321	57.5571	0.0797535	0.323947	0.00848539	10.7574	0.0356084	4.39767	0.020989	0.085	0.00669061	14.8114	0.0457981	8.972	0.0212961	0.152583	0.0117372	1.16127	0.0254343	0.0343667	0.00167275	0.0984	0.0019393	0.0328	0.0037664	0.0245667	0.00155629	98.4065	1300	51 × 42	1.33294	0.01	38	15.661	1937.25	68.8564	0.669002	0.0519945	35.4582	1.06008	8.84737	0.44928	15.1297	0.594598	0.478157	0.0657988	4.39323	0.660458
1523B-45-ol109	93.7892	0.000694842	57.5061	0.0796827	0.321067	0.00839638	10.8682	0.0359753	4.10433	0.0204317	0.0761	0.00670732	14.823	0.0458339	8.8729	0.0212886	0.179367	0.0119834	1.14753	0.0252939	0.0414	0.00172598	0.179472	0.00236484	0.0275667	0.00370106	0.0257667	0.00156212	98.2082	1300	50 × 30	1.16026	0.02
1523B-45-ol110-i1	93.4434	0.0202962	55.2124	0.0779471	0.355833	0.00856353	11.4273	0.0368143	4.46927	0.0212185	0.0844	0.00666003	13.7623	0.0443366	9.16013	0.0217446	0.150333	0.0117226	1.25257	0.0264283	0.0476333	0.00173824	0.212884	0.00253505	0.0264333	0.00368175	0.0211667	0.00160902	96.2003	1300	37 × 30	0.52	0.05
1523B-45-ol111	93.6984	0.00510396	56.5695	0.0791175	0.3058	0.00839329	10.1606	0.035098	4.34057	0.020996	0.0867333	0.00671565	17.1516	0.0499229	8.30137	0.0207884	0.152933	0.0119104	1.11287	0.0249294	0.0327	0.00169474	0.0848404	0.00184372	0.0251	0.00386853	0.0236667	0.00154419	98.3764	1300	45 × 36	1.39188	0.01	38	11.038	1779.18	86.066	0.625092	0.0658959	32.3634	1.05088	7.92124	0.494418	14.3209	0.961723	0.431392	0.0540747	4.04695	0.839341
1523B-45-ol113	93.5666	0.0311541	56.8866	0.0788243	0.314355	0.00840213	10.4334	0.0353393	5.11507	0.0225757	0.105067	0.00684553	14.9028	0.0458888	8.75903	0.0209024	0.119911	0.0116555	1.09947	0.0247854	0.0427667	0.00173159	0.195067	0.00246033	0.0250667	0.00370125	0.0292333	0.00158597	98.0255	1300	115 × 92	1.30316	0.01	20	35.945	1860.51	33.2039	0.948827	0.0437112	37.2146	0.701588	8.30899	0.255546	14.3654	0.375192	0.474179	0.0294688	5.26148	0.435543
1523B-45-ol114	93.6741	0.011711	57.878	0.0801982	0.329934	0.00832324	10.7497	0.035583	4.2898	0.0207495	0.0827333	0.00667806	14.6489	0.0454836	8.93847	0.0213306	0.149816	0.0117486	1.1396	0.0250608	0.0347667	0.00167767	0.130567	0.0021208	0.0217	0.00358516	0.0264667	0.00154578	98.4194	1300	125 × 71	1.26856	0.07	20	10.59	1898.32	99.6234	0.768194	0.0996849	35.6669	1.65047	7.78477	0.659245	14.2666	1.05101	0.501119	0.0834693	5.35553	1.16131
1523B-45-ol115	93.5112	0.0257568	56.8486	0.0787717	0.321153	0.00838525	10.4202	0.0352946	4.589	0.0214314	0.0907333	0.00674938	15.2036	0.0462297	8.58727	0.020823	0.184541	0.01184	1.12707	0.0250308	0.0460333	0.00174502	0.207533	0.00252157	0.0248333	0.00369282	0.028	0.00157684	97.677	1300	51 × 51	1.55777	0.06	38	12.38	1873.19	59.3682	0.950281	0.0799918	37.6439	1.26931	8.5344	0.520756	15.2986	0.639423	0.508732	0.0556344	5.3665	0.72303
1523B-45-ol116	93.45	0.00530983	56.393	0.0781404	0.327714	0.00839834	10.4766	0.0352172	4.3505	0.0208757	0.0875333	0.00666717	14.5538	0.0451882	8.77153	0.0210454	0.142262	0.0119081	1.1341	0.0250565	0.0321667	0.00166771	0.062	0.0016813	0.0322667	0.00366825	0.0189	0.00149275	96.3809	1300	50 × 45	1.26291	0.02
1523B-45-ol117	93.5753	0.0135849	57.5741	0.079777	0.333433	0.00846667	10.5434	0.0354417	4.45353	0.0212557	0.0916667	0.00677378	15.0206	0.0462514	8.7692	0.0212642	0.156	0.0119207	1.15137	0.0254394	0.0485333	0.00177217	0.259638	0.00273156	0.0270333	0.00431417	0.0284667	0.00158727	98.4957	1300	57 × 47	1.35299	0.08	20	14.766	1924.81	70.5613	1.04113	0.0832499	39.1526	1.41867	8.1425	0.51808	14.7034	0.752286	0.493587	0.0699974	6.31242	1.03242
1523B-45-ol118	93.4938	0.00570963	57.4214	0.0795654	0.3364	0.00852049	10.9865	0.0362264	4.42597	0.0211241	0.082	0.00672192	14.8262	0.0460342	8.92067	0.0212881	0.1783	0.0120102	1.2065	0.0258511	0.0352667	0.0016847	0.0949881	0.00188777	0.0293333	0.00372166	0.0218	0.00154918	98.5964	1300	46 × 34	1.29358	0.03	38	11.186	1925.04	63.2368	0.62229	0.0721525	34.7577	1.08897	8.38033	0.475971	15.0351	0.722348	0.485781	0.0609736	4.99133	0.692123
1523B-45-ol119	93.558	0.00596681	57.4369	0.0795869	0.3302	0.00844844	10.7639	0.0359068	4.46827	0.0212688	0.0904	0.00676479	14.661	0.0457107	9.0765	0.0215442	0.177567	0.0119936	1.1375	0.0252918	0.0392667	0.00171941	0.184028	0.00238963	0.0262333	0.00375412	0.0264	0.00157335	98.4529	1300	37 × 32	1.21752	0.05
1523B-45-ol120	93.5074	0.0101181	57.5282	0.0797134	0.3456	0.00855779	11.2508	0.0365205	4.3335	0.0209609	0.0833667	0.00671157	14.1879	0.0447797	9.28573	0.0218019	0.136767	0.0117547	1.2236	0.0260135	0.0354667	0.00169371	0.0969211	0.00191156	0.0237667	0.00368614	0.0282667	0.00157698	98.5871	1300	50 × 38	0.876173	0.03	38	12.529	2035.85	72.0455	0.675296	0.0575661	38.2627	1.09238	8.7778	0.469258	16.2947	0.830329	0.51856	0.0649577	5.22452	0.699123
1523B-45-ol121	93.677	0.00918982	57.6983	0.0799491	0.3263	0.0084397	10.5222	0.0355054	4.8129	0.0220446	0.0952	0.00684576	14.7988	0.0461382	8.84333	0.0212176	0.0906333	0.0115699	1.0742	0.0247127	0.0372667	0.00170809	0.131901	0.00210691	0.0303333	0.00376537	0.0280333	0.00156747	98.5214	1300	99 × 94	1.18395	0.00493328	20	32.962	1925.38	39.0526	0.760385	0.0408185	35.3411	0.830777	7.93216	0.270724	14.5816	0.446616	0.498777	0.0326343	4.97428	0.42041
1523B-45-ol122	93.6492	0.00555087	56.8437	0.0787649	0.332851	0.00835019	10.4809	0.0352317	4.72543	0.0217048	0.0936667	0.00675155	15.288	0.0464864	8.6551	0.0209875	0.178419	0.0119142	1.13627	0.0251045	0.0509667	0.00175952	0.2977	0.00292193	0.0243	0.00368653	0.0261667	0.00155103	98.132	1300	52 × 52	1.52243	0.08	20	13.579	1933.48	52.5449	1.01009	0.071444	38.5195	1.05482	7.64968	0.34969	14.5732	0.529069	0.532159	0.0490011	4.57316	0.59319
1523B-45-ol123	93.557	0.0171378	57.5849	0.079792	0.315733	0.00839798	10.4787	0.0354928	4.56673	0.0214444	0.0883333	0.00677431	14.8409	0.0460796	8.78547	0.0213036	0.132533	0.0117445	1.12717	0.0252092	0.0335333	0.00168902	0.0869181	0.00184063	0.026	0.00374419	0.0311667	0.00161355	98.1282	1300	78 × 66	1.29468	0.03	20	20.872	1871.99	37.1009	0.657192	0.0342499	34.6188	0.679274	8.00875	0.281114	14.4746	0.38816	0.481645	0.0281794	5.05878	0.415123
1523B-45-ol124	93.6544	0.013167	57.4358	0.0795853	0.331306	0.0084646	10.8706	0.0359833	4.16223	0.0205062	0.0808667	0.00668322	14.9109	0.0459138	8.84097	0.0210979	0.158419	0.0116642	1.14387	0.0251547	0.0448667	0.00173173	0.229267	0.00262676	0.025	0.00359103	0.0247333	0.00155223	98.257	1300	41 × 41	1.2345	0.03
1523B-45-ol125	93.6648	0.0145662	56.6937	0.078557	0.326633	0.00843732	10.4982	0.0355588	4.67217	0.0217596	0.0884333	0.00678649	14.9131	0.0459205	8.79387	0.021324	0.166467	0.0121094	1.15207	0.025454	0.0506667	0.00177532	0.269416	0.00277913	0.0263667	0.00368619	0.0307667	0.00160709	97.714	1300	66 × 66	1.27533	0.08	20	13.274	1927.03	51.3468	1.02941	0.0711565	40.0469	1.0239	8.06277	0.349755	15.4277	0.511067	0.52332	0.0399312	5.38315	0.650178
1523B-45-ol126	93.5251	0.01366	57.3035	0.079402	0.324733	0.00842885	10.7449	0.0359808	4.34617	0.0210222	0.0834667	0.00671382	14.7631	0.0456487	8.93643	0.0213257	0.145567	0.0118697	1.18287	0.025664	0.0361	0.00170744	0.106621	0.00197128	0.027	0.00369626	0.0247	0.0015375	98.0527	1300	52 × 43	1.29374	0.03	38	13.424	1964.85	77.6701	0.732226	0.0760845	35.4723	1.10731	8.20013	0.470459	15.2445	0.791642	0.53559	0.0577664	5.27006	0.902329
1523B-45-ol127	93.6676	0.0150379	56.9778	0.0789508	0.32714	0.00835716	10.7023	0.0355639	4.43893	0.0210722	0.0864333	0.00679431	14.6993	0.0452621	8.8743	0.0211775	0.143816	0.0119745	1.1494	0.0252829	0.0388333	0.00170373	0.121667	0.00206866	0.0274333	0.00362886	0.0225333	0.0015497	97.6091	1300	78 × 53	1.25867	0.05	20	7.53	1905.97	80.2439	0.786587	0.0840776	35.7979	1.49367	8.29482	0.826843	14.9325	1.11294	0.45232	0.0681656	5.1826	1.56998
1523B-45-ol128	93.6209	0.00539705	57.8576	0.0801699	0.328692	0.00838648	10.8927	0.0357774	4.27847	0.0206947	0.0800333	0.00665546	14.8898	0.0456585	8.8516	0.0210103	0.172939	0.0118109	1.16293	0.0252906	0.0343333	0.00167083	0.0933	0.00190008	0.0274333	0.00370073	0.0177333	0.00149666	98.6862	1300	44 × 37	1.36358	0.06
1523B-45-ol129	93.45	0.0318502	56.5996	0.0798856	0.323967	0.00841325	10.0527	0.0348236	4.81137	0.0220995	0.0888667	0.00685601	15.6418	0.0471617	8.47463	0.0208761	0.202167	0.0122247	1.06953	0.0247155	0.0533667	0.00179408	0.325457	0.00300644	0.0317667	0.00382316	0.0215333	0.00152581	97.7352	1300	42 × 33	1.95609	0.07	38	11.187	1929.94	72.1697	1.06084	0.0770036	39.128	1.16876	8.01737	0.560226	14.7964	0.755782	0.477227	0.0524183	4.96134	0.688292
1523B-45-ol130	93.2986	0.0121562	57.7776	0.0800589	0.320657	0.00835228	10.6292	0.035595	4.52785	0.0212618	0.09005	0.00685087	15.0908	0.0464702	8.6756	0.0209265	0.184358	0.0117537	1.1479	0.0254954	0.0343	0.0016604	0.1166	0.00204656	0.0298	0.00380893	0.0264	0.0015527	98.6497	1300	39 × 39	1.55301	0.04
1523B-45-ol131	93.4129	0.00836969	56.6565	0.0785055	0.336038	0.00846888	10.6269	0.0354498	4.37993	0.0209607	0.0835667	0.00666095	14.5427	0.0453398	8.98027	0.0213157	0.172114	0.0119696	1.11497	0.0247914	0.0410667	0.00173398	0.1532	0.00225649	0.0311	0.00376682	0.0281333	0.00157242	97.1449	1300	49 × 40	1.33504	0.05	38	8.502	1941.09	71.3561	0.893751	0.0821997	37.6673	1.17879	8.68683	0.50936	15.5967	0.727059	0.476009	0.0596973	5.07481	0.802304
1523B-45-ol132	93.3222	0.00713639	57.5822	0.0797882	0.32276	0.00827821	10.4988	0.0351565	4.63517	0.021528	0.0923333	0.00671103	14.7908	0.045544	8.83123	0.0210747	0.169786	0.0119971	1.1095	0.024744	0.0331333	0.00165852	0.0785667	0.00181558	0.0308667	0.00381705	0.0334667	0.00159599	98.2073	1300	73 × 50	1.21	0.02	20	18.583	1883.57	47.3041	0.60048	0.0474263	33.4556	0.970809	7.92559	0.381223	13.827	0.500025	0.438105	0.0451625	5.03024	0.503685
1523B-45-ol133	93.7114	0.00999722	57.7189	0.0799776	0.327042	0.00848037	10.8142	0.0357966	4.33027	0.020834	0.0873333	0.0067439	14.8092	0.0456005	8.94113	0.021337	0.122652	0.0113829	1.1146	0.0248838	0.0305667	0.00166878	0.0726333	0.00176053	0.0288333	0.00361549	0.0212333	0.00151399	98.4158	1300	62 × 62	1.27209	0.02	20	13.424	1974.03	58.945	0.589922	0.0515675	34.8892	0.900397	8.10723	0.3738	14.2583	0.566379	0.491006	0.0443916	5.67851	0.767316
1523B-45-ol134	93.729	0.00527917	57.346	0.079461	0.325219	0.00841757	10.8396	0.0358806	4.388	0.0209429	0.0881333	0.00668096	15.0117	0.0460322	8.84777	0.0211141	0.167337	0.0117861	1.1376	0.0251335	0.0372667	0.00169144	0.1516	0.00223293	0.0292667	0.00361955	0.0176	0.00148458	98.3856	1300	50 × 31	1.46072	0.03
1523B-45-ol135-i1	93.3833	0.0121865	57.5012	0.0975828	0.32635	0.0103245	10.5616	0.0433156	4.4006	0.0259308	0.08195	0.00823946	14.7242	0.0562227	8.93035	0.0261008	0.1634	0.0146354	1.1092	0.0305665	0.0324	0.00204983	0.0848735	0.0022329	0.0303	0.00466436	0.02315	0.00187213	98.0043	1300	43 × 35	1.46449	0.02	38	11.932	1928.9	66.1775	0.638519	0.0565581	35.0239	1.27135	8.758	0.602908	14.8324	0.648599	0.48395	0.0526457	4.69159	0.666937
1523B-45-ol135-i2	93.3833	0.0121865	57.3546	0.0973339	0.3238	0.0103276	10.5783	0.0433837	4.52475	0.0262357	0.0819	0.00828572	14.8386	0.0563107	8.85615	0.0260935	0.18715	0.0147359	1.13315	0.0309024	0.03325	0.0020604	0.103134	0.00236042	0.02775	0.00439876	0.01855	0.00183778	98.0966	1300	30 × 30	1.20048	0.05
1523B-45-ol135-i3	93.3833	0.0121865	56.9395	0.0966296	0.311	0.0102113	10.349	0.0431761	4.68635	0.0267309	0.0893	0.00826434	15.2375	0.0571062	8.5258	0.0257222	0.18355	0.0147312	1.0818	0.0303429	0.0305	0.00205261	0.0786057	0.00219928	0.0288	0.00447614	0.0305	0.00193747	97.6068	1300	25 × 25	1.20048	0.05
1523B-45-ol136	93.5942	0.00774118	57.4993	0.0819463	0.327136	0.00851711	10.6746	0.0368737	4.4259	0.0211238	0.0865	0.00676075	14.9894	0.0481554	8.74325	0.0210897	0.175368	0.0124016	1.17245	0.0269217	0.0321	0.00166239	0.09115	0.00187353	0.02735	0.00377485	0.0295	0.00147251	98.2724	1300	46 × 46	1.3442	0.02	38	15.959	1886.7	64.688	0.596485	0.05262	34.4539	0.959312	8.56428	0.423447	15.2009	0.693054	0.503711	0.0539088	4.61373	0.600831
1523B-45-ol137	93.78	0.00911339	57.4202	0.0795637	0.340626	0.00851776	10.8954	0.0359262	4.2386	0.0206115	0.0796667	0.00667216	14.4643	0.0450976	9.15473	0.0214962	0.144869	0.0114512	1.14947	0.0252215	0.0406333	0.00169556	0.158733	0.0022791	0.0272667	0.00375806	0.0242667	0.00154796	98.1359	1300	48 × 41	1.32256	0.01	38	12.082	1950.84	72.0149	0.761986	0.0701268	38.2271	1.38367	8.48391	0.545029	15.7314	0.816025	0.555306	0.0728978	4.6305	0.720082
1523B-45-ol138	93.7297	0.00516198	57.2632	0.0793463	0.324809	0.0084484	10.7643	0.0356312	4.37843	0.020954	0.0837667	0.00667969	15.0126	0.0458423	8.86993	0.021167	0.151505	0.0116148	1.1258	0.0250172	0.0339	0.00167868	0.115833	0.00203923	0.0262	0.00359796	0.0144667	0.00145321	98.1627	1300	42 × 32	1.53313	0.04
1523B-45-ol139	93.6854	0.0115472	58.0326	0.0804123	0.321767	0.00840542	10.7451	0.0358439	4.24353	0.020798	0.0813667	0.00680037	14.7787	0.0458866	9.00277	0.021484	0.153867	0.0120534	1.1081	0.0250081	0.0337	0.00168061	0.0934007	0.00187901	0.0307	0.00366859	0.0193	0.00150901	98.6784	1300	60 × 41	1.3448	0.01	20	16.258	1962.35	61.8825	0.677152	0.0668957	35.972	1.19917	8.19811	0.474256	15.3354	0.669676	0.503637	0.057286	5.49176	0.740297
1523B-45-ol140	93.6309	0.00943095	57.0475	0.0790473	0.3394	0.00851335	10.563	0.0353715	4.49123	0.0213781	0.0905667	0.00686026	14.817	0.0461947	8.8355	0.0211988	0.174067	0.01208	1.1525	0.0253901	0.0521	0.00178363	0.296874	0.0028986	0.0280333	0.00361721	0.0287667	0.00159152	97.9472	1300	54 × 45	1.33373	0.02	20	18.496	1964.95	70.127	0.974311	0.0640706	40.0058	1.2247	8.29617	0.43204	15.2295	0.647962	0.552347	0.0544513	5.08186	0.745228
1523B-45-ol141	93.6711	0.011111	57.4259	0.0795717	0.327937	0.00840752	10.4603	0.0351639	4.5874	0.0214239	0.0922333	0.00672443	15.1376	0.0462241	8.6911	0.0210748	0.180328	0.0119596	1.10587	0.0249519	0.0468	0.00173909	0.2743	0.00282629	0.0299333	0.00372151	0.0171667	0.00149297	98.3754	1300	37 × 37	1.91264	0.02
1523B-45-ol143	93.3926	0.00917071	54.8498	0.0781133	0.313781	0.00840187	9.849	0.0343711	4.68083	0.0216198	0.0907333	0.00671388	14.4466	0.0452306	8.6749	0.0210355	0.194835	0.0121267	0.989633	0.0234656	0.0357	0.00170346	0.1584	0.00227263	0.0286	0.00361112	0.0217333	0.00153769	94.3331	1300	33 × 33	2.00523	0.03
1523B-45-ol145-i1	93.4853	0.00938727	57.4822	0.0796497	0.326039	0.00847934	10.5456	0.0353134	4.44323	0.0210926	0.0915667	0.00673822	14.8609	0.0457596	8.78753	0.0209704	0.140295	0.0116221	1.1318	0.0248919	0.0397	0.00170797	0.126633	0.00209918	0.0319667	0.00368103	0.0254667	0.00154624	98.0305	1300	71 × 48	1.37205	0.03	20	17.304	1900.46	48.6183	0.741902	0.0494861	35.9693	0.934835	7.91354	0.370993	15.2806	0.535401	0.495594	0.0454595	5.30427	0.628203
1523B-45-ol145-i2	93.4853	0.00938727	57.6201	0.138288	0.331054	0.0146767	10.7631	0.0617084	4.2375	0.0358775	0.0827	0.0113685	14.807	0.0789707	8.8988	0.0367817	0.187646	0.0203658	1.1206	0.0431805	0.0393	0.00294488	0.1282	0.00365797	0.0329	0.00635847	0.0307	0.00276505	98.2779	1300	25 × 25	1.17609	0.05
1523B-45-ol146	93.3636	0.0125191	57.1583	0.0792009	0.32868	0.00849795	10.6877	0.0355156	4.8376	0.0219715	0.100733	0.0068687	14.9755	0.0461126	8.83377	0.0210807	0.144391	0.0115417	1.12647	0.0249607	0.0373333	0.00169037	0.149833	0.00223385	0.0284	0.00370595	0.0325667	0.00159536	98.4387	1300	87 × 72	1.48038	0.03	20	20.285	1939.87	47.6144	0.79209	0.0491775	36.9246	0.900553	8.56517	0.343556	14.5363	0.520038	0.462493	0.0366294	5.54416	0.604128
1523B-45-ol157	93.8196	0.00495212	57.8118	0.0801063	0.328856	0.0082915	10.6854	0.0353701	4.21093	0.020584	0.0850667	0.00683966	14.6689	0.0453574	8.857	0.0211362	0.130145	0.0117499	1.1458	0.0251532	0.0337333	0.0016841	0.0873333	0.0018645	0.0246333	0.00365277	0.0204667	0.00151536	98.0892	1300	30 × 30	1.20331	0.05
1523B-47-ol1	93.4121	0.0115053	56.9757	0.0811408	0.3062	0.00842694	10.0556	0.0358661	4.76989	0.0208686	0.0919333	0.00653556	15.4966	0.0485133	8.5579	0.0210812	0.175433	0.0117369	1.0345	0.0253906	0.031836	0.0016125	0.1066	0.00202827	0.0258333	0.00393082	0.0251667	0.00149129	96.9514	1310	112 × 50	1.04026	0.0882188	38	19.501	1829.38	40.0223	0.696166	0.025827	33.6283	0.574341	8.14747	0.189977	14.5429	0.342297	0.485671	0.0228819	4.46684	0.312311
1523B-47-ol10	93.457	0.0391631	57.1114	0.081334	0.311133	0.00857606	10.0985	0.0357595	4.60389	0.0205557	0.0923333	0.00647187	15.3079	0.0483144	8.63027	0.0211493	0.1805	0.0118764	1.07347	0.0258789	0.0328489	0.00161995	0.122933	0.00212308	0.0272667	0.00390525	0.0288333	0.00151619	96.9239	1310	75 × 65	1.003	0.0479126	38	28.023	1884.15	57.9179	0.71447	0.0421214	34.7807	0.770646	8.5465	0.28893	15.3359	0.454571	0.490815	0.0301538	4.72303	0.44237
1523B-47-ol11	93.5303	0.00366645	57.4789	0.0818575	0.308167	0.00850204	10.1851	0.0360662	4.41457	0.020107	0.0802667	0.00646439	15.3708	0.0485131	8.63813	0.0211686	0.155767	0.0116227	1.07303	0.0257449	0.0296462	0.00158629	0.0696	0.00180049	0.0265667	0.00388876	0.0206667	0.00144723	97.2313	1310	64 × 58	1.03301	0.0611867	38	19.209	1814.08	54.3291	0.650484	0.0470198	32.8301	0.822843	8.18752	0.283884	14.4029	0.494084	0.477474	0.0333003	4.22954	0.427943
1523B-47-ol12	93.4599	0.00339679	56.4043	0.0824981	0.319967	0.00862982	10.1349	0.0358884	4.64259	0.0206095	0.0867333	0.00656027	14.8786	0.0475321	8.87427	0.0214057	0.204433	0.0119243	1.0516	0.0254751	0.0279629	0.00155815	0.0663333	0.00175424	0.0348667	0.00402124	0.0215	0.00145974	96.1935	1310	43 × 38	1.18487	0.0692625	38	14.731	1911.25	54.9581	0.605789	0.0508396	34.0124	0.849669	8.68644	0.332982	15.2871	0.674931	0.517943	0.0370571	4.33757	0.472674
1523B-47-ol13	93.6715	0.00306141	57.1751	0.0814249	0.316033	0.00859001	10.23	0.0360945	4.42003	0.020075	0.0846667	0.00645799	14.8279	0.0475614	9.0549	0.0216084	0.214567	0.0118871	1.04503	0.0253459	0.0270495	0.00157863	0.0922667	0.00193688	0.0296333	0.00410347	0.0217667	0.00146564	96.8592	1310	48 × 40	1.16784	0.0572189	38	11.267	1971.01	76.0278	0.634913	0.044335	35.3199	0.971043	8.92838	0.429419	15.5007	0.584643	0.504478	0.0641377	4.95541	0.725155
1523B-47-ol14	93.6889	0.0335367	57.2528	0.0815354	0.304067	0.00849333	10.202	0.036126	4.38429	0.0200253	0.0855667	0.0064731	15.4705	0.0484315	8.616	0.0210038	0.1662	0.0116948	1.06557	0.0258253	0.0290991	0.0015915	0.0815667	0.00186496	0.0279333	0.00412411	0.0139667	0.00138404	97.0207	1310	52 × 44	1.11339	0.0081448	38	21.379	1829.65	56.9312	0.590757	0.0357148	33.0395	0.754228	8.3621	0.315593	14.783	0.461592	0.465803	0.0386317	4.50212	0.419038
1523B-47-ol15-i1	93.5303	0.0301239	57.1763	0.0814265	0.3178	0.00855044	10.2201	0.0361901	4.48616	0.020318	0.0817667	0.00650617	15.268	0.0481886	8.69773	0.0210909	0.174333	0.0117315	1.09583	0.0260144	0.0356518	0.00160741	0.111267	0.00206717	0.0280667	0.00392389	0.0253	0.00148814	97.108	1310	62 × 58	0.932715	0.01	38	11.698	1838.37	63.2374	0.750753	0.0488479	33.8037	0.917222	8.22895	0.32544	14.642	0.504002	0.473117	0.0381757	4.468	0.564316
1523B-47-ol15-i2	93.5303	0.0301239	57.1763	0.0814265	0.3178	0.00855044	10.2201	0.0361901	4.48616	0.020318	0.0817667	0.00650617	15.268	0.0481886	8.69773	0.0210909	0.174333	0.0117315	1.09583	0.0260144	0.0356518	0.00160741	0.111267	0.00206717	0.0280667	0.00392389	0.0253	0.00148814	97.108	1310		0.932715	0.01	38	17.334	1859.89	58.5556	0.725665	0.041555	34.2581	0.868763	8.32849	0.300526	14.6952	0.587241	0.502058	0.0381092	4.6312	0.545174
1523B-47-ol16	93.6267	0.0110458	57.0264	0.0812131	0.32175	0.00868138	10.2608	0.0355445	4.45916	0.0223123	0.09125	0.0075436	15.1864	0.0479311	8.9399	0.021564	0.1833	0.0153335	1.04755	0.0245685	0.0374791	0.00165578	0.097	0.00141131	0.0234	0.00331539	0.0266	0.00188549	97.1354	1310	48 × 40	1.12368	0.0396063	38	16.6825	1936	42.8202	0.731557	0.0309742	35.237	0.662059	8.54998	0.214809	15.3518	0.349748	0.507988	0.0258803	4.9027	0.393142
1523B-47-ol17	93.8713	0.0126018	57.5366	0.0819396	0.312267	0.00852607	10.2501	0.0362966	4.29246	0.019826	0.0829667	0.00642205	15.4591	0.0483959	8.65547	0.0212111	0.1667	0.011614	1.11827	0.0262275	0.0278274	0.00156908	0.0782	0.00184817	0.0269	0.00392922	0.0122333	0.00138311	97.4088	1310	62 × 48	1.16814	0.0230979	38	19.067	1840.75	56.9373	0.598909	0.0438662	33.1341	0.82191	8.33945	0.307378	14.5773	0.526912	0.491409	0.0389732	4.72938	0.436382
1523B-47-ol18	93.6993	0.0225754	57.5144	0.0819081	0.313267	0.00854513	10.2663	0.0363539	4.46965	0.0203003	0.0845667	0.00649357	15.5383	0.048644	8.64433	0.0212941	0.116733	0.0116033	1.08737	0.025991	0.0348685	0.00159839	0.105933	0.00201967	0.0278	0.00392714	0.0189667	0.00144675	97.5746	1310	103 × 70	1.10502	0.00868825	38	9.245	1806.51	55.0719	0.715617	0.0448177	34.4334	0.832428	8.326	0.364626	14.8152	0.587958	0.484984	0.0338762	4.93541	0.542313
1523B-47-ol19	93.7528	0.0158404	57.3928	0.0817348	0.3071	0.00856664	10.2055	0.0361386	4.57222	0.0204142	0.0892	0.00654423	15.4415	0.0485388	8.7244	0.0211555	0.150433	0.0115767	1.0673	0.0258265	0.0325349	0.00159636	0.129667	0.00216455	0.0244667	0.00407904	0.0176333	0.00142887	97.5562	1310	71 × 60	1.04486	0.0306551	38	16.468	1851.12	57.8429	0.709682	0.048722	35.2992	0.848633	8.4508	0.360907	15.4167	0.508308	0.511995	0.0429957	4.62286	0.51448
1523B-47-ol2	93.3377	0.0249214	56.4606	0.10114	0.31505	0.0105002	10.0238	0.0437096	4.70623	0.0254025	0.09225	0.00799811	14.7013	0.0578687	8.98505	0.0264733	0.1685	0.0143322	1.0751	0.0315254	0.031647	0.00194138	0.1167	0.0025636	0.02485	0.00473886	0.0216	0.00182071	96.1538	1310	64 × 57	1.12511	0.014015	38	20.076	1922.61	59.0175	0.741156	0.0449739	36.0102	0.883699	8.42178	0.330002	15.5055	0.456614	0.519412	0.0425368	4.7858	0.518283
1523B-47-ol20	93.4954	0.00893905	56.8099	0.0809047	0.3059	0.00851308	10.002	0.0358028	4.50789	0.0203005	0.0823333	0.00645877	15.7052	0.048964	8.35383	0.0209	0.175433	0.0117533	1.07343	0.0258509	0.0349143	0.00161669	0.124933	0.00214148	0.0279333	0.00398663	0.0234667	0.00147126	96.5689	1310	48 × 43	1.2569	0.0205227	38	6.356	1832.47	70.3806	0.742147	0.0652603	33.4366	1.01964	8.40469	0.570325	14.4191	0.789568	0.483506	0.0474052	4.36872	0.641156
1523B-47-ol21	93.6925	0.0106764	55.5389	0.0812324	0.315	0.00856809	10.1973	0.0362409	5.15123	0.0216116	0.1019	0.0066408	15.3272	0.0483753	8.69267	0.0210786	0.138733	0.0116416	1.06773	0.0259193	0.0473551	0.00170133	0.262267	0.00282988	0.0237	0.00400262	0.0423	0.00165017	96.2096	1310	135 × 93	1.09652	0.0119493	38	34.235	1840.55	41.3678	1.11117	0.0333099	38.6078	0.65809	8.09603	0.187153	15.351	0.335316	0.513873	0.0229547	4.93698	0.306371
1523B-47-ol22	93.7665	0.0156185	57.1522	0.0813922	0.313967	0.00850723	10.0655	0.0359016	4.51234	0.0203206	0.0888	0.00645456	15.9365	0.0490716	8.39777	0.0209028	0.1617	0.0116494	1.08337	0.0258692	0.0356697	0.00160937	0.1673	0.00236541	0.0272333	0.00428684	0.0120333	0.00137572	97.3614	1310	42 × 42	1.40574	0.0340106	38	6.067	1837.33	69.4589	0.782182	0.0605763	34.5314	1.09392	8.17181	0.428845	14.4597	0.658041	0.505426	0.0536495	4.38824	0.681466
1523B-47-ol23	93.7129	0.00918803	57.4422	0.0818053	0.3042	0.00851325	10.157	0.0359668	4.51658	0.0203396	0.0937333	0.00644537	15.3919	0.0485797	8.6172	0.0212273	0.153433	0.0116056	1.0621	0.0257274	0.0304488	0.00158333	0.0976	0.00196623	0.0264	0.00403878	0.018	0.00143235	97.2861	1310	72 × 65	1.08981	0.0178583	38	16.468	1816.76	59.6771	0.640031	0.0446349	33.0009	0.815794	8.51713	0.301419	14.4283	0.55402	0.465074	0.0472178	4.52745	0.459598
1523B-47-ol24	93.8394	0.00991742	56.8102	0.0830918	0.3138	0.00858436	10.1734	0.0360248	4.54512	0.02041	0.0908333	0.00655752	15.9253	0.0490373	8.40277	0.020699	0.189033	0.0117678	1.08053	0.0259142	0.0399938	0.00165689	0.2296	0.00268067	0.0258	0.00402933	0.0218333	0.00145115	97.1308	1310	46 × 43	1.3571	0.0193908	38	6.934	1852.81	68.5747	0.781756	0.0787935	34.7047	1.12766	8.18988	0.429691	14.8259	0.708452	0.496119	0.0478988	4.50607	0.752302
1523B-47-ol25	93.6454	0.0217872	57.4893	0.0818723	0.312067	0.00854492	10.1494	0.0359399	4.44253	0.0201772	0.0839333	0.00648392	15.5977	0.0486288	8.50593	0.0209532	0.1704	0.0116106	1.11047	0.0262013	0.0460532	0.00166307	0.119433	0.00209794	0.0331333	0.00397808	0.0199	0.00144711	97.4494	1310	62 × 55	1.19822	0.0548435	38	10.401	1833.26	74.4346	1.14603	0.0589863	35.0241	0.92247	8.36718	0.408236	14.9717	0.585194	0.476354	0.0461599	4.25911	0.51235
1523B-47-ol26	93.6938	0.0082848	57.1245	0.0813528	0.3015	0.00847151	10.0311	0.03565	4.60538	0.0205034	0.0876	0.00645142	15.4471	0.0483582	8.6697	0.0210229	0.1541	0.0116213	1.08033	0.0259612	0.0322573	0.00159879	0.110733	0.0020477	0.0236333	0.00400932	0.0191333	0.00143436	97.0326	1310	67 × 59	1.20217	0.0251385	38	19.645	1855.39	60.0165	0.712311	0.0412261	34.6365	0.810148	8.64083	0.310723	15.1143	0.495281	0.477755	0.0339842	4.65706	0.567204
1523B-47-ol27	93.7408	0.0117582	56.6815	0.0807218	0.317133	0.00854089	10.1112	0.0358045	4.69772	0.0206734	0.0885667	0.00650476	15.7725	0.0491737	8.558	0.0210814	0.170133	0.0117167	1.08357	0.0259974	0.0460484	0.0016509	0.2179	0.00261394	0.0375	0.00409233	0.0185	0.00142606	97.1552	1310	57 × 51	1.26505	0.00962638	38	18.782	1867.46	58.4688	1.10562	0.0536336	38.0917	0.88814	8.51176	0.347081	15.2842	0.508378	0.495182	0.0324012	4.76928	0.501332
1523B-47-ol28-i1	93.7609	0.00394449	57.0888	0.0813019	0.3113	0.00852352	10.057	0.0358713	4.54771	0.0204217	0.0823667	0.00639851	15.7078	0.048972	8.53667	0.0210289	0.207067	0.0118112	1.0608	0.0257915	0.0294303	0.00158785	0.1006	0.00199038	0.0300333	0.00390081	0.0173333	0.00141555	97.0881	1310	56 × 51	1.35034	0.0411821	38	18.779	1857.92	60.6123	0.70465	0.0439631	34.1699	0.869925	8.22722	0.268694	14.682	0.483393	0.480934	0.0311145	4.32509	0.454548
1523B-47-ol28-i2	93.7609	0.00394449	57.0888	0.0813019	0.3113	0.00852352	10.057	0.0358713	4.54771	0.0204217	0.0823667	0.00639851	15.7078	0.048972	8.53667	0.0210289	0.207067	0.0118112	1.0608	0.0257915	0.0294303	0.00158785	0.1006	0.00199038	0.0300333	0.00390081	0.0173333	0.00141555	97.0881	1310		1.35034	0.0411821	38	9.823	1802.43	65.1435	0.561374	0.0562847	33.0125	1.02464	8.24184	0.469551	14.512	0.625677	0.464726	0.0398484	3.7969	0.50972
1523B-47-ol3	93.7611	0.00681535	56.7611	0.0808352	0.305	0.00850818	10.1452	0.035925	4.41371	0.0201031	0.0861333	0.00653108	15.617	0.048689	8.5607	0.0210881	0.1891	0.0118591	1.03843	0.0254524	0.0347206	0.00162181	0.1711	0.00239288	0.0261333	0.00397444	0.0251333	0.00147479	96.705	1310	53 × 39	1.28194	0.0117572	38	12.856	1842.99	58.7951	0.793592	0.0469592	35.2607	0.979375	8.31693	0.417214	14.8713	0.522958	0.489372	0.0400946	4.57898	0.591572
1523B-47-ol4	93.6776	0.0261666	57.3189	0.0816297	0.3095	0.00851494	10.1384	0.0359009	4.65492	0.0206043	0.0952667	0.00653518	15.5768	0.0485637	8.59167	0.0211644	0.165467	0.0115793	1.0989	0.0259998	0.036626	0.00163045	0.1459	0.00225575	0.0261	0.00429731	0.0208667	0.0014456	97.4677	1310	66 × 66	1.10432	0.0379141	38	20.801	1810.5	56.6577	0.790735	0.0442709	34.828	0.791339	8.24457	0.267421	14.8707	0.483699	0.490868	0.0405024	4.50456	0.418278
1523B-47-ol5	93.6665	0.00443973	57.2765	0.0815692	0.331	0.00867033	10.7812	0.0369321	4.75204	0.0208513	0.0924	0.00649414	14.6649	0.0474141	9.01847	0.0215215	0.151033	0.0118258	1.185	0.0270791	0.0362911	0.00161146	0.108367	0.00204686	0.0291	0.00394759	0.00586667	0.00135122	97.85	1310	72 × 55	0.552633	0.0249209	38	10.398	1929.38	75.986	0.705695	0.0623347	35.9378	1.20268	8.36932	0.469996	14.9154	0.746484	0.514305	0.0566322	4.4955	0.731159
1523B-47-ol6	93.5868	0.0295391	56.8965	0.0810281	0.314167	0.00857705	10.1795	0.0360466	4.61191	0.0205324	0.0868667	0.00649071	15.7648	0.0491497	8.5907	0.021162	0.175733	0.0117767	1.11193	0.0261088	0.0551254	0.00171654	0.347767	0.00317239	0.0315667	0.00400719	0.0137333	0.00140886	97.5171	1310	48 × 48	1.22662	0.0137546	38	10.834	1948.38	64.2333	1.2389	0.0612544	41.4245	1.05104	8.22052	0.327169	15.5631	0.61955	0.520103	0.0447707	4.9811	0.899346
1523B-47-ol7	93.5505	0.00201108	57.0524	0.08125	0.3093	0.00850154	10.0944	0.0357452	4.56379	0.0203766	0.0942333	0.00644544	15.4816	0.0484664	8.5213	0.020991	0.1962	0.0117512	1.11183	0.0262617	0.032365	0.00158957	0.116833	0.00209259	0.0259333	0.0038629	0.0175333	0.00144683	96.9802	1310	67 × 55	1.10284	0.0206009	38	6.067	1820.91	88.4244	0.637367	0.0665817	32.894	1.08608	8.15372	0.485458	14.1984	0.675485	0.50967	0.0540082	4.14071	0.960579
1523B-47-ol8	93.6451	0.0153618	56.5267	0.0819583	0.300167	0.0084423	9.85273	0.0353954	4.8361	0.021034	0.0950333	0.00650018	16.0157	0.0491109	8.36933	0.0207246	0.194333	0.0119144	1.04037	0.0255425	0.0419818	0.00164821	0.277333	0.00288571	0.0250667	0.00383698	0.0219333	0.00145959	96.9577	1310	45 × 45	1.56673	0.052807	38	13.289	1861.84	78.3766	0.941064	0.051889	37.3742	1.0564	8.08008	0.388419	15.3375	0.587629	0.490887	0.0401581	4.03057	0.640427
1523B-47-ol9	93.8196	0.0105774	57.7212	0.0822025	0.309667	0.00850865	10.3038	0.0362227	4.70248	0.0207547	0.0887333	0.00647747	15.7037	0.0489593	8.63163	0.0211527	0.162767	0.0116311	1.08513	0.0260236	0.0340496	0.00157899	0.1091	0.00204519	0.031	0.00403294	0.0204	0.0014529	98.3456	1310	100 × 79	1.09229	0.0115783	38	8.523	1844.56	49.0347	0.743721	0.0380733	35.1225	0.716493	8.25948	0.245308	14.8786	0.457819	0.466505	0.0275343	4.66386	0.401896
2217-48-ol10	93.55	0.0087511	56.6415	0.097174	0.275533	0.0108709	9.51671	0.0577821	5.62071	0.0573751	0.110733	0.00735564	18.51	0.0613427	7.96353	0.0505671	0.240233	0.0127909	1.04283	0.0361084	0.0485	0.00347165	0.270833	0.00323694	0.0245333	0.00659338	0.021517	0.00154912	99.909	1350	95 × 81	1.05985	0.0297062	38	25.014	1702.33	85.17	0.985414	0.049	35.7378	0.77	7.55981	0.29	13.8009	0.299	0.476495	0.0369	4.4352	0.223
2217-48-ol100	93.68	0.0174541	57.3786	0.126912	0.288833	0.0087734	9.82976	0.0653133	5.24435	0.0267401	0.0977333	0.00901172	17.5181	0.154099	8.40693	0.0584511	0.265367	0.0133514	0.984633	0.0287442	0.0292	0.00262606	0.101633	0.00236292	0.0213333	0.00489265	0.0138134	0.00162932	99.8081	1350	50 × 49	1.0226	0.028232	38	16.124	1793.39	53.2327	0.566213	0.0343669	33.0201	0.649235	8.04275	0.30357	14.2065	0.54374	0.444501	0.0393136	4.79127	0.461897
2217-48-ol17	93.38	0.0157838	57.0846	0.161323	0.280567	0.0138917	9.61335	0.0650453	5.1901	0.0309738	0.101767	0.00779143	18.4876	0.0936895	7.97283	0.0542224	0.2889	0.0355921	1.0016	0.0623059	0.0309	0.0036438	0.109233	0.00343832	0.0257	0.00544741	0.0280916	0.00215086	99.8482	1350	60 × 51	1.13285	0.0199017	38	19.033	1683.05	51.2563	0.56782	0.0330869	30.0702	0.624197	7.50317	0.331023	13.4915	0.409737	0.450057	0.0267307	4.22419	0.441051
2217-48-ol18	93.6	0.0279824	56.8586	0.204526	0.275667	0.0093927	9.57857	0.0494264	5.19763	0.0325273	0.0991	0.014737	18.0911	0.065	8.04537	0.037026	0.2603	0.0161644	0.986933	0.0334678	0.0269333	0.00204077	0.0575	0.00232536	0.0257667	0.00483302	0.0253022	0.00181586	99.1613	1350	84 × 68	0.971761	0.0240802	38	24.004	1725	42.877	0.54411	0.0342456	30.5576	0.636442	7.67844	0.264032	13.4644	0.419054	0.453992	0.0296784	4.36709	0.472002
2217-48-ol2	93.38	0.00930981	57.1022	0.149765	0.269867	0.0126266	9.63616	0.0473514	5.2393	0.0351441	0.1022	0.00969808	18.4538	0.0604773	7.9451	0.0267881	0.238733	0.016665	0.981767	0.0264883	0.0318667	0.00224436	0.100133	0.00240791	0.0261667	0.0047648	0.0266969	0.00202707	99.7855	1350	93 × 71	0.992499	0.0554481	38	14.063	1645.45	50.5206	0.576944	0.0445147	30.9929	0.85046	7.45593	0.343658	13.1555	0.541383	0.457559	0.037789	4.14081	0.471195
2217-48-ol21	93.54	0.00748366	57.0482	0.117718	0.283067	0.00886132	9.58534	0.0673981	5.28155	0.0514537	0.1023	0.0105241	18.1389	0.11259	8.2438	0.070809	0.288633	0.0168819	0.965367	0.0272482	0.0248	0.00209371	0.0488667	0.00216855	0.0188667	0.00869123	0.0281247	0.00206103	99.6869	1350	69 × 63	0.859859	0.06	38	25.176	1705.75	43.7277	0.49098	0.0299402	30.3055	0.610928	7.9159	0.272539	13.6925	0.407847	0.465013	0.0254049	4.36632	0.488653
2217-48-ol24	93.41	0.0231986	56.2859	0.0875298	0.273133	0.0106919	9.26238	0.0472195	5.61951	0.0347504	0.1032	0.0107299	18.7807	0.104371	7.7468	0.06254	0.322867	0.0157349	0.923933	0.0298405	0.0401333	0.00238618	0.168667	0.00493096	0.0243667	0.00728558	0.0279585	0.00306009	99.2024	1350	43 × 40	1.31662	0.0337009	38	13.465	1649.75	50.2433	0.800188	0.05143	33.1564	0.661701	7.17062	0.273186	13.4681	0.455264	0.413239	0.0340745	4.53601	0.644606
2217-48-ol28	93.61	0.021975	56.5279	0.0873022	0.283967	0.00942485	9.61655	0.0414452	5.25308	0.0273857	0.0996333	0.00684444	18.2325	0.122059	8.06513	0.0315827	0.253033	0.0223005	0.9919	0.0485008	0.0307333	0.00339854	0.0928333	0.00372417	0.0266667	0.00495815	0.0296855	0.00224027	99.1372	1350	65 × 54	1.12003	0.00679696	38	17.118	1719.93	55.3306	0.567041	0.0295984	31.0316	0.601274	7.73877	0.253779	13.4241	0.403329	0.449352	0.0317339	4.21778	0.449641
2217-48-ol30	93.45	0.0151617	56.2777	0.0867131	0.261433	0.0143738	9.30846	0.0705009	5.78574	0.0252804	0.106467	0.0115871	17.5819	0.394493	8.18533	0.0484005	0.300867	0.0160419	0.8961	0.0414014	0.0444667	0.00188764	0.2926	0.00719025	0.028	0.00631013	0.0266968	0.00343613	98.7099	1350	60 × 37	1.41954	0.0403186	38	13.717	1718.85	60.9193	0.96279	0.0437284	35.6554	0.778635	7.74043	0.316523	13.5464	0.494397	0.457357	0.0359304	4.18471	0.542602
2217-48-ol32	93.66	0.0174156	57.0611	0.2977	0.291833	0.0195161	9.88313	0.0953848	5.43843	0.0572414	0.1036	0.00701803	16.7786	0.46211	8.31937	0.0663222	0.278367	0.0127443	0.988	0.0369845	0.0313667	0.00247692	0.1237	0.00222056	0.0224	0.0062535	0.0178312	0.0037255	98.9595	1350	56 × 50	1.18815	0.0523489	38	14.022	1758.83	64.0061	0.657598	0.0377226	32.7627	0.863472	7.97475	0.355383	13.8351	0.437059	0.470336	0.0327071	4.21396	0.502789
2217-48-ol33	93.54	0.0489909	56.8663	0.119935	0.279633	0.00927289	9.61953	0.0468092	5.21699	0.0267086	0.0973	0.0083268	18.466	0.0961685	7.93393	0.0247109	0.258367	0.0136916	1.01623	0.0358579	0.0392	0.00256243	0.158833	0.00424298	0.0269333	0.00450612	0.0236086	0.00384019	99.6363	1350	86 × 62	1.04825	0.0167342	38	15.396	1695.09	57.375	0.741572	0.0627276	32.2011	0.855954	7.46459	0.328827	13.4706	0.464486	0.483641	0.0377686	4.23834	0.469877
2217-48-ol34	93.73	0.00942097	56.3104	0.164582	0.269967	0.0102343	9.3964	0.0422198	5.16872	0.0238899	0.0979667	0.00759837	18.5782	0.0831217	7.79863	0.0317256	0.280533	0.0150563	0.9749	0.0449705	0.0343	0.00249991	0.1616	0.00259122	0.0289667	0.006119	0.026431	0.00371451	98.7639	1350	57 × 46	1.24109	0.0100001	38	15.604	1654.11	51.7247	0.67677	0.0399525	31.1666	0.673533	7.47667	0.26592	13.3897	0.498364	0.449322	0.0291525	4.41579	0.481038
2217-48-ol35	93.68	0.00549705	56.9254	0.09959	0.287767	0.0128818	9.52812	0.0514816	5.23431	0.0324308	0.0982667	0.0135136	18.2596	0.0732562	8.0545	0.0545405	0.243833	0.014877	0.991967	0.0380605	0.0316333	0.00230703	0.0998	0.00290317	0.0222333	0.00514366	0.0163369	0.00166582	99.4248	1350	81 × 51	1.04866	0.0287013	38	17.578	1692.99	34.0543	0.599498	0.0261542	31.4743	0.591773	7.65019	0.201671	13.5869	0.295335	0.443034	0.0220605	4.08601	0.288031
2217-48-ol37	93.58	0.00883984	56.091	0.102751	0.2815	0.009069	9.63804	0.0459251	5.27622	0.0496732	0.0975333	0.00764326	18.069	0.156762	8.1399	0.0481566	0.3389	0.0156621	1.0096	0.0355653	0.0482333	0.00272106	0.271333	0.00416619	0.0281667	0.00636657	0.0233432	0.00274114	98.9479	1350	47 × 38	1.20693	0.0195312	38	13.842	1755.07	58.6341	1.06519	0.0508209	36.7013	0.908395	7.56134	0.282082	14.0201	0.467485	0.413856	0.0303769	4.01751	0.47043
2217-48-ol38	93.57	0.016309	56.1737	0.108425	0.276533	0.0133607	9.55483	0.0417399	5.13165	0.0311932	0.0961	0.0071417	17.9486	0.0763844	8.14387	0.0289308	0.2855	0.0222014	0.982033	0.0349496	0.0337333	0.00306123	0.139333	0.00300484	0.0222333	0.00763982	0.0263649	0.00174608	98.4526	1350	61 × 54	1.00349	0.035593	38	17.253	1723.58	56.9067	0.625807	0.0354373	31.9278	0.665226	7.59016	0.29505	13.8074	0.408063	0.451474	0.028928	4.21682	0.417565
2217-48-ol41	93.52	0.015521	57.0407	0.129453	0.271967	0.0107484	9.526	0.041336	5.27904	0.0333417	0.0937	0.00864421	18.4341	0.0623839	8.00337	0.0297357	0.239167	0.0142213	0.962033	0.0381294	0.0338	0.00357523	0.109333	0.00214352	0.0235333	0.00725232	0.0253022	0.00236531	99.6716	1350	82 × 70	1.08736	0.0205806	38	23.277	1690.43	51.0364	0.622296	0.0344175	31.7233	0.666672	7.51039	0.257104	13.3748	0.360692	0.463214	0.0308037	4.10004	0.496114
2217-48-ol45	93.51	0.0132968	56.3835	0.113301	0.279467	0.0104396	9.53747	0.0397178	5.24659	0.0353643	0.1033	0.00743935	18.0604	0.108798	8.0917	0.0747054	0.321	0.0169039	1.00767	0.0269916	0.0289333	0.00375778	0.0893667	0.00221748	0.0221667	0.0045174	0.0244058	0.00169061	98.8294	1350	53 × 44	1.04995	0.00877026	38	19.001	1710.98	58.6593	0.606734	0.0381377	31.4451	0.595911	7.87492	0.275718	13.4981	0.417691	0.465776	0.040223	4.03862	0.414219
2217-48-ol47	93.66	0.00681567	56.9359	0.0965681	0.2862	0.0100599	9.71963	0.0475692	4.98887	0.0345497	0.0848667	0.0108505	18.0254	0.132978	8.08377	0.0782017	0.2503	0.0150726	0.9936	0.0499795	0.0268	0.00259376	0.0395667	0.00207878	0.0209667	0.00699282	0.0177316	0.00227204	99.1129	1350	53 × 40	1.05227	0.0306117	38	10.471	1717.51	58.6189	0.434083	0.0324253	30.2385	0.935837	7.83686	0.311333	13.598	0.541376	0.440356	0.0475518	4.42101	0.548975
2217-48-ol52	93.49	0.0288525	56.5239	0.109691	0.282167	0.00963332	9.45852	0.0459755	5.47773	0.0297823	0.0989	0.00934814	18.76	0.0594451	7.85447	0.0350238	0.272233	0.0176883	1.02667	0.0431953	0.0497	0.00194733	0.290667	0.00582702	0.0232	0.00414468	0.022347	0.00164313	99.7678	1350	68 × 61	1.2482	0.016529	38	15.518	1729.94	43.0236	1.03363	0.0483507	36.5227	0.825963	7.45536	0.258423	13.6303	0.496248	0.477814	0.0294437	4.08069	0.554281
2217-48-ol59	93.5	0.0228421	56.8775	0.121292	0.286033	0.0152619	9.71025	0.0484901	5.33034	0.0284399	0.102467	0.00712384	17.8943	0.0629007	8.1123	0.0213583	0.250033	0.0340234	1.0468	0.0360436	0.0374333	0.00328716	0.125867	0.00404787	0.0242333	0.00632837	0.0224799	0.00197797	99.4488	1350	73 × 65	0.761578	0.00262874	38	13.942	1745.58	45.4307	0.699189	0.0467721	33.3845	0.975355	7.56743	0.32927	14.0669	0.432179	0.458851	0.0298113	4.08047	0.42905
2217-48-ol63	93.54	0.00212454	56.5799	0.683057	0.276033	0.00946438	9.50428	0.096751	5.1475	0.110853	0.0882667	0.00790293	17.9849	0.272392	8.00067	0.154747	0.246733	0.0344758	0.967033	0.0338996	0.0275333	0.00195248	0.0575667	0.00221343	0.0252333	0.00658334	0.0321093	0.00172883	98.5725	1350	70 × 52	0.930149	0.118608	38	19.033	1707.83	45.2343	0.54401	0.0379986	30.8078	0.690585	7.60371	0.279978	13.3737	0.539362	0.448288	0.0347257	4.40951	0.420479
2217-48-ol65	93.64	0.0194505	57.0904	0.151527	0.2758	0.0119472	9.44229	0.0578832	5.46741	0.0472384	0.109867	0.00748604	18.4309	0.0898636	7.91213	0.0334403	0.197867	0.0224581	0.9855	0.0374955	0.0324	0.00240945	0.0979667	0.00242609	0.0215	0.00810866	0.027062	0.00287998	99.714	1350	115 × 90	0.971754	0.145442	38	28.933	1643.95	21.8583	0.61041	0.0161964	31.2155	0.332758	7.46934	0.126905	13.1338	0.19606	0.457111	0.0142311	4.17147	0.203618
2217-48-ol68	93.3	0.0301842	56.012	0.0918078	0.280333	0.00903292	9.39187	0.039771	5.61979	0.0373246	0.104767	0.0105936	18.4462	0.227291	7.91757	0.0851079	0.3343	0.0151254	0.956567	0.0321282	0.0364333	0.00219537	0.177267	0.00408859	0.0255333	0.0043527	0.0273942	0.00174547	98.9546	1350	48 × 42	1.06602	0.0687559	38	12.836	1719.58	58.6604	0.774308	0.049699	33.2685	0.878791	7.97698	0.289211	13.8312	0.665198	0.45901	0.0390509	3.99162	0.55766
2217-48-ol70	93.52	0.0221759	57.2332	0.149025	0.279933	0.00906338	9.72698	0.0726916	5.27358	0.0309908	0.0925333	0.00837312	18.433	0.0916681	8.0389	0.0597597	0.2922	0.0155177	1.00747	0.04392	0.0342667	0.00240732	0.1233	0.00382309	0.0245333	0.00525834	0.0280252	0.00268122	100.218	1350	52 × 41	1.1451	0.0195577	38	14.849	1689.54	55.4705	0.658573	0.0335611	31.9627	0.90143	7.58953	0.303951	13.4766	0.488756	0.447542	0.0362041	4.04134	0.477603
2217-48-ol75	93.46	0.0214678	57.0238	0.126818	0.280967	0.0164512	9.71025	0.0508051	5.18687	0.0336404	0.1012	0.00986348	18.037	0.0857587	8.08217	0.067751	0.306267	0.0132147	1.0155	0.0461256	0.0325333	0.00215791	0.0982	0.00254656	0.0265333	0.0046215	0.0284568	0.00215022	99.5624	1350	39 × 38	1.0002	0.0649099	38	11.972	1762.52	58.431	0.688381	0.036325	35.0539	0.795945	7.78633	0.387487	13.7302	0.523186	0.442445	0.0405391	4.1885	0.578396
2217-48-ol77	93.44	0.01892	56.245	0.180103	0.272167	0.0124393	9.40801	0.0556616	5.57299	0.0334398	0.109333	0.00902486	18.0907	0.0826101	8.03633	0.0544958	0.281333	0.0168101	0.9922	0.0324495	0.0456	0.00220708	0.2592	0.00382957	0.0204333	0.00759492	0.0300174	0.00212628	98.9867	1350	61 × 56	1.0751	0.0260258	38	23.549	1710.66	55.7671	0.963466	0.0437134	35.9838	0.726812	7.36647	0.247418	13.8999	0.395534	0.488773	0.0307251	4.34924	0.424668
2217-48-ol79	93.27	0.0243159	56.8457	0.0952009	0.279167	0.0173102	9.55367	0.0558507	5.27406	0.0353339	0.0999	0.00859423	18.2111	0.061072	7.97963	0.0270518	0.2534	0.0310313	1.01477	0.0298404	0.0274333	0.00228801	0.0569333	0.00284431	0.0239667	0.00450107	0.0319433	0.00189022	99.2821	1350	63 × 66	0.876488	0.0415196	38	17.457	1673.5	30.8838	0.477034	0.0250615	30.1393	0.526944	7.61961	0.206804	13.5075	0.349169	0.42513	0.0213091	3.88134	0.32992
2217-48-ol8	93.71	0.0270953	56.4476	0.170685	0.2829	0.0155638	9.55708	0.052266	5.29678	0.045788	0.102433	0.0101048	18.473	0.0570375	7.93453	0.0218221	0.239633	0.0137531	1.01623	0.0305991	0.0523667	0.00332311	0.287533	0.00649479	0.0237333	0.00589659	0.00923114	0.00280874	99.3561	1350	48 × 39	0.986003	0.0944603	38	18.306	1703.58	34.5939	1.0057	0.0412187	35.1561	0.516002	7.33322	0.181803	13.2763	0.301843	0.441666	0.0233046	4.29625	0.34185
2216-48-ol1	93.05	0.00331273	54.8828	0.164717	0.288767	0.0118996	9.30463	0.0492756	6.20287	0.0582385	0.112395	0.00773887	18.1534	0.234031	7.91307	0.151617	0.261767	0.0159096	1.05667	0.0328502	0.0461	0.0028131	0.263033	0.00682759	0.0223333	0.00455307	0.0177	0.00269937	98.5257	1350	41 × 38	1.18807	0.0250791	38	13.093	1729.83	55.804	0.9005	0.0511133	37.0592	1.11336	7.60174	0.338049	13.7871	0.504111	0.461261	0.0375281	4.1875	0.563987
2216-48-ol10	92.88	0.00868366	55.628	0.127668	0.2911	0.0123507	9.47553	0.0638299	5.41343	0.046608	0.0980669	0.0072195	17.9887	0.139222	8.08057	0.0562236	0.267867	0.0146286	1.10937	0.0279656	0.0365333	0.00242321	0.123433	0.00251031	0.0298667	0.00464041	0.0250667	0.00163538	98.5689	1350	66 × 50	0.950834	0.0311709	38	17.291	1769.45	42.8524	0.671725	0.0444476	32.8993	0.87177	7.77163	0.383371	13.8241	0.461115	0.434554	0.031302	4.57691	0.477778
2216-48-ol12	92.92	0.00294569	55.0474	0.0921745	0.289367	0.00943845	9.57603	0.0891058	5.33587	0.0457728	0.0998346	0.0160182	18.0718	0.0880576	8.01603	0.0283079	0.298833	0.0196202	1.1517	0.061477	0.0507333	0.00186117	0.284867	0.00341841	0.0283	0.00663244	0.0255667	0.00178357	98.2775	1350	57 × 45	1.02903	0.0232394	38	6.668	1727.59	69.1977	0.870339	0.0553774	36.1529	1.34489	7.4761	0.336287	13.3741	0.568789	0.42689	0.06523	4.59031	0.610466
2216-48-ol14	92.9	0.0051861	55.8283	0.18271	0.2817	0.0107141	9.31607	0.0571303	5.79043	0.0698883	0.109848	0.00904756	18.2595	0.183946	7.97283	0.103225	0.317	0.0139116	1.08883	0.046108	0.0317333	0.00243229	0.114933	0.00254229	0.0250667	0.0068439	0.0272667	0.00175476	99.1664	1350	45 × 45	1.18828	0.00344076	38	11.445	1721.62	41.1117	0.573133	0.0455273	32.4613	0.854907	7.45794	0.365451	13.713	0.74247	0.488731	0.038835	4.11861	0.474953
2216-48-ol17	93	0.0133596	56.0993	0.14884	0.290433	0.0108094	9.76939	0.0483143	5.71543	0.0286329	0.1032	0.00801955	17.9557	0.130013	8.14443	0.0548422	0.305567	0.0181914	1.0775	0.0344978	0.0417	0.00199764	0.1878	0.00330145	0.0224667	0.0054042	0.0217493	0.00165013	99.3571	1350	43 × 37	0.874978	0.028088	38	11.073	1786.8	48.9262	0.792787	0.0482186	35.5212	0.933448	7.72981	0.354972	14.2352	0.496399	0.503286	0.0440569	4.75332	0.604815
2216-48-ol2	93.06	0.0143596	55.263	0.133374	0.287767	0.00971942	9.26313	0.0455455	5.62533	0.0414862	0.104913	0.00800756	18.7245	0.0647192	7.79567	0.0292634	0.3056	0.0152729	1.10953	0.030771	0.0538667	0.00302306	0.311433	0.00408825	0.0186667	0.00557934	0.0249	0.00220319	98.8909	1350	52 × 51	1.23418	0.0121127	38	10.948	1730.57	42.2108	1.01267	0.0505659	37.9854	0.891203	7.39744	0.291219	13.4946	0.498241	0.465398	0.0327802	4.19437	0.465758
2216-48-ol24	92.97	0.0179275	55.1219	0.195858	0.2967	0.0157966	9.4571	0.0427796	5.7745	0.0391019	0.113098	0.0139666	18.1515	0.0735202	8.0243	0.0361639	0.2491	0.0263172	1.15683	0.032548	0.0581667	0.00199373	0.314967	0.00323694	0.0255667	0.00522859	0.0266	0.0018756	98.77	1350	85 × 83	1.50515	0.0511751	38	24.7	1770.64	49.4808	1.09001	0.0455621	38.8546	0.675045	7.82813	0.256737	14.23	0.40281	0.520999	0.029913	4.70221	0.480146
2216-48-ol3	93.07	0.00177816	55.7949	0.242592	0.288333	0.0108729	9.8055	0.0599075	5.32183	0.0457982	0.0998403	0.00668189	17.8623	0.107669	8.1599	0.0582596	0.298933	0.0144428	1.17147	0.0404364	0.0365667	0.00199776	0.0920333	0.00317578	0.0312667	0.00578011	0.0251333	0.00174023	98.9884	1350	52 × 41	0.850641	0.0121646	38	14.064	1742.27	46.2467	0.609186	0.0413901	34.3689	0.739222	7.92581	0.371353	14.0828	0.467113	0.432112	0.0356287	4.78899	0.607164
2216-48-ol7	92.89	0.00757421	55.6853	0.0793031	0.291133	0.00797135	9.31417	0.0332217	5.96453	0.026784	0.107283	0.00833409	18.0938	0.0564108	7.94343	0.0195675	0.303233	0.0172966	1.02817	0.0249981	0.0417333	0.00225163	0.1943	0.00384424	0.0266	0.00345488	0.0234333	0.00191371	99.0191	1350	43 × 34	1.26002	0.0109629	38	10.53	1714.22	54.5069	0.779228	0.0563371	34.3413	1.01262	7.46707	0.369669	13.8015	0.639765	0.451541	0.0354437	3.90059	0.497825
2216-48-ol8	92.81	0.00557199	55.863	0.200782	0.287633	0.0147043	9.45403	0.0569801	5.44083	0.0302643	0.102996	0.00937174	18.1694	0.0836944	7.9619	0.0293099	0.265033	0.013151	1.15497	0.0335466	0.0340667	0.00185996	0.0872667	0.00277828	0.0231667	0.0052814	0.0294667	0.00180615	98.8756	1350	63 × 60	0.959605	0.00387495	38	19.02	1707.31	45.0986	0.607132	0.0426994	31.9275	0.762315	7.72197	0.253919	13.859	0.388256	0.467997	0.0305612	4.55405	0.440599
1528B-38-ol10	93.0807	0.00788333	56.8688	0.185771	0.3023	0.0184403	10.5851	0.0783297	4.7798	0.0513032	0.0907	0.0149957	15.533	0.0880203	8.295	0.115577	0.1719	0.0169837	1.1537	0.0759135	0.0516	0.00609568	0.2553	0.00708032	0.0293	0.0165057	0.0248	0.00599995	98.1413	1300	45 × 57	1.36882	0.0734306	20	6.087	1732.69	76.9597	0.922926	0.107562	36.1552	1.58836	7.45068	0.608594	14.0423	0.889955	0.396632	0.06617	4.10478	0.985395
1528B-38-ol12	93.2177	0.00784774	58.0549	0.185776	0.2942	0.0184365	10.7035	0.0784923	4.5451	0.0499961	0.0834	0.0150176	15.0248	0.0871438	8.4991	0.117288	0.1793	0.0167705	1.1528	0.077007	0.0354	0.0060062	0.1453	0.00598636	0.0182	0.0169272	0.026	0.00600253	98.7621	1300	38 × 38	1.1504	0.057813
1528B-38-ol16	92.9596	0.00780741	57.9844	0.18555	0.2991	0.0183448	10.5359	0.0779657	4.4068	0.0493562	0.0879	0.0151012	15.0016	0.0870093	8.3116	0.116362	0.1869	0.01712	1.2157	0.0773996	0.0503	0.00614331	0.2084	0.0066688	0.0207	0.017123	0.0332	0.00610437	98.3425	1300	42 × 41	1.10433	0.0593188
1528B-38-ol21-I1	92.6621	0.00382158	58.6756	0.187762	0.3076	0.0182099	10.588	0.0783512	4.2773	0.0479058	0.0819	0.0199399	14.6203	0.0847977	8.7154	0.122597	0.1748	0.014823	1.1523	0.074669	0.05	0.00596333	0.2569	0.00837494	0.0397	0.0227296	0.0285	0.0068324	98.9684	1300	41 × 42	1.15716	0.0589806
1528B-38-ol21-I2	92.6621	0.00382158	58.2618	0.186438	0.3141	0.0185947	10.8216	0.0800798	4.6961	0.0525963	0.0922	0.0224476	14.1245	0.0819221	8.9028	0.125233	0.2005	0.0170024	1.1649	0.0754855	0.0508	0.00605875	0.2214	0.00721764	0.0294	0.0168325	0.0283	0.00678445	98.9085	1300	38 × 32	1.25983	0.0664511
1528B-38-ol22	93.0507	0.00784498	57.7109	0.188522	0.2998	0.0187075	10.844	0.0795227	4.6151	0.0504584	0.0746	0.0150493	15.1562	0.0868955	8.4452	0.117107	0.1914	0.0169708	1.1798	0.0773949	0.0393	0.00610984	0.2465	0.00698417	0.0292	0.0170801	0.0271	0.00586444	98.8591	1300	41 × 31	1.11567	0.0558812
1528B-38-ol24	92.9631	0.00783738	57.4541	0.187683	0.2971	0.0184598	10.366	0.0780905	4.8719	0.0516421	0.0908	0.0152907	15.5265	0.0879835	8.3159	0.115868	0.1911	0.0170971	1.1425	0.0764713	0.0601	0.00621033	0.338	0.00781907	0.0296	0.0173831	0.0271	0.00582289	98.7108	1300	40 × 40	1.30891	0.05
1528B-38-ol27	92.8346	0.00381273	56.9125	0.185914	0.2632	0.0179678	10.1005	0.0767638	5.1581	0.0533004	0.1029	0.0153047	15.9522	0.0893323	7.7447	0.112556	0.2591	0.0177224	1.0723	0.0753469	0.0495	0.0061875	0.2859	0.00739528	0.0215	0.0168632	0.0259	0.00596391	97.9483	1300	35 × 32	1.52889	0.189807
1528B-38-ol2-I1	93.0901	0.00786656	57.876	0.189062	0.2932	0.0185889	10.6138	0.0785421	4.7825	0.0513322	0.082	0.0153613	15.2428	0.0873921	8.2412	0.115926	0.1902	0.0172448	1.2221	0.0777256	0.0356	0.00594045	0.0888	0.0052392	0.0224	0.0167179	0.0346	0.00613343	98.7253	1300	38 × 43	1.31872	0.0658886
1528B-38-ol2-I2	93.0901	0.00786656	58.7977	0.188153	0.3164	0.0185199	10.8142	0.0793041	4.1584	0.0479602	0.0837	0.014999	14.6881	0.0861702	8.4996	0.117294	0.198	0.0174372	1.1801	0.0784373	0.0319	0.00591851	0.0978	0.0054116	0.0315	0.0165123	0.0348	0.00605056	98.9323	1300	36 × 41	1.21	0.04
1528B-38-ol35-I1	92.9135	0.00779363	57.8256	0.185042	0.2927	0.0187328	10.4682	0.0781626	4.8704	0.0516262	0.0884	0.0153286	15.1262	0.087732	8.2888	0.116043	0.2135	0.0171939	1.1608	0.0780831	0.0557	0.00616785	0.3338	0.00783317	0.0284	0.0161123	0.0217	0.00581705	98.7743	1300	40 × 40	1.23096	0.0625973
1528B-38-ol36	92.961	0.00783341	58.038	0.185722	0.2794	0.0183845	10.7	0.0784667	4.3866	0.0491299	0.0816	0.0151014	14.9622	0.0867808	8.3081	0.116313	0.1752	0.0169827	1.2302	0.0772566	0.0567	0.00618786	0.3079	0.00759487	0.0241	0.0164314	0.0179	0.00586523	98.5679	1300	31 × 37	1.07884	0.0545476
1528B-38-ol5	93.1796	0.00786089	58.4871	0.187159	0.3092	0.0187375	10.8862	0.0791064	4.1519	0.0478852	0.069	0.014835	14.7505	0.0865363	8.3699	0.116621	0.2019	0.0172288	1.2021	0.0774954	0.0318	0.00598264	0.0911	0.00525951	0.0273	0.0165966	0.0256	0.00603648	98.6037	1300	42 × 37	1.25157	0.048555
1528B-38-ol50	92.815	0.00386654	57.1283	0.186619	0.2816	0.0183228	10.3472	0.0779489	4.9992	0.052325	0.1014	0.0151559	15.2458	0.0874093	8.1009	0.114493	0.2001	0.0172219	1.1326	0.0767148	0.0328	0.00598053	0.095	0.00532	0.026	0.0169572			98.0574	1300	34 × 32	1.46106	0.0676036
1528B-45-ol147	92.736	0.0184978	56.6935	0.0785568	0.314822	0.00826677	10.593	0.0354721	4.756	0.0218452	0.0936	0.00683396	14.7329	0.0455554	8.83247	0.0210776	0.182467	0.0121122	1.12197	0.0249466	0.0520333	0.00176746	0.339033	0.00308851	0.0269333	0.00363438	0.0297333	0.00158126	97.767	1300	51 × 44	1.71754	0.04	38	15.064	1843.03	65.6298	1.18808	0.0787568	40.3839	1.48935	8.42406	0.42407	15.3343	0.666552	0.521208	0.0580131	4.51654	0.615057
1528B-45-ol148	92.7745	0.00575186	57.1603	0.0792037	0.322311	0.00830635	10.9765	0.0359112	4.391	0.0210137	0.0886667	0.00675812	14.4756	0.0451306	8.8242	0.0211717	0.130853	0.0119145	1.18867	0.0255758	0.0423	0.00172353	0.2225	0.00260358	0.0262667	0.0036296	0.0253	0.00154656	97.8743	1300	54 × 54	1.26038	0.03
1528B-45-ol149	92.8696	0.0110793	57.2269	0.0792959	0.299972	0.00818251	10.3608	0.0350934	4.96707	0.0222411	0.0949	0.00679632	15.1355	0.0462176	8.48027	0.0206729	0.207686	0.0121612	1.0706	0.0245066	0.0533	0.00177122	0.268	0.00279562	0.0311333	0.00377827	0.0246	0.00153861	98.2185	1300	46 × 36	2.16817	0.03
1528B-45-ol150	92.8516	0.00930977	57.2369	0.0793098	0.317723	0.00831492	10.7416	0.0355562	4.5731	0.0213571	0.0908667	0.00668889	14.8536	0.0457371	8.79757	0.0209943	0.115219	0.0125018	1.19147	0.0255899	0.0597667	0.00181518	0.364933	0.0031932	0.0241667	0.00357679	0.0312	0.00160548	98.3979	1300	76 × 76	1.40663	0.06	20	25.952	1912.3	44.3479	1.3313	0.0628189	41.0686	0.869852	7.97854	0.321218	14.5864	0.414193	0.503981	0.0333021	4.66552	0.45384
1528C-38-ol1	93.0943	0.00994192	57.4802	0.187769	0.2979	0.018589	10.5044	0.0784329	4.6251	0.0505678	0.094	0.0151779	15.132	0.0877656	8.4281	0.11687	0.1982	0.0172038	1.1002	0.0756938	0.0405	0.0059994	0.1737	0.006369	0.0343	0.0175502	0.0279	0.0059985	98.1366	1300	34 × 37	1.23982	0.0693127	20	14.082	1862.61	78.0733	0.642693	0.0775421	36.1324	1.56422	7.94687	0.465097	14.7025	1.05006	0.545779	0.0728142	4.39172	0.835813
1528C-38-ol14	93.1542	0.00984783	57.5943	0.188141	0.3068	0.0186943	10.8184	0.0793349	4.4584	0.0496369	0.0646	0.0152068	14.7053	0.0862711	8.6892	0.118752	0.1644	0.016988	1.1155	0.0760771	0.0307	0.00590873	0.0734	0.00503035	0.0412	0.0171859	0.0153	0.005763	98.0775	1300	51 × 25	1.10245	0.0615673	20	10.528	1925.71	56.4092	0.5173	0.047133	34.4697	1.13648	8.35803	0.438747	15.3334	0.681968	0.476849	0.051445	4.2715	0.460832
1528C-38-ol21-i1	93.4297	0.00990055	58.6756	0.187762	0.3076	0.0187021	10.588	0.0783512	4.2773	0.0487612	0.0819	0.0150751	14.6203	0.0857724	8.7154	0.11911	0.1748	0.0171421	1.1523	0.0752836	0.05	0.00612667	0.2569	0.00715895	0.0397	0.0164332	0.0285	0.0060078	98.9684	1300	41 × 42	0.940755	0.0525282	20	15.111	1867	80.8363	1.00721	0.0747545	37.99	1.16446	7.81347	0.40166	14.4855	0.676264	0.437558	0.0501374	4.245	0.486411
1528C-38-ol21-i2	93.4297	0.00990055	58.2618	0.186438	0.3141	0.0187622	10.8216	0.0793584	4.6961	0.051031	0.0922	0.0152253	14.1245	0.084747	8.9028	0.119891	0.2005	0.0173633	1.1649	0.0770387	0.0508	0.00606213	0.2214	0.00680436	0.0294	0.0171088	0.0283	0.00587508	98.9085	1300	38 × 32	0.889997	0.0497506	20	24.37	1979.15	82.6644	0.970508	0.0893983	37.2256	1.31259	8.81464	0.498406	15.0989	1.01147	0.535323	0.0724821	4.94101	0.752245
1528C-38-ol23	93.256	0.00997691	58.2763	0.186484	0.3103	0.0185766	10.8529	0.0795879	4.5734	0.0503074	0.0862	0.0150505	14.5321	0.0862238	8.6977	0.118869	0.2363	0.0176437	1.0689	0.0742529	0.0415	0.00606177	0.134	0.00586027	0.0326	0.017504	0.0203	0.00598038	98.8625	1300	34 × 30	1.0659	0.0596695	20	13.65	1876.34	90.2442	0.741054	0.108668	34.8608	1.5565	7.8276	0.594006	15.7197	1.09166	0.450308	0.0654978	4.71739	0.767414
1528C-38-ol25-i1	93.1072	0.00988941	58.7022	0.187847	0.3176	0.0185478	10.8475	0.0795483	4.2579	0.0485401	0.0704	0.0150187	14.891	0.0863678	8.5112	0.117455	0.215	0.017415	1.2746	0.0785154	0.0407	0.00611585	0.1272	0.00578336	0.033	0.0162602	0.0304	0.00607189	99.3187	1300	47 × 40	0.971925	0.0542633	20	11.574	1833.17	93.0018	0.704374	0.147289	33.6698	1.85097	7.904	0.53303	14.4295	1.05333	0.433278	0.0709575	4.48878	0.849962
1528C-38-ol28	93.266	0.0100554	57.5782	0.188089	0.3097	0.0184788	10.6803	0.0790342	4.625	0.0505667	0.0831	0.0152184	14.9517	0.0867199	8.6961	0.118847	0.182	0.0170716	1.1505	0.078234	0.0448	0.00608384	0.2017	0.00654853	0.0081	0.0167368	0.0138	0.00582636	98.525	1300	31 × 30	1.15578	0.0645548	20	17.989	1915.59	91.0961	0.908272	0.107479	37.2582	1.53311	8.28565	0.446586	14.6105	1.08038	0.467225	0.0635046	4.76982	0.951152
1528C-38-ol30	93.433	0.0099884	57.6044	0.188174	0.2936	0.0184185	10.5679	0.0782025	4.6652	0.0506952	0.0945	0.0154161	14.7923	0.0867815	8.2205	0.115087	0.2593	0.0180819	1.0432	0.0729545	0.035	0.00592433	0.1137	0.0055713	0.0343	0.0167704	0.0296	0.00614891	97.7535	1300	30 × 30	1.36395	0.0761449
1528C-38-ol32	93.1977	0.00987732	58.7022	0.187847	0.3146	0.0186033	10.7968	0.0791765	4.2681	0.0486563	0.0792	0.0147576	14.627	0.0858117	8.532	0.117742	0.1979	0.0174548	1.2228	0.077607	0.0482	0.00612461	0.2189	0.00677131	0.0425	0.0179435	0.0252	0.00602448	99.0755	1300	37 × 34	0.909202	0.0428328
1528C-38-ol34	93.0992	0.01001	57.9332	0.189248	0.3037	0.0185257	10.5833	0.079022	4.6512	0.0508531	0.0955	0.0152482	15.1459	0.0878462	8.5897	0.117965	0.1746	0.0170759	1.2159	0.078304	0.0585	0.0062517	0.3377	0.00792469	0.0275	0.0167017	0.0321	0.00602196	99.1488	1300	57 × 68	1.06702	0.100663	20	20.804	1829.66	69.7739	1.22194	0.100242	39.9859	1.53238	7.89921	0.433825	14.1283	0.907877	0.503978	0.056378	4.40492	0.635515
1528C-38-ol36	93.2694	0.00788874	56.8647	0.185758	0.2843	0.0183847	10.3339	0.0771598	4.1376	0.0479962	0.0888	0.0147645	14.1462	0.0848772	8.4944	0.117223	0.1282	0.016384	1.1625	0.076725	0.0314	0.00580691	0.1055	0.0054438	0.0208	0.0164265	0.0295	0.0059708	95.8279	1300	55 × 45	0.829341	0.0364315
1528C-38-ol37-I1	93.1177	0.00997773	58.1057	0.189812	0.2884	0.0180154	10.377	0.0788652	4.8767	0.0494172	0.1046	0.0154947	15.2668	0.0885474	8.2338	0.115273	0.244	0.0169173	1.0445	0.076527	0.0433	0.00668552	0.238	0.00701307	0.0218	0.0156553	0.0285	0.0055993	98.8732	1300	28 × 30	1.22672	0.0552022	20	7.015	1770.07	88.2856	0.857992	0.125921	36.6629	2.22075	8.27405	0.664819	13.58	1.20812	0.462479	0.103274	5.1555	1.08478
1528C-38-ol37-I2	93.1177	0.00997773	58.1057	0.185938	0.2884	0.0183999	10.377	0.0781734	4.8767	0.0520181	0.1046	0.0152228	15.2668	0.0875297	8.2338	0.115822	0.244	0.0178283	1.0445	0.0725579	0.0433	0.00608798	0.238	0.00693373	0.0218	0.0169197	0.0285	0.0060192	98.8732	1300	28 × 30	1.47619	0.0663544
1528C-38-ol39	92.9671	0.00778092	57.8898	0.185247	0.2967	0.0184547	10.0765	0.0765814	4.9453	0.0520905	0.0793	0.0152626	15.2929	0.0876793	8.1508	0.115198	0.2372	0.0176319	1.0608	0.0741853	0.0596	0.00629376	0.3059	0.00760671	0.0378	0.0157928	0.0289	0.00608634	98.4616	1300	35 × 30	1.29252	0.0567965
1528C-38-ol41	93.1135	0.0099638	57.84	0.188944	0.2926	0.0184533	10.4361	0.0779229	4.6886	0.0509495	0.0867	0.0152997	15.1306	0.0877575	8.2981	0.116173	0.2139	0.0175113	1.1389	0.0764582	0.0378	0.00602532	0.1476	0.0060024	0.034	0.0163291	0.0291	0.00592476	98.374	1300	32 × 38	1.42908	0.0991055	20	9.856	1765.9	230.412	0.77747	0.139316	34.112	1.56584	7.64216	0.534531	13.572	1.41269	0.404551	0.0661306	4.2411	0.880788
1528C-38-ol42	93.3358	0.00994132	57.6359	0.188277	0.297	0.0185922	10.4673	0.0781558	4.7158	0.0509306	0.0907	0.0152557	15.3084	0.0877682	8.3204	0.115931	0.2115	0.017625	1.0932	0.0745562	0.06	0.006144	0.3109	0.00756523	0.0312	0.0164694	0.0261	0.00587076	98.5684	1300	35 × 35	1.52691	0.0785864
1528C-38-ol45	93.1694	0.00786673	58.642	0.187654	0.311	0.0187429	10.7501	0.0788341	4.5419	0.0499609	0.1018	0.0151953	14.9458	0.0866856	8.4922	0.117192	0.157	0.0170607	1.2041	0.0777046	0.0375	0.0059675	0.1623	0.00615658	0.0509	0.0176962	0.0179	0.00570891	99.4146	1300	49 × 43	0.847479	0.0372547	20	6.087	1910.4	86.6823	0.59341	0.0897865	33.5612	1.97071	7.72339	0.932081	15.0573	1.24841	0.483293	0.0772101	5.08424	1.46775
1528C-38-ol46	93.1197	0.0100405	58.294	0.186541	0.3178	0.0186443	11.0921	0.0798631	4.2806	0.0487988	0.0745	0.0149695	14.8572	0.0861718	8.471	0.1169	0.2119	0.0174041	1.1274	0.0756861	0.0408	0.00602752	0.144	0.0059808	0.0368	0.0180148	0.0291	0.00594804	98.9772	1300	32 × 30	1.1609	0.123834
1528C-38-ol48	92.9402	0.0099073	58.2559	0.186419	0.314	0.0186725	10.7935	0.0791523	4.5983	0.0502747	0.0851	0.0149946	14.9285	0.0865853	8.6472	0.118178	0.1799	0.0169226	1.1886	0.0777344	0.0529	0.00621046	0.3078	0.00761292	0.0206	0.0174455	0.0238	0.00595952	99.3962	1300	40 × 45	0.951842	0.0473247	20	18.291	1793.69	63.6476	1.0561	0.106662	38.1591	1.66305	7.72194	0.42465	14.1955	1.03102	0.453986	0.0537996	4.59997	0.727091
1528C-38-ol54-I1	92.9381	0.00781929	58.2605	0.186434	0.3105	0.0191682	10.5484	0.0801678	4.6107	0.048566	0.0792	0.012181	15.103	0.0865905	8.4381	0.118696	0.1828	0.0138319	1.148	0.084952	0.0365	0.00388603	0.2058	0.00524104	0.0217	0.012003	0.0199	0.00480784	98.9652	1300	33 × 35	1.09433	0.0489096
1528C-38-ol54-I2	92.9381	0.00781929	58.2605	0.186434	0.3105	0.0185472	10.5484	0.0787614	4.6107	0.0504103	0.0792	0.0152434	15.103	0.0875974	8.4381	0.117008	0.1828	0.0171954	1.148	0.0750792	0.0365	0.0060006	0.2058	0.00661304	0.0217	0.016968	0.0199	0.00596735	98.9652	1300	33 × 35	1.12645	0.0504896
1528C-38-ol58	93.2704	0.00788514	58.3567	0.186741	0.2885	0.018464	10.4393	0.0779468	4.5725	0.0502975	0.0856	0.0148659	15.1122	0.0876508	8.2298	0.115766	0.2235	0.0175075	1.0978	0.0746504	0.0367	0.00593806	0.1628	0.0061864	0.0235	0.016497	0.0201	0.00604072	98.6491	1300	35 × 34	1.22852	0.05
1528C-38-ol62	93.2398	0.0079148	58.3721	0.186791	0.3354	0.0188495	11.0795	0.0797724	4.2581	0.0485423	0.098	0.0150071	14.8248	0.0859838	8.7637	0.119186	0.223	0.0177359	1.1766	0.0768712	0.0505	0.00619803	0.2588	0.00709112	0.0166	0.0161717	0.0329	0.00614133	99.4901	1300	35 × 37	0.945031	0.0474975
1528C-38-ol63	93.1648	0.00783967	57.4655	0.187721	0.2981	0.0184623	10.1523	0.0771575	4.7036	0.0511125	0.0799	0.0150425	15.0875	0.0875075	8.1435	0.115095	0.2418	0.0176353	1.0732	0.0736931	0.0373	0.00599784	0.1839	0.00642424	0.0205	0.0175084	0.0217	0.00608757	97.5089	1300	28 × 31	1.2554	0.05
1528C-38-ol7	92.4919	0.00974879	58.7581	0.188026	0.339	0.0188484	10.7238	0.0786412	4.7058	0.0508226	0.0919	0.0151758	14.4615	0.0858049	8.6253	0.118454	0.1058	0.0161592	1.2339	0.0780647	0.0692	0.00630181	0.3417	0.00792744	0.041	0.0169139	0.021	0.0058268	99.5181	1300	68 × 68	0.81	0.06	20	20.461	1896.29	61.1769	1.2647	0.0566169	39.6598	0.848222	8.03148	0.289159	14.6654	0.462524	0.498392	0.0382656	4.36486	0.335126
1528C-38-ol8	93.3421	0.00992027	57.4827	0.187777	0.2766	0.0184031	10.5724	0.0782358	4.4244	0.0495533	0.0764	0.015005	14.8508	0.0861346	8.3774	0.116167	0.23	0.017618	1.0992	0.0744525	0.0299	0.00587236	0.0969	0.00541348	0.0388	0.0171315	0.0242	0.00599192	97.5798	1300	35 × 32	1.26617	0.0706887
1528C-41-ol2-I1	93.0791	0.00990029	56.8545	0.185725	0.2674	0.0185219	10.0182	0.0768062	4.7775	0.0512785	0.0796	0.0152036	16.8368	0.0920412	8.065	0.114523	0.3059	0.0186599	1.0874	0.0746681	0.0382	0.00609417	0.192	0.0064896	0.018	0.0170052	0.034	0.00611773	98.5746	1330	35 × 35	1.17254	0.0850323
1528C-41-ol2-I2	93.0791	0.00990029	56.242	0.183724	0.2811	0.0181216	10.0136	0.0767709	4.9564	0.0522074	0.0907	0.0153041	16.9672	0.092754	7.9628	0.113603	0.311	0.01866	1.0347	0.0738086	0.0455	0.0061425	0.199	0.00650067	0.0443	0.0171825	0.0259	0.00604679	98.1742	1330	38 × 41	1.08289	0.0803736	20	15.298	1700.42	67.1635	1.00314	0.0974006	32.485	1.28589	7.24623	0.455045	13.9316	1.05682	0.412112	0.0712717	4.08215	0.767265
1528C-41-ol3	93.1273	0.00992124	56.1174	0.183317	0.2975	0.0185045	9.8579	0.0762344	4.9151	0.0521001	0.0904	0.0152655	16.8676	0.0922095	7.8398	0.112893	0.3388	0.0188599	1.0265	0.0729499	0.0364	0.00597203	0.1143	0.00560832	0.0359	0.0171434	0.0255	0.0059058	97.5631	1330	36 × 36	1.25273	0.0442079
1528C-44-ol1	93.2129	0.00324603	55.5988	0.0943543	0.2794	0.00980586	9.60373	0.0407452	5.1115	0.0272283	0.08985	0.00822407	18.6112	0.0605363	7.6918	0.0242939	0.287774	0.0150066	1.0505	0.0288986	0.05065	0.00216787	0.260099	0.00340869	0.0221703	0.00424148	0.02405	0.0017743	98.6738	1350	52 × 52	0.63	0.03
1528C-44-ol10	92.9259	0.00318816	55.1454	0.0935848	0.27285	0.00980978	9.41751	0.0403991	5.3798	0.0278967	0.0991	0.00834851	18.0808	0.0596637	7.90055	0.0245807	0.292203	0.0149874	1.033	0.0284386	0.044	0.00214197	0.331539	0.00378219	0.0179203	0.0040947	0.0348	0.00187295	98.0042	1350	60 × 60	0.99	0.07
1528C-44-ol13	92.9977	0.0031785	56.0734	0.0951597	0.2825	0.00986445	9.72915	0.0410486	4.93415	0.0267488	0.09205	0.00835393	18.1968	0.0600463	7.924	0.0246537	0.271252	0.0149633	1.0665	0.0289846	0.0381	0.00211608	0.152564	0.00278693	0.0223584	0.004267	0.0317	0.00184294	98.8023	1350	76 × 76	0.8	0.02
1528C-44-ol14	93.0112	0.00320677	55.966	0.0949775	0.28765	0.00985485	9.71795	0.0407717	5.1966	0.0274366	0.09	0.00829952	17.6671	0.0591314	8.11775	0.0248738	0.298592	0.0151264	0.9738	0.0280286	0.0299	0.00205709	0.122379	0.00257614	0.0241801	0.00427963	0.02945	0.00182696	98.5216	1350	43 × 43	1.1	0.04
1528C-44-ol15	93.0864	0.00317323	55.5506	0.0942724	0.2615	0.0096241	9.40024	0.040325	5.58095	0.0282823	0.103	0.00846829	18.8187	0.0612115	7.7008	0.0241415	0.295867	0.0149381	0.92445	0.0274766	0.0353	0.00211582	0.190395	0.00301582	0.0194936	0.0042521	0.0352	0.00186985	98.8915	1350	46 × 46	1.52	0.08
1528C-44-ol17	92.9514	0.00317223	55.1502	0.0935931	0.2716	0.0097668	9.46336	0.0403733	5.20315	0.0274712	0.09415	0.00836392	18.409	0.0603143	7.83835	0.0243872	0.265367	0.0150848	0.9932	0.0279801	0.05245	0.00219685	0.308618	0.00362258	0.0236751	0.0041866	0.02925	0.00183147	98.1479	1350	61 × 61	0.97	0.08	20	14.57	1596.28	58.7864	1.0491	0.0779417	34.0873	1.18354	6.90415	0.483847	12.8855	0.686286	0.40659	0.0490542	4.74903	1.05979
1528C-44-ol18	93.0469	0.00317899	55.6669	0.0944699	0.2877	0.00981252	9.65928	0.0407538	5.08425	0.0272032	0.0964	0.00835749	18.2151	0.0601068	8.014	0.0245559	0.239503	0.0147169	1.01695	0.0284538	0.04755	0.00215897	0.27797	0.00349867	0.0261222	0.00422982	0.02935	0.00181493	98.6793	1350	65 × 65	1.05	0.01
1528C-44-ol19-i2	93.0595	0.00318597	54.9868	0.0933157	0.2767	0.00977292	9.31748	0.03997	5.63305	0.0284133	0.10635	0.00840276	18.619	0.060562	7.6486	0.0239778	0.315365	0.01524	0.94685	0.0274964	0.04095	0.00211537	0.375615	0.00394858	0.0237129	0.0043344	0.02815	0.00179455	98.3573	1350	47 × 47	0.94	0.05
1528C-44-ol20	92.7648	0.00324213	54.7726	0.0929522	0.2677	0.00976848	9.31239	0.0399481	5.23875	0.0274122	0.0985	0.0084885	18.1466	0.0598809	7.67095	0.024228	0.329257	0.015343	0.944	0.0273901	0.03315	0.00208466	0.153769	0.00278714	0.0227226	0.0042087	0.0315	0.00183699	96.968	1350	43 × 43	1.17	0.06
1528C-44-ol21	93.0578	0.00326319	55.6782	0.094489	0.27915	0.00977736	9.5539	0.0405338	5.04475	0.0269919	0.08895	0.00829045	18.3663	0.0601745	7.721	0.0242048	0.270805	0.0148216	1.00415	0.0280703	0.0298	0.00203697	0.118924	0.00252838	0.0244109	0.00424468	0.0248	0.00178153	98.1964	1350	46 × 46	1.42	0.08
1528C-44-ol22	92.9947	0.00316962	55.7413	0.094596	0.2748	0.00980345	9.75903	0.040944	4.96855	0.0268184	0.09345	0.00834583	18.291	0.0603573	7.80085	0.0242705	0.315591	0.0150944	1.0282	0.0284276	0.03425	0.00208102	0.128659	0.00260208	0.025782	0.00432744	0.03425	0.00185626	98.475	1350	44 × 44	0.99	0.05
1528C-44-ol23	92.9516	0.00317515	55.8716	0.0948173	0.284967	0.00979976	9.70936	0.0407356	4.93703	0.0267644	0.0922	0.00818012	18.3496	0.0601197	7.84527	0.0244087	0.250818	0.0143736	1.03953	0.0287658	0.0435667	0.00208476	0.19952	0.00304268	0.0227321	0.0042661	0.0283667	0.00175554	98.6135	1350	85 × 85	0.85	0.11
1528C-44-ol24-i1	92.9566	0.00318631	55.4872	0.094165	0.270425	0.00988614	9.46816	0.04017	5.23077	0.0274941	0.099275	0.00822199	17.9351	0.0591829	7.78878	0.024233	0.189521	0.0152452	1.05455	0.0288847	0.041225	0.00211744	0.16799	0.00285089	0.0247613	0.00442529	0.033	0.00185198	97.8053	1350	118 × 118	0.8	0.03	38	20.061	1565.26	43.6394	0.866801	0.0520781	29.8164	0.835389	6.9076	0.330838	12.8161	0.520014	0.375015	0.0335388	4.34032	0.456474
1528C-44-ol24-i2	92.9566	0.00318631	55.4025	0.0940211	0.27795	0.00975513	9.52895	0.0406531	5.02955	0.0270289	0.09125	0.00824818	18.4486	0.0604441	7.67375	0.0242369	0.297877	0.0151421	1.06405	0.0289678	0.04305	0.00213008	0.170988	0.00287763	0.0282023	0.00442282	0.02855	0.00181098	98.0952	1350	35 × 35	0.94	0.06
1528C-44-ol25	93.1542	0.00321667	55.8811	0.0948334	0.2714	0.00973154	9.73714	0.0408522	4.75405	0.0262206	0.08655	0.00829462	18.1322	0.0598333	7.86015	0.024455	0.254371	0.0146744	1.04565	0.0285917	0.0293	0.00205643	0.0790582	0.00224607	0.0265649	0.00420418	0.0308	0.0018356	98.1403	1350	67 × 67	0.96	0.05
1528C-44-ol26	93.0599	0.00316886	54.9759	0.0932972	0.2816	0.00984776	9.29955	0.0398931	5.438	0.0280706	0.1023	0.00847825	17.6211	0.0590006	7.9687	0.0246057	0.244423	0.0149444	0.9141	0.0271551	0.0371	0.00209607	0.183103	0.00293944	0.0262468	0.00410596	0.0308	0.00182319	97.1733	1350	60 × 60	1.29	0.03	20	17.479	1682.54	65.2065	0.782072	0.0752771	32.0843	1.15393	7.48634	0.447456	13.2671	0.668263	0.418088	0.0614925	3.18637	0.601109
1528C-44-ol27	93.1443	0.00325476	54.6372	0.0927225	0.27875	0.00992872	9.68368	0.0406279	5.0722	0.0271388	0.0892	0.00839617	17.1122	0.0580808	8.30905	0.0250683	0.312305	0.0152883	0.9474	0.0275782	0.04675	0.00215674	0.32144	0.00371244	0.0239992	0.00421288	0.02655	0.00178913	96.8435	1350	53 × 53	1.08	0.06
1528C-44-ol28	92.9289	0.00317829	54.5105	0.093801	0.27485	0.00987331	9.53714	0.0404627	5.1072	0.0272054	0.0958	0.00827793	18.0144	0.0594445	7.79085	0.0242394	0.27384	0.0152291	1.03275	0.0285781	0.0527	0.00218746	0.294542	0.00354758	0.0214737	0.00425841	0.0309	0.00183631	97.0852	1350	52 × 52	0.9	0.12
1528C-44-ol29	93.1309	0.0032256	55.5958	0.0943492	0.29255	0.00996015	9.68841	0.0406477	4.9066	0.0267153	0.09935	0.00836333	18.4166	0.0603391	7.8174	0.024322	0.284634	0.0152752	1.04115	0.0284958	0.05315	0.00218259	0.292904	0.00354858	0.0226338	0.00423394	0.0288	0.00183305	98.5659	1350	54 × 54	0.93	0.05
1528C-44-ol3	92.6871	0.00334353	53.6953	0.132448	0.2801	0.0138183	8.88045	0.0556508	5.7166	0.0403973	0.1112	0.012017	17.9362	0.0848981	7.5793	0.0338542	0.349051	0.0217808	0.8918	0.0378718	0.0358	0.00298095	0.187627	0.00422787	0.0187349	0.00595895	0.0273	0.00258076	95.6797	1350	46 × 46	0.63	0.04
1528C-44-ol30	92.9527	0.00315074	55.7373	0.0945892	0.27775	0.00977449	9.64018	0.0408998	5.0493	0.027135	0.09765	0.00831223	18.2569	0.0602447	7.9189	0.0246378	0.237967	0.0147019	1.0461	0.0287257	0.04595	0.00215332	0.193591	0.00302071	0.0235868	0.00451239	0.03155	0.00183613	98.5589	1350	78 × 78	0.85	0.03	20	14.571	1629.78	70.6382	0.849479	0.069665	32.1342	1.14156	7.51627	0.516633	12.6474	0.753743	0.434051	0.0527316	4.25156	0.754793
1528C-44-ol31	92.9373	0.00332272	54.7805	0.0929657	0.2803	0.00977186	9.29236	0.0400818	4.9493	0.0268309	0.08775	0.00832942	17.9369	0.0596129	7.66085	0.0241961	0.333811	0.0153085	1.01255	0.0281626	0.0513	0.00218947	0.250212	0.00336163	0.031883	0.00431686	0.02625	0.0017875	96.6601	1350	53 × 53	0.93	0.05
1528C-44-ol32	92.6949	0.00311837	54.1814	0.0932346	0.28455	0.00988274	9.2178	0.039765	5.6996	0.0287489	0.11405	0.00840841	17.1729	0.0586929	8.0118	0.0247388	0.317299	0.0155281	0.91075	0.0271395	0.04065	0.00212998	0.254763	0.00335734	0.022203	0.00429521	0.03145	0.00182749	96.2936	1350	39 × 39	1.13	0.06
1528C-44-ol33	93.1237	0.00321825	54.9522	0.093257	0.28605	0.00989156	9.55066	0.04052	4.9544	0.0268586	0.0948	0.00835622	17.8861	0.0590211	7.96855	0.0244167	0.293739	0.0154256	0.983	0.0278737	0.0455	0.00216755	0.240941	0.00325984	0.0221876	0.00424276	0.0316	0.0018412	97.3638	1350	66 × 66	1.02	0.01
1528C-44-ol35	92.7883	0.00310869	55.928	0.094913	0.29175	0.0099303	9.79379	0.0408597	5.7621	0.0287938	0.10735	0.00843574	16.3908	0.0571826	8.4629	0.0251335	0.312506	0.0151713	0.99235	0.0282158	0.04155	0.00212526	0.314559	0.0036924	0.0258419	0.00430334	0.03175	0.00186308	98.4147	1350	59 × 59	1.21	0.04
1528C-44-ol36	93.0523	0.00325775	55.8416	0.0947663	0.2693	0.00971856	9.51813	0.040382	4.9276	0.0267133	0.0891333	0.00804966	18.1521	0.0598989	7.82027	0.024331	0.25379	0.0143087	1.04117	0.0282462	0.0303333	0.00212769	0.101466	0.00240606	0.0213978	0.00458583	0.0283	0.0018087	98.0501	1350	88 × 88	0.88	0.01	20	12.025	1613.14	58.0935	0.560106	0.11043	28.5384	1.1837	6.99287	0.477316	12.4431	0.678528	0.357286	0.0633436	3.97885	0.766607
1528C-44-ol37-i1	93.016	0.00313306	56.1686	0.0953213	0.2873	0.00992409	9.73524	0.0408442	5.02617	0.0270107	0.0965333	0.00832429	18.3411	0.0605224	7.86913	0.024483	0.26153	0.0150288	1.0969	0.0295259	0.0415	0.00209862	0.199497	0.00303762	0.0250519	0.00433682	0.0271333	0.00183346	99.2092	1350	77 × 77	1.39	0.01	38	21.798	1646.83	60.6698	0.840682	0.0741469	31.6756	1.2135	7.4159	0.509752	13.1463	0.686754	0.401358	0.0454517	3.93745	0.583569
1528C-44-ol37-i2	93.016	0.00313306	56.5267	0.0959291	0.27525	0.00973919	9.86863	0.0411719	4.9327	0.0267409	0.0967	0.00830074	18.3249	0.0604692	7.88575	0.0245347	0.223898	0.0145626	1.09265	0.0291279	0.04125	0.00211178	0.194183	0.00300714	0.0279991	0.00432407	0.0298	0.0018471	99.5506	1350	69 × 69	1.34	0.01
1528C-44-ol39	93.2026	0.00322532	55.9706	0.0949852	0.2741	0.00967829	9.79165	0.0410809	5.0355	0.0270608	0.0911	0.00835192	18.5374	0.0602965	7.75155	0.0241172	0.260641	0.0147081	1.03555	0.0287044	0.05335	0.0021893	0.301678	0.00362644	0.021499	0.00432898	0.0287	0.00181026	99.1322	1350	53 × 53	1.01	0.05
1528C-44-ol4	92.976	0.00331125	55.6999	0.0945259	0.30355	0.0100032	10.0811	0.0413477	5.34145	0.0278263	0.1056	0.00840125	16.0416	0.0567206	8.5063	0.0252624	0.276443	0.0151842	1.04015	0.0287846	0.05185	0.00223986	0.331972	0.00377938	0.0267569	0.00428805	0.03015	0.00182434	97.7819	1350	60 × 60	0.96	0.08
1528C-44-ol40	93.1994	0.00699135	55.6828	0.0792996	0.278833	0.00806396	9.95297	0.0344781	4.8346	0.021896	0.0840333	0.00668165	18.1863	0.0503993	7.7313	0.019839	0.325994	0.0126816	1.01347	0.0238083	0.0277	0.00165693	0.113233	0.00202418	0.0219667	0.00369936	0.0354667	0.00161092	98.3207	1350	32 × 32	1.25168	0.03
1528C-44-ol41	92.9282	0.00560371	55.5526	0.0645965	0.2802	0.00663178	9.6049	0.0277705	5.0277	0.0181706	0.08735	0.00551789	18.4315	0.0414172	7.64285	0.0160928	0.291658	0.0101985	1.02515	0.0195417	0.0283	0.0013523	0.10315	0.00159524	0.02435	0.00289315	0.02985	0.00129202	98.1812	1350	57 × 40	1.32287	0.05	20	13.744	1675.42	71.5443	0.578819	0.0697199	29.8358	1.39162	7.10336	0.470288	13.0819	0.822861	0.366336	0.0674392	3.76102	0.756104
1528C-44-ol42	92.9592	0.00657728	55.3062	0.0787633	0.293333	0.00816504	9.47122	0.0337818	6.13273	0.0245491	0.1041	0.00688994	16.9604	0.0489635	8.2217	0.020253	0.385138	0.0129513	0.882233	0.0227417	0.0366667	0.00170229	0.2231	0.00259338	0.0252333	0.00373964	0.0267667	0.00155384	98.1237	1350	25 × 25	1.64905	0.04
1528C-44-ol5	93.0308	0.00327956	55.7501	0.094611	0.2606	0.00975774	9.63035	0.0408581	4.90115	0.0266857	0.08455	0.00824367	18.0991	0.059724	7.64765	0.0239748	0.278016	0.0149088	1.00585	0.0282166	0.0301	0.00206595	0.0681108	0.00213546	0.026292	0.00438937	0.03065	0.00180986	97.8191	1350	44 × 44	0.98	0.03
1528C-44-ol6	92.9249	0.00323926	55.3128	0.0938689	0.28255	0.00985775	9.5244	0.0404086	5.1512	0.0273186	0.09885	0.00826743	18.078	0.0600821	7.81455	0.0243132	0.272379	0.0148643	0.96865	0.0277178	0.04245	0.00211418	0.201583	0.00309316	0.0242547	0.00433636	0.0247	0.00177582	97.7596	1350	41 × 41	1.12	0.06	20	13.288	1761.11	90.3676	0.827068	0.117196	32.428	1.4387	6.93349	0.469961	12.6075	0.981914	0.392681	0.0613009	3.95066	0.884478
1528C-44-ol8	92.9471	0.00330053	55.9905	0.134377	0.3118	0.0141349	10.2086	0.0585292	4.8975	0.037874	0.0932	0.0117432	15.1322	0.0776785	8.4606	0.0355345	0.323872	0.0218722	1.0814	0.0411653	0.0306	0.00291516	0.104515	0.00342112	0.0229972	0.00604061	0.0356	0.00267237	96.7016	1350	43 × 43	1.37	0.07
1528C-44-ol9	92.9527	0.00327482	54.9925	0.0933255	0.3017	0.0100057	9.77504	0.0410138	5.2903	0.027682	0.09745	0.00849985	16.7976	0.0578101	8.2633	0.0251258	0.287238	0.0152745	0.97465	0.0277308	0.04635	0.0021759	0.285914	0.0035313	0.0252225	0.0043546	0.02685	0.00181971	97.1593	1350	43 × 43	1.05	0.05	20	12.502	1875.96	83.2705	1.15545	0.193473	38.32	1.67842	7.7351	0.519765	15.072	1.04595	0.436113	0.069801	4.38861	1.11564
1528C-45-ol1	93.0674	0.0252427	57.1928	0.0970595	0.3197	0.0102036	10.737	0.0437826	4.41	0.0257783	0.0845	0.00815016	14.9453	0.0563623	8.7169	0.0258879	0.172	0.0148502	1.1508	0.0308417	0.03645	0.00206672	0.151046	0.00273778	0.03165	0.00457367	0.0246	0.0018914	97.9672	1300	52 × 39	1.64067	0.02	38	9.993	1943.32	78.5363	0.71668	0.0818306	34.2532	1.11247	8.58793	0.600679	15.3638	0.720585	0.402436	0.0532125	3.93993	0.734641
1528C-45-ol10	93.1562	0.0146704	57.6146	0.0977752	0.32985	0.0102936	11.0108	0.0441197	4.55045	0.0261703	0.0848	0.00827404	14.4111	0.0553677	8.94565	0.0261455	0.2399	0.0148891	1.1219	0.0307818	0.0425	0.00209082	0.257163	0.0033762	0.02945	0.00456592	0.0303	0.00195871	98.6602	1300	30 × 30	1.63	0.02
1528C-45-ol11	93.2277	0.00454454	57.8882	0.0802122	0.306233	0.00816879	10.5295	0.0352595	4.7283	0.0216571	0.0914333	0.00666111	15.9693	0.0473286	8.1428	0.0202681	0.188397	0.0116686	1.16033	0.0252195	0.0357	0.00165357	0.156467	0.00225642	0.0239667	0.00359138	0.0265667	0.00152709	99.2236	1300	40 × 36	1.63327	0.05	38	8.352	1717.88	69.3122	0.688485	0.0999054	33.2209	1.26338	7.74523	0.540466	14.5023	0.826506	0.427763	0.060692	4.08226	1.06252
1528C-45-ol12	92.9058	0.0212432	57.5322	0.0797189	0.314567	0.00827795	10.7061	0.0355766	4.66623	0.0214927	0.0889	0.00672663	15.4817	0.0464796	8.57463	0.0207924	0.173414	0.0123393	1.12877	0.0250251	0.0383667	0.00170331	0.208433	0.00252713	0.0219	0.00362095	0.0283	0.00156602	98.9357	1300	53 × 40	1.67917	0.03
1528C-45-ol13	93.0231	0.00368427	57.2081	0.0792698	0.322267	0.00836137	10.8265	0.0358371	4.54413	0.0212801	0.0875667	0.00677274	15.0215	0.0458695	8.81037	0.0210249	0.112996	0.0116889	1.18593	0.0254718	0.0540667	0.00178255	0.3531	0.0031395	0.0279	0.00374102	0.0351667	0.00161427	98.5962	1300	54 × 42	1.36836	0.03	20	15.341	1902.07	90.3147	1.33086	0.123056	43.6242	2.4083	7.98365	0.548165	15.0843	1.1701	0.484631	0.0683858	6.48082	1.16164
1528C-45-ol14	93.014	0.0115513	57.376	0.0795025	0.311	0.00833942	10.6772	0.0356177	4.47143	0.0212839	0.0792667	0.00678477	14.6838	0.0455942	8.69073	0.0210739	0.1619	0.0120963	1.1052	0.0248179	0.0353	0.00168674	0.101346	0.00197445	0.0249	0.00364009	0.0289	0.00157223	97.7297	1300	44 × 35	1.59707	0.01
1528C-45-ol15	93.004	0.00909664	57.6771	0.0799197	0.326567	0.00839161	10.8385	0.035877	4.26577	0.0206333	0.0816667	0.00667081	14.8607	0.045759	8.80423	0.0210103	0.1596	0.0121593	1.14933	0.0252304	0.0369667	0.00169916	0.166387	0.00233543	0.0285333	0.00370836	0.0233	0.00152329	98.389	1300	49 × 41	1.41807	0.01	38	13.125	1874.82	71.0928	0.868532	0.0882204	34.489	1.04213	8.1979	0.415562	15.3724	0.697154	0.457129	0.0551531	3.9562	0.60691
1528C-45-ol16	92.9899	0.00576817	57.1129	0.079138	0.310667	0.00827507	10.6	0.03536	4.4721	0.0211149	0.0854333	0.00667025	14.8627	0.0457654	8.74137	0.020973	0.15283	0.0119961	1.13313	0.0249488	0.0514	0.0017694	0.2036	0.00249477	0.0258	0.00364489	0.0295	0.00157578	97.7397	1300	50 × 45	1.48478	0.01	38	16.854	1875.59	60.4105	1.10166	0.0769646	37.7536	1.05048	8.54576	0.543397	15.2421	0.668612	0.492056	0.0555541	5.18587	0.612489
1528C-45-ol17	92.8944	0.00264974	57.326	0.0794333	0.312067	0.00834081	10.7865	0.0357049	4.45897	0.02111	0.0848667	0.00669988	14.9893	0.0455783	8.62147	0.0209059	0.154727	0.0119833	1.2086	0.0256483	0.0526667	0.00177657	0.292467	0.00288931	0.0273	0.00360317	0.0314	0.00161072	98.3309	1300	54 × 54	1.29846	0.06	20	11.761	1887.17	60.4096	1.10093	0.0708343	39.4638	1.07429	8.02871	0.361926	14.5007	0.55419	0.45801	0.0364259	4.9606	0.623232
1528C-45-ol18	92.7714	0.0236845	56.8391	0.0794945	0.290033	0.00827255	10.4266	0.0354869	4.49403	0.0211608	0.0827667	0.00663061	17.3084	0.0504732	8.1018	0.0205253	0.217433	0.0123311	1.12113	0.0248782	0.0435	0.00173765	0.23822	0.0027103	0.0257667	0.00381724	0.0336	0.00162407	99.1941	1300	34 × 22	1.43835	0.08
1528C-45-ol19	92.8075	0.0197735	57.4684	0.0796306	0.3266	0.00839512	10.8187	0.0358115	4.52497	0.0213645	0.0886	0.00674843	14.8612	0.0457605	8.7777	0.0211728	0.158833	0.0119199	1.17353	0.0253855	0.0564667	0.00179783	0.311948	0.00299774	0.0292	0.00369561	0.0242667	0.00154759	98.5993	1300	67 × 56	1.17481	0.02	20	26.251	1903.74	47.757	1.33158	0.0839615	41.6394	0.943333	7.93536	0.364511	15.4653	0.605793	0.540545	0.0451004	4.88744	0.60656
1528C-45-ol2	92.8732	0.0113467	56.8676	0.0965076	0.3089	0.0101787	10.525	0.0431655	4.73005	0.0266459	0.08965	0.00831165	14.9368	0.0563304	8.65935	0.025717	0.17705	0.0148461	1.0624	0.0297755	0.04225	0.00211331	0.248402	0.00333731	0.026	0.00444462	0.02345	0.00190216	97.6697	1300	37 × 37	0.991139	0.05
1528C-45-ol20	93.1288	0.00158059	57.2137	0.0792776	0.308567	0.00829457	10.6672	0.0357204	4.46653	0.0211458	0.0785333	0.00670033	14.8226	0.0456419	8.5838	0.0208146	0.1908	0.0120951	1.0605	0.0244239	0.0303	0.00166588	0.128398	0.00213169	0.0225667	0.00360814	0.0231	0.00154214	97.5836	1300	31 × 30	1.26451	0.05
1528C-45-ol21	93.1218	0.0132744	58.2876	0.0807657	0.322367	0.00838029	10.9819	0.0360705	4.11663	0.0203873	0.0706333	0.00663145	15.0502	0.0459572	8.6095	0.0208769	0.157667	0.0118629	1.23667	0.0260532	0.029	0.00164076	0.0773119	0.00180355	0.0238667	0.00361107	0.0230667	0.00153715	98.9695	1300	60 × 60	1.27922	0.02	20	10.272	1898.71	102.894	0.465926	0.066115	31.3811	1.50903	7.90806	0.59501	14.2773	0.906073	0.404481	0.064893	3.4196	0.897622
1528C-45-ol22	93.0524	0.0085848	57.895	0.0802217	0.315633	0.00834622	11.1348	0.0361441	4.42353	0.0209991	0.0825667	0.00661598	14.5481	0.0451706	8.95753	0.0213761	0.196433	0.0120096	1.12483	0.0250679	0.0316333	0.00165373	0.121934	0.00210259	0.0249667	0.00368155	0.0326333	0.00161939	98.8579	1300	35 × 35	1.40548	0.04
1528C-45-ol23	93.1186	0.00476435	58.0216	0.080397	0.321533	0.0084034	11.0172	0.0360445	4.23973	0.0206705	0.0814333	0.00669407	15.0238	0.0460693	8.7036	0.0211051	0.1418	0.0118831	1.186	0.0256268	0.0514333	0.0017705	0.268982	0.00281261	0.0321667	0.00370284	0.0266667	0.00156454	99.108	1300	53 × 43	1.28774	0.03	38	10.739	1898.43	89.2008	1.18371	0.0995888	36.2061	1.244	8.4281	0.620835	14.3134	0.834769	0.423479	0.0586549	4.1451	0.6521
1528C-45-ol24	92.9048	0.0105886	57.7417	0.0800093	0.320367	0.00836091	10.8773	0.035727	4.373	0.0209275	0.0819	0.00668255	14.6234	0.0452168	8.80127	0.0210032	0.190444	0.0120326	1.14987	0.0252132	0.0275	0.00164587	0.0836333	0.00184373	0.0244	0.00359889	0.0290667	0.00158566	98.3353	1300	42 × 40	1.32582	0.01	38	9.844	1861.57	79.3487	0.547605	0.0692579	32.926	1.24299	8.37216	0.537928	15.2031	0.769922	0.456607	0.0611738	4.61947	0.971557
1528C-45-ol25-i1	93.0158	0.00896302	57.7323	0.0799962	0.3182	0.00833101	10.8875	0.0360393	4.40637	0.021031	0.0811	0.00676406	15.1001	0.0461097	8.63253	0.0209328	0.1662	0.0120619	1.17027	0.0254203	0.0315667	0.00167474	0.117255	0.0020641	0.0306333	0.00366922	0.0312	0.00159301	98.6933	1300	60 × 50	1.31905	0.01
1528C-45-ol25-i2	93.0158	0.00896302	57.8421	0.0801483	0.313233	0.00830923	10.7497	0.0357215	4.3425	0.0208929	0.0856333	0.00673524	14.9549	0.0460491	8.67843	0.0210441	0.144233	0.0118209	1.13863	0.0251716	0.0314333	0.00166597	0.117808	0.0020526	0.0358333	0.00382869	0.0348	0.00161599	98.4581	1300	60 × 50	1.2944	0.05	20	16.228	1827.8	54.8584	0.596852	0.0553442	32.8526	1.01997	7.81503	0.421333	14.2085	0.681996	0.398196	0.0430245	4.6812	0.778476
1528C-45-ol26	92.7915	0.016948	57.3757	0.0795021	0.322167	0.00838115	10.7295	0.0357919	4.48063	0.0211552	0.0846	0.0066988	14.7291	0.0455435	8.83123	0.0210747	0.197667	0.0122213	1.10393	0.0249186	0.0462667	0.00174811	0.280014	0.00285973	0.0287	0.00365395	0.0301	0.0015888	98.2307	1300	40 × 40	1.39798	0.04	38	13.451	1868.08	74.2482	0.968552	0.0901428	38.0532	1.47061	8.56738	0.51192	15.2034	0.861074	0.470459	0.0557385	3.94141	0.653879
1528C-45-ol27	92.9495	0.00903935	57.1792	0.0792298	0.313033	0.00834993	10.7245	0.0356379	4.54153	0.0213261	0.0877	0.00671468	14.8013	0.045767	8.81473	0.0210353	0.172967	0.0121271	1.12867	0.0250393	0.0447	0.00173822	0.268432	0.0028241	0.0301667	0.00363619	0.0301333	0.0016004	98.1096	1300	46 × 46	1.43188	0.03	38	12.681	1904.52	71.7877	1.00543	0.0849106	38.5917	1.26997	8.93095	0.562851	15.2167	0.766297	0.503145	0.0546541	4.69062	0.765487
1528C-45-ol28	93.048	0.0100295	57.8829	0.0802049	0.310867	0.00828232	10.6963	0.0354063	4.38503	0.0209287	0.0856333	0.00665161	15.1558	0.0460845	8.62517	0.0209149	0.137277	0.0117331	1.1388	0.0249997	0.0352	0.00166969	0.152	0.00224277	0.0294	0.00371185	0.0293333	0.00156366	98.6527	1300	61 × 61	1.38645	0.02	20	17.451	1831.74	55.4449	0.688915	0.0554731	32.9389	0.877961	7.6755	0.411859	13.8834	0.620163	0.428831	0.0551921	4.33816	0.631153
1528C-45-ol29-i1	92.9238	0.0109642	56.4175	0.0957437	0.3077	0.0102408	10.7864	0.0442403	4.4795	0.0252398	0.0838	0.00789689	13.9219	0.0531631	9.2529	0.027047	0.1545	0.0130854	1.1567	0.0318855	0.0346	0.00211099	0.1501	0.00279928	0.0244	0.00578145	0.0272	0.00208924	96.7972	1300	40 × 40	1.81477	0.04
1528C-45-ol3	92.9605	0.00186758	57.4023	0.0795389	0.324633	0.00843657	10.9509	0.0361092	4.36693	0.0209545	0.0825667	0.00666144	14.4959	0.0453805	8.99843	0.0213589	0.148633	0.0120165	1.1456	0.0252956	0.027	0.00164991	0.0839794	0.0018562	0.0282333	0.00380802	0.0355333	0.00163313	98.0781	1300	61 × 43	1.34577	0.02	20	16.674	1981.56	79.8913	0.563531	0.0702341	33.5019	1.35325	8.21481	0.4989	15.0793	0.74113	0.46868	0.0601801	4.33575	0.751895
1528C-45-ol30	93.0098	0.00188183	57.3984	0.0795336	0.316967	0.00833824	10.4964	0.0354185	4.58557	0.0214742	0.0890333	0.00669148	15.1316	0.0462059	8.57233	0.0208974	0.138233	0.0117662	1.11943	0.0249764	0.0349667	0.00169118	0.170982	0.00234727	0.0237333	0.00370898	0.0203667	0.00151577	98.0838	1300	55 × 55	1.59272	0.03	20	16.823	1831.4	65.7707	0.785753	0.0605591	33.5503	1.21065	7.53499	0.468471	13.8877	0.655178	0.409468	0.0561057	4.26731	0.734543
1528C-45-ol31	92.979	0.0111291	56.7334	0.0786121	0.3172	0.0083682	10.4964	0.0351485	4.8418	0.0219286	0.0924333	0.00667931	14.7324	0.0455538	8.7165	0.0209133	0.172444	0.0120925	1.07447	0.0244987	0.0387333	0.00170353	0.2191	0.00257498	0.0255667	0.00355423	0.0231667	0.00153197	97.5036	1300	40 × 33	1.73428	0.03
1528C-45-ol32	93.0962	0.0112574	56.7848	0.096367	0.32545	0.0102888	11.035	0.0442166	4.6931	0.0264378	0.0795	0.00815045	14.687	0.0557441	8.8505	0.0258708	0.176486	0.0150538	1.16255	0.0309638	0.0347	0.00203852	0.15995	0.00279453	0.0227	0.00483148	0.02385	0.0018851	98.0157	1300	48 × 32	1.6629	0.05
1528C-45-ol33	92.7814	0.00918729	57.1924	0.0792481	0.3151	0.00834733	10.4116	0.0352652	4.70247	0.0217203	0.0872333	0.00673136	15.1122	0.0461466	8.54687	0.0208353	0.186867	0.0120507	1.0785	0.0245754	0.0321667	0.00166033	0.146855	0.00223094	0.0245333	0.00364047	0.0268	0.00156514	97.8451	1300	42 × 42	1.8397	0.01	38	11.634	1859.92	79.0589	0.628145	0.0676768	33.8199	1.22498	8.05569	0.621056	15.1925	0.713241	0.434866	0.0620879	3.96199	0.630267
1528C-45-ol34	93.074	0.00647912	57.613	0.0798309	0.315767	0.00832052	10.8356	0.0358675	4.34327	0.0208966	0.0847333	0.0067691	14.9465	0.0460234	8.74363	0.0210906	0.141033	0.0117939	1.1365	0.0252265	0.0427	0.00172747	0.248316	0.00273034	0.0248333	0.00363564	0.0272333	0.0015659	98.4839	1300	53 × 53	1.4047	0.03	20	11.186	1844.02	80.811	0.908188	0.143241	36.364	1.54208	7.6496	0.574687	13.9208	0.881236	0.485886	0.0751538	4.52118	0.973714
1528C-45-ol35	92.911	0.0149193	57.6974	0.0799478	0.321867	0.00830887	10.7168	0.0356122	4.42097	0.0210437	0.0846333	0.00668716	14.8796	0.0458173	8.67753	0.0210419	0.1214	0.0116448	1.17663	0.0254827	0.0390333	0.00171246	0.187859	0.00244164	0.0307333	0.00367617	0.0246667	0.00154071	98.3722	1300	77 × 77	1.23341	0.01	20	31.413	1859.93	58.9825	0.911436	0.074183	34.6548	1.12722	7.88761	0.416768	14.3792	0.760189	0.476301	0.0405341	4.3036	0.559394
1528C-45-ol36	92.8669	0.0105843	57.0259	0.0790174	0.3093	0.00834748	10.6343	0.0356104	4.77697	0.0218805	0.0899	0.00677777	14.9529	0.0462355	8.71797	0.0210287	0.1838	0.011989	1.0726	0.0245521	0.0425667	0.00171012	0.225971	0.00261811	0.0260333	0.00371765	0.0241	0.00154419	98.076	1300	35 × 28	1.62761	0.05
1528C-45-ol37	93.0217	0.008538	57.0388	0.096798	0.32045	0.0101922	10.7018	0.0433861	4.7399	0.0265895	0.08725	0.00817896	14.1941	0.0548676	8.96195	0.0259828	0.185283	0.0149118	1.0829	0.0301196	0.027	0.00201646	0.10425	0.00241545	0.0236	0.00445356	0.0258	0.00189386	97.5159	1300	35 × 30	1.52563	0.09
1528C-45-ol38	92.9949	0.005953	57.9804	0.08034	0.3304	0.00838123	10.9686	0.0360266	4.2907	0.0208088	0.0760667	0.0067056	15.0794	0.0460464	8.63643	0.0209422	0.135367	0.0119857	1.1699	0.0254568	0.0295667	0.0016577	0.0929902	0.00192034	0.0255	0.00366684	0.0225	0.00153229	98.8157	1300	49 × 42	1.38808	0.06	38	14.169	1917.44	66.0783	0.561269	0.0516111	32.6956	1.16157	8.26288	0.491941	14.9101	0.645939	0.455853	0.0480712	4.4571	0.721317
1528C-45-ol39	93.0038	0.0100604	57.9588	0.0803101	0.3249	0.00838621	10.7881	0.0357101	4.255	0.0206357	0.0846	0.00676454	14.8503	0.0457272	8.71433	0.0210199	0.127067	0.0118834	1.17913	0.0253879	0.0324	0.00166873	0.153089	0.00227672	0.0288	0.0036588	0.0326667	0.00160008	98.4987	1300	70 × 70	1.25	0.03	20	21.329	1893.92	55.7329	0.649658	0.0644404	31.3864	0.924688	7.73478	0.403616	13.6725	0.543896	0.419397	0.0419295	4.19345	0.571996
1528C-45-ol4	92.7097	0.0120327	57.539	0.0797284	0.323667	0.00833558	10.7521	0.0355909	4.52987	0.0212713	0.081	0.00670486	15.1547	0.0460811	8.60573	0.0208678	0.174767	0.011906	1.1853	0.0254141	0.0422667	0.00171991	0.217747	0.00259535	0.0257667	0.00373006	0.033	0.00159407	98.6341	1300	50 × 50	1.3633	0.01	20	17.121	1860.22	45.7026	0.9071	0.0508631	35.8005	0.882691	7.9886	0.311766	14.1666	0.46791	0.473047	0.0364349	4.35948	0.473036
1528C-45-ol40	93.151	0.0090442	57.8793	0.0801999	0.337133	0.00848708	11.9848	0.0375194	4.6301	0.021505	0.0867	0.0067088	14.1191	0.0445623	9.4252	0.0217666	0.0912333	0.0114621	1.31947	0.0268164	0.0446667	0.00173135	0.184214	0.00243207	0.0331667	0.00380755	0.0213	0.00156973	100.126	1300	53 × 45	0.577776	0.02	38	12.678	1981	83.5086	0.883047	0.0870917	37.438	1.24393	8.537	0.570276	16.0974	0.781117	0.465361	0.072435	4.81207	0.984428
1528C-45-ol41	93.1309	0.000729706	57.6117	0.0798291	0.3198	0.00834174	10.8386	0.0358774	4.39683	0.0209855	0.0838667	0.00667993	15.1162	0.0459641	8.58157	0.0208092	0.138333	0.0118102	1.1324	0.025035	0.0284333	0.0016457	0.0876206	0.00188302	0.0276667	0.00370226	0.0195333	0.001501	98.3547	1300	40 × 35	1.56922	0.04	38	9.695	1805.18	64.3955	0.494124	0.06073	32.3814	1.11009	8.01625	0.484214	15.0262	0.7325	0.418199	0.0530478	3.41591	0.634373
1528C-45-ol42	92.8579	0.0161576	57.0593	0.0790636	0.3168	0.00839442	10.6071	0.0355192	4.3572	0.0209636	0.0811333	0.00684292	14.5335	0.0453109	8.77727	0.0211717	0.149133	0.011962	1.12827	0.0250155	0.0383	0.00170502	0.172465	0.00236989	0.0274667	0.00358415	0.0329	0.0016218	97.2605	1300	50 × 50	1.3207	0.06	38	13.573	1869.54	80.3521	0.755719	0.0618483	35.1692	1.0878	8.36336	0.451659	15.4857	0.824946	0.458966	0.0538853	4.49588	0.647243
1528C-45-ol44	93.061	0.0088301	57.3981	0.0795332	0.3224	0.00835244	10.8982	0.0360745	4.56373	0.0213719	0.0872667	0.00672506	15.0395	0.0461198	8.74697	0.0210986	0.148567	0.0119979	1.16547	0.025421	0.0537667	0.00178115	0.346075	0.0031349	0.0261667	0.00361202	0.0246667	0.00154525	98.8059	1300	44 × 44	1.42073	0.01
1528C-45-ol45	93.1257	0.00426178	57.1218	0.0791502	0.318	0.00836883	10.6053	0.0355133	4.47337	0.0211786	0.0830667	0.00668724	14.9441	0.0460183	8.49797	0.0208251	0.1819	0.0120331	1.0788	0.0245411	0.0398667	0.00172871	0.191925	0.00246241	0.0292	0.0036736	0.018	0.00149715	97.5668	1300	31 × 31	1.65008	0.01
1528C-45-ol46	92.8901	0.00433457	57.6856	0.0799315	0.314033	0.00834152	11.0508	0.0362967	4.30877	0.0208964	0.0777333	0.00675042	14.9366	0.0459929	8.71623	0.0211357	0.1495	0.0118122	1.2051	0.0258363	0.0293	0.00166151	0.0788233	0.00182863	0.0249	0.00358036	0.0318667	0.00159479	98.5935	1300	50 × 50	1.33727	0.04	38	11.524	1811.42	60.0486	0.510086	0.0677214	31.626	1.19552	8.17438	0.45528	15.4421	0.924854	0.401666	0.0473996	3.77244	0.786504
1528C-45-ol47-i1	92.8895	0.0102802	57.9516	0.0803	0.3303	0.00838718	10.9137	0.036126	4.42863	0.0211373	0.086	0.00670499	14.8347	0.0458703	8.85343	0.0212419	0.128567	0.0117199	1.18303	0.0255982	0.0357	0.00168804	0.161943	0.002325	0.0241667	0.00381091	0.0254667	0.00156793	98.9312	1300	78 × 62	1.26986	0.02	20	21.03	1949.47	58.3487	0.688493	0.0569057	34.4314	0.955216	7.56285	0.33642	13.8553	0.611629	0.413888	0.0389696	3.97912	0.480154
1528C-45-ol47-i2	92.8895	0.0102802	57.7148	0.0799719	0.3211	0.00837269	10.9615	0.0362842	4.55123	0.0214302	0.0856667	0.00676849	15.1152	0.0461557	8.72107	0.0210362	0.146467	0.011948	1.1867	0.0255334	0.0372667	0.00168953	0.163292	0.0023256	0.0284	0.00370181	0.0239667	0.00154448	99.0311	1300	57 × 44	1.33653	0.01	20	14.169	1835.14	48.4289	0.777178	0.0596469	34.1819	0.875099	7.80567	0.421822	14.5058	0.562835	0.442165	0.0404177	3.91196	0.357586
1528C-45-ol48	93.022	0.0108752	57.2809	0.0793708	0.3231	0.00839432	10.9533	0.036257	4.4806	0.0212124	0.0850333	0.00667587	15.0315	0.0462851	8.83633	0.0210869	0.1594	0.0119491	1.17743	0.0255616	0.042	0.0017235	0.239378	0.00269347	0.0243667	0.00372511	0.0244333	0.00154493	98.635	1300	48 × 40	1.36544	0.01	38	11.783	1920.35	90.1098	1.02609	0.0890081	37.6325	1.32077	8.26836	0.500807	15.6387	0.707897	0.470481	0.0525334	5.06768	0.847006
1528C-45-ol49	92.944	0.0194656	57.9434	0.0802887	0.323033	0.00837255	10.8317	0.0358545	4.3283	0.0208802	0.0827	0.00669913	15.0196	0.0462484	8.65117	0.020978	0.144267	0.0118651	1.19143	0.0256066	0.0381	0.00170216	0.188012	0.00245322	0.0241667	0.00377924	0.0343667	0.00162805	98.7788	1300	67 × 67	1.29596	0.01	20	31.413	1848.37	45.7171	0.825343	0.0483371	34.4602	0.831026	7.95691	0.304936	14.2747	0.515262	0.473368	0.0337533	4.31138	0.307422
1528C-45-ol5	92.9236	0.00851839	56.4865	0.07827	0.320667	0.00835303	10.5654	0.0353797	4.7731	0.02174	0.0874	0.00670957	15.2778	0.0462602	8.58943	0.0208283	0.15996	0.0120079	1.0983	0.0247302	0.0444	0.00175058	0.241567	0.00267784	0.0254	0.00359388	0.0203667	0.00151844	97.7227	1300	50 × 35	1.76847	0.07	20	10.142	1832.99	100.068	1.03756	0.151238	37.5007	1.72743	7.31392	0.722238	14.5411	1.12858	0.315901	0.0897782	5.99485	1.30881
1528C-45-ol50	92.9425	0.00512982	57.7721	0.0800514	0.3132	0.00837097	10.8253	0.0358332	4.45577	0.0211521	0.0791667	0.00674891	15.0155	0.0462356	8.81173	0.0211418	0.1647	0.0122082	1.14337	0.0252914	0.039	0.00171398	0.203773	0.00251778	0.0278	0.0036536	0.0235667	0.00155553	98.8641	1300	40 × 35	1.40449	0.01
1528C-45-ol51	92.7616	0.0112007	57.1531	0.0791937	0.3036	0.00824291	10.517	0.0352177	4.87553	0.0219561	0.0953	0.00670443	15.5281	0.0466188	8.38047	0.0206441	0.196127	0.0120497	1.0918	0.024668	0.0418333	0.00171346	0.222133	0.00258208	0.0228333	0.00348266	0.0284667	0.00156633	98.4499	1300	35 × 35	1.6968	0.03
1528C-45-ol52	92.9266	0.0217009	57.3777	0.0795049	0.3174	0.00833602	10.9313	0.0359042	4.4564	0.0210408	0.0895667	0.00664046	14.994	0.0457857	8.65883	0.0208878	0.128985	0.0118446	1.1771	0.0254178	0.0404	0.00171615	0.223767	0.00259249	0.0226667	0.00354594	0.0663	0.00285623	98.5002	1300	50 × 45	1.33926	0.01	38	12.23	1850.33	62.3462	0.907998	0.0876638	37.3158	1.30497	8.46476	0.62608	15.4467	0.833738	0.463707	0.0538592	4.40185	0.745329
1528C-45-ol6	93.2015	0.00821001	58.1097	0.0805191	0.330833	0.00833706	10.9857	0.036083	4.24367	0.0206897	0.0822667	0.00669892	14.7319	0.0457436	8.78177	0.0211826	0.1829	0.0123733	1.1884	0.02551	0.0330333	0.00167693	0.120883	0.00207695	0.0263667	0.00365513	0.0305333	0.0015856	98.8378	1300	44 × 44	1.29829	0.02	38	13.396	1904.97	63.4325	0.670301	0.0629979	34.5391	1.10518	8.41049	0.470819	16.0886	0.723641	0.438192	0.0554898	4.1421	0.840181
1528C-45-ol7	92.9574	0.00542522	57.0919	0.0791088	0.3199	0.00836262	10.7061	0.0358509	4.461	0.0211196	0.0832667	0.00669648	15.124	0.0461825	8.47163	0.0208687	0.1455	0.0118639	1.1554	0.0252018	0.0350667	0.00168527	0.160966	0.00229452	0.0244333	0.00375849	0.0211	0.00153004	97.7909	1300	46 × 38	1.47943	0.01	38	13.125	1868.81	74.9025	0.663487	0.0563952	33.9512	1.34954	8.02714	0.498119	15.3492	0.668581	0.464225	0.0498222	4.12558	0.617094
1528C-45-ol8	93.0128	0.0143399	57.045	0.0968086	0.3471	0.0104151	12.1034	0.0462154	4.76235	0.0267154	0.09025	0.00826254	13.8572	0.0542183	9.50055	0.0268716	0.110046	0.0142919	1.3548	0.0332763	0.05925	0.0022161	0.31335	0.00364117	0.0318	0.0045153	0.01775	0.00181471	99.5533	1300	55 × 47	0.299999	0.01	38	11.932	2044.53	64.0768	1.25809	0.0896168	44.051	1.30569	9.03136	0.470642	16.6806	0.708247	0.547834	0.0611517	5.1154	0.716374
1528C-45-ol9	93.1225	0.00514875	56.9973	0.0967277	0.3234	0.0101991	10.7164	0.0434452	4.61195	0.0261981	0.0875	0.00809705	14.596	0.05539	8.8199	0.025778	0.185641	0.0148367	1.08835	0.0300906	0.02725	0.00201827	0.12825	0.00258765	0.0203	0.00465055	0.0241	0.00189986	97.5951	1300	32 × 32	1.70554	0.01
[truncated: 70 more columns]

## Sheet: Table 3c
Table 3c . Repeated analyses of single melt inclusions for Rb-Sr isotopes
	Duration (s)	87Rb/86Sr	2SE (abs)	87Sr/86Sr	2SE (abs)
1522-34-ol60-1	18.073	0.061902	0.00341053	0.703087	0.000871326
1522-34-ol60-2	26.437	0.0615382	0.00344735	0.704029	0.000752605
1522-47-ol10-1	35.007	0.0649255	0.00370182	0.703246	0.00086261
1522-47-ol10-2	29.693	0.0613939	0.00342606	0.703545	0.000734403
1522-47-ol10-3	28.287	0.0629314	0.00347449	0.703554	0.000821382
1523B-47-ol1-1	35.009	0.0596612	0.00336125	0.703408	0.000648471
1523B-47-ol1-2	8.691	0.0586041	0.00335165	0.702724	0.000921042
1523B-47-ol21-1	35.021	0.0819908	0.00457662	0.703406	0.000612104
1523B-47-ol21-2	23.806	0.0838149	0.00469673	0.703729	0.00068089
1523B-47-ol9-1	9.602	0.0640864	0.00366241	0.702916	0.000897355
1523B-47-ol9-2	9.569	0.062471	0.00356333	0.703078	0.00103415
1528C-44-ol24-1	22.051	0.0777783	0.00435236	0.704245	0.000677922
1528C-44-ol24-2	30.78	0.0800876	0.00444311	0.704159	0.000739589
1528C-44-ol24-3	15.542	0.077905	0.00431104	0.704153	0.000801757
2217-48-65	27.1176	0.0577552	0.00327529	0.70236	0.00102927
2217-48-65	33.6614	0.0553656	0.00308767	0.702886	0.00114724
2217-48-65	30.0472	0.0595185	0.00351239	0.702556	0.000924901
2217-48-65	27	0.0569	0.00322561	0.70185	0.00134

## Sheet: Table 3d
Table 3d . Repeated analyses of single melt inclusion 2217-48-ol65 for Rb-Sr isotopes and trace elements to show the robustness of the analytical protocol.
Sample-Incluison id	Duration (s)	87Rb/86Sr	2SE (abs)	87Sr/86Sr	2SE (abs)	Sr initial	2SE (abs)	Model age	2SE	Spot Size (µm)	Time (s)	Ti	2SE (abs)	Rb	2SE (abs)	Sr	2SE (abs)	Y	2SE (abs)	Zr	2SE (abs)	Nb	2SE (abs)	Ba	2SE (abs)	La	2SE (abs)	Ce	2SE (abs)	Pr	2SE (abs)	Nd	2SE (abs)	Sm	2SE (abs)	Eu	2SE (abs)	Gd	2SE (abs)	Dy	2SE (abs)	Er	2SE (abs)	Yb	2SE (abs)	Pb	2SE (abs)	Th	2SE (abs)
2217-48-ol65	27	0.05776	0.00328	0.70236	0.00103	0.69966	0.00103	4031	866	38	29	1623.95	39.95	0.6	0.03	31.12	0.64	7.5	0.26	13.16	0.38	0.44	0.03	4.14	0.42	0.6	0.03	1.68	0.08	0.27	0.02	1.55	0.13	0.55	0.07	0.25	0.02	0.98	0.09	1.21	0.08	0.82	0.06	0.92	0.1	0.094	0.01	0.039	0.004
2217-48-ol65	34	0.05537	0.00309	0.70289	0.00115	0.7003	0.00115	3520	965	38	33	1651.59	43.13	0.6	0.03	31.15	0.68	7.53	0.24	13.2	0.38	0.47	0.03	4.27	0.41	0.63	0.03	1.73	0.09	0.28	0.02	1.5	0.12	0.58	0.08	0.22	0.02	0.87	0.09	1.25	0.09	0.85	0.06	0.88	0.08	0.097	0.011	0.036	0.004
2217-48-ol65	30	0.05952	0.00351	0.70256	0.00092	0.69978	0.00092	3940	779	38	32	1662.43	46.86	0.63	0.04	31.22	0.6	7.4	0.23	13.14	0.4	0.45	0.03	4.25	0.37	0.6	0.04	1.76	0.08	0.28	0.02	1.47	0.12	0.59	0.07	0.23	0.02	0.79	0.09	1.22	0.09	0.83	0.06	0.83	0.08	0.101	0.013	0.04	0.005
2217-48-ol65	27	0.0569	0.00323	0.70185	0.00134	0.6992	0.00134	4401	1132	38	24	1643.98	45.96	0.61	0.04	31.41	0.77	7.44	0.3	13.02	0.41	0.48	0.03	4	0.43	0.64	0.04	1.77	0.1	0.27	0.02	1.55	0.16	0.55	0.08	0.24	0.03	1.01	0.13	1.2	0.12	0.86	0.06	0.83	0.09	0.09	0.014	0.043	0.005
2217-48-ol65 weighted mean		0.0573	0.0016	0.70246	0.00054	0.69978	0.00056	3934	453	38	29	1643.95	21.86	0.61	0.02	31.22	0.33	7.47	0.13	13.13	0.2	0.46	0.02	4.17	0.2	0.62	0.02	1.73	0.03	0.28	0.01	1.51	0.06	0.57	0.04	0.23	0.01	0.89	0.05	1.22	0.05	0.84	0.03	0.86	0.04	0.096	0.006	0.039	0.002
[truncated: 2 more columns]

## Sheet: Table 4
Table 4. Post entrapment corrected composition of melt inclusions.
Sample-Incluison id	HOST olivine Fo	2SE (abs)	SiO2	2SE (abs)	TiO2	2SE (abs)	Al2O3	2SE (abs)	Fe2O3	FeO	2SE (abs)	MnO	2SE (abs)	MgO	2SE (abs)	CaO	2SE (abs)	Cr2O3	2SE (abs)	Na2O	2SE (abs)	K2O	2SE (abs)	Cl	2SE (abs)	P2O5	2SE (abs)	S	2SE (abs)	Total	Total+H2O	K2O/TiO2	Na2O/TiO2	Cl/TiO2	Cl/Ti	H2O/TiO2	T_CALC	T exp, oC	Size	H2O	2SD	Spot Size (µm)	Time (s)	Ti	2SE (abs)	Rb	2SE (abs)	Sr	2SE (abs)
1521-43-ol1	95.07	0.00402105	48.83	0.0828673	0.149	0.00512184	5.17	0.0214484	1.4	8.743	0.0558466	0.04	0.00425267	30.6	0.100975	4.16	0.0128452	0.113	0.00758023	0.443	0.013703	0.021	0.0011172	0.0512	0.0012238	0.01	0.00219981	0.012	0.000915568	99.73	100.06	0.14094	2.97315	0.343624	0.572707	2.21477	1517	1350	59 × 59	0.33	0.06
1521-44-ol3	95.11	0.00406646	48.59	0.113377	0.15	0.00697	5.25	0.0294	1.42	8.721	0.0802332	0.04	0.00568	30.6	0.14892	4.36	0.0180213	0.118	0.0103525	0.431	0.0183606	0.015	0.001376	0.024	0.00136	0.015	0.003178	0.014	0.0012684	99.74	100.04	0.1	2.87333	0.16	0.266667	2	1520	1350	59 × 59	0.3	0.06
1521-44-ol4	94.86	0.00382428	48.81	0.0828333	0.157	0.00526803	5.49	0.0222569	1.31	8.925	0.0555362	0.044	0.00436611	29.84	0.0970603	4.41	0.0134093	0.137	0.00792436	0.448	0.0138764	0.017	0.00107405	0.0286	0.00106947	0.016	0.00234533	0.017	0.000968581	99.64	100.05	0.10828	2.8535	0.182166	0.303609	2.61146	1505	1350	51 × 51	0.41	0.08
1521-44-ol5	94.86	0.00372395	49	0.0831558	0.146	0.00509306	5.41	0.0221876	1.35	8.892	0.0544925	0.047	0.00485122	29.79	0.098302	4.29	0.0129429	0.156	0.00919607	0.565	0.0169809	0.017	0.00104601	0.0382	0.00100753	0.015	0.00270533	0.017	0.00102459	99.73	100.06	0.116438	3.86986	0.261644	0.436073	2.26027	1509	1350	59 × 55	0.33	0.06
1521-44-ol6	94.71	0.00388428	49.05	0.0832406	0.165	0.00544477	5.47	0.022563	1.3	9.036	0.0564403	0.04	0.00443334	29.41	0.097048	4.53	0.013667	0.134	0.00814521	0.467	0.0142877	0.019	0.00113571	0.0533	0.00129054	0.015	0.00243403	0.012	0.000932703	99.69	100.06	0.115152	2.8303	0.32303	0.538384	2.24242	1501	1350	57 × 57	0.37	0.06
1521-45-ol100	94.78	0.00248552	48.46	0.0671481	0.17	0.00417637	5.75	0.0182221	1.27	9.058	0.0498559	0.032	0.00322661	29.5	0.0919719	4.67	0.0107849	0.064	0.00579863	0.499	0.0117225	0.016	0.000802521	0.0247	0.000785024	0.015	0.00179739	0.012	0.00079586	99.54	100.04	0.0941176	2.93529	0.145294	0.242157	2.94118	1500	1300	72 × 54	0.5	0.07	20	14	993.62	37.06	0.3	0.03	17.88	0.62
1521-45-ol101	94.67	0.0301657	48.76	0.0675638	0.169	0.00419582	5.82	0.0184439	1.24	9.089	0.05026	0.032	0.00327212	29.14	0.0908495	4.65	0.0109177	0.063	0.00577645	0.516	0.0119767	0.019	0.00085983	0.0499	0.000964325	0.016	0.0017897	0.014	0.000764248	99.57	100.07	0.112426	3.05325	0.295266	0.49211	2.95858	1495	1300	47 × 43	0.5	0.07	38	10	1010.72	46.7	0.32	0.05	18.41	0.69
1521-45-ol102	94.16	0.0057127	48.98	0.0678687	0.185	0.00445311	6.17	0.0194736	1.12	9.494	0.0496977	0.039	0.0034544	27.79	0.08629	4.95	0.0114964	0.081	0.00623374	0.541	0.0126279	0.016	0.000886149	0.0363	0.000918578	0.016	0.00197605	0.017	0.000869596	99.43	100.05	0.0864865	2.92432	0.196216	0.327027	3.35135	1473	1300	30 × 30	0.62	0.09
1521-45-ol103	94.84	0.00893903	48.46	0.0671481	0.172	0.00419758	5.75	0.018223	1.26	8.966	0.0496954	0.032	0.00322697	29.54	0.0932475	4.7	0.0107942	0.062	0.0060479	0.503	0.0117342	0.016	0.0007971	0.0307	0.000826112	0.013	0.00177861	0.013	0.000782871	99.51	100.04	0.0930233	2.92442	0.178488	0.297481	3.0814	1500	1300	50 × 42	0.53	0.07	38	11	956.74	36.07	0.26	0.03	18.07	0.52
1521-45-ol104	94.58	0.00868645	48.68	0.0826127	0.172	0.00518632	5.98	0.0231158	1.23	9.198	0.0613545	0.031	0.0041097	28.9	0.109672	4.71	0.0134334	0.066	0.0070774	0.528	0.0149488	0.017	0.00101657	0.0537	0.00121772	0.013	0.00223297	0.013	0.000930433	99.59	100.07	0.0988372	3.06977	0.312209	0.520349	2.7907	1493	1300	39 × 34	0.48	0.07
1521-45-ol105	95.24	0.0160013	48.26	0.0818999	0.154	0.00477728	5.3	0.0208624	1.41	8.631	0.0604204	0.029	0.00372485	30.87	0.118603	4.44	0.0125582	0.084	0.00679394	0.427	0.0129745	0.013	0.000959939	0.0279	0.000947136	0.015	0.0020797	0.013	0.000885289	99.67	100.04	0.0844156	2.77273	0.181169	0.301948	2.4026	1522	1300	38 × 32	0.37	0.05
1521-45-ol53	95.02	0.0201764	48.39	0.0670512	0.169	0.00409078	5.76	0.0178104	1.34	8.795	0.0487468	0.028	0.0031491	30.01	0.0954886	4.62	0.0104916	0.054	0.0056316	0.464	0.0110371	0.014	0.000811301	0.0272	0.000783472	0.015	0.00173862	0.015	0.000747792	99.7	100.04	0.0828402	2.74556	0.160947	0.268245	2.01183	1513	1300	30 × 30	0.34	0.05
1521-45-ol54	94.38	0.0393369	48.76	0.0675638	0.181	0.00442166	6.05	0.0192505	1.17	9.351	0.0490703	0.038	0.00353478	28.38	0.0877534	4.86	0.0113487	0.085	0.00621306	0.514	0.0121553	0.017	0.000844597	0.0754	0.00114834	0.015	0.0019109	0.011	0.000778599	99.5	100.08	0.0939227	2.83978	0.416575	0.694291	3.20442	1482	1300	35 × 25	0.58	0.08
1521-45-ol56	94.8	0.0194722	48.18	0.0817642	0.169	0.00504697	5.82	0.0222246	1.26	9.07	0.0594329	0.03	0.00385272	29.48	0.117481	4.83	0.0132079	0.064	0.00702262	0.498	0.0140856	0.015	0.000982936	0.0317	0.00100878	0.014	0.00216293	0.009	0.000909301	99.47	100.04	0.0887574	2.94675	0.187574	0.312623	3.37278	1499	1300	28 × 28	0.57	0.08
1521-45-ol57	94.53	0.0357033	48.7	0.0826466	0.179	0.00531636	6.12	0.023657	1.2	9.227	0.0608966	0.035	0.00411656	28.56	0.109053	4.84	0.0136896	0.075	0.00737288	0.543	0.0152821	0.018	0.0010454	0.0339	0.00106876	0.017	0.00235443	0.013	0.00097763	99.55	100.05	0.100559	3.03352	0.189385	0.315642	2.7933	1488	1300	37 × 32	0.5	0.05
1521-45-ol58	94.66	0.0125947	48.62	0.0673698	0.173	0.00427726	5.91	0.018653	1.21	9.112	0.0494517	0.033	0.00324029	29.04	0.0897941	4.74	0.0110077	0.06	0.00589967	0.506	0.0119613	0.017	0.000838256	0.0451	0.000945547	0.014	0.00180721	0.018	0.00081689	99.5	100.06	0.0982659	2.92486	0.260694	0.434489	3.23699	1492	1300	31 × 30	0.56	0.08
1521-45-ol59	94.7	0.0389087	48.64	0.0673976	0.168	0.0042032	5.81	0.018561	1.24	9.083	0.0484788	0.037	0.00326602	29.24	0.0904126	4.65	0.0109177	0.052	0.00581641	0.519	0.0119596	0.019	0.000865913	0.0475	0.000951488	0.015	0.00185824	0.017	0.000806392	99.54	100.06	0.113095	3.08929	0.282738	0.47123	3.09524	1496	1300	80 × 46	0.52	0.07	20	17	979.77	40.56	0.29	0.03	18.19	0.65
1521-45-ol60	95	0.0166483	48.4	0.067065	0.163	0.00407179	5.61	0.0177784	1.29	8.837	0.0487531	0.032	0.00315764	30.08	0.0937802	4.5	0.0104504	0.054	0.00547311	0.475	0.0113306	0.017	0.000793978	0.0501	0.000935426	0.016	0.00178011	0.008	0.00070469	99.54	100.06	0.104294	2.91411	0.307362	0.51227	3.19018	1506	1300	62 × 47	0.52	0.07	20	8	945.19	43.67	0.36	0.04	18.17	0.76
1521-45-ol61	95.08	0.0478864	48.29	0.0669126	0.16	0.00398662	5.49	0.0174686	1.35	8.789	0.0488266	0.033	0.00307809	30.38	0.0943273	4.43	0.0102878	0.067	0.00572664	0.506	0.0115178	0.022	0.000826834	0.0938	0.00115897	0.016	0.00183927	0.012	0.000762366	99.64	100.11	0.1375	3.1625	0.58625	0.977083	2.9375	1513	1300	75 × 65	0.47	0.07	20	19	962.32	38.69	0.4	0.03	18.86	0.65
1521-45-ol62	94.78	0.0101754	48.48	0.0671759	0.171	0.00420603	5.74	0.0183374	1.27	9.057	0.0492705	0.029	0.00327809	29.5	0.0923519	4.67	0.0108452	0.054	0.00580002	0.498	0.0117888	0.018	0.000824272	0.0496	0.000949495	0.016	0.00179517	0.014	0.000771932	99.57	100.07	0.105263	2.91228	0.290058	0.483431	2.92398	1500	1300	50 × 42	0.5	0.07	38	12	954.6	41.14	0.32	0.03	18.12	0.64
1521-45-ol63	94.79	0.0222679	48.34	0.0669819	0.162	0.00417011	5.45	0.0178305	1.21	9.111	0.0507323	0.034	0.00321405	29.83	0.0899406	4.42	0.0105478	0.089	0.00592487	0.458	0.0113239	0.018	0.000824701	0.083	0.00114159	0.013	0.00173008	0.014	0.000788795	99.23	100.1	0.111111	2.82716	0.512346	0.853909	5.37037	1492	1300	53 × 53	0.87	0.12	38	15	941.65	34.75	0.36	0.03	17.28	0.61
1521-45-ol64	94.99	0.00972406	48.18	0.0817642	0.159	0.00483856	5.56	0.0212302	1.32	8.917	0.0613713	0.031	0.00365728	30.18	0.118084	4.59	0.0127661	0.057	0.00671618	0.451	0.0132469	0.016	0.000944022	0.0481	0.00110791	0.013	0.00202231	0.014	0.000917218	99.53	100.06	0.100629	2.83648	0.302516	0.504193	3.33333	1508	1300	36 × 36	0.53	0.07
1521-45-ol65	93.95	0.0330356	49.2	0.0834952	0.185	0.00566016	6.23	0.0246695	1.08	9.629	0.0601442	0.039	0.00441328	27.26	0.102804	5.06	0.0145504	0.083	0.00795032	0.53	0.0157153	0.023	0.00113451	0.1092	0.0016679	0.015	0.00243506	0.019	0.00108765	99.46	100.13	0.124324	2.86486	0.59027	0.983784	3.62162	1464	1300	38 × 38	0.67	0.09
1521-45-ol66	94.95	0.0121397	48.46	0.0822393	0.159	0.00487202	5.55	0.0214552	1.33	8.906	0.0602464	0.031	0.00371491	30.11	0.115701	4.46	0.0126148	0.053	0.00681812	0.474	0.0136421	0.016	0.00096696	0.0321	0.000999378	0.012	0.00203294	0.015	0.000913944	99.61	100.05	0.100629	2.98113	0.201887	0.336478	2.7673	1509	1300	63 × 43	0.44	0.06	20	12	981.13	44.84	0.31	0.04	17.85	0.72
1521-45-ol67	94.71	0.0134767	48.65	0.0674114	0.171	0.00417131	5.89	0.0185899	1.25	9.074	0.0481977	0.035	0.00325157	29.27	0.0897543	4.56	0.0107064	0.069	0.00565247	0.541	0.012197	0.018	0.000820552	0.0484	0.000948272	0.014	0.00182962	0.015	0.000775661	99.6	100.06	0.105263	3.16374	0.283041	0.471735	2.69006	1498	1300	50 × 34	0.46	0.06	38	16	985.89	36.68	0.3	0.03	17.94	0.52
1521-45-ol68	94.13	0.053631	49.36	0.0683952	0.178	0.0045291	5.99	0.0194438	1.15	9.466	0.0485798	0.038	0.00368161	27.76	0.0865471	4.92	0.0115516	0.07	0.00633567	0.531	0.0126798	0.02	0.00089906	0.0622	0.00108627	0.015	0.00199067	0.017	0.000846227	99.58	100.08	0.11236	2.98315	0.349438	0.582397	2.80899	1476	1300	54 × 43	0.5	0.07	20	11	1020.07	57.74	0.36	0.07	18.96	0.91
1521-45-ol69	95.02	0.0253196	48.41	0.0670789	0.164	0.00406118	5.6	0.0176746	1.32	8.811	0.0495138	0.033	0.0031091	30.12	0.0931336	4.5	0.0103923	0.048	0.00556875	0.502	0.0114838	0.021	0.000836888	0.0729	0.0010672	0.015	0.00182858	0.01	0.000753377	99.64	100.09	0.128049	3.06098	0.444512	0.740854	2.7439	1510	1300	50 × 50	0.45	0.06	20	12	941.87	47.56	0.43	0.05	18.97	0.81
1521-45-ol70	94.97	0.0098789	48.29	0.0669126	0.164	0.00404018	5.64	0.0178009	1.32	8.913	0.0487155	0.032	0.00313145	30.07	0.0937633	4.53	0.0104626	0.061	0.00559844	0.484	0.0113219	0.02	0.000822208	0.0958	0.00118128	0.017	0.00179293	0.007	0.000746713	99.64	100.1	0.121951	2.95122	0.584146	0.973577	2.80488	1509	1300	45 × 31	0.46	0.06
1521-45-ol71-i1	95.12	0.0133119	48.29	0.0669126	0.157	0.00396271	5.35	0.0171604	1.35	8.784	0.0499258	0.031	0.00306006	30.72	0.0934107	4.27	0.0100255	0.063	0.00551088	0.443	0.0107195	0.014	0.000780927	0.0261	0.00077761	0.013	0.00170569	0.011	0.000702422	99.53	100.04	0.089172	2.82166	0.166242	0.27707	3.24841	1514	1300	75 × 58	0.51	0.07	20	8	918.37	39.12	0.23	0.03	16.15	0.51
1521-45-ol71-i2	95.12	0.0133119	48.18	0.0667602	0.161	0.00394805	5.34	0.0171283	1.34	8.797	0.0489839	0.031	0.00310974	30.66	0.0944083	4.34	0.0101898	0.066	0.00561399	0.481	0.0111147	0.017	0.00077665	0.0533	0.000953352	0.013	0.00170808	0.014	0.000724831	99.49	100.07	0.10559	2.98758	0.331056	0.55176	3.60248	1512	1300	65 × 58	0.58	0.08
1521-45-ol72	94.76	0.0125235	48.34	0.0669819	0.171	0.00417346	5.85	0.0183139	1.28	9.048	0.0484087	0.032	0.00321516	29.51	0.0935283	4.74	0.0108263	0.065	0.00570839	0.483	0.0115326	0.016	0.000819057	0.0338	0.000843484	0.016	0.00180975	0.011	0.000764309	99.59	100.04	0.0935673	2.82456	0.197661	0.329435	2.63158	1502	1300	33 × 27	0.45	0.05
1521-45-ol73	94.8	0.00623474	48.5	0.0823072	0.173	0.00506852	5.63	0.021896	1.27	9.056	0.0610488	0.035	0.00390714	29.67	0.112594	4.56	0.0130056	0.072	0.00698053	0.465	0.0138104	0.028	0.00107512	0.1546	0.00178919	0.018	0.00224439	0.007	0.00086513	99.64	100.16	0.16185	2.68786	0.893642	1.4894	3.00578	1501	1300	33 × 33	0.52	0.07
1521-45-ol74	94.45	0.0200452	48.82	0.067647	0.176	0.00432668	5.91	0.018805	1.21	9.312	0.0504179	0.033	0.00338865	28.68	0.0894154	4.75	0.0110919	0.056	0.00596932	0.519	0.0121196	0.018	0.00087349	0.0399	0.000911802	0.016	0.00186109	0.008	0.000723003	99.55	100.05	0.102273	2.94886	0.226705	0.377841	2.84091	1489	1300	74 × 43	0.5	0.07	38	11	1000.5	44.22	0.27	0.03	18.23	0.65
1521-45-ol75	94.45	0.0493142	48.69	0.0674668	0.176	0.00436556	6.06	0.0191265	1.22	9.307	0.0493162	0.034	0.00338357	28.55	0.0879112	4.87	0.0112468	0.063	0.00603737	0.534	0.0124079	0.021	0.000876473	0.0545	0.00101599	0.013	0.00188741	0.03	0.000940613	99.63	100.09	0.119318	3.03409	0.309659	0.516098	2.61364	1490	1300	49 × 35	0.46	0.06	38	13	1059.95	44.94	0.35	0.04	18.8	0.6
1521-45-ol76	95.12	0.0193885	48.07	0.0815775	0.168	0.00492995	5.61	0.0214211	1.35	8.786	0.0604697	0.03	0.00371718	30.51	0.116499	4.44	0.0125582	0.058	0.00705306	0.48	0.013667	0.015	0.000982886	0.0276	0.000949216	0.014	0.00215494	0.006	0.000844343	99.57	100.04	0.0892857	2.85714	0.164286	0.27381	2.79762	1515	1300	41 × 30	0.47	0.07
1521-45-ol77	94.22	0.0537691	48.97	0.0831048	0.18	0.00546884	6.16	0.0238116	1.15	9.463	0.0624526	0.034	0.00419916	27.98	0.105519	4.89	0.0140615	0.076	0.00761542	0.538	0.015383	0.018	0.00106448	0.0307	0.00107402	0.016	0.0023596	0.02	0.00106099	99.52	100.05	0.1	2.98889	0.170556	0.284259	2.94444	1478	1300	36 × 28	0.53	0.07
1521-45-ol78	94.81	0.0124833	48.53	0.0672451	0.166	0.00411784	5.76	0.0181796	1.24	9.087	0.0495511	0.034	0.00321708	29.36	0.0922949	4.68	0.0109284	0.07	0.00612829	0.484	0.0117926	0.015	0.000797016	0.0441	0.000916697	0.016	0.00223892	0.009	0.000725253	99.49	99.94	0.0903614	2.91566	0.265663	0.442771	2.71084	1503	1300	35 × 30	0.45	0.05
1521-45-ol79	94.73	0.00434492	48.52	0.0823412	0.165	0.00504813	5.68	0.0219561	1.29	9.038	0.0607133	0.034	0.00397485	29.71	0.114146	4.54	0.0129485	0.066	0.00669864	0.463	0.0135103	0.015	0.000973336	0.0306	0.00100565	0.013	0.00181999	0.017	0.000979715	99.6	100.16	0.0909091	2.80606	0.185455	0.309091	3.39394	1496	1300	42 × 34	0.56	0.09
1521-45-ol80	94.39	0.0659482	48.99	0.0831388	0.178	0.00532998	5.87	0.0231061	1.19	9.331	0.059822	0.041	0.0041637	28.53	0.108938	4.79	0.013774	0.056	0.00755218	0.474	0.0143693	0.016	0.00104985	0.0403	0.00113606	0.015	0.0022993	0.018	0.00102249	99.54	100.06	0.0898876	2.66292	0.226404	0.377341	2.92135	1485	1300	63 × 63	0.52	0.07	20	10	1017.74	58.32	0.28	0.05	18.64	0.83
1521-45-ol81	94.1	0.0144464	49.12	0.0833594	0.19	0.00562483	6.17	0.0241411	1.11	9.503	0.0604767	0.041	0.00440091	27.52	0.105082	5.05	0.0144031	0.073	0.00785409	0.579	0.016131	0.016	0.00106736	0.0325	0.00110311	0.016	0.00245781	0.013	0.00102775	99.42	100.04	0.0842105	3.04737	0.171053	0.285088	3.26316	1470	1300	51 × 35	0.62	0.09	38	11	1095.77	50.95	0.29	0.04	19.28	0.77
1521-45-ol82	94.79	0.0535646	48.48	0.0671759	0.172	0.00421134	5.67	0.0181138	1.28	9.051	0.0502829	0.034	0.00326597	29.53	0.0928294	4.69	0.0107713	0.052	0.00567322	0.505	0.0117344	0.02	0.00084576	0.0793	0.00111416	0.015	0.00191473	0.012	0.000761162	99.59	100.09	0.116279	2.93605	0.461047	0.768411	2.90698	1501	1300	63 × 42	0.5	0.07	20	17	996.05	30.48	0.36	0.03	18.24	0.43
1521-45-ol83	95.07	0.00606106	48.23	0.0668294	0.17	0.00406362	5.6	0.0176746	1.34	8.796	0.0487524	0.03	0.00320234	30.31	0.0944972	4.48	0.0104039	0.066	0.00572457	0.495	0.011508	0.019	0.000797419	0.0495	0.000924847	0.017	0.00179636	0.01	0.000738223	99.61	100.06	0.111765	2.91176	0.291176	0.485294	2.64706	1513	1300	70 × 46	0.45	0.06
1521-45-ol84	94.96	0.00299813	48.33	0.066968	0.164	0.00407379	5.6	0.0178186	1.32	8.914	0.0492939	0.032	0.00316541	30.11	0.0931027	4.49	0.0104847	0.061	0.00555384	0.476	0.0113534	0.02	0.000809621	0.0894	0.00115282	0.014	0.00175857	0.012	0.00075107	99.63	100.11	0.121951	2.90244	0.545122	0.908537	2.92683	1508	1300	37 × 33	0.48	0.07
1521-45-ol85	94.95	0.0229448	48.33	0.066968	0.169	0.00408986	5.55	0.0177304	1.29	8.939	0.0501187	0.031	0.0031255	30.12	0.0927455	4.44	0.0104246	0.071	0.00569723	0.466	0.0112185	0.014	0.000784461	0.0257	0.000782435	0.014	0.0017735	0.012	0.000740956	99.47	100.04	0.0828402	2.7574	0.152071	0.253452	3.37278	1505	1300	57 × 48	0.57	0.08
1521-45-ol86	94.64	0.0172539	48.55	0.0672729	0.173	0.00424636	5.79	0.0184971	1.24	9.183	0.0491309	0.034	0.00326248	29.15	0.0908807	4.74	0.0109466	0.066	0.0058276	0.502	0.0118131	0.02	0.000840616	0.092	0.00120168	0.018	0.00190636	0.012	0.000790434	99.58	100.1	0.115607	2.90173	0.531792	0.88632	3.00578	1495	1300	55 × 40	0.52	0.07	20	12	1044.71	72.61	0.42	0.06	18.38	1.08
1521-45-ol87	94.81	0.0347103	48.49	0.0671897	0.164	0.00412474	5.65	0.0179777	1.29	9.044	0.0498951	0.031	0.00320579	29.71	0.0926266	4.55	0.0106248	0.056	0.00572676	0.492	0.0115394	0.019	0.000809706	0.0565	0.000990936	0.015	0.00176149	0.013	0.000749603	99.57	100.07	0.115854	3	0.344512	0.574187	3.04878	1502	1300	57 × 31	0.5	0.07	20	10	943.47	48.78	0.39	0.07	17.94	0.79
1521-45-ol88	95.05	0.00282567	48.17	0.0667463	0.167	0.00404792	5.7	0.0178443	1.32	8.812	0.049181	0.029	0.00310468	30.1	0.0950058	4.63	0.0105153	0.061	0.00554266	0.501	0.0115464	0.016	0.000817378	0.0297	0.000803882	0.015	0.0017983	0.01	0.00075215	99.57	100.04	0.0958084	3	0.177844	0.296407	2.81437	1510	1300	74 × 36	0.47	0.07
1521-45-ol89	94.74	0.00429834	48.45	0.0822224	0.169	0.0052023	5.6	0.0223073	1.22	9.104	0.0587958	0.035	0.00412214	29.44	0.112413	4.7	0.0132936	0.095	0.00751703	0.461	0.0139953	0.018	0.00106248	0.0757	0.00136516	0.014	0.00221103	0.012	0.000928531	99.39	100.09	0.106509	2.72781	0.447929	0.746548	4.14201	1492	1300	33 × 33	0.7	0.1
1521-45-ol90	94.59	0.0115107	48.85	0.0676885	0.166	0.00418317	5.71	0.0182416	1.24	9.19	0.0496394	0.034	0.00327995	29.14	0.0897279	4.58	0.0107533	0.07	0.0058352	0.486	0.0116551	0.016	0.000812254	0.0338	0.000861746	0.014	0.00182436	0.015	0.000820528	99.54	100.05	0.0963855	2.92771	0.203614	0.339357	3.07229	1493	1300	66 × 38	0.51	0.07	20	10	1028	49.14	0.32	0.06	17.31	0.83
1521-45-ol91	94.91	0.0356571	48.35	0.0676217	0.168	0.00414719	5.74	0.0181904	1.3	8.933	0.0496274	0.03	0.00314302	29.82	0.0933537	4.6	0.0106826	0.064	0.00567782	0.498	0.0116495	0.018	0.000842714	0.049	0.00093742	0.013	0.00179373	0.007	0.000706793	99.59	100.05	0.107143	2.96429	0.291667	0.486111	2.7381	1506	1300	44 × 31	0.46	0.06	38	6	963.26	52.02	0.28	0.05	17.75	0.8
1521-45-ol92	94.92	0.00900818	48.57	0.0673006	0.165	0.00413033	5.68	0.0180003	1.35	8.889	0.0493821	0.032	0.00316096	29.86	0.0915635	4.56	0.0106482	0.071	0.0057452	0.486	0.0114856	0.015	0.000832752	0.0247	0.000783031	0.017	0.00191097	0.015	0.000796888	99.72	100.04	0.0909091	2.94545	0.149697	0.249495	1.93939	1511	1300	49 × 38	0.32	0.04	38	12	963.35	35.74	0.26	0.03	17.35	0.53
1521-45-ol93	94.9	0.0243639	48.57	0.0679294	0.177	0.00418585	5.54	0.0179126	1.3	8.931	0.0507613	0.031	0.003232	29.91	0.0936355	4.48	0.0105763	0.073	0.00571066	0.479	0.0115362	0.025	0.000874453	0.1317	0.0013636	0.015	0.00182429	0.011	0.000726535	99.67	100.15	0.141243	2.70621	0.744068	1.24011	2.71186	1505	1300	46 × 46	0.48	0.07	38	14	962.44	37.44	0.46	0.04	17.89	0.54
1521-45-ol94	95.04	0.0325579	48.17	0.0667463	0.167	0.00403703	5.65	0.0177602	1.31	8.82	0.0489988	0.031	0.0031343	30.12	0.0950642	4.65	0.0105597	0.059	0.00554199	0.481	0.0112996	0.013	0.000768788	0.0255	0.000769336	0.015	0.00178104	0.011	0.000723636	99.52	100.03	0.0778443	2.88024	0.152695	0.254491	3.05389	1509	1300	50 × 35	0.51	0.07	38	11	1010.36	39.2	0.25	0.03	17.83	0.55
1521-45-ol95	94.78	0.0339458	48.42	0.0670927	0.163	0.00415794	5.74	0.0181904	1.26	9.068	0.0492129	0.033	0.00325597	29.54	0.0917192	4.63	0.0106925	0.058	0.00572521	0.505	0.0117209	0.017	0.000833839	0.0278	0.000812919	0.015	0.00186333	0.011	0.000723666	99.49	100.04	0.104294	3.09816	0.170552	0.284254	3.37423	1499	1300	50 × 45	0.55	0.08	20	9	947.17	51.05	0.26	0.04	17.21	0.82
1521-45-ol96	94.49	0.0218493	48.82	0.0828503	0.178	0.00533351	6.03	0.0233091	1.19	9.228	0.0606846	0.034	0.00417362	28.55	0.109015	4.82	0.013633	0.063	0.00739693	0.542	0.015164	0.018	0.00107355	0.0424	0.00115339	0.016	0.00224731	0.014	0.000951177	99.55	100.06	0.101124	3.04494	0.238202	0.397004	2.86517	1487	1300	50 × 35	0.51	0.07	38	7	1016.91	48.51	0.34	0.04	17.9	0.72
1521-45-ol98	95.08	0.0176786	48.51	0.0672174	0.156	0.00397563	5.32	0.0172004	1.37	8.774	0.0489682	0.031	0.00305535	30.48	0.0954199	4.37	0.0102603	0.061	0.00561754	0.472	0.0111431	0.016	0.000810836	0.0273	0.000768657	0.015	0.00182275	0.014	0.000779917	99.61	100.04	0.102564	3.02564	0.175	0.291667	2.75641	1514	1300	67 × 56	0.43	0.06	38	26	937.33	32.9	0.3	0.02	16.85	0.39
1521-45-ol99	95.14	0.024765	48.12	0.066677	0.167	0.00399869	5.53	0.0174537	1.37	8.77	0.0499585	0.029	0.00301136	30.66	0.0944083	4.38	0.0102279	0.058	0.00545892	0.454	0.0108463	0.023	0.000811248	0.1404	0.00136724	0.016	0.00170712	0.014	0.000760544	99.72	100.16	0.137725	2.71856	0.840719	1.4012	2.63473	1517	1300	39 × 33	0.44	0.06
1521-47-ol1	94.67	0.00654996	49.06	0.0698679	0.162	0.00433693	5.62	0.0188917	1.27	9.061	0.0475476	0.032	0.00322041	29.27	0.0916319	4.51	0.0108208	0.081	0.00587093	0.494	0.0124606	0.015	0.000775277	0.037	0.000914818	0.016	0.00204075	0.017	0.000776701	99.64	100.05	0.0925926	3.04938	0.228395	0.380658	2.53086	1498	1310	42 × 37	0.41	0.08	38	10	961.37	35.96	0.29	0.03	17.35	0.48
1521-47-ol2	94.4	0.0361043	49.1	0.0699248	0.166	0.00451543	5.64	0.0194654	1.19	9.328	0.0460765	0.037	0.00340811	28.72	0.0895401	4.58	0.011165	0.101	0.00619653	0.516	0.0130517	0.017	0.000818134	0.0853	0.00123668	0.015	0.00212123	0.015	0.000879108	99.51	100.1	0.10241	3.10843	0.513855	0.856426	3.55422	1484	1310	46 × 38	0.59	0.03	38	11	1030.91	38.87	0.4	0.03	18.01	0.54
2222-48-ol2	95.1	0.00178394	48.51	0.0970745	0.142	0.00584332	5.14	0.0964994	1.35	8.79	0.0771552	0.036	0.00330781	30.78	0.546528	4.14	0.0508448	0.11	0.00648684	0.428	0.0131645	0.015	0.00110262	0.0262	0.000956486	0.013	0.00310674	0.013	0.000953449	99.5	100.04	0.105634	3.01408	0.184507	0.307512	3.80282	1512	1350	49 × 45	0.54	0.11	38	13	861.06	37.03	0.26	0.02	16.38	0.37
2222-48-ol20	95.23	0.0473339	48.77	0.132216	0.156	0.0104104	5.47	0.0332191	1.56	8.502	0.0938384	0.037	0.00402888	30.52	0.665258	4.38	0.0584053	0.106	0.0145578	0.431	0.0158806	0.015	0.00174496	0.0285	0.00101243	0.011	0.00228835	0.008	0.000837759	99.98	100.04	0.0961538	2.76282	0.182692	0.304487	0.384615	1538	1350	50 × 28	0.06	0.01	38	14	915.93	41.86	0.25	0.02	16.03	0.45
2222-48-ol21	94.92	0.0523339	48.82	0.0831668	0.146	0.0073402	5.27	0.0238793	1.31	8.927	0.0599092	0.039	0.00405922	30.15	0.161625	4.23	0.0163938	0.127	0.00989654	0.455	0.0130667	0.017	0.000969397	0.0479	0.0016888	0.012	0.00423946	0.015	0.00119982	99.55	100.06	0.116438	3.11644	0.328082	0.546804	3.49315	1504	1350	42 × 43	0.51	0.03	38	21	902.03	36.62	0.31	0.02	17	0.35
1522-34-ol21	94.52	0.0244594	48.8	0.184656	0.178	0.0027031	5.9	0.0107678	1.2	9.219	0.015891	0.037	0.000740113	28.44	0.0791558	4.87	0.0208816	0.059	0.00592385	0.685	0.00702181	0.035	0.000642188	0.1963	0.00113168	0.016	0.00047588	0.01	0.000483156	99.64	100.2	0.196629	3.84831	1.10281	1.83801	3.14607	1487	1280	60 × 60	0.56	0.12	38	19	1100.15	181.08	0.73	0.11	24.78	3.97
1522-34-ol50	94.89	0.0293267	48.62	0.0848028	0.159	0.00502602	5.38	0.0218109	1.28	8.949	0.0601154	0.028	0.00357992	29.85	0.122421	4.42	0.01271	0.045	0.00663214	0.614	0.0160786	0.013	0.000866208	0.0295	0.00100409	0.011	0.00220264	0.013	0.000903786	99.41	100.04	0.081761	3.86164	0.185535	0.309224	3.96226	1501	1280	60 × 47	0.63	0.08	38	18	966.5	33.05	0.28	0.02	17.14	0.41
1522-34-ol51	94.63	0.0119218	48.61	0.069227	0.182	0.00433293	5.68	0.018583	1.23	9.198	0.0489746	0.027	0.00303811	29.11	0.0963582	4.58	0.0107533	0.056	0.00549857	0.652	0.0137859	0.018	0.00078591	0.0578	0.00101973	0.017	0.00201349	0.007	0.000718512	99.41	100.07	0.0989011	3.58242	0.317582	0.529304	3.62637	1492	1280	54 × 38	0.66	0.09
1522-34-ol52	94.62	0.0214676	48.71	0.0693694	0.179	0.00428133	5.53	0.0183051	1.24	9.191	0.0491729	0.032	0.00304456	29.14	0.0975791	4.63	0.0106925	0.05	0.00544715	0.619	0.0134138	0.019	0.000759439	0.088	0.00117875	0.016	0.0019438	0.007	0.000630337	99.45	100.1	0.106145	3.4581	0.49162	0.819367	3.63128	1492	1280	50 × 35	0.65	0.04	38	21	1064.1	37.14	0.43	0.02	19.4	0.47
1522-34-ol53	94.81	0.00573496	48.57	0.06917	0.17	0.00418343	5.41	0.0179079	1.28	9.047	0.0480542	0.032	0.0030023	29.62	0.0991865	4.53	0.0104616	0.057	0.00542693	0.638	0.0134987	0.017	0.00074421	0.0561	0.000992579	0.013	0.00195059	0.009	0.000672232	99.45	100.06	0.1	3.75294	0.33	0.55	3.58824	1500	1280	72 × 60	0.61	0.04	38	12	968.7	40.59	0.35	0.03	17.69	0.47
1522-34-ol54	94.69	0.0114596	49.03	0.0698251	0.165	0.00424765	5.36	0.0179487	1.26	9.07	0.0481764	0.031	0.00303891	29.26	0.097981	4.53	0.0106359	0.055	0.00552255	0.63	0.0135392	0.022	0.000800713	0.0837	0.00115874	0.017	0.00191698	0.012	0.000701836	99.52	100.09	0.133333	3.81818	0.507273	0.845455	3.45455	1495	1280	70 × 53	0.57	0.04	38	14	981.79	37.5	0.45	0.03	18.51	0.55
1522-34-ol55	94.3	0.0231501	49.08	0.0698963	0.178	0.00449679	5.83	0.0192981	1.15	9.372	0.0483376	0.032	0.00323206	28.07	0.0939961	4.82	0.0113168	0.062	0.00585867	0.677	0.0143929	0.018	0.000804238	0.0595	0.00106647	0.017	0.00200713	0.006	0.000653992	99.35	100.07	0.101124	3.80337	0.33427	0.557116	4.04494	1476	1280	52 × 46	0.72	0.05	38	9	1111.46	44.01	0.4	0.03	19.88	0.56
1522-34-ol56	94.68	0.0146698	48.99	0.0697682	0.164	0.00428159	5.52	0.0184172	1.24	9.085	0.0486066	0.027	0.0030212	29.27	0.0991453	4.4	0.0106322	0.043	0.00561987	0.639	0.0137243	0.017	0.000773348	0.063	0.00106538	0.015	0.00194731	0.00948625	0.000653652	99.61	100.2	0.103659	3.89634	0.384146	0.640244	3.59756	1494	1280	64 × 52	0.59	0.05	38	14	961.1	34.31	0.37	0.02	17.58	0.46
1522-34-ol57	94.51	0.0462913	49	0.0697824	0.178	0.00439429	5.59	0.0187189	1.2	9.221	0.0464941	0.035	0.00315519	28.66	0.0959718	4.7	0.0110351	0.042	0.00574889	0.678	0.0142834	0.032	0.000876961	0.1925	0.00165969	0.013	0.00192054	0.012	0.000716856	99.55	100.21	0.179775	3.80899	1.08146	1.80243	3.70787	1486	1280	65 × 51	0.66	0.09	38	21	1026.24	39.72	0.7	0.04	23.46	0.63
1522-34-ol58	94.87	0.0149799	48.46	0.0690134	0.174	0.00420964	5.54	0.0181249	1.27	8.962	0.0489826	0.028	0.00301781	29.7	0.0994544	4.52	0.0104385	0.057	0.00538653	0.622	0.0132795	0.018	0.000768838	0.0928	0.00119063	0.015	0.00192122	0.01	0.000684851	99.47	100.11	0.103448	3.57471	0.533333	0.888889	3.67816	1500	1280	48 × 39	0.64	0.08	38	13	1008.1	35.79	0.37	0.02	17	0.44
1522-34-ol59	94.31	0.038674	49.16	0.0700103	0.181	0.00448712	5.84	0.0193312	1.17	9.348	0.048454	0.035	0.00321507	28.07	0.0939961	4.84	0.0111775	0.042	0.00578855	0.683	0.0144681	0.02	0.000818414	0.0805	0.00117328	0.017	0.0020789	0.01	0.000755156	99.49	100.09	0.110497	3.77348	0.444751	0.741252	3.31492	1480	1280	68 × 57	0.6	0.17	38	16	1086.94	36.96	0.44	0.03	20.42	0.54
1522-34-ol60	94.51	0.0333991	49.17	0.0700245	0.167	0.00436621	5.54	0.0185514	1.23	9.197	0.0482613	0.035	0.00311591	28.71	0.0972443	4.71	0.0109985	0.047	0.00591226	0.632	0.0136633	0.019	0.000780313	0.0678	0.00109518	0.016	0.00201829	0.013	0.000741274	99.54	100.08	0.113772	3.78443	0.405988	0.676647	3.23353	1489	1280	82 × 82	0.54	0.01	38	19	1004.8	30.24	0.39	0.02	19.13	0.34
1522-47-ol1	94.6	0.0245053	48.8	0.0694976	0.173	0.00450066	5.38	0.0188439	1.22	9.205	0.0445241	0.039	0.00333153	29.12	0.0915359	4.68	0.0111683	0.092	0.00609588	0.544	0.0132903	0.022	0.000855536	0.1317	0.00145152	0.014	0.00204959	0.007	0.000745784	99.43	100.14	0.127168	3.14451	0.761272	1.26879	4.10405	1488	1310	39 × 31	0.71	0.08	38	9	999.21	38.77	0.5	0.03	20.27	0.59
1522-47-ol10	94.44	0.0134066	49.35	0.0702808	0.159	0.0044575	5.4	0.018914	1.26	9.266	0.0418471	0.049	0.00339479	28.75	0.0907402	4.62	0.0112029	0.058	0.00595862	0.603	0.0138879	0.018	0.000827047	0.0704	0.00114714	0.016	0.00206412	0.015	0.000789363	99.64	100.08	0.113208	3.79245	0.442767	0.737945	2.7673	1491	1310	140 × 116	0.44	0.04	38	26	987.04	26.45	0.4	0.01	18.54	0.25
1522-47-ol11	94.98	0.0051397	48.6	0.0692128	0.16	0.00416865	5.19	0.0177789	1.35	8.887	0.0450392	0.033	0.00302212	30.22	0.0953798	4.42	0.0104914	0.081	0.00562681	0.542	0.0126491	0.018	0.000768174	0.066	0.00106614	0.015	0.00192158	0.007	0.000696944	99.58	100.07	0.1125	3.3875	0.4125	0.6875	3.0625	1509	1310	59 × 49	0.49	0.07	38	14	962.63	34.27	0.37	0.03	17.96	0.49
1522-47-ol12	94.86	0.0128184	48.42	0.0689564	0.173	0.00442938	5.55	0.0190121	1.25	8.975	0.0438719	0.035	0.00323235	29.71	0.0918658	4.52	0.0109027	0.09	0.00594025	0.577	0.0133929	0.017	0.000781725	0.0764	0.00115567	0.013	0.00203535	0.009	0.000732345	99.42	100.09	0.0982659	3.33526	0.441618	0.736031	3.87283	1499	1310	34 × 34	0.67	0.06
1522-47-ol13	94.94	0.0125913	48.67	0.0693124	0.164	0.00425603	5.26	0.0180187	1.33	8.908	0.0458305	0.033	0.00312303	30.09	0.0938113	4.33	0.0104997	0.085	0.00571789	0.584	0.013182	0.015	0.000746026	0.0538	0.00100021	0.013	0.00186443	0.01	0.000728155	99.54	100.06	0.0914634	3.56098	0.328049	0.546748	3.17073	1507	1310	45 × 37	0.52	0.09	38	7	974.52	38.1	0.3	0.02	17.57	0.52
1522-47-ol14	94.96	0.0214781	48.63	0.0692555	0.16	0.00415707	5.31	0.0179856	1.35	8.886	0.0460593	0.034	0.00309804	30.2	0.0941543	4.31	0.0102853	0.082	0.00555151	0.569	0.0128997	0.018	0.000756522	0.0849	0.00116123	0.016	0.00191787	0.01	0.000722745	99.65	100.09	0.1125	3.55625	0.530625	0.884375	2.75	1511	1310	54 × 46	0.44	0.09	38	11	969.69	41.02	0.39	0.03	18.16	0.54
1522-47-ol15	94.87	0.0691746	48.81	0.0695118	0.163	0.00429238	5.34	0.0182928	1.31	8.927	0.0453553	0.037	0.00316259	29.77	0.0939595	4.51	0.0107626	0.063	0.0057279	0.554	0.012937	0.015	0.000759051	0.0492	0.000989184	0.013	0.00199784	0.009	0.000694739	99.57	100.06	0.0920245	3.39877	0.30184	0.503067	3.00613	1504	1310	72 × 55	0.49	0.02	38	21	998.5	33.95	0.35	0.02	17.11	0.43
1522-47-ol16	94.97	0.0114138	48.7	0.0849424	0.157	0.00514386	5.16	0.0222572	1.36	8.873	0.0493585	0.038	0.0033137	30.23	0.117569	4.39	0.0129346	0.068	0.00537859	0.549	0.016448	0.018	0.000947081	0.0788	0.00195392	0.014	0.00287834	0.01	0.000692845	99.64	100.09	0.11465	3.49682	0.501911	0.836518	2.86624	1511	1310	89 × 83	0.45	0.03
1522-47-ol17	94.95	0.0189921	48.66	0.0692982	0.16	0.00424945	5.23	0.0179833	1.33	8.901	0.0456802	0.035	0.00317414	30.13	0.0950957	4.36	0.0105724	0.09	0.00574884	0.566	0.0129991	0.019	0.000772525	0.0809	0.00114903	0.018	0.00199604	0.008	0.00071344	99.58	100.08	0.11875	3.5375	0.505625	0.842708	3.125	1508	1310	56 × 44	0.5	0.08	38	11	938.84	40.28	0.41	0.03	16.87	0.49
1522-47-ol2	94.48	0.0248564	49.23	0.07011	0.17	0.00452803	5.55	0.0192972	1.22	9.203	0.0447506	0.043	0.00337663	28.64	0.090393	4.73	0.0112876	0.087	0.00612278	0.578	0.0137489	0.018	0.000824957	0.0764	0.00119006	0.014	0.00202695	0.013	0.000762338	99.57	100.09	0.105882	3.4	0.449412	0.74902	3.05882	1487	1310	60 × 55	0.52	0.05	38	17	1031.93	36.53	0.42	0.02	19.52	0.49
1522-47-ol3	94.46	0.0469187	49.16	0.0700103	0.176	0.00457939	5.59	0.0193643	1.21	9.208	0.0446564	0.039	0.00339113	28.51	0.0910801	4.88	0.0115207	0.081	0.00606786	0.581	0.0137684	0.018	0.000804737	0.0919	0.00126871	0.014	0.00211958	0.011	0.000753307	99.58	100.11	0.102273	3.30114	0.522159	0.870265	3.01136	1486	1310	50 × 43	0.53	0.12	38	17	1062.46	38.35	0.42	0.02	19.81	0.51
1522-47-ol4	94.74	0.0506606	48.85	0.0695688	0.172	0.00444475	5.39	0.0186715	1.27	9.061	0.0458039	0.036	0.00328968	29.48	0.0922893	4.48	0.0108634	0.095	0.00603501	0.581	0.0134791	0.017	0.000785342	0.0617	0.0010806	0.012	0.00189063	0.011	0.000733506	99.51	100.07	0.0988372	3.37791	0.358721	0.597868	3.25581	1497	1310	46 × 38	0.56	0.05	38	10	986.81	36.71	0.35	0.03	17.57	0.62
1522-47-ol5	94.61	0.00643113	48.74	0.0694121	0.185	0.00459017	5.51	0.0191589	1.24	9.188	0.0451492	0.039	0.00331946	29.04	0.0909348	4.76	0.0113602	0.107	0.00627784	0.565	0.0134551	0.018	0.00080358	0.0772	0.00118583	0.018	0.00210696	0.006	0.000670232	99.49	100.09	0.0972973	3.05405	0.417297	0.695495	3.24324	1491	1310	35 × 35	0.6	0.04
1522-47-ol6	94.94	0.0106416	48.5	0.0690703	0.171	0.0043251	5.32	0.0182243	1.31	8.926	0.0455795	0.035	0.00312627	30.04	0.0940424	4.48	0.010691	0.085	0.00590624	0.539	0.012836	0.016	0.000750139	0.0753	0.00112848	0.013	0.00191415	0.008	0.000703256	99.51	100.08	0.0935673	3.15205	0.440351	0.733918	3.33333	1505	1310	48 × 33	0.57	0.17	38	12	975.71	37.27	0.37	0.03	17.93	0.53
1522-47-ol7	95.03	0.0201318	48.72	0.0693836	0.155	0.00422653	5.21	0.0179145	1.35	8.792	0.0450086	0.034	0.00315387	30.28	0.0955692	4.35	0.0104927	0.068	0.00563355	0.548	0.0128039	0.013	0.000723072	0.0268	0.000821644	0.011	0.00178384	0.009	0.000668488	99.56	100.03	0.083871	3.53548	0.172903	0.288172	3.03226	1510	1310	66 × 53	0.47	0.04	38	13	931.64	32.89	0.26	0.03	16.45	0.42
1522-47-ol8	94.82	0.0197422	48.79	0.0694833	0.168	0.00441522	5.43	0.0188101	1.27	8.955	0.0451528	0.04	0.00322788	29.53	0.0939613	4.59	0.0110127	0.087	0.00598571	0.57	0.013369	0.02	0.000816014	0.0968	0.00126804	0.014	0.00198949	0.012	0.000731893	99.57	100.11	0.119048	3.39286	0.57619	0.960317	3.21429	1499	1310	42 × 35	0.54	0.09
1522-47-ol9	94.8	0.04554	48.72	0.0693836	0.165	0.00428113	5.33	0.0183271	1.28	9.047	0.0446884	0.036	0.00314058	29.75	0.0927513	4.39	0.0106461	0.084	0.00578547	0.573	0.0131976	0.017	0.000784838	0.0799	0.00116341	0.014	0.00191928	0.033	0.00183731	99.53	100.11	0.10303	3.47273	0.484242	0.807071	3.51515	1500	1310	38 × 33	0.58	0.04
2218-48-ol1	94.96	0.00618854	48.3	0.822349	0.182	0.00723455	5.42	0.0944738	1.37	8.868	0.123613	0.043	0.00442696	30.03	0.167398	4.6	0.0864385	0.155	0.0105426	0.584	0.016122	0.035	0.0015345	0.2047	0.00263186	0.024	0.00383903	0.011	0.00091025	99.82	100.22	0.192308	3.20879	1.12473	1.87454	2.1978	1513	1350	45 × 38	0.4	0.05	38	13	1063.99	41.28	0.74	0.05	25.62	0.73
2218-48-ol17	95.1	0.0225383	48.49	0.0992051	0.148	0.00471902	5.17	0.0269232	1.37	8.768	0.0503319	0.04	0.00467548	30.56	0.164594	4.29	0.0264698	0.128	0.00836693	0.531	0.0191519	0.016	0.00139449	0.0297	0.00119403	0.012	0.0027655	0.008	0.000850827	99.56	100.03	0.108108	3.58784	0.200676	0.334459	3.17568	1514	1350	57 × 48	0.47	0.01	38	18	934.98	30.48	0.27	0.02	16.41	0.44
2218-48-ol3	94.67	0.0203626	49.18	0.146335	0.179	0.00652297	5.69	0.0218401	1.44	8.905	0.0410177	0.05	0.00690258	28.86	0.193368	4.82	0.0326706	0.163	0.00848167	0.606	0.0287226	0.023	0.00173035	0.0997	0.00190245	0.017	0.00256107	0.013	0.00105041	100.04	100.11	0.128492	3.38547	0.556983	0.928305	0.391061	1518	1350	48 × 41	0.07	0.09	38	10	1043.09	39.43	0.43	0.04	19.94	0.51
2218-48-ol6	94.88	0.0087511	48.46	0.0836529	0.167	0.00585434	5.46	0.0310833	1.29	8.94	0.062765	0.045	0.00552595	29.79	0.117988	4.49	0.0151241	0.15	0.00823111	0.601	0.0194205	0.028	0.00102359	0.1528	0.00311878	0.018	0.00358552	0.015	0.000854799	99.6	100.17	0.167665	3.5988	0.91497	1.52495	3.41317	1503	1350	54 × 50	0.57	0.13	38	14	1027.1	36.05	0.6	0.04	19.8	0.61
2218-48-ol7	94.95	0.0135527	48.54	0.116915	0.158	0.00854326	5.23	0.0378983	1.37	8.869	0.102776	0.038	0.00345208	30.27	0.223294	4.37	0.0533048	0.138	0.0129058	0.555	0.0174961	0.015	0.00145212	0.0288	0.0011396	0.011	0.00368784	0.015	0.0011785	99.61	100.04	0.0949367	3.51266	0.182278	0.303797	2.72152	1512	1350	60 × 48	0.43	0.01	38	16	956.66	31.76	0.27	0.02	16.67	0.41
2218-48-ol9	94.74	0.0341691	48.71	0.182088	0.176	0.00822154	5.67	0.0382853	1.27	9.061	0.0626229	0.046	0.00414737	29.1	0.0990812	4.71	0.0282567	0.154	0.00932069	0.613	0.0169263	0.025	0.00191451	0.1395	0.00180784	0.014	0.00372872	0.016	0.00167335	99.7	100.16	0.142045	3.48295	0.792614	1.32102	2.61364	1498	1350	40 × 38	0.46	0.11	38	10	1052.41	39.47	0.5	0.03	20.88	0.52
1523B-28-ol133	93.7	0.00681251	49.66	0.176012	0.181	0.00181197	5.88	0.0303459	1.08	9.727	0.00135281	0.069	0.00341372	26.57	0.305455	5.29	0.0696009	0.289	0.00912988	0.593	0.00165266	0.026	9.58789e-05	0.0785	0.00152232	0.022	0.000222347	0.02	0.00131402	99.48	100.1	0.143646	3.27624	0.433702	0.722836	3.42541	1456	1400	54 × 54	0.62	0.1	38	19	1064.18	167.71	0.51	0.09	19.7	3.22
1523B-28-ol134	93.51	0.00824134	50.18	0.622232	0.196	0.0098784	6.16	0.0398347	1.19	9.732	0.071368	0.078	0.0084396	25.95	0.10207	5.4	0.06048	0.32	0.0108373	0.608	0.037696	0.026	0.0032188	0.1073	0.00326907	0.028	0.0092456	0.01	0.002928	99.98	100.12	0.132653	3.10204	0.547449	0.912415	0.714286	1470	1400	51 × 51	0.14	0.02	38	16	1120.26	184.84	0.56	0.09	21.9	3.48
1523B-28-ol153	93.72	0.00292269	49.65	0.0732807	0.181	0.00201915	6	0.00522587	1.07	9.741	0.0292159	0.071	0.0012697	26.67	0.0618274	5.06	0.0190564	0.291	0.00141885	0.594	0.0173549	0.025	0.000813436	0.068	0.00212813	0.017	0.00333462	0.021	0.00105373	99.45	100.09	0.138122	3.28177	0.375691	0.626151	3.53591	1456	1400	60 × 60	0.64	0.1	38	14	1190.43	201.3	0.39	0.1	21.61	3.83
1523B-28-ol157	93.49	0.0177702	49.88	0.222765	0.18	0.00180246	5.99	0.0457499	1.04	9.868	0.0850883	0.071	0.00220807	26.26	0.264363	5.07	0.0188763	0.259	0.00345547	0.616	0.00567863	0.024	0.000985337	0.0592	0.000805262	0.022	0.00391854	0.019	0.00137578	99.37	100.08	0.133333	3.42222	0.328889	0.548148	3.94444	1448	1400	60 × 60	0.71	0.1	38	14	1033.13	203.32	0.32	0.05	19.38	3.37
1523B-28-ol162	93.58	0.0112025	49.82	0.159868	0.176	0.00439915	5.88	0.0154907	1.09	9.82	0.00731609	0.072	0.00147603	26.51	0.0896684	5.17	0.0382733	0.265	0.0020842	0.584	0.0117409	0.022	0.0010936	0.0648	0.00154402	0.025	0.00549431	0.018	0.000862225	99.52	100.08	0.125	3.31818	0.368182	0.613636	3.18182	1456	1400	63 × 63	0.56	0.1	38	21	1149.51	175.99	0.44	0.11	21.01	3.36
1523B-34-ol12	93.65	0.00484514	49.62	0.175324	0.19	0.00834733	6.37	0.0352473	1.02	9.782	0.0834731	0.046	0.00651973	26.18	0.123919	5.21	0.0534893	0.066	0.0071808	0.71	0.034506	0.03	0.002692	0.1166	0.00289945	0.014	0.0075012	0.013	0.00242753	99.37	100.13	0.157895	3.73684	0.613684	1.02281	4	1449	1280	75 × 75	0.76	0.45	38	11	1041.11	189.17	0.51	0.12	20.62	3.45
1523B-34-ol27	93.25	0.0161761	49.77	0.175854	0.2	0.00856	6.37	0.035672	0.99	10.012	0.0854357	0.048	0.0067392	25.67	0.121505	5.31	0.05487	0.081	0.0074844	0.652	0.033904	0.034	0.002788	0.1528	0.00321899	0.028	0.00770187	0.021	0.0026572	99.35	100.18	0.17	3.26	0.764	1.27333	4.15	1439	1280	54 × 54	0.83	0.15	38	23	1124.96	177.63	0.7	0.12	23	3.6
1523B-45-ol106	93.51	0.0261597	49.71	0.0688802	0.186	0.00490047	6.05	0.02057	1	9.901	0.0472551	0.052	0.00392088	26.31	0.0800011	5.02	0.0122376	0.115	0.00703624	0.652	0.0146558	0.021	0.000967828	0.0921	0.00131281	0.019	0.00221164	0.016	0.000936274	99.14	100.11	0.112903	3.50538	0.495161	0.825269	5.21505	1444	1300	50 × 50	0.97	0.14
1523B-45-ol107	93.82	0.00726491	49.56	0.0686724	0.18	0.00469077	6.03	0.0199602	1.09	9.721	0.0483919	0.043	0.00372629	27.07	0.083354	4.9	0.0116933	0.094	0.00664322	0.629	0.0138736	0.02	0.000921946	0.079	0.00121945	0.014	0.00199922	0.013	0.000874315	99.43	100.09	0.111111	3.49444	0.438889	0.731481	3.66667	1462	1300	57 × 42	0.66	0.09
1523B-45-ol108	93.56	0.0116321	49.69	0.0688525	0.185	0.00484585	6.15	0.0203574	1.04	9.867	0.0470928	0.049	0.00385694	26.33	0.0814146	5.13	0.0121767	0.087	0.00669235	0.664	0.0145431	0.02	0.00097347	0.0563	0.00110958	0.019	0.00218176	0.014	0.000886896	99.31	100.07	0.108108	3.58919	0.304324	0.507207	4.10811	1450	1300	51 × 42	0.76	0.11	38	16	1104.23	44.94	0.38	0.03	20.21	0.6
1523B-45-ol109	93.79	0.000694842	49.57	0.0686862	0.18	0.00470727	6.08	0.0201257	1.09	9.724	0.0484068	0.043	0.00378994	26.93	0.0832698	4.96	0.0119004	0.1	0.00668095	0.642	0.0141509	0.023	0.000958876	0.1004	0.00132294	0.015	0.00201388	0.014	0.000848761	99.47	100.12	0.127778	3.56667	0.557778	0.92963	3.61111	1461	1300	50 × 30	0.65	0.09
1523B-45-ol110-i1	93.44	0.0202962	49.63	0.070066	0.215	0.00517422	6.92	0.0222935	1.08	9.828	0.04666	0.051	0.00402443	25.53	0.0822477	5.54	0.013151	0.091	0.00709597	0.758	0.0159933	0.029	0.00105827	0.1289	0.00153496	0.016	0.00222855	0.013	0.000988217	99.83	100.15	0.134884	3.52558	0.599535	0.999225	1.48837	1458	1300	37 × 30	0.32	0.04
1523B-45-ol111	93.7	0.00510396	49.57	0.069328	0.184	0.00505025	6.11	0.0211059	1.04	9.771	0.0472638	0.052	0.0040263	26.66	0.0775989	4.99	0.0124961	0.092	0.00716491	0.669	0.0149863	0.02	0.00103654	0.051	0.00110831	0.015	0.00231187	0.014	0.000913462	99.23	100.07	0.108696	3.63587	0.277174	0.461957	4.56522	1452	1300	45 × 36	0.84	0.12	38	11	1065.73	55.84	0.38	0.04	19.39	0.63
1523B-45-ol113	93.57	0.0311541	49.72	0.0688941	0.184	0.00491798	6.1	0.0206614	1.04	9.865	0.0435398	0.061	0.0039744	26.39	0.0812601	5.12	0.0122183	0.07	0.00680411	0.643	0.0144952	0.025	0.00101223	0.1141	0.00143912	0.015	0.00221484	0.017	0.000922284	99.37	100.13	0.13587	3.49457	0.620109	1.03351	4.13043	1450	1300	115 × 92	0.76	0.11	20	36	1079.1	28.92	0.56	0.03	21.58	0.41
1523B-45-ol114	93.67	0.011711	49.78	0.0689772	0.186	0.00469221	6.07	0.0200926	1.05	9.756	0.0471892	0.047	0.00379374	26.59	0.0825597	5.04	0.0120274	0.085	0.00666572	0.643	0.0141401	0.02	0.000965103	0.0737	0.00119711	0.012	0.00198258	0.015	0.000876074	99.37	100.09	0.107527	3.45699	0.396237	0.660394	3.87097	1454	1300	125 × 71	0.72	0.1	20	11	1066.85	59.96	0.43	0.06	20.04	0.93
1523B-45-ol115	93.51	0.0257568	49.7	0.0688663	0.189	0.00493476	6.12	0.0207292	1.01	9.897	0.0462205	0.053	0.00394251	26.27	0.0798795	5.04	0.0122214	0.108	0.00692921	0.662	0.0147022	0.027	0.00102351	0.1219	0.00148111	0.015	0.00223056	0.016	0.000901054	99.22	100.14	0.142857	3.50265	0.644974	1.07496	4.86772	1445	1300	51 × 51	0.92	0.13	38	12	1090.2	40.88	0.56	0.05	21.91	0.74
1523B-45-ol116	93.45	0.00530983	49.87	0.0691019	0.195	0.00499727	6.23	0.0209422	1.02	9.886	0.0474375	0.052	0.00396069	25.99	0.0806967	5.21	0.0125002	0.085	0.00711499	0.674	0.0148912	0.019	0.000985071	0.0368	0.000997931	0.019	0.00216003	0.011	0.000868799	99.3	100.05	0.0974359	3.45641	0.188718	0.31453	3.84615	1446	1300	50 × 45	0.75	0.11
1523B-45-ol117	93.58	0.0135849	49.75	0.0689356	0.191	0.00484994	6.04	0.0203035	1.04	9.864	0.0470785	0.053	0.00391648	26.46	0.0814757	5.03	0.0121971	0.089	0.00680089	0.66	0.0145827	0.028	0.00102241	0.1488	0.00156548	0.015	0.00239381	0.016	0.00089214	99.39	100.17	0.146597	3.4555	0.779058	1.29843	4.08377	1451	1300	57 × 47	0.78	0.11	20	15	1099.07	45.94	0.6	0.05	22.36	0.81
1523B-45-ol118	93.49	0.00570963	49.68	0.0688386	0.194	0.00491372	6.35	0.0209382	1.02	9.883	0.0471692	0.047	0.00385281	26.08	0.0809762	5.16	0.0123137	0.103	0.00693801	0.697	0.0149343	0.02	0.000955405	0.0549	0.00109107	0.017	0.00215687	0.013	0.000923825	99.32	100.07	0.103093	3.59278	0.28299	0.471649	3.86598	1448	1300	46 × 34	0.75	0.1	38	11	1108.82	42.58	0.36	0.04	20.02	0.63
1523B-45-ol119	93.56	0.00596681	49.7	0.0688663	0.189	0.00483572	6.17	0.0205822	1.05	9.86	0.0469333	0.052	0.00389125	26.3	0.0819995	5.2	0.0123428	0.102	0.00688951	0.652	0.0144969	0.022	0.000963337	0.1054	0.00136863	0.015	0.00214657	0.015	0.000893948	99.42	100.12	0.116402	3.44974	0.557672	0.929453	3.7037	1451	1300	37 × 32	0.7	0.1
1523B-45-ol120	93.51	0.0101181	49.76	0.0689495	0.198	0.0049029	6.45	0.020937	1.07	9.844	0.0476149	0.048	0.00386432	26	0.0820607	5.32	0.0124908	0.078	0.00670388	0.701	0.0149031	0.02	0.000955101	0.0555	0.00109462	0.014	0.00217136	0.016	0.00089263	99.57	100.07	0.10101	3.5404	0.280303	0.467172	2.52525	1454	1300	50 × 38	0.5	0.07	38	13	1158.4	47.15	0.39	0.03	21.77	0.62
1523B-45-ol121	93.68	0.00918982	49.86	0.069088	0.187	0.00483673	6.02	0.0203135	1.06	9.748	0.0446489	0.054	0.0038831	26.63	0.0830241	5.06	0.0121404	0.052	0.00663812	0.614	0.0141255	0.021	0.000962521	0.0754	0.0012044	0.017	0.00211026	0.016	0.000894629	99.41	100.09	0.112299	3.28342	0.403209	0.672014	3.63636	1455	1300	99 × 94	0.68	0.09	20	33	1095.54	31.22	0.43	0.02	20.11	0.47
1523B-45-ol122	93.65	0.00555087	49.59	0.0687139	0.194	0.00486685	6.12	0.0205724	1.02	9.786	0.0449488	0.055	0.00396444	26.48	0.080518	5.05	0.0122456	0.104	0.00694473	0.663	0.0146482	0.03	0.00103569	0.1738	0.00170585	0.014	0.00212392	0.015	0.000889128	99.3	100.19	0.154639	3.41753	0.895876	1.49313	4.58763	1449	1300	52 × 52	0.89	0.12	20	14	1121.42	37.9	0.59	0.04	22.34	0.61
1523B-45-ol123	93.56	0.0171378	49.86	0.069088	0.182	0.0048409	6.03	0.0204243	1.05	9.861	0.0463051	0.051	0.0039112	26.42	0.0820318	5.05	0.0122456	0.076	0.00673476	0.648	0.0144926	0.019	0.000957001	0.05	0.00105883	0.015	0.00216011	0.018	0.000931887	99.32	100.06	0.104396	3.56044	0.274725	0.457875	4.06593	1451	1300	78 × 66	0.74	0.1	20	21	1068.9	30.04	0.38	0.02	19.77	0.39
1523B-45-ol124	93.65	0.013167	49.71	0.0688802	0.189	0.0048288	6.22	0.0205891	1.04	9.763	0.0480996	0.046	0.00380167	26.49	0.081568	5.06	0.0120751	0.091	0.0067002	0.654	0.0143821	0.026	0.00100353	0.1311	0.00150204	0.014	0.00201098	0.014	0.000878622	99.44	100.15	0.137566	3.46032	0.693651	1.15608	3.75661	1453	1300	41 × 41	0.71	0.1
1523B-45-ol125	93.66	0.0145662	49.67	0.0688248	0.191	0.00493375	6.13	0.0207631	1.05	9.76	0.0454552	0.052	0.00399055	26.47	0.0815065	5.13	0.0124396	0.097	0.00705611	0.673	0.0148694	0.03	0.00105118	0.1573	0.00162261	0.015	0.00209708	0.018	0.000940229	99.43	100.17	0.157068	3.52356	0.82356	1.3726	3.87435	1453	1300	66 × 66	0.74	0.1	20	13	1109.97	36.96	0.6	0.04	23.07	0.59
1523B-45-ol126	93.53	0.01366	49.74	0.0689218	0.188	0.00487977	6.21	0.020795	1.03	9.871	0.0477455	0.048	0.00386098	26.2	0.0810126	5.16	0.0123137	0.084	0.00684945	0.683	0.0148187	0.021	0.00099325	0.0616	0.0011389	0.016	0.00219038	0.014	0.00087146	99.33	100.08	0.111702	3.63298	0.32766	0.546099	3.98936	1449	1300	52 × 43	0.75	0.1	38	13	1125.86	49.88	0.42	0.04	20.33	0.63
1523B-45-ol127	93.67	0.0150379	49.67	0.0688248	0.188	0.00480267	6.17	0.020503	1.05	9.761	0.0463368	0.05	0.00393038	26.5	0.0815988	5.11	0.0121944	0.083	0.00691083	0.662	0.0145617	0.022	0.000965202	0.0701	0.00119189	0.016	0.00211647	0.013	0.000894056	99.36	100.09	0.117021	3.52128	0.372872	0.621454	3.88298	1453	1300	78 × 53	0.73	0.1	20	8	1084.5	50.54	0.45	0.05	20.37	0.85
1523B-45-ol128	93.62	0.00539705	49.75	0.0689356	0.187	0.00477125	6.2	0.0203641	1.03	9.779	0.0473005	0.046	0.00382529	26.42	0.081015	5.04	0.011963	0.098	0.00669294	0.662	0.0143967	0.02	0.000973301	0.0531	0.0010814	0.016	0.00215838	0.01	0.000843981	99.29	100.07	0.106952	3.54011	0.283957	0.473262	4.17112	1450	1300	44 × 37	0.78	0.11
1523B-45-ol129	93.45	0.0318502	49.67	0.0701051	0.194	0.00503808	6.01	0.0208193	0.97	9.93	0.0456103	0.053	0.00408892	26.13	0.0787847	5.07	0.0124892	0.121	0.00731668	0.64	0.0147895	0.032	0.00107577	0.1947	0.00179856	0.019	0.00228668	0.013	0.000921157	99.04	100.21	0.164948	3.29897	1.00361	1.67268	6.03093	1437	1300	42 × 33	1.17	0.16	38	11	1146.39	48.61	0.63	0.05	23.24	0.69
1523B-45-ol130	93.3	0.0121562	49.92	0.0691712	0.188	0.00489692	6.22	0.0208294	0.98	10.016	0.047033	0.053	0.00403216	25.82	0.0795091	5.08	0.0122535	0.108	0.00688551	0.672	0.0149254	0.02	0.000968163	0.0682	0.00119705	0.017	0.00217288	0.015	0.000882217	99.17	100.08	0.106383	3.57447	0.362766	0.60461	4.84043	1438	1300	39 × 39	0.91	0.13
1523B-45-ol131	93.41	0.00836969	49.81	0.0690188	0.199	0.00501523	6.29	0.0209825	1	9.899	0.0473729	0.049	0.0039057	25.83	0.08053	5.32	0.0126277	0.102	0.00709358	0.66	0.0146752	0.024	0.00101336	0.0907	0.00133593	0.018	0.00218015	0.017	0.000950161	99.32	100.11	0.120603	3.31658	0.455779	0.759631	3.96985	1442	1300	49 × 40	0.79	0.11	38	9	1129.71	47.33	0.53	0.05	21.92	0.69
1523B-45-ol132	93.32	0.00713639	50.08	0.0693929	0.19	0.00487316	6.19	0.020728	1.01	9.989	0.0463939	0.054	0.00392486	25.77	0.079351	5.21	0.012433	0.1	0.00706604	0.654	0.0145855	0.02	0.00100112	0.0463	0.00106994	0.018	0.00222592	0.02	0.000953777	99.35	100.07	0.105263	3.44211	0.243684	0.40614	3.78947	1442	1300	73 × 50	0.72	0.07	20	19	1103.77	35.43	0.35	0.03	19.6	0.57
1523B-45-ol133	93.71	0.00999722	49.67	0.0688248	0.184	0.00477122	6.1	0.0201919	1.06	9.751	0.0469145	0.049	0.00378379	26.7	0.0822147	5.04	0.0120274	0.069	0.00640362	0.628	0.0140203	0.017	0.000928108	0.0409	0.000991359	0.016	0.00200628	0.012	0.000855631	99.33	100.05	0.0923913	3.41304	0.222283	0.370471	3.91304	1455	1300	62 × 62	0.72	0.1	20	13	1109.41	39.94	0.33	0.03	19.61	0.51
1523B-45-ol134	93.73	0.00527917	49.48	0.0685615	0.184	0.00476243	6.13	0.0202912	1.04	9.766	0.0466108	0.05	0.00379026	26.75	0.0820269	5	0.0119319	0.095	0.0066912	0.643	0.0142061	0.021	0.00095314	0.0857	0.00126228	0.017	0.00210247	0.01	0.000843511	99.27	100.1	0.11413	3.49457	0.465761	0.776268	4.51087	1454	1300	50 × 31	0.83	0.12
1523B-45-ol135-i1	93.38	0.0121865	49.96	0.0847849	0.191	0.00604253	6.19	0.0253865	0.99	9.91	0.0583952	0.048	0.00482604	25.85	0.098705	5.23	0.0152858	0.096	0.00859851	0.65	0.0179122	0.019	0.00120206	0.0497	0.00130754	0.018	0.0027709	0.014	0.00113217	99.21	100.07	0.0994764	3.40314	0.260209	0.433682	4.50262	1440	1300	43 × 35	0.86	0.12	38	12	1122.62	44.57	0.37	0.03	20.38	0.74
1523B-45-ol135-i2	93.38	0.0121865	50	0.0848528	0.191	0.00609197	6.25	0.0256326	1.02	9.89	0.0573449	0.048	0.0048561	25.85	0.0980976	5.23	0.0154095	0.111	0.00873994	0.669	0.0182445	0.02	0.00123934	0.0609	0.00139382	0.016	0.00253622	0.011	0.00108979	99.36	100.07	0.104712	3.50262	0.318848	0.531414	3.71728	1444	1300	30 × 30	0.71	0.07
1523B-45-ol135-i3	93.38	0.0121865	50.07	0.0849716	0.187	0.00613991	6.22	0.0259498	1.01	9.89	0.0564125	0.054	0.00499747	25.93	0.0971789	5.13	0.0154772	0.11	0.00882831	0.65	0.0182316	0.018	0.00121137	0.0473	0.00132339	0.017	0.00264216	0.018	0.00114343	99.34	100.06	0.0962567	3.47594	0.252941	0.421569	3.85027	1444	1300	25 × 25	0.72	0.07
1523B-45-ol136	93.59	0.00774118	49.81	0.0709877	0.189	0.00492069	6.17	0.0213132	1.02	9.782	0.0466872	0.05	0.00390795	26.32	0.0845564	5.06	0.0122053	0.101	0.00714246	0.678	0.0155682	0.019	0.000983968	0.0527	0.00108321	0.016	0.00220832	0.017	0.000848563	99.29	100.07	0.100529	3.5873	0.278836	0.464727	4.12698	1449	1300	46 × 46	0.78	0.11	38	16	1084.85	43.07	0.34	0.03	19.81	0.55
1523B-45-ol137	93.78	0.00911339	49.46	0.0685338	0.19	0.00475117	6.07	0.020015	1.07	9.739	0.0473589	0.044	0.00368504	26.85	0.0837143	5.1	0.0119753	0.081	0.0064027	0.64	0.0140428	0.023	0.000959749	0.0884	0.00126925	0.015	0.00206739	0.014	0.000893054	99.37	100.11	0.121053	3.36842	0.465263	0.775439	3.89474	1458	1300	48 × 41	0.74	0.1	38	12	1078.81	45.31	0.42	0.04	21.14	0.77
1523B-45-ol138	93.73	0.00516198	49.47	0.0685476	0.184	0.0047859	6.1	0.0201919	1.04	9.769	0.0467518	0.047	0.00374786	26.75	0.0816837	5.02	0.0119796	0.086	0.00659304	0.637	0.0141552	0.019	0.000940851	0.0656	0.00115488	0.015	0.0020599	0.008	0.000803618	99.2	100.07	0.103261	3.46196	0.356522	0.594203	4.72826	1453	1300	42 × 32	0.87	0.12
1523B-45-ol139	93.69	0.0115472	49.74	0.0689218	0.181	0.00472821	6.03	0.0201152	1.05	9.757	0.04782	0.046	0.00384453	26.64	0.0827149	5.06	0.0120751	0.086	0.00673697	0.622	0.0140376	0.019	0.000947523	0.0525	0.00105618	0.017	0.00203147	0.011	0.000860059	99.31	100.07	0.104972	3.43646	0.290055	0.483425	4.1989	1453	1300	60 × 41	0.76	0.11	20	16	1100.88	41.06	0.38	0.04	20.18	0.67
1523B-45-ol140	93.63	0.00943095	49.72	0.0688941	0.197	0.00494146	6.12	0.0204936	1.03	9.771	0.0465096	0.053	0.00401465	26.39	0.0822759	5.12	0.0122843	0.101	0.00700925	0.668	0.0147164	0.03	0.00102704	0.1721	0.00168034	0.016	0.00206452	0.017	0.00094053	99.42	100.19	0.152284	3.39086	0.873604	1.45601	3.90863	1451	1300	54 × 45	0.77	0.11	20	18	1127.88	46.13	0.56	0.04	22.96	0.7
1523B-45-ol141	93.67	0.011111	49.52	0.0686169	0.187	0.00479423	5.95	0.0200019	1	9.803	0.0457816	0.052	0.00379115	26.67	0.0814394	4.95	0.0120031	0.103	0.00683112	0.629	0.0141922	0.027	0.00100332	0.1561	0.0016084	0.017	0.00211355	0.01	0.000869693	99.08	100.17	0.144385	3.36364	0.834759	1.39127	5.82888	1446	1300	37 × 37	1.09	0.15
1523B-45-ol143	93.39	0.00917071	49.63	0.0706796	0.192	0.00514104	6.04	0.0210784	0.95	9.945	0.045934	0.056	0.00414376	25.88	0.0810274	5.32	0.0129003	0.119	0.00740671	0.607	0.0143928	0.022	0.00104975	0.0971	0.00139313	0.018	0.00227273	0.013	0.000919782	98.88	100.11	0.114583	3.16146	0.505729	0.842882	6.40625	1433	1300	33 × 33	1.23	0.17
1523B-45-ol145-i1	93.49	0.00938727	49.88	0.0691158	0.189	0.00491535	6.12	0.0204936	1.02	9.884	0.0469207	0.053	0.00390017	26.18	0.0806135	5.1	0.0121705	0.081	0.00671005	0.657	0.0144495	0.023	0.000989504	0.0735	0.0012184	0.019	0.00218789	0.015	0.000910744	99.29	100.09	0.121693	3.47619	0.388889	0.648148	4.2328	1446	1300	71 × 48	0.8	0.11	20	17	1094.66	35.58	0.43	0.03	20.72	0.54
1523B-45-ol145-i2	93.49	0.00938727	49.86	0.119664	0.191	0.00846767	6.21	0.035604	1.04	9.868	0.0835491	0.048	0.0065984	26.18	0.139627	5.13	0.021204	0.108	0.0117216	0.646	0.0248925	0.023	0.00172347	0.0739	0.00210861	0.019	0.00367207	0.018	0.0016212	99.41	100.09	0.120419	3.3822	0.386911	0.644852	3.56021	1449	1300	25 × 25	0.68	0.07
1523B-45-ol146	93.36	0.0125191	49.84	0.0690603	0.195	0.00504168	6.35	0.0211012	0.98	9.922	0.045064	0.06	0.00409122	25.73	0.0792279	5.25	0.0125285	0.086	0.00687426	0.67	0.0148461	0.022	0.000996113	0.0891	0.00132838	0.017	0.00221835	0.019	0.000930762	99.23	100.11	0.112821	3.4359	0.456923	0.761538	4.51282	1439	1300	87 × 72	0.88	0.12	20	20	1150.35	36.35	0.47	0.03	21.9	0.53
1523B-45-ol157	93.82	0.00495212	49.64	0.0687832	0.182	0.00458879	5.91	0.0195629	1.1	9.717	0.047499	0.047	0.00377897	27.1	0.0837955	4.9	0.0116933	0.072	0.00650042	0.634	0.0139179	0.019	0.000948555	0.0483	0.00103117	0.014	0.002076	0.011	0.000814447	99.39	100.06	0.104396	3.48352	0.265385	0.442308	3.68132	1462	1300		0.67	0.09
1523B-47-ol1	93.41	0.0115053	50.2	0.0714914	0.186	0.00511891	6.1	0.0217574	1.04	9.87	0.0431819	0.056	0.00398105	25.96	0.0812697	5.19	0.0127848	0.106	0.00709165	0.627	0.015389	0.019	0.000962357	0.0646	0.00122914	0.015	0.00228241	0.015	0.00088885	99.45	100.08	0.102151	3.37097	0.347312	0.578853	3.3871	1447	1310	112 × 50	0.63	0.18	38	20	1093.97	32.49	0.42	0.02	20.11	0.34
1523B-47-ol10	93.46	0.0391631	50.17	0.0714486	0.186	0.00512689	6.04	0.0213881	1.05	9.853	0.0439921	0.055	0.00385508	26.09	0.0823448	5.17	0.0126696	0.108	0.0071061	0.642	0.0154772	0.02	0.000986301	0.0736	0.00127108	0.016	0.00229159	0.017	0.000893936	99.49	100.09	0.107527	3.45161	0.395699	0.659498	3.22581	1450	1310	75 × 65	0.6	0.1	38	28	1109.77	40.62	0.43	0.03	20.49	0.45
1523B-47-ol11	93.53	0.00366645	50.1	0.0713489	0.181	0.00499363	5.98	0.0211757	1.07	9.843	0.0448318	0.047	0.00378521	26.36	0.0831969	5.07	0.0124245	0.091	0.00679004	0.63	0.0151153	0.017	0.000909625	0.0409	0.00105805	0.015	0.00219566	0.012	0.00084033	99.45	100.06	0.0939227	3.48066	0.225967	0.376611	3.37017	1453	1310	64 × 58	0.61	0.12	38	19	1052.16	37.88	0.38	0.03	19.04	0.48
1523B-47-ol12	93.46	0.00339679	49.93	0.0730287	0.192	0.00517843	6.08	0.0215298	1.03	9.873	0.0438284	0.052	0.00393313	26.02	0.0831254	5.32	0.0128324	0.123	0.00717442	0.631	0.015286	0.017	0.000947275	0.0398	0.00105254	0.02	0.00230664	0.013	0.000882636	99.35	100.06	0.0885417	3.28646	0.207292	0.345486	3.69792	1446	1310	43 × 38	0.71	0.14	38	15	1121.9	39.38	0.36	0.03	19.97	0.5
1523B-47-ol13	93.67	0.00306141	49.84	0.0709787	0.183	0.00497407	5.91	0.0208522	1.07	9.741	0.0442419	0.049	0.0037375	26.54	0.0851285	5.23	0.0124808	0.124	0.00686964	0.604	0.0146492	0.016	0.000933772	0.0533	0.00111888	0.017	0.00235407	0.013	0.000875341	99.39	100.07	0.0874317	3.30055	0.291257	0.485428	3.71585	1454	1310	48 × 40	0.68	0.11	38	11	1123.47	48.87	0.37	0.03	20.13	0.55
1523B-47-ol14	93.69	0.0335367	49.92	0.0710926	0.177	0.00494404	5.94	0.021034	1.07	9.738	0.0444785	0.05	0.00378249	26.7	0.0835863	5.02	0.0122376	0.097	0.00682547	0.62	0.0150265	0.017	0.000929771	0.0475	0.00108605	0.016	0.00236226	0.008	0.000792766	99.41	100.06	0.0960452	3.50282	0.268362	0.447269	3.67232	1457	1310	52 × 44	0.65	0.02	38	21	1052.05	38.93	0.34	0.02	19	0.43
1523B-47-ol15-i1	93.53	0.0301239	50.06	0.071292	0.188	0.00505816	6.04	0.0213881	1.08	9.833	0.0445339	0.048	0.00381936	26.28	0.0829444	5.14	0.0124638	0.103	0.0069312	0.648	0.0153831	0.021	0.000946815	0.0657	0.00122061	0.016	0.0022369	0.015	0.000882295	99.53	100.08	0.111702	3.44681	0.349468	0.582447	2.92553	1455	1310	62 × 58	0.55	0.01	38	12	1069.93	42.58	0.44	0.03	19.67	0.53
1523B-47-ol15-i2	93.53	0.0301239	50.06	0.071292	0.188	0.00505816	6.04	0.0213881	1.08	9.833	0.0445339	0.048	0.00381936	26.28	0.0829444	5.14	0.0124638	0.103	0.0069312	0.648	0.0153831	0.021	0.000946815	0.0657	0.00122061	0.016	0.0022369	0.015	0.000882295	99.53	100.08	0.111702	3.44681	0.349468	0.582447	2.92553	1455	1310		0.55	0.01	38	17	1082.46	40.38	0.43	0.02	19.94	0.51
1523B-47-ol16	93.63	0.0110458	49.88	0.0710356	0.189	0.00509955	6.02	0.0208539	1.06	9.751	0.0487911	0.054	0.00446416	26.39	0.0832916	5.25	0.0126636	0.108	0.00903444	0.615	0.0144238	0.022	0.000971933	0.0569	0.000827874	0.014	0.00198357	0.016	0.00113413	99.42	100.08	0.116402	3.25397	0.301058	0.501764	3.49206	1453	1310	48 × 40	0.66	0.08	38	17	1120.94	33.4	0.43	0.02	20.4	0.38
1523B-47-ol17	93.87	0.0126018	49.78	0.0708932	0.178	0.00486008	5.83	0.0206445	1.09	9.619	0.0444283	0.047	0.00363804	27.1	0.0848386	4.92	0.0120569	0.095	0.00661867	0.636	0.0149166	0.016	0.00090218	0.0445	0.00105171	0.015	0.00219101	0.007	0.000791423	99.39	100.06	0.0898876	3.57303	0.25	0.416667	3.76404	1462	1310	62 × 48	0.67	0.05	38	19	1038.18	38.21	0.34	0.02	18.69	0.46
1523B-47-ol18	93.7	0.0225754	49.91	0.0710784	0.182	0.00496451	5.95	0.0210694	1.08	9.734	0.0442101	0.049	0.00376254	26.71	0.0836176	5.01	0.0123414	0.068	0.00675919	0.63	0.0150587	0.02	0.000916807	0.0614	0.00117062	0.016	0.00226023	0.011	0.000839062	99.43	100.07	0.10989	3.46154	0.337363	0.562271	3.51648	1457	1310	103 × 70	0.64	0.02	38	9	1038.74	37.91	0.41	0.03	19.8	0.48
1523B-47-ol19	93.75	0.0158404	49.85	0.0709929	0.177	0.00493746	5.89	0.020857	1.1	9.715	0.0433759	0.051	0.00374166	26.85	0.0844004	5.03	0.0121971	0.087	0.00669512	0.616	0.014906	0.019	0.000932252	0.0748	0.00124865	0.014	0.00233406	0.01	0.000810321	99.48	100.08	0.107345	3.48023	0.422599	0.704331	3.38983	1460	1310	71 × 60	0.6	0.06	38	16	1056.99	39.21	0.41	0.03	20.16	0.48
1523B-47-ol2	93.34	0.0249214	50.17	0.0898714	0.192	0.00639914	6.12	0.0266866	1.02	9.885	0.0533556	0.056	0.00485522	25.6	0.100769	5.48	0.0161461	0.103	0.00876092	0.656	0.019236	0.019	0.00116555	0.0712	0.00156408	0.015	0.00286048	0.013	0.0010958	99.39	100.08	0.0989583	3.41667	0.370833	0.618056	3.59375	1442	1310	64 × 57	0.69	0.03	38	20	1147.8	42.01	0.45	0.03	21.5	0.53
1523B-47-ol2	93.76	0.00394449	49.71	0.0707935	0.18	0.00492847	5.82	0.0207587	1.07	9.74	0.0437378	0.048	0.0037288	26.95	0.0840218	4.94	0.012169	0.12	0.00684487	0.614	0.0149284	0.017	0.000917196	0.0582	0.00115149	0.017	0.002208	0.01	0.000816662	99.29	100.07	0.0944444	3.41111	0.323333	0.538889	4.33333	1456	1310		0.78	0.08	38	10	1032.79	42.65	0.32	0.03	18.92	0.59
1523B-47-ol20	93.5	0.00893905	50.02	0.071235	0.183	0.00509282	5.99	0.0214416	1.03	9.872	0.0444569	0.049	0.00384388	26.3	0.0819953	5.01	0.0125343	0.105	0.00703455	0.643	0.015485	0.021	0.000972398	0.0749	0.00128386	0.016	0.00228351	0.014	0.00087774	99.33	100.09	0.114754	3.51366	0.40929	0.682149	4.15301	1448	1310	48 × 43	0.76	0.04	38	6	1079.32	46.73	0.44	0.04	19.69	0.6
1523B-47-ol21	93.69	0.0106764	49.59	0.0725314	0.191	0.00519526	6.17	0.0219279	1.06	9.748	0.0408969	0.062	0.00404053	26.48	0.0835757	5.26	0.0127548	0.084	0.00704872	0.646	0.0156817	0.029	0.00104189	0.1586	0.00171131	0.014	0.00236442	0.026	0.00101429	99.52	100.19	0.151832	3.3822	0.830366	1.38394	3.50785	1455	1310	135 × 93	0.67	0.02	38	34	1087.76	32.74	0.67	0.02	22.82	0.39
1523B-47-ol22	93.77	0.0156185	49.7	0.0707793	0.182	0.00493147	5.82	0.0207587	1.06	9.745	0.043885	0.051	0.00370701	27.02	0.0832	4.86	0.012097	0.093	0.0067	0.626	0.014948	0.021	0.000947492	0.0967	0.00136722	0.016	0.00251858	0.007	0.000800282	99.29	100.11	0.115385	3.43956	0.531319	0.885531	4.50549	1457	1310	42 × 42	0.82	0.07	38	6	1054.63	45.14	0.45	0.03	19.82	0.63
1523B-47-ol23	93.71	0.00918803	49.95	0.0711353	0.176	0.00492548	5.88	0.0208216	1.08	9.726	0.0437994	0.054	0.00371319	26.77	0.084491	4.99	0.0122922	0.089	0.00673191	0.615	0.0148973	0.018	0.000935993	0.0565	0.00113824	0.015	0.00229476	0.01	0.000795752	99.44	100.07	0.102273	3.49432	0.321023	0.535038	3.57955	1458	1310	72 × 65	0.63	0.04	38	16	1041	39.97	0.37	0.03	18.91	0.47
1523B-47-ol24	93.84	0.00991742	49.65	0.0726191	0.183	0.00500617	5.93	0.0209986	1.06	9.649	0.0433292	0.053	0.00382623	27.02	0.0832	4.9	0.0120705	0.11	0.00684777	0.629	0.0150852	0.023	0.000952857	0.1338	0.00156217	0.015	0.00234263	0.013	0.000864044	99.35	100.14	0.125683	3.43716	0.731148	1.21858	4.31694	1457	1310	46 × 43	0.79	0.04	38	7	1069.07	45.01	0.46	0.05	20.02	0.65
1523B-47-ol25	93.65	0.0217872	49.99	0.0711923	0.182	0.00498347	5.93	0.0209986	1.06	9.75	0.0442828	0.049	0.00378529	26.58	0.0828682	4.97	0.0122429	0.1	0.00681371	0.649	0.015313	0.027	0.000975021	0.0697	0.00122434	0.019	0.0022812	0.012	0.00087263	99.38	100.08	0.148352	3.56593	0.382967	0.638278	3.84615	1454	1310	62 × 55	0.7	0.11	38	10	1061.46	48.08	0.67	0.03	20.28	0.53
1523B-47-ol26	93.69	0.0082848	49.9	0.0710641	0.176	0.00494523	5.87	0.0208617	1.07	9.74	0.043363	0.051	0.00375596	26.67	0.0834924	5.07	0.0122941	0.09	0.00678724	0.632	0.0151874	0.019	0.000941712	0.0648	0.0011983	0.014	0.00237506	0.011	0.000824631	99.37	100.07	0.107955	3.59091	0.368182	0.613636	3.97727	1455	1310	67 × 59	0.7	0.05	38	20	1072.42	40.75	0.42	0.02	20.02	0.47
1523B-47-ol27	93.74	0.0117582	49.66	0.0707223	0.186	0.00500927	5.93	0.0209986	1.07	9.744	0.0428807	0.052	0.00381913	26.81	0.0835853	5.02	0.0123661	0.1	0.00688676	0.636	0.0152592	0.027	0.000967985	0.1279	0.0015343	0.022	0.00240084	0.011	0.00084793	99.39	100.14	0.145161	3.41935	0.687634	1.14606	4.03226	1456	1310	57 × 51	0.75	0.02	38	19	1083.13	40.18	0.65	0.03	22.09	0.51
1523B-47-ol28	93.76	0.00394449	49.71	0.0707935	0.18	0.00492847	5.82	0.0207587	1.07	9.74	0.0437378	0.048	0.0037288	26.95	0.0840218	4.94	0.012169	0.12	0.00684487	0.614	0.0149284	0.017	0.000917196	0.0582	0.00115149	0.017	0.002208	0.01	0.000816662	99.29	100.07	0.0944444	3.41111	0.323333	0.538889	4.33333	1456	1310	56 × 51	0.78	0.08	38	19	1064.59	40.67	0.41	0.03	19.58	0.5
1523B-47-ol3	93.76	0.00681535	49.68	0.0707508	0.177	0.00493753	5.89	0.020857	1.07	9.741	0.0443672	0.05	0.00379126	26.93	0.0839594	4.97	0.0122429	0.11	0.00689845	0.603	0.0147798	0.02	0.000934205	0.0994	0.00139014	0.015	0.00228125	0.015	0.000880178	99.37	100.11	0.112994	3.40678	0.561582	0.93597	4.18079	1457	1310	53 × 39	0.74	0.02	38	13	1054.19	39.74	0.46	0.03	20.17	0.56
1523B-47-ol4	93.68	0.0261666	49.94	0.0711211	0.181	0.00497966	5.93	0.0209986	1.07	9.737	0.0430994	0.056	0.00384154	26.64	0.0830553	5.03	0.0123907	0.097	0.00678802	0.643	0.0152133	0.021	0.00093484	0.0854	0.00132036	0.015	0.00246972	0.012	0.000831334	99.45	100.09	0.116022	3.55249	0.471823	0.786372	3.53591	1456	1310	66 × 66	0.64	0.08	38	21	1050.09	38.96	0.46	0.03	20.2	0.46
1523B-47-ol5	93.67	0.00443973	49.94	0.0711211	0.193	0.00505551	6.28	0.0215128	1.13	9.683	0.0424877	0.054	0.00379527	26.33	0.0851291	5.25	0.0125285	0.088	0.00689036	0.69	0.0157676	0.021	0.000932474	0.0631	0.00119185	0.017	0.00230615	0.003	0.000690967	99.75	100.07	0.108808	3.57513	0.326943	0.544905	1.65803	1466	1310	72 × 55	0.32	0.05	38	10	1111.32	49.12	0.41	0.04	20.7	0.69
1523B-47-ol6	93.59	0.0295391	49.77	0.070879	0.186	0.00507798	6.01	0.0212819	1.06	9.851	0.0438571	0.051	0.00381074	26.47	0.0825253	5.07	0.0124892	0.104	0.00696953	0.656	0.0154032	0.033	0.00102758	0.2053	0.00187279	0.018	0.00228499	0.008	0.000820693	99.49	100.22	0.177419	3.52688	1.10376	1.83961	3.92473	1453	1310	48 × 48	0.73	0.03	38	11	1139.8	44	0.73	0.04	24.23	0.62
1523B-47-ol7	93.55	0.00201108	49.99	0.0711923	0.183	0.00503001	5.97	0.0211403	1.06	9.844	0.0439519	0.056	0.00383033	26.39	0.0826158	5.04	0.0124153	0.116	0.00694771	0.658	0.0155421	0.019	0.000933162	0.0691	0.00123764	0.015	0.00223433	0.01	0.000825191	99.43	100.08	0.103825	3.59563	0.377596	0.629326	3.55191	1453	1310	67 × 55	0.65	0.04	38	6	1065.23	56.03	0.38	0.04	19.24	0.63
1523B-47-ol8	93.65	0.0153618	49.75	0.0721327	0.179	0.00503444	5.89	0.0211595	1.02	9.783	0.0425499	0.057	0.00389874	26.6	0.0815669	5	0.0123813	0.116	0.00711185	0.622	0.015271	0.025	0.000981505	0.1658	0.00172518	0.015	0.00229607	0.013	0.000865107	99.24	100.18	0.139665	3.47486	0.926257	1.54376	5.2514	1448	1310	45 × 45	0.94	0.11	38	13	1100.35	51.28	0.56	0.03	22.09	0.63
1523B-47-ol9	93.82	0.0105774	49.72	0.0708078	0.176	0.00483592	5.86	0.0206006	1.11	9.705	0.0428336	0.05	0.00364996	27.12	0.0845518	4.91	0.0120324	0.093	0.00664565	0.617	0.0147968	0.019	0.00088109	0.062	0.00116225	0.018	0.00234171	0.012	0.000854648	99.45	100.07	0.107955	3.50568	0.352273	0.587121	3.52273	1463	1310	100 × 79	0.62	0.02	38	9	1047.71	34.89	0.42	0.02	19.95	0.41
2217-48-ol10	93.55	0.0087511	49.93	0.163883	0.176	0.00954534	6.09	0.0247918	1.05	9.86	0.0654536	0.071	0.00744314	26.2	0.152722	5.09	0.0261846	0.154	0.00896563	0.667	0.0295328	0.031	0.00178998	0.1732	0.00227162	0.016	0.0027442	0.014	0.00161914	99.51	100.19	0.176136	3.78977	0.984091	1.64015	3.86364	1450	1350	95 × 81	0.68	0.03	38	25.014	1105.97	42.25	0.65	0.03	23.36	0.56
2217-48-ol100	93.68	0.0174541	49.84	0.110238	0.175	0.00531568	5.94	0.039468	1.08	9.731	0.0496168	0.059	0.00544023	26.69	0.234779	5.08	0.0353198	0.16	0.00805011	0.595	0.0173697	0.018	0.0016188	0.0614	0.00142752	0.013	0.00298146	0.008	0.000943621	99.45	100.07	0.102857	3.4	0.350857	0.584762	3.54286	1457	1350	50 × 49	0.62	0.03	38	16	1095.76	39.23	0.34	0.02	20.18	0.4
2217-48-ol17	93.38	0.0157838	50.1	0.141584	0.179	0.0088628	6.13	0.0414765	1.02	9.887	0.0590043	0.065	0.00497651	25.97	0.131608	5.08	0.0345485	0.184	0.0226685	0.638	0.0396877	0.02	0.00235845	0.0696	0.00219079	0.016	0.00339138	0.018	0.00137819	99.37	100.09	0.111732	3.56425	0.388827	0.648045	4.02235	1444	1350	60 × 51	0.72	0.02	38	19	1085.57	39.62	0.36	0.02	19.4	0.4
2217-48-ol18	93.6	0.0279824	50.05	0.180034	0.173	0.00589457	6.02	0.0310639	1.06	9.749	0.0610102	0.062	0.00921992	26.41	0.094889	5.06	0.0232869	0.164	0.0101842	0.62	0.0210247	0.017	0.00128811	0.0361	0.00145992	0.016	0.0030011	0.016	0.00114827	99.44	100.05	0.0982659	3.58382	0.208671	0.347784	3.52601	1453	1350	84 × 68	0.61	0.02	38	24	1088.47	34.72	0.34	0.02	19.28	0.4
2217-48-ol2	93.38	0.00930981	50.19	0.131636	0.173	0.00809436	6.16	0.0302698	1.03	9.877	0.0662528	0.065	0.00616805	25.98	0.0851424	5.08	0.017128	0.153	0.0106803	0.628	0.0169436	0.02	0.0014086	0.064	0.00153901	0.017	0.0030956	0.017	0.00129079	99.45	100.08	0.115607	3.63006	0.369942	0.61657	3.64162	1447	1350	93 × 71	0.63	0.06	38	14	1062.96	38.9	0.37	0.03	20.02	0.55
2217-48-ol21	93.54	0.00748366	50.06	0.103298	0.178	0.00557224	6.04	0.0424695	1.07	9.837	0.0958336	0.064	0.00658401	26.2	0.162625	5.19	0.0445788	0.182	0.010645	0.608	0.0171613	0.016	0.00135078	0.0308	0.00136681	0.012	0.00552799	0.018	0.00131907	99.51	100.05	0.0898876	3.41573	0.173034	0.28839	3.03371	1453	1350	69 × 63	0.54	0.06	38	25	1083.15	35.2	0.31	0.02	19.24	0.39
2217-48-ol24	93.41	0.0231986	50	0.0777546	0.178	0.00696788	6.05	0.0308428	1	9.908	0.0612699	0.067	0.00696612	26.03	0.144659	5.06	0.0408494	0.211	0.0102831	0.603	0.0194752	0.026	0.00154586	0.1101	0.00321877	0.016	0.00478397	0.018	0.00197012	99.27	100.13	0.146067	3.38764	0.618539	1.0309	4.83146	1441	1350	43 × 40	0.86	0.03	38	13	1085.53	39.62	0.52	0.03	21.82	0.44
2217-48-ol28	93.61	0.021975	49.88	0.0770351	0.18	0.0059742	6.08	0.0262034	1.04	9.767	0.0509178	0.063	0.00432787	26.37	0.176536	5.1	0.0199714	0.16	0.0141012	0.627	0.0306583	0.019	0.00210105	0.0587	0.00235485	0.017	0.00316082	0.019	0.00143387	99.37	100.08	0.105556	3.48333	0.326111	0.543519	3.94444	1450	1350	65 × 54	0.71	0.01	38	17	1092.16	41.39	0.36	0.02	19.71	0.38
2217-48-ol30	93.45	0.0151617	49.83	0.0767785	0.165	0.00907185	5.87	0.0444585	1.02	9.889	0.0432093	0.067	0.00729185	26.3	0.590104	5.16	0.0305114	0.19	0.0101306	0.565	0.026104	0.028	0.00118862	0.1845	0.00453384	0.018	0.00405651	0.017	0.00218806	99.31	100.21	0.169697	3.42424	1.11818	1.86364	5.45455	1444	1350	60 × 37	0.9	0.04	38	14	1086.31	44.21	0.61	0.03	22.53	0.49
2217-48-ol32	93.66	0.0174156	49.78	0.259713	0.175	0.011703	5.93	0.0572321	1.06	9.747	0.102591	0.062	0.00419998	26.75	0.736738	4.99	0.0397804	0.167	0.00764566	0.593	0.0221982	0.019	0.00150037	0.0742	0.00133198	0.013	0.00362926	0.011	0.00229824	99.37	100.08	0.108571	3.38857	0.424	0.706667	4.05714	1455	1350	56 × 50	0.71	0.05	38	14	1058.82	43.94	0.39	0.02	19.72	0.52
2217-48-ol33	93.54	0.0489909	49.98	0.105411	0.177	0.00586948	6.09	0.0296343	1.04	9.861	0.0504838	0.062	0.00530588	26.26	0.136759	5.02	0.0156352	0.163	0.00863786	0.643	0.0226883	0.025	0.0016342	0.1005	0.0026847	0.017	0.00284421	0.015	0.00243991	99.45	100.11	0.141243	3.63277	0.567797	0.946328	3.72881	1450	1350	86 × 62	0.66	0.02	38	15	1081.47	42.5	0.47	0.04	20.54	0.55
2217-48-ol34	93.73	0.00942097	49.76	0.145436	0.17	0.00644464	5.9	0.0265098	1.05	9.755	0.0450877	0.062	0.00480877	26.79	0.119862	4.9	0.0199337	0.176	0.00944594	0.613	0.0282767	0.022	0.00160344	0.1015	0.00162753	0.018	0.00380237	0.017	0.00238911	99.34	100.12	0.129412	3.60588	0.597059	0.995098	4.58824	1454	1350	57 × 46	0.78	0.01	38	16	1042.09	38.66	0.43	0.03	19.63	0.42
2217-48-ol35	93.68	0.00549705	49.88	0.0872642	0.178	0.00796814	5.9	0.0318784	1.08	9.736	0.0603223	0.061	0.00838868	26.74	0.107279	4.99	0.0337895	0.151	0.00921297	0.614	0.0235584	0.02	0.00145861	0.0618	0.00179775	0.014	0.00323889	0.01	0.00101967	99.42	100.07	0.11236	3.44944	0.347191	0.578652	3.65169	1457	1350	81 × 51	0.65	0.03	38	18	1056.43	30	0.37	0.02	19.64	0.37
2217-48-ol37	93.58	0.00883984	49.58	0.0908234	0.176	0.00567014	6.04	0.0287805	1.05	9.857	0.0927991	0.061	0.0047803	26.49	0.22982	5.1	0.0301722	0.212	0.0097975	0.633	0.0222988	0.03	0.00169243	0.17	0.00261026	0.018	0.00406857	0.015	0.00176142	99.43	100.19	0.170455	3.59659	0.965909	1.60985	4.31818	1452	1350	47 × 38	0.76	0.02	38	14	1102.18	42.87	0.67	0.03	23.05	0.57
2217-48-ol38	93.57	0.016309	49.78	0.0960842	0.174	0.00840678	6	0.0262108	1.07	9.835	0.0597829	0.06	0.00445892	26.51	0.112819	5.11	0.0181531	0.179	0.0139196	0.616	0.0219229	0.021	0.00190571	0.0874	0.00188486	0.014	0.00481068	0.017	0.00112587	99.48	100.11	0.12069	3.54023	0.502299	0.837165	3.62069	1455	1350	61 × 54	0.63	0.04	38	17	1078.96	41.65	0.39	0.02	19.99	0.42
2217-48-ol41	93.52	0.015521	50.03	0.113543	0.171	0.00675808	6.01	0.0260791	1.04	9.862	0.0622871	0.059	0.00544299	26.3	0.0890032	5.05	0.0187628	0.151	0.00897877	0.606	0.0240183	0.021	0.0022213	0.0689	0.00135081	0.015	0.00462258	0.016	0.00149572	99.4	100.09	0.122807	3.54386	0.402924	0.67154	4.03509	1449	1350	82 × 70	0.69	0.02	38	23	1076.8	38.98	0.39	0.02	20.21	0.42
2217-48-ol45	93.51	0.0132968	49.91	0.100293	0.178	0.00664926	6.06	0.0252362	1.05	9.859	0.066454	0.066	0.00475312	26.2	0.157832	5.14	0.0474542	0.204	0.0107426	0.64	0.0171432	0.018	0.00233779	0.0568	0.0014094	0.014	0.00285309	0.015	0.00103907	99.41	100.08	0.101124	3.59551	0.319101	0.531835	3.76404	1450	1350	53 × 44	0.67	0.01	38	19	1088.19	43.2	0.39	0.02	20	0.38
2217-48-ol47	93.66	0.00681567	49.85	0.0845498	0.176	0.00618637	5.97	0.029218	1.07	9.738	0.0674391	0.052	0.00664841	26.74	0.197267	4.97	0.0480794	0.154	0.00927357	0.61	0.0306839	0.016	0.00154851	0.0243	0.00127669	0.013	0.00433577	0.011	0.00140948	99.39	100.04	0.0909091	3.46591	0.138068	0.230114	3.69318	1457	1350	53 × 40	0.65	0.03	38	10	1059.7	41.86	0.27	0.02	18.66	0.58
2217-48-ol52	93.49	0.0288525	49.85	0.0967394	0.181	0.00617944	6.06	0.0294561	1.02	9.879	0.0537119	0.063	0.00595483	26.25	0.0831788	5.03	0.0224293	0.174	0.0113056	0.657	0.0276422	0.032	0.00125381	0.1861	0.00373076	0.015	0.00267975	0.014	0.00102939	99.4	100.2	0.176796	3.62983	1.02818	1.71363	4.41989	1447	1350	68 × 61	0.8	0.02	38	16	1119.27	35.7	0.66	0.03	23.63	0.53
2217-48-ol59	93.5	0.0228421	50.09	0.106817	0.18	0.00960429	6.13	0.0306114	1.08	9.829	0.0524424	0.065	0.00451902	26.17	0.0919906	5.12	0.0134801	0.158	0.0214999	0.661	0.0227597	0.024	0.00210753	0.0794	0.0025535	0.015	0.00391715	0.014	0.00123183	99.61	100.09	0.133333	3.67222	0.441111	0.735185	2.66667	1455	1350	73 × 65	0.48	0	38	14	1106.7	36.3	0.44	0.03	21.17	0.62
2217-48-ol63	93.54	0.00212454	50.1	0.604829	0.175	0.00600024	6.02	0.061282	1.06	9.848	0.21208	0.056	0.00501395	26.28	0.398026	5.07	0.0980627	0.156	0.0217977	0.613	0.0214889	0.017	0.00120553	0.0365	0.00140342	0.016	0.00417437	0.02	0.00107684	99.47	100.06	0.0971429	3.50286	0.208571	0.347619	3.37143	1452	1350	70 × 52	0.59	0.12	38	19	1079.35	35.83	0.34	0.02	19.47	0.44
2217-48-ol65	93.64	0.0194505	50.14	0.133079	0.174	0.00753738	5.97	0.0365973	1.06	9.746	0.0842054	0.069	0.00470149	26.44	0.128914	5	0.0211323	0.125	0.0141877	0.623	0.0237034	0.02	0.00148732	0.0619	0.00153292	0.014	0.00528006	0.017	0.00180917	99.47	100.08	0.114943	3.58046	0.355747	0.592912	3.50575	1453	1350	115 × 90	0.61	0.15	38	29	1040.63	13.2807	0.387598	0.0101186	19.7497	0.208697
2217-48-ol68	93.3	0.0301842	50	0.0819537	0.184	0.00592886	6.17	0.0261276	1.02	9.989	0.0663434	0.069	0.00697703	25.78	0.317657	5.2	0.0558961	0.22	0.0099539	0.629	0.0211262	0.024	0.00144617	0.1165	0.00268703	0.017	0.00289801	0.018	0.0011469	99.43	100.13	0.130435	3.41848	0.633152	1.05525	3.80435	1442	1350	48 × 42	0.7	0.07	38	13	1133.21	44.76	0.51	0.03	21.92	0.58
2217-48-ol70	93.52	0.0221759	49.91	0.129957	0.175	0.00566596	6.08	0.045437	1.03	9.872	0.0580139	0.058	0.00524828	26.28	0.130692	5.03	0.0373921	0.183	0.00971847	0.63	0.0274645	0.021	0.0014753	0.0771	0.0023906	0.015	0.00321501	0.018	0.00172209	99.38	100.1	0.12	3.6	0.440571	0.734286	4.11429	1449	1350	52 × 41	0.72	0.02	38	15	1072.86	41.2	0.41	0.02	20.3	0.57
2217-48-ol75	93.46	0.0214678	49.99	0.111175	0.176	0.0103052	6.08	0.0318112	1.05	9.855	0.0639165	0.063	0.00614031	26.25	0.124808	5.06	0.0424169	0.192	0.00828438	0.635	0.0288427	0.02	0.00132659	0.0614	0.00159225	0.017	0.00296101	0.018	0.0013601	99.45	100.08	0.113636	3.60795	0.348864	0.581439	3.57955	1451	1350	39 × 38	0.63	0.06	38	12	1112.15	43.15	0.43	0.02	22.12	0.5
2217-48-ol77	93.44	0.01892	50.06	0.160298	0.177	0.00808971	6.11	0.0361493	1.02	9.882	0.0592953	0.071	0.00586065	25.89	0.118225	5.22	0.0353977	0.183	0.0109345	0.644	0.0210617	0.03	0.00145203	0.1683	0.00248656	0.013	0.00483201	0.019	0.00134586	99.49	100.19	0.169492	3.63842	0.950847	1.58475	3.9548	1444	1350	61 × 56	0.7	0.03	38	24	1111.93	42.48	0.63	0.03	23.39	0.47
2217-48-ol79	93.27	0.0243159	50.24	0.0841381	0.18	0.0111612	6.15	0.0359528	1.04	9.965	0.0667612	0.064	0.00550581	25.8	0.0865218	5.14	0.0174251	0.163	0.0199609	0.654	0.0192316	0.018	0.00150124	0.0367	0.00183348	0.015	0.00281708	0.021	0.00124266	99.49	100.06	0.1	3.63333	0.203889	0.339815	3.16667	1447	1350	63 × 66	0.57	0.04	38	17	1082.76	29.45	0.31	0.02	19.5	0.34
2217-48-ol8	93.71	0.0270953	49.81	0.150614	0.178	0.00979273	6.01	0.0328677	1.08	9.734	0.0841454	0.064	0.00631344	26.68	0.0823775	4.99	0.0137238	0.151	0.00866626	0.639	0.0192405	0.033	0.00209413	0.1808	0.0040839	0.015	0.00372677	0.006	0.00182561	99.56	100.18	0.185393	3.58989	1.01573	1.69288	3.48315	1458	1350	48 × 39	0.62	0.09	38	18	1076.66	30.68	0.63	0.03	22.22	0.33
2216-48-ol1	93.05	0.00331273	50.02	0.150122	0.2	0.00824169	6.45	0.034158	0.96	10.136	0.0951666	0.078	0.00537062	24.88	0.320749	5.49	0.105191	0.182	0.0110616	0.733	0.0227879	0.032	0.00195269	0.1824	0.00473458	0.015	0.00305803	0.012	0.00183008	99.37	100.2	0.16	3.665	0.912	1.52	4.15	1429	1350	41 × 38	0.83	0.03	38	13	1193.58	45.36	0.62	0.04	25.57	0.77
2216-48-ol10	92.88	0.00868366	50.36	0.115578	0.2	0.00848553	6.51	0.0438533	0.98	10.124	0.0871645	0.067	0.00493241	24.58	0.190234	5.55	0.0386163	0.184	0.0100485	0.762	0.019209	0.025	0.00165822	0.0848	0.00172461	0.021	0.00326279	0.017	0.0011091	99.45	100.102	0.125	3.81	0.424	0.706667	3.26	1430	1350	66 × 50	0.652	0.0311709	38	17	1208.53	37.95	0.46	0.03	22.47	0.6
2216-48-ol12	92.92	0.00294569	50.15	0.0839741	0.201	0.00655614	6.64	0.0617858	0.96	10.136	0.0869499	0.069	0.0110709	24.51	0.119429	5.56	0.0196346	0.207	0.0135908	0.799	0.0426501	0.035	0.00128399	0.1976	0.00237121	0.02	0.00468723	0.018	0.00125571	99.5	100.21	0.174129	3.97512	0.983085	1.63847	3.53234	1428	1350	57 × 45	0.71	0.02	38	7	1186.86	53.17	0.6	0.04	24.84	0.92
2216-48-ol14	92.9	0.0051861	50.3	0.164618	0.193	0.00734048	6.4	0.0392477	0.95	10.143	0.122422	0.075	0.0061773	24.65	0.248324	5.47	0.0708205	0.218	0.00956699	0.747	0.0316327	0.022	0.00168625	0.0789	0.00174524	0.017	0.00464147	0.019	0.00122275	99.28	100.1	0.11399	3.87047	0.408808	0.681347	4.2487	1426	1350	45 × 45	0.82	0	38	11	1184.47	36.96	0.39	0.03	22.33	0.59
2216-48-ol17	93	0.0133596	50.19	0.133162	0.195	0.00725754	6.55	0.0323929	1	10.108	0.0506386	0.069	0.00536191	24.88	0.18015	5.46	0.036766	0.205	0.0122043	0.723	0.023148	0.028	0.00134134	0.1259	0.00221328	0.015	0.00360815	0.015	0.00113806	99.56	100.14	0.14359	3.70769	0.645641	1.07607	2.97436	1435	1350	43 × 37	0.58	0.03	38	11	1202.52	40.77	0.53	0.03	23.91	0.63
2216-48-ol2	93.06	0.0143596	50.07	0.120841	0.199	0.00672129	6.39	0.0314187	0.96	10.034	0.0739997	0.072	0.00549547	25.02	0.0864789	5.38	0.0201954	0.211	0.0105451	0.765	0.0212159	0.037	0.00207648	0.2148	0.00281972	0.013	0.00388561	0.017	0.00150418	99.38	100.23	0.18593	3.84422	1.0794	1.79899	4.27136	1431	1350	52 × 51	0.85	0.01	38	11	1192.36	37.56	0.7	0.03	26.17	0.61
2216-48-ol24	92.97	0.0179275	49.83	0.177055	0.202	0.0107547	6.45	0.0291768	0.94	10.156	0.0687712	0.077	0.00950881	24.83	0.10057	5.47	0.0246522	0.17	0.0179604	0.789	0.0221988	0.04	0.00137104	0.2148	0.00220752	0.017	0.00347664	0.018	0.00126921	99.2	100.23	0.19802	3.90594	1.06337	1.77228	5.09901	1425	1350	85 × 83	1.03	0.05	38	25	1207.58	41.42	0.74	0.03	26.5	0.46
2216-48-ol3	93.07	0.00177816	50.15	0.218048	0.194	0.00731567	6.58	0.040201	1	10.003	0.0860831	0.067	0.00448403	24.92	0.150212	5.48	0.0391258	0.201	0.0097112	0.786	0.0271309	0.025	0.00136583	0.0618	0.00213252	0.021	0.00388216	0.017	0.00117708	99.51	100.08	0.128866	4.05155	0.318557	0.530928	2.93814	1438	1350	52 × 41	0.57	0.01	38	14	1167.32	38.76	0.41	0.03	23.03	0.5
2216-48-ol7	92.89	0.00757421	50.26	0.0715768	0.2	0.00547608	6.39	0.0227918	0.94	10.154	0.0455969	0.074	0.00574856	24.7	0.077007	5.45	0.0134253	0.208	0.0118644	0.706	0.0171652	0.029	0.00156463	0.1334	0.00263933	0.018	0.00233789	0.016	0.00130666	99.29	100.16	0.145	3.53	0.667	1.11167	4.35	1424	1350	43 × 34	0.87	0.01	38	11	1177.67	44.28	0.53	0.04	23.59	0.7
2216-48-ol8	92.81	0.00557199	50.53	0.181614	0.2	0.0102243	6.56	0.0395375	0.96	10.141	0.0564087	0.072	0.00655135	24.32	0.112026	5.53	0.0203574	0.184	0.00913009	0.802	0.0232945	0.024	0.00131034	0.0606	0.0019293	0.016	0.00364759	0.02	0.0012259	99.42	100.09	0.12	4.01	0.303	0.505	3.35	1426	1350	63 × 60	0.67	0	38	19	1183.16	39.16	0.42	0.03	22.13	0.53
1528B-38-ol10	93.08	0.00788333	50.18	0.163921	0.188	0.011468	6.58	0.048692	0.95	10.05	0.10787	0.056	0.00925867	25.12	0.142347	5.15	0.0717567	0.107	0.0105716	0.717	0.0471786	0.032	0.00378027	0.1586	0.00439851	0.018	0.01014	0.015	0.003629	99.32	100.17	0.170213	3.81383	0.843617	1.40603	4.52128	1431	1300	45 × 57	0.85	0.15	20	6	1069.07	52.06	0.57	0.07	22.31	0.98
1528B-38-ol12	93.22	0.00784774	50.29	0.160928	0.174	0.010904	6.35	0.0465667	1	10.001	0.110011	0.049	0.00882327	25.6	0.14848	5.04	0.069552	0.106	0.00991453	0.683	0.0456244	0.021	0.003563	0.0861	0.00354732	0.011	0.0102307	0.015	0.003463	99.42	100.1	0.12069	3.92529	0.494828	0.824713	3.90805	1441	1300	38 × 38	0.68	0.12
1528B-38-ol16	92.96	0.00780741	50.61	0.161952	0.182	0.0111627	6.41	0.047434	0.98	10.121	0.113355	0.053	0.0091054	25.02	0.145116	5.06	0.07084	0.114	0.0104424	0.74	0.0471133	0.031	0.00378613	0.1268	0.0040576	0.013	0.0107536	0.02	0.00367733	99.48	100.15	0.17033	4.06593	0.696703	1.16117	3.68132	1433	1300	42 × 41	0.67	0.12
1528B-38-ol21-I1	92.66	0.00382158	50.86	0.162752	0.188	0.0111296	6.46	0.047804	0.95	10.251	0.114811	0.05	0.0121733	24.36	0.141288	5.32	0.0748347	0.107	0.0090736	0.703	0.0455544	0.031	0.00369727	0.1568	0.00511168	0.024	0.0137408	0.017	0.00407547	99.47	100.18	0.164894	3.73936	0.834043	1.39007	3.7766	1423	1300	41 × 42	0.71	0.12
1528B-38-ol21-I2	92.66	0.00382158	50.62	0.161984	0.191	0.0113072	6.6	0.04884	0.93	10.263	0.114946	0.056	0.0136341	24.27	0.140766	5.43	0.076382	0.122	0.0103456	0.71	0.046008	0.031	0.00369727	0.1349	0.00439774	0.018	0.0103056	0.017	0.00407547	99.38	100.15	0.162304	3.71728	0.706283	1.17714	4.03141	1420	1300	38 × 32	0.77	0.13
1528B-38-ol22	93.05	0.00784498	50.26	0.164183	0.181	0.0112944	6.55	0.0480333	0.98	10.119	0.110634	0.045	0.009078	25.23	0.144652	5.1	0.07072	0.116	0.0102853	0.712	0.0467072	0.024	0.0037312	0.1488	0.004216	0.018	0.0105288	0.016	0.0034624	99.49	100.16	0.132597	3.9337	0.822099	1.37017	3.70166	1436	1300	41 × 31	0.67	0.11
1528B-38-ol24	92.96	0.00783738	50.35	0.164477	0.183	0.0113704	6.39	0.048138	0.96	10.135	0.107431	0.056	0.0094304	25.12	0.142347	5.13	0.071478	0.118	0.0105571	0.704	0.0471211	0.037	0.00382333	0.2084	0.00482099	0.018	0.0105708	0.017	0.00365273	99.42	100.23	0.202186	3.84699	1.1388	1.898	4.42623	1431	1300	40 × 40	0.81	0.08
1528B-38-ol27	92.83	0.00381273	50.55	0.16513	0.169	0.0115371	6.47	0.049172	0.91	10.181	0.105204	0.066	0.0098164	24.81	0.138936	4.96	0.0720853	0.166	0.0113544	0.687	0.0482732	0.032	0.004	0.1831	0.00473619	0.014	0.0109807	0.017	0.00391453	99.22	100.2	0.189349	4.06509	1.08343	1.80572	5.79882	1421	1300	35 × 32	0.98	0.38
1528B-38-ol2-I1	93.09	0.00786656	50.4	0.16464	0.178	0.0112852	6.45	0.04773	0.96	10.036	0.10772	0.05	0.00936667	25.23	0.144652	5.01	0.070474	0.116	0.0105173	0.742	0.0471912	0.022	0.00367107	0.0539	0.0031801	0.014	0.0104487	0.021	0.0037226	99.27	100.07	0.123596	4.16854	0.302809	0.504682	4.49438	1433	1300	38 × 43	0.8	0.13
1528B-38-ol2-I2	93.09	0.00786656	50.51	0.161632	0.188	0.0110043	6.35	0.0465667	0.97	10.027	0.115645	0.047	0.0084224	25.33	0.148603	4.99	0.068862	0.117	0.0103038	0.693	0.0460614	0.018	0.0033396	0.0574	0.00317613	0.018	0.0094356	0.02	0.00347733	99.33	100.08	0.0957447	3.68617	0.305319	0.508865	3.98936	1435	1300	36 × 41	0.75	0.07
1528B-38-ol35-I1	92.91	0.00779363	50.56	0.161792	0.18	0.01152	6.44	0.0480853	0.96	10.142	0.107505	0.054	0.0093636	24.91	0.144478	5.1	0.0714	0.131	0.0105499	0.714	0.0480284	0.034	0.00376493	0.2054	0.00482005	0.017	0.00964467	0.013	0.00348487	99.46	100.22	0.188889	3.96667	1.14111	1.90185	4.22222	1429	1300	40 × 40	0.76	0.13
1528B-38-ol36	92.96	0.00783341	50.58	0.161856	0.17	0.011186	6.49	0.0475933	0.98	10.121	0.113355	0.05	0.00925333	25.02	0.145116	5.04	0.07056	0.106	0.0102749	0.746	0.0468488	0.034	0.00371053	0.1868	0.00460773	0.015	0.010227	0.011	0.00360433	99.54	100.2	0.2	4.38824	1.09882	1.83137	3.88235	1434	1300	31 × 37	0.66	0.11
1528B-38-ol5	93.18	0.00786089	50.34	0.161088	0.18	0.010908	6.35	0.0461433	0.99	10.013	0.115483	0.04	0.0086	25.62	0.150304	4.88	0.0679947	0.118	0.0100693	0.701	0.0451911	0.019	0.00357453	0.0531	0.00306564	0.016	0.00972693	0.015	0.003537	99.34	99.93	0.105556	3.89444	0.295	0.491667	3.27778	1439	1300	42 × 37	0.59	0.1
1528B-38-ol50	92.82	0.00386654	50.56	0.165163	0.178	0.0115819	6.53	0.0491927	0.92	10.177	0.106519	0.064	0.00956587	24.66	0.141384	5.12	0.0723627	0.126	0.0108444	0.715	0.0484293	0.021	0.003829	0.06	0.00336	0.016	0.0104352			99.37	100.29	0.117978	4.01685	0.337079	0.561798	5.16854	1421	1300	34 × 32	0.92	0.14
1528B-45-ol147	92.74	0.0184978	50.11	0.0694345	0.196	0.00514667	6.61	0.0221345	0.9	10.291	0.0472684	0.058	0.00423472	24.39	0.0754159	5.51	0.013149	0.114	0.00756738	0.7	0.0155643	0.032	0.00108697	0.2116	0.00192762	0.017	0.00229398	0.019	0.00101045	99.16	100.23	0.163265	3.57143	1.07959	1.79932	5.45918	1416	1300	51 × 44	1.07	0.15	38	15	1140.83	46.55	0.74	0.05	25	0.92
1528B-45-ol148	92.77	0.00575186	50.4	0.0698363	0.2	0.00515425	6.82	0.0223127	0.92	10.171	0.0486746	0.055	0.00419206	24.3	0.0757599	5.49	0.013172	0.081	0.00737527	0.739	0.0159006	0.026	0.00105938	0.1383	0.00161831	0.016	0.00221092	0.016	0.000978061	99.37	100.15	0.13	3.695	0.6915	1.1525	3.9	1422	1300	54 × 54	0.78	0.11
1528B-45-ol149	92.87	0.0110793	50.1	0.0694206	0.185	0.00504636	6.38	0.0216098	0.88	10.208	0.0457085	0.058	0.0041537	24.79	0.0756986	5.22	0.0127252	0.128	0.00749513	0.659	0.0150848	0.033	0.00109663	0.1651	0.00172223	0.019	0.0023058	0.015	0.000938178	98.85	100.19	0.178378	3.56216	0.892432	1.48739	7.24324	1415	1300	46 × 36	1.34	0.19
1528B-45-ol150	92.85	0.00930977	50.29	0.0696839	0.197	0.00515556	6.65	0.0220124	0.93	10.169	0.0474908	0.056	0.00412228	24.53	0.0755328	5.45	0.0130058	0.071	0.00770379	0.738	0.0158505	0.037	0.00112373	0.226	0.00197752	0.015	0.00222008	0.019	0.000977698	99.37	100.24	0.187817	3.74619	1.14721	1.91201	4.41624	1423	1300	76 × 76	0.87	0.12	20	26	1177.97	36.05	0.82	0.04	25.3	0.54
1528C-38-ol1	93.09	0.00994192	50.38	0.164575	0.182	0.0113568	6.41	0.0478613	0.97	10.034	0.109705	0.057	0.0092036	25.24	0.146392	5.14	0.0712747	0.121	0.0105028	0.671	0.0461648	0.025	0.00370333	0.1059	0.003883	0.021	0.010745	0.017	0.003655	99.37	100.13	0.137363	3.68681	0.581868	0.96978	4.17582	1433	1300	34 × 37	0.76	0.14	20	14	1126.88	52.29	0.39	0.05	21.86	0.95
1528C-38-ol14	93.15	0.00984783	50.27	0.164215	0.184	0.0112117	6.48	0.04752	0.99	10.013	0.111478	0.039	0.0091806	25.35	0.14872	5.21	0.0712033	0.098	0.0101267	0.668	0.0455576	0.018	0.0034644	0.044	0.00301547	0.025	0.0104283	0.009	0.00339	99.39	100.05	0.0978261	3.63043	0.23913	0.398551	3.58696	1438	1300	51 × 25	0.66	0.12	20	11	1143.87	40.61	0.31	0.03	20.47	0.68
1528C-38-ol21-i1	93.43	0.00990055	50.36	0.161152	0.177	0.0107616	6.08	0.044992	1.06	9.849	0.112279	0.047	0.00865113	26.08	0.153003	5	0.0683333	0.1	0.00980667	0.662	0.0432507	0.029	0.00355347	0.1475	0.00411033	0.023	0.00952047	0.016	0.0033728	99.63	100.17	0.163842	3.74011	0.833333	1.38889	3.05085	1451	1300	41 × 42	0.54	0.11	20	15	1067.93	50.94	0.58	0.04	21.73	0.67
1528C-38-ol21-i2	93.43	0.00990055	50.2	0.16064	0.181	0.0108117	6.23	0.0456867	1.06	9.849	0.107026	0.053	0.00875207	25.97	0.15582	5.12	0.0689493	0.115	0.009959	0.67	0.0443093	0.029	0.00346067	0.1274	0.00391543	0.017	0.00989287	0.016	0.0033216	99.63	100.14	0.160221	3.70166	0.703867	1.17311	2.81768	1452	1300	38 × 32	0.51	0.1	20	24	1134.06	52.51	0.56	0.05	21.33	0.75
1528C-38-ol23	93.26	0.00997691	50.24	0.160768	0.181	0.0108359	6.32	0.0463467	1.01	9.988	0.109868	0.05	0.00873	25.73	0.152665	5.06	0.0691533	0.138	0.010304	0.622	0.0432083	0.024	0.0035056	0.078	0.0034112	0.019	0.0102017	0.012	0.0035352	99.47	100.09	0.132597	3.43646	0.430939	0.718232	3.42541	1443	1300	34 × 30	0.62	0.12	20	14	1090.16	56.8	0.43	0.06	20.25	0.9
1528C-38-ol25-i1	93.11	0.00988941	50.55	0.16176	0.188	0.0109792	6.44	0.0472267	1	10.002	0.114023	0.042	0.00896	25.23	0.146334	5.05	0.06969	0.128	0.010368	0.756	0.0465696	0.024	0.0036064	0.0755	0.00343273	0.02	0.00985467	0.018	0.0035952	99.52	100.1	0.12766	4.02128	0.401596	0.669326	3.08511	1440	1300	47 × 40	0.58	0.11	20	12	1088.9	59.35	0.42	0.09	20	1.1
1528C-38-ol28	93.27	0.0100554	50.1	0.16366	0.184	0.0109787	6.34	0.046916	1.01	9.993	0.109257	0.049	0.00897353	25.64	0.148712	5.17	0.0706567	0.108	0.0101304	0.683	0.046444	0.027	0.0036666	0.1198	0.00388951	0.005	0.0103313	0.008	0.0033776	99.44	100.13	0.146739	3.71196	0.651087	1.08514	3.75	1442	1300	31 × 30	0.69	0.13	20	18	1132.11	58.42	0.54	0.06	22.02	0.91
1528C-38-ol30	93.43	0.0099884	50.08	0.163595	0.171	0.0107274	6.16	0.045584	1	9.902	0.107602	0.055	0.00897233	26.25	0.154	4.79	0.06706	0.151	0.0105297	0.608	0.0425195	0.02	0.00338533	0.0662	0.0032438	0.02	0.00977867	0.017	0.00353147	99.29	100.09	0.116959	3.55556	0.387135	0.645224	4.67836	1445	1300	30 × 30	0.8	0.15
1528C-38-ol32	93.2	0.00987732	50.51	0.161632	0.184	0.0108805	6.31	0.0462733	1.03	9.978	0.113749	0.046	0.00857133	25.54	0.149835	4.99	0.068862	0.116	0.0102312	0.715	0.0453787	0.028	0.00355787	0.128	0.00395947	0.025	0.010555	0.015	0.003586	99.61	100.14	0.152174	3.88587	0.695652	1.15942	2.88043	1445	1300	37 × 34	0.53	0.09
1528C-38-ol34	93.1	0.01001	50.43	0.164738	0.184	0.011224	6.43	0.0480107	0.99	10.011	0.109454	0.058	0.00926067	25.14	0.145812	5.22	0.071688	0.106	0.0103668	0.738	0.0475272	0.036	0.0038472	0.205	0.00481067	0.017	0.0103247	0.019	0.0035644	99.58	100.23	0.195652	4.01087	1.11413	1.85688	3.53261	1437	1300	57 × 68	0.65	0.2	20	21	1108.78	47.68	0.74	0.06	24.23	0.93
1528C-38-ol36	93.27	0.00788874	50.47	0.164869	0.171	0.011058	6.2	0.0462933	1.05	9.954	0.115466	0.053	0.00881213	25.71	0.15426	5.1	0.07038	0.077	0.0098406	0.697	0.046002	0.019	0.00351373	0.0633	0.00326628	0.012	0.0094768	0.018	0.0036432	99.58	100.08	0.111111	4.07602	0.370175	0.616959	2.92398	1448	1300	55 × 45	0.5	0.07
1528C-38-ol37-I1	93.12	0.00997773	50.52	0.165032	0.174	0.0108692	6.27	0.047652	0.98	10.023	0.101566	0.063	0.0093324	25.44	0.147552	4.98	0.06972	0.147	0.010192	0.631	0.0462313	0.026	0.0040144	0.1438	0.00423731	0.013	0.00933573	0.017	0.00333993	99.42	100.16	0.149425	3.62644	0.826437	1.37739	4.25287	1435	1300	28 × 30	0.74	0.11	20	7	1067.35	57.42	0.52	0.08	22.11	1.34
1528C-38-ol37-I2	93.12	0.00997773	50.41	0.161312	0.173	0.0110374	6.24	0.047008	0.95	10.044	0.107136	0.063	0.0091686	25.47	0.146028	4.95	0.06963	0.147	0.0107408	0.628	0.0436251	0.026	0.0036556	0.1431	0.00416898	0.013	0.0100897	0.017	0.0035904	99.27	100.16	0.150289	3.63006	0.827168	1.37861	5.14451	1432	1300	28 × 30	0.89	0.13
1528C-38-ol39	92.97	0.00778092	50.64	0.162048	0.182	0.0113204	6.19	0.047044	0.97	10.134	0.106745	0.049	0.00943087	25.19	0.144423	5	0.0706667	0.146	0.0108527	0.651	0.0455266	0.037	0.0039072	0.1878	0.00466996	0.023	0.0096094	0.018	0.0037908	99.41	100.2	0.203297	3.57692	1.03187	1.71978	4.34066	1431	1300	35 × 30	0.79	0.11
1528C-38-ol41	93.11	0.0099638	50.38	0.164575	0.177	0.0111628	6.3	0.04704	0.96	10.038	0.10908	0.052	0.00917627	25.36	0.147088	5.01	0.07014	0.129	0.0105608	0.687	0.0461206	0.023	0.0036662	0.0891	0.0036234	0.021	0.0100856	0.018	0.0036648	99.24	100.1	0.129944	3.88136	0.50339	0.838983	4.85876	1432	1300	32 × 38	0.86	0.2	20	10	1061.31	140.09	0.47	0.08	20.5	0.94
1528C-38-ol42	93.34	0.00994132	50.11	0.163693	0.177	0.0110802	6.22	0.0464427	0.97	9.927	0.107212	0.054	0.0090828	25.86	0.148264	4.95	0.06897	0.126	0.0105	0.65	0.04433	0.036	0.0036864	0.1849	0.00449923	0.019	0.0100295	0.016	0.00359893	99.29	100.2	0.20339	3.67232	1.04463	1.74105	5.14124	1438	1300	35 × 35	0.91	0.16
1528C-38-ol45	93.17	0.00786673	50.55	0.16176	0.184	0.0110891	6.37	0.0467133	1.03	9.979	0.109769	0.06	0.008956	25.44	0.147552	5.03	0.069414	0.093	0.010106	0.714	0.0460768	0.022	0.00350093	0.0962	0.00364919	0.03	0.01043	0.011	0.00350827	99.6	100.1	0.119565	3.88043	0.522826	0.871377	2.71739	1444	1300	49 × 43	0.5	0.07	20	6	1132.87	56.19	0.35	0.05	19.9	1.17
1528C-38-ol46	93.12	0.0100405	50.33	0.161056	0.188	0.0110293	6.56	0.047232	0.97	10.028	0.114319	0.044	0.00884107	25.34	0.146972	5.01	0.069138	0.125	0.0102667	0.667	0.0447779	0.024	0.0035456	0.0852	0.00353864	0.022	0.0107697	0.017	0.0034748	99.41	100.1	0.12766	3.54787	0.453191	0.755319	3.67021	1436	1300	32 × 30	0.69	0.25
1528C-38-ol48	92.94	0.0099073	50.55	0.16176	0.19	0.0112987	6.55	0.0480333	0.99	10.113	0.110569	0.052	0.0091624	24.86	0.144188	5.25	0.07175	0.109	0.0102533	0.721	0.0471534	0.032	0.0037568	0.1867	0.00461771	0.012	0.0101624	0.014	0.0035056	99.62	100.2	0.168421	3.79474	0.982632	1.63772	3.05263	1434	1300	40 × 45	0.58	0.09	20	18	1088.77	44.31	0.64	0.06	23.16	1.01
1528C-38-ol54-I1	92.94	0.00781929	50.63	0.162016	0.189	0.0116676	6.42	0.048792	0.97	10.126	0.106661	0.048	0.0073824	24.98	0.143219	5.13	0.072162	0.111	0.008399	0.698	0.051652	0.022	0.00234227	0.1252	0.00318843	0.013	0.00719073	0.012	0.0028992	99.47	100.14	0.116402	3.69312	0.662434	1.10406	3.54497	1432	1300	33 × 35	0.67	0.1
1528C-38-ol54-I2	92.94	0.00781929	50.62	0.161984	0.189	0.0112896	6.41	0.0478613	0.97	10.128	0.110733	0.048	0.0092384	24.98	0.144884	5.13	0.071136	0.111	0.0104414	0.698	0.0456492	0.022	0.0036168	0.1251	0.00401988	0.013	0.0101651	0.012	0.0035984	99.45	100.14	0.116402	3.69312	0.661905	1.10317	3.65079	1432	1300	33 × 35	0.69	0.1
1528C-38-ol58	93.27	0.00788514	50.34	0.161088	0.169	0.010816	6.1	0.0455467	1.01	9.988	0.109868	0.05	0.00868333	26.01	0.150858	4.81	0.0676607	0.131	0.0102617	0.641	0.043588	0.021	0.0033978	0.0951	0.0036138	0.014	0.009828	0.012	0.0036064	99.39	100.11	0.12426	3.7929	0.562722	0.93787	4.26036	1444	1300	35 × 34	0.72	0.07
1528C-38-ol62	93.24	0.0079148	50.19	0.160608	0.196	0.0110152	6.47	0.046584	1.02	9.984	0.113818	0.057	0.0087286	25.57	0.148306	5.11	0.069496	0.13	0.0103393	0.687	0.044884	0.029	0.00355927	0.151	0.0041374	0.01	0.009742	0.019	0.00354667	99.62	100.17	0.147959	3.5051	0.770408	1.28401	2.80612	1445	1300	35 × 37	0.55	0.09
1528C-38-ol63	93.16	0.00783967	50.44	0.164771	0.18	0.011148	6.13	0.046588	0.99	10.012	0.108797	0.048	0.0090368	25.69	0.149002	4.92	0.069536	0.146	0.0106483	0.648	0.044496	0.023	0.0036984	0.1111	0.00388109	0.012	0.0102488	0.013	0.00364693	99.36	100.12	0.127778	3.6	0.617222	1.0287	4.22222	1438	1300	28 × 31	0.76	0.08
1528C-38-ol7	92.49	0.00974879	51.19	0.163808	0.212	0.0117872	6.71	0.0492067	0.96	10.245	0.110646	0.057	0.0094126	23.83	0.141391	5.4	0.07416	0.066	0.0100804	0.772	0.0488419	0.043	0.00391587	0.2137	0.00495784	0.026	0.0107259	0.013	0.00360707	99.72	100.23	0.20283	3.64151	1.00802	1.68003	2.40566	1423	1300	68 × 68	0.51	0.08	20	20	1185.18	45.04	0.79	0.04	24.79	0.53
1528C-38-ol8	93.34	0.00992027	50.21	0.164019	0.164	0.0109115	6.27	0.046398	1	9.908	0.11097	0.045	0.008838	25.87	0.150046	4.96	0.0687787	0.136	0.0104176	0.651	0.0440944	0.018	0.0035352	0.0574	0.00320675	0.023	0.0101553	0.014	0.0034664	99.32	100.07	0.109756	3.96951	0.35	0.583333	4.57317	1442	1300	35 × 32	0.75	0.14
1528C-41-ol2-I1	93.08	0.00990029	50.37	0.164542	0.171	0.0118446	6.41	0.0491433	0.97	10.031	0.107666	0.051	0.009741	25.17	0.137596	5.16	0.073272	0.196	0.011956	0.695	0.0477233	0.024	0.0038288	0.1228	0.00415064	0.012	0.0113368	0.022	0.00395853	99.39	100.14	0.140351	4.06433	0.718129	1.19688	4.38596	1433	1330	35 × 35	0.75	0.17
1528C-41-ol2-I2	93.08	0.00990029	50.29	0.164281	0.183	0.0117974	6.51	0.04991	0.97	10.03	0.105649	0.059	0.00995527	25.15	0.137487	5.18	0.0739013	0.202	0.01212	0.673	0.0480073	0.03	0.00405	0.1294	0.00422707	0.029	0.0112481	0.017	0.00396893	99.44	100.14	0.163934	3.6776	0.707104	1.17851	3.82514	1434	1330	38 × 41	0.7	0.16	20	15	1095.07	48.51	0.65	0.06	20.92	0.83
1528C-41-ol3	93.13	0.00992124	50.23	0.164085	0.192	0.0119424	6.36	0.049184	0.96	10.037	0.106392	0.058	0.00979427	25.37	0.138689	5.06	0.072864	0.219	0.012191	0.662	0.0470461	0.023	0.00377353	0.0737	0.00361621	0.023	0.0109833	0.016	0.0037056	99.28	100.09	0.119792	3.44792	0.383854	0.639757	4.21875	1433	1330	36 × 36	0.81	0.09
1528C-44-ol1	93.21	0.00324603	50.26	0.085294	0.189	0.00663317	6.49	0.0275347	1.05	9.962	0.0530663	0.061	0.0055834	25.4	0.0826184	5.2	0.0164237	0.195	0.0101687	0.71	0.0195317	0.034	0.00145524	0.1759	0.00230524	0.015	0.00286971	0.016	0.00118041	99.77	100.2	0.179894	3.75661	0.930688	1.55115	2.27513	1448	1350	52 × 52	0.43	0.06
1528C-44-ol10	92.93	0.00318816	50.3	0.0853619	0.189	0.00679512	6.52	0.0279694	0.97	10.131	0.0525338	0.069	0.00581279	24.72	0.0815718	5.47	0.0170186	0.202	0.0103608	0.715	0.019684	0.03	0.00146044	0.2294	0.00261699	0.012	0.00274194	0.024	0.00129169	99.57	100.26	0.15873	3.78307	1.21376	2.02293	3.65079	1430	1350	60 × 60	0.69	0.14
1528C-44-ol13	93	0.0031785	50.36	0.0854638	0.19	0.0066345	6.53	0.027551	1	10.099	0.0547482	0.062	0.00562677	24.96	0.0823638	5.32	0.016552	0.182	0.0100399	0.716	0.0194589	0.026	0.00144404	0.1024	0.00187057	0.015	0.00286268	0.021	0.00122088	99.59	100.13	0.136842	3.76842	0.538947	0.898246	2.84211	1437	1350	76 × 76	0.54	0.08
1528C-44-ol14	93.01	0.00320677	50.18	0.0851583	0.19	0.00650938	6.44	0.027019	0.97	10.127	0.0534678	0.06	0.00553301	25.05	0.0838417	5.38	0.016485	0.198	0.0100305	0.645	0.0185649	0.02	0.00137598	0.081	0.00170509	0.016	0.00283183	0.02	0.00124072	99.37	100.1	0.105263	3.39474	0.426316	0.710526	3.84211	1432	1350	43 × 43	0.73	0.08
1528C-44-ol15	93.09	0.00317323	50.02	0.0848868	0.178	0.00655102	6.4	0.0274546	0.93	10.069	0.0510262	0.07	0.00575515	25.2	0.0819678	5.24	0.016427	0.201	0.0101483	0.629	0.0186952	0.024	0.00143851	0.1296	0.00205284	0.013	0.00283567	0.024	0.0012749	99.12	100.16	0.134831	3.53371	0.72809	1.21348	5.8427	1426	1350	46 × 46	1.04	0.16
1528C-44-ol17	92.95	0.00317223	50.26	0.085294	0.188	0.00676053	6.55	0.0279441	0.97	10.127	0.0534678	0.065	0.00577435	24.82	0.0813189	5.43	0.0168942	0.184	0.0104594	0.687	0.0193539	0.036	0.00150785	0.2136	0.00250725	0.016	0.00282937	0.02	0.00125229	99.56	100.23	0.191489	3.65426	1.13617	1.89362	3.56383	1431	1350	61 × 61	0.67	0.16	20	15	1091.85	45.75	0.73	0.05	23.32	0.81
1528C-44-ol18	93.05	0.00317899	50.1	0.0850225	0.193	0.00658261	6.48	0.02734	0.98	10.118	0.0541363	0.065	0.00563523	25.09	0.0827928	5.37	0.0164544	0.161	0.00989304	0.682	0.019082	0.032	0.00145293	0.1864	0.00234612	0.018	0.00291463	0.02	0.00123675	99.5	100.2	0.165803	3.53368	0.965803	1.60967	3.62694	1434	1350	65 × 65	0.7	0.1
1528C-44-ol19-i2	93.06	0.00318597	50.28	0.085328	0.193	0.00681667	6.51	0.0279265	0.97	10.026	0.0505714	0.074	0.00584677	25.01	0.0813498	5.34	0.0167405	0.22	0.0106315	0.662	0.0192244	0.029	0.00149807	0.2624	0.00275843	0.017	0.00310737	0.02	0.00127499	99.63	100.29	0.150259	3.43005	1.35959	2.26598	3.41969	1433	1350	47 × 47	0.66	0.1
1528C-44-ol20	92.76	0.00324213	50.45	0.0856165	0.19	0.00693317	6.6	0.0283126	0.92	10.175	0.0532416	0.07	0.00603243	24.39	0.0804829	5.44	0.0171818	0.233	0.0108575	0.669	0.019411	0.023	0.00144637	0.1089	0.00197387	0.016	0.00296353	0.022	0.00128298	99.3	100.13	0.121053	3.52105	0.573158	0.955263	4.36842	1420	1350	43 × 43	0.83	0.12
1528C-44-ol21	93.06	0.00326319	50.16	0.0851243	0.188	0.00658479	6.44	0.0273226	0.93	10.062	0.0538367	0.06	0.00559221	25.1	0.0822363	5.21	0.016333	0.183	0.0100159	0.677	0.0189251	0.02	0.00136709	0.0802	0.00170508	0.016	0.00278216	0.017	0.00122121	99.14	100.1	0.106383	3.60106	0.426596	0.710993	5.10638	1427	1350	46 × 46	0.96	0.16
1528C-44-ol22	92.99	0.00316962	50.21	0.0852092	0.185	0.00659985	6.58	0.0276064	0.97	10.126	0.0546564	0.063	0.0056264	25	0.0824958	5.26	0.0163653	0.213	0.0101875	0.693	0.01916	0.023	0.00139748	0.0867	0.00175348	0.017	0.0028534	0.023	0.00124654	99.44	100.11	0.124324	3.74595	0.468649	0.781081	3.62162	1433	1350	44 × 44	0.67	0.1
1528C-44-ol23	92.95	0.00317515	50.38	0.0854977	0.194	0.0066715	6.6	0.0276903	0.99	10.114	0.0548295	0.063	0.00558945	24.84	0.0813844	5.33	0.0165831	0.17	0.00974218	0.706	0.0195363	0.03	0.00143556	0.1356	0.00206789	0.015	0.00281503	0.019	0.00117586	99.58	100.16	0.154639	3.63918	0.698969	1.16495	2.98969	1434	1350	85 × 85	0.58	0.22
1528C-44-ol24-i1	92.96	0.00318631	50.45	0.0856165	0.184	0.00672663	6.46	0.0274075	1.01	10.096	0.0530667	0.068	0.00563178	24.99	0.0824628	5.31	0.0165208	0.129	0.0103768	0.719	0.0196938	0.028	0.00143816	0.1145	0.00194313	0.017	0.00303821	0.022	0.00123466	99.59	100.14	0.152174	3.90761	0.622283	1.03714	2.98913	1438	1350	118 × 118	0.55	0.09	38	20	1050.29	36.02	0.59	0.04	20.01	0.56
1528C-44-ol24-i2	92.96	0.00318631	50.32	0.0853959	0.191	0.00670347	6.55	0.0279441	0.98	10.123	0.0544011	0.063	0.00569463	24.87	0.0814827	5.28	0.0166764	0.205	0.0104208	0.731	0.0199008	0.03	0.00148438	0.1176	0.00197914	0.019	0.00297967	0.02	0.00126864	99.49	100.14	0.157068	3.82723	0.615707	1.02618	3.40314	1433	1350	35 × 35	0.65	0.12
1528C-44-ol25	93.15	0.00321667	50.24	0.0852601	0.18	0.00645423	6.47	0.0271449	0.99	10.006	0.0551874	0.057	0.00546266	25.3	0.0834857	5.22	0.0162408	0.169	0.00974942	0.695	0.0190037	0.019	0.00133352	0.0525	0.00149154	0.018	0.0028487	0.02	0.00119195	99.44	100.08	0.105556	3.86111	0.291667	0.486111	3.55556	1438	1350	67 × 67	0.64	0.1
1528C-44-ol26	93.06	0.00316886	50.21	0.0852092	0.192	0.00671438	6.34	0.0271972	0.95	10.05	0.0518774	0.07	0.00580134	25.05	0.0838749	5.43	0.0167667	0.167	0.0102106	0.623	0.0185074	0.025	0.00141245	0.1248	0.00200347	0.018	0.00281586	0.021	0.00124308	99.27	100.15	0.130208	3.24479	0.65	1.08333	4.58333	1428	1350	60 × 60	0.88	0.12	20	17	1127.3	49.26	0.53	0.05	21.5	0.77
1528C-44-ol27	93.14	0.00325476	49.95	0.084768	0.187	0.0066607	6.49	0.0272288	0.98	10.021	0.0536173	0.06	0.00564765	25.13	0.085294	5.57	0.0168046	0.209	0.0102312	0.635	0.0184844	0.031	0.00143014	0.2155	0.0024889	0.016	0.00280868	0.018	0.00121297	99.51	100.23	0.165775	3.39572	1.15241	1.92068	3.85027	1434	1350	53 × 53	0.72	0.12
1528C-44-ol28	92.93	0.00317829	50.24	0.0864524	0.192	0.00689713	6.67	0.0282984	0.97	10.126	0.0539399	0.067	0.00578937	24.69	0.0814728	5.45	0.0169564	0.191	0.0106221	0.722	0.019979	0.037	0.00153579	0.206	0.00248115	0.015	0.00297461	0.022	0.0013074	99.6	100.23	0.192708	3.76042	1.07292	1.78819	3.28125	1431	1350	52 × 52	0.63	0.24
1528C-44-ol29	93.13	0.0032256	50.18	0.0851583	0.197	0.00670706	6.53	0.0273966	0.99	10.012	0.0545131	0.067	0.00564009	25.18	0.0824984	5.27	0.0163964	0.192	0.0103039	0.702	0.0192134	0.036	0.00147833	0.1975	0.00239275	0.015	0.00280594	0.019	0.0012093	99.59	100.22	0.182741	3.56345	1.00254	1.6709	3.19797	1438	1350	54 × 54	0.63	0.1
1528C-44-ol3	92.69	0.00334353	50.7	0.12506	0.207	0.010212	6.55	0.0410467	0.99	10.215	0.072186	0.082	0.00886147	24.26	0.114831	5.59	0.0249687	0.257	0.0160368	0.658	0.0279431	0.026	0.00216493	0.1383	0.00311636	0.014	0.00445293	0.02	0.00189067	99.69	100.15	0.125604	3.17874	0.668116	1.11353	2.22222	1429	1350	46 × 46	0.46	0.08
1528C-44-ol30	92.95	0.00315074	50.36	0.0854638	0.189	0.00665123	6.57	0.0278741	0.99	10.114	0.0543528	0.067	0.00570322	24.81	0.0818688	5.4	0.0168009	0.162	0.0100086	0.713	0.0195788	0.031	0.00145273	0.1319	0.00205811	0.016	0.00306096	0.021	0.00122215	99.57	100.15	0.164021	3.77249	0.697884	1.16314	3.06878	1434	1350	78 × 78	0.58	0.08	20	15	1101.73	52.55	0.58	0.05	21.72	0.77
1528C-44-ol31	92.94	0.00332272	50.4	0.0855316	0.194	0.00676326	6.45	0.0278215	0.98	10.124	0.0548837	0.061	0.00579026	24.85	0.0825886	5.31	0.0167712	0.232	0.0106395	0.702	0.0195251	0.036	0.00153647	0.1735	0.00233099	0.022	0.00297873	0.018	0.00122571	99.55	100.2	0.185567	3.61856	0.89433	1.49055	3.35052	1432	1350	53 × 53	0.65	0.1
1528C-44-ol32	92.69	0.00311837	50.34	0.0866245	0.201	0.00698095	6.53	0.02817	0.93	10.265	0.051777	0.081	0.00597178	24.27	0.0829491	5.67	0.0175078	0.225	0.0110112	0.645	0.0192204	0.029	0.00151955	0.1803	0.00237605	0.016	0.00309522	0.022	0.00127837	99.4	100.2	0.144279	3.20896	0.897015	1.49502	3.9801	1419	1350	39 × 39	0.8	0.12
1528C-44-ol33	93.12	0.00321825	50.12	0.0850565	0.194	0.00670849	6.48	0.0274923	0.98	10.022	0.0543308	0.064	0.00564133	25.15	0.0829908	5.4	0.0165463	0.199	0.0104504	0.666	0.0188849	0.031	0.00147679	0.1633	0.00220939	0.015	0.00286833	0.021	0.00122358	99.49	100.18	0.159794	3.43299	0.841753	1.40292	3.5567	1435	1350	66 × 66	0.69	0.1
1528C-44-ol35	92.79	0.00310869	50.36	0.0854638	0.195	0.00663722	6.55	0.0273266	0.93	10.167	0.0508056	0.072	0.00565788	24.35	0.0849501	5.66	0.0168093	0.209	0.0101464	0.663	0.0188513	0.028	0.00143219	0.2103	0.00246858	0.017	0.00283094	0.021	0.00123227	99.42	100.23	0.14359	3.4	1.07846	1.79744	4.15385	1420	1350	59 × 59	0.81	0.11
1528C-44-ol36	93.05	0.00325775	50.36	0.0854638	0.181	0.00653197	6.38	0.027068	1.01	10.097	0.0547374	0.06	0.00541862	25.19	0.0831228	5.24	0.0163031	0.17	0.0095846	0.698	0.0189363	0.02	0.00140287	0.068	0.00161247	0.014	0.00300038	0.019	0.00121432	99.5	100.09	0.110497	3.85635	0.375691	0.626151	3.25967	1438	1350	88 × 88	0.59	0.08	20	12	1069.51	44.06	0.38	0.07	18.92	0.79
1528C-44-ol37-i1	93.02	0.00313306	50.05	0.0849377	0.19	0.0065631	6.45	0.027061	0.95	10.151	0.0545516	0.064	0.00551887	25.08	0.0827598	5.21	0.0162097	0.173	0.0099414	0.726	0.0195422	0.027	0.00136537	0.1321	0.0020114	0.017	0.00294293	0.018	0.0012163	99.23	100.15	0.142105	3.82105	0.695263	1.15877	4.84211	1429	1350	77 × 77	0.92	0.13	38	22	1095.14	45.89	0.56	0.05	21.06	0.81
1528C-44-ol37-i2	93.02	0.00313306	50.11	0.0850395	0.181	0.00640433	6.48	0.0270345	0.95	10.145	0.0549976	0.064	0.00549377	25.1	0.0828258	5.18	0.0161164	0.147	0.00956108	0.718	0.0191405	0.027	0.00138225	0.1275	0.00197448	0.018	0.00277984	0.02	0.00123967	99.27	100.15	0.149171	3.96685	0.70442	1.17403	4.86188	1430	1350	69 × 69	0.88	0.12
1528C-44-ol39	93.2	0.00322532	50.09	0.0850055	0.182	0.0064263	6.49	0.0272288	0.99	10.008	0.0537831	0.06	0.00550072	25.45	0.082781	5.14	0.0159919	0.173	0.00976247	0.687	0.0190429	0.035	0.00143628	0.2001	0.00240538	0.014	0.002819	0.019	0.00119843	99.55	100.22	0.192308	3.77473	1.09945	1.83242	3.68132	1440	1350	53 × 53	0.67	0.1
1528C-44-ol4	92.98	0.00331125	50.13	0.0850734	0.197	0.00649192	6.55	0.0268648	0.99	10.115	0.0526941	0.069	0.00548945	24.88	0.0879719	5.53	0.0164233	0.18	0.00988686	0.676	0.0187073	0.034	0.00146876	0.2158	0.00245681	0.017	0.00272441	0.02	0.00121017	99.61	100.23	0.172589	3.43147	1.09543	1.82572	3.14721	1434	1350	60 × 60	0.62	0.02
1528C-44-ol40	93.2	0.00699135	49.91	0.0710784	0.183	0.00529243	6.54	0.0226552	0.96	10.034	0.0454443	0.055	0.00437316	25.5	0.0706677	5.08	0.0130356	0.214	0.00832486	0.666	0.0156456	0.018	0.0010767	0.0744	0.00132999	0.014	0.00235771	0.023	0.00104467	99.27	100.09	0.0983607	3.63934	0.406557	0.677596	4.48087	1436	1350	32 × 32	0.82	0.12
1528C-44-ol41	92.93	0.00560371	50.19	0.0583608	0.191	0.00452059	6.54	0.018909	0.93	10.165	0.0367373	0.059	0.00372703	24.89	0.0559299	5.2	0.0109492	0.199	0.0069585	0.698	0.0133055	0.019	0.000907904	0.0702	0.00108566	0.017	0.00201986	0.02	0.000865678	99.19	100.09	0.0994764	3.65445	0.367539	0.612565	4.71204	1425	1350	57 × 40	0.9	0.13	20	14	1134.26	53.54	0.39	0.05	20.2	0.94
1528C-44-ol42	92.96	0.00657728	49.92	0.0710926	0.196	0.00545573	6.32	0.0225421	0.92	10.176	0.0407341	0.069	0.00456682	24.94	0.0719998	5.48	0.0134992	0.257	0.0086423	0.588	0.0151571	0.024	0.00111422	0.1488	0.00172969	0.017	0.00251944	0.018	0.00104493	99.07	100.17	0.122449	3	0.759184	1.26531	5.61224	1421	1350	25 × 25	1.1	0.15
1528C-44-ol5	93.03	0.00327956	50.33	0.0854128	0.175	0.00655259	6.45	0.027365	0.99	10.115	0.0550739	0.057	0.00555753	25.21	0.0831888	5.12	0.0160508	0.186	0.00997434	0.674	0.0189074	0.02	0.00137273	0.0456	0.00142968	0.018	0.00300504	0.021	0.00124003	99.41	100.07	0.114286	3.85143	0.260571	0.434286	3.77143	1436	1350	44 × 44	0.66	0.06
1528C-44-ol6	92.92	0.00323926	50.28	0.085328	0.193	0.00673348	6.52	0.027662	0.95	10.148	0.0538184	0.068	0.00568726	24.83	0.0825221	5.35	0.0166453	0.186	0.0101504	0.663	0.0189717	0.029	0.00144431	0.138	0.00211752	0.017	0.00303934	0.017	0.00122222	99.39	100.16	0.150259	3.43523	0.715026	1.19171	3.98964	1428	1350	41 × 41	0.77	0.12	20	13	1190.51	65.6	0.57	0.08	21.92	0.97
1528C-44-ol8	92.95	0.00330053	50.16	0.120384	0.197	0.00893067	6.47	0.0370947	0.94	10.155	0.078532	0.059	0.007434	24.87	0.127666	5.36	0.022512	0.205	0.0138443	0.685	0.0260757	0.019	0.00181007	0.0662	0.00216695	0.015	0.00394	0.023	0.00172653	99.22	100.09	0.0964467	3.47716	0.336041	0.560068	4.41624	1426	1350	43 × 43	0.87	0.14
1528C-44-ol9	92.95	0.00327482	50.13	0.0850734	0.203	0.00673236	6.57	0.0275662	0.96	10.135	0.0530323	0.065	0.00566947	24.78	0.0852822	5.55	0.0168756	0.193	0.0102632	0.655	0.0186361	0.031	0.00145529	0.1922	0.00237384	0.017	0.002935	0.018	0.00121992	99.5	100.21	0.152709	3.2266	0.946798	1.578	3.49754	1429	1350	43 × 43	0.71	0.1	20	13	1234.38	60.11	0.78	0.13	25.21	1.1
1528C-45-ol1	93.07	0.0252427	50.06	0.0849546	0.194	0.00619176	6.51	0.0265459	0.93	10.066	0.05884	0.051	0.00491903	25.06	0.0945072	5.29	0.0157105	0.104	0.00897917	0.698	0.0187065	0.022	0.0012474	0.0916	0.0016603	0.019	0.00274564	0.015	0.00115329	99.11	100.11	0.113402	3.59794	0.472165	0.786942	5.15464	1427	1300	52 × 39	1	0.07	38	10	1171.82	52.85	0.43	0.05	20.65	0.67
1528C-45-ol10	93.16	0.0146704	49.89	0.0846661	0.194	0.00605416	6.48	0.025965	0.94	10.052	0.0578104	0.05	0.00487856	25.33	0.0973183	5.26	0.0153734	0.141	0.00875098	0.66	0.0181086	0.025	0.0012299	0.1513	0.00198636	0.017	0.00263568	0.018	0.00116359	99.21	100.17	0.128866	3.40206	0.779897	1.29983	4.94845	1431	1300	30 × 30	0.96	0.14
1528C-45-ol11	93.23	0.00454454	50.06	0.0693652	0.183	0.00488153	6.3	0.0210964	0.96	10.04	0.0459863	0.055	0.00400686	25.72	0.0762272	4.87	0.0121219	0.113	0.00699879	0.694	0.0150839	0.021	0.000972688	0.0936	0.00134981	0.014	0.00209789	0.016	0.000919701	99.13	100.11	0.114754	3.79235	0.511475	0.852459	5.35519	1435	1300	40 × 36	0.98	0.14	38	8	1035.88	46.61	0.41	0.06	20.03	0.76
1528C-45-ol12	92.91	0.0212432	50.14	0.069476	0.193	0.00507887	6.58	0.0218655	0.91	10.181	0.0468938	0.055	0.00416158	24.8	0.0744551	5.27	0.0127791	0.107	0.00761362	0.693	0.015364	0.024	0.00106549	0.1281	0.00155314	0.013	0.00214942	0.017	0.000940721	99.11	100.14	0.124352	3.59067	0.663731	1.10622	5.33679	1422	1300	53 × 40	1.03	0.14
1528C-45-ol13	93.02	0.00368427	50.04	0.0693375	0.196	0.00508532	6.58	0.0217807	0.96	10.14	0.0474855	0.053	0.00409922	25.01	0.0763704	5.35	0.0127671	0.069	0.00713774	0.721	0.0154858	0.033	0.00108799	0.2145	0.00190717	0.017	0.00227947	0.021	0.00096397	99.4	100.23	0.168367	3.67857	1.09439	1.82398	4.23469	1431	1300	54 × 42	0.83	0.12	20	15	1150.75	59.26	0.81	0.07	26.39	1.46
1528C-45-ol14	93.01	0.0115513	50.13	0.0694622	0.187	0.00501438	6.42	0.0214162	0.94	10.154	0.0483327	0.048	0.00410852	25.14	0.0780615	5.22	0.0126578	0.097	0.00724729	0.664	0.0149105	0.021	0.00100344	0.0609	0.00118647	0.015	0.00219283	0.017	0.000924843	99.12	100.08	0.112299	3.5508	0.325668	0.542781	5.13369	1428	1300	44 × 35	0.96	0.13
1528C-45-ol15	93	0.00909664	50.15	0.0694899	0.196	0.00503651	6.5	0.0215159	0.95	10.147	0.0490805	0.049	0.00400248	25.05	0.077134	5.28	0.0126001	0.096	0.00731386	0.689	0.0151251	0.022	0.00101122	0.0998	0.00140081	0.017	0.00220942	0.014	0.000915279	99.26	100.11	0.112245	3.51531	0.509184	0.848639	4.33673	1430	1300	49 × 41	0.85	0.12	38	13	1121.14	48.1	0.52	0.05	20.62	0.62
1528C-45-ol16	92.99	0.00576817	50.14	0.069476	0.189	0.0050343	6.45	0.0215162	0.95	10.149	0.0479183	0.052	0.00405993	25.02	0.0770416	5.32	0.0127642	0.093	0.00729988	0.69	0.0151921	0.031	0.00106715	0.1239	0.00151819	0.016	0.0022604	0.018	0.000961495	99.24	100.15	0.164021	3.65079	0.655556	1.09259	4.81481	1428	1300	50 × 45	0.91	0.13	38	17	1130.98	42.86	0.67	0.05	22.77	0.63
1528C-45-ol17	92.89	0.00264974	50.31	0.0697116	0.192	0.00513171	6.65	0.0220124	0.94	10.156	0.0480813	0.052	0.00410519	24.69	0.0750752	5.32	0.0129003	0.095	0.00735752	0.745	0.01581	0.032	0.00107944	0.1803	0.00178121	0.017	0.00224373	0.019	0.000974642	99.4	100.2	0.166667	3.88021	0.939062	1.5651	4.16667	1427	1300	54 × 54	0.8	0.11	20	12	1156.84	43.61	0.68	0.04	24.19	0.66
1528C-45-ol18	92.77	0.0236845	50.29	0.070335	0.19	0.00541933	6.82	0.0232118	0.9	10.196	0.0480094	0.054	0.00432605	24.39	0.0711239	5.3	0.0134272	0.142	0.00805309	0.733	0.0162654	0.028	0.00111849	0.1558	0.00177258	0.017	0.00251849	0.022	0.00106338	99.24	100.18	0.147368	3.85789	0.82	1.36667	4.94737	1418	1300	34 × 22	0.94	0.13
1528C-45-ol19	92.81	0.0197735	50.45	0.0699056	0.203	0.00521803	6.72	0.0222442	0.94	10.159	0.0479655	0.055	0.00418921	24.41	0.0751633	5.45	0.013146	0.099	0.00742964	0.729	0.0157695	0.035	0.00111436	0.1938	0.00186237	0.018	0.00227812	0.015	0.000956613	99.48	100.21	0.172414	3.59113	0.95468	1.59113	3.59606	1424	1300	67 × 56	0.73	0.1	20	26	1176.51	37.77	0.83	0.05	25.73	0.58
1528C-45-ol2	92.87	0.0113467	50.5	0.0857013	0.194	0.00639259	6.62	0.0271501	0.96	10.133	0.0570826	0.056	0.00519189	24.64	0.0929233	5.45	0.0161857	0.111	0.00930763	0.668	0.0187218	0.027	0.00135052	0.1563	0.00209991	0.016	0.00273515	0.015	0.00121674	99.55	100.17	0.139175	3.4433	0.80567	1.34278	3.19588	1429	1300	37 × 37	0.62	0.09
1528C-45-ol20	93.13	0.00158059	50.28	0.06967	0.188	0.00505362	6.48	0.0216991	0.96	10.036	0.0475132	0.048	0.00409528	25.23	0.0776883	5.22	0.0126578	0.116	0.0073534	0.645	0.0148547	0.018	0.000989632	0.078	0.00129497	0.014	0.00223843	0.014	0.00093463	99.33	100.1	0.0957447	3.43085	0.414894	0.691489	4.09574	1433	1300	31 × 30	0.77	0.08
1528C-45-ol21	93.12	0.0132744	50.28	0.06967	0.191	0.00496526	6.51	0.0213823	0.97	10.03	0.0496727	0.042	0.00394319	25.26	0.0771338	5.11	0.0123911	0.094	0.00707257	0.733	0.0154423	0.017	0.000961823	0.0459	0.00107077	0.014	0.00211823	0.014	0.000932952	99.3	100.06	0.0890052	3.8377	0.240314	0.400524	3.97906	1435	1300	60 × 60	0.76	0.11	20	10	1127.84	65.19	0.28	0.04	18.64	0.9
1528C-45-ol22	93.05	0.0085848	50.01	0.0692959	0.186	0.00491836	6.56	0.021294	0.96	10.139	0.0481312	0.049	0.00392632	25.18	0.0781817	5.28	0.0126001	0.116	0.00709202	0.663	0.0147755	0.019	0.000993284	0.0719	0.00123982	0.015	0.00221188	0.019	0.000942854	99.27	100.1	0.102151	3.56452	0.386559	0.644265	4.46237	1432	1300	35 × 35	0.83	0.12
1528C-45-ol23	93.12	0.00476435	50.19	0.0695453	0.192	0.005018	6.56	0.021462	0.96	10.035	0.048925	0.049	0.00402795	25.22	0.0773352	5.19	0.0125851	0.084	0.00703936	0.707	0.0152767	0.031	0.00106712	0.1602	0.00167513	0.019	0.00218717	0.016	0.000938722	99.41	100.18	0.161458	3.68229	0.834375	1.39062	4.01042	1434	1300	53 × 43	0.77	0.11	38	11	1131.46	57.82	0.71	0.06	21.58	0.74
1528C-45-ol24	92.9	0.0105886	50.32	0.0697254	0.194	0.005063	6.59	0.0216451	0.94	10.156	0.0486028	0.05	0.0040797	24.77	0.0765909	5.33	0.0127194	0.115	0.00726592	0.696	0.0152612	0.017	0.00101744	0.0506	0.0011155	0.015	0.00221243	0.018	0.000981947	99.27	100.07	0.0876289	3.58763	0.260825	0.434708	4.12371	1427	1300	42 × 40	0.8	0.11	38	10	1122.53	52.87	0.33	0.04	19.85	0.75
1528C-45-ol25-i1	93.02	0.00896302	50.18	0.0695314	0.192	0.00502688	6.55	0.0216814	0.96	10.139	0.0483921	0.049	0.00408679	25.1	0.0766452	5.2	0.0126093	0.1	0.00725745	0.704	0.0152921	0.019	0.00100803	0.0706	0.00124281	0.018	0.00215601	0.019	0.0009701	99.3	100.09	0.0989583	3.66667	0.367708	0.612847	4.11458	1432	1300	60 × 50	0.79	0.11
1528C-45-ol25-i2	93.02	0.00896302	50.3	0.0696977	0.188	0.00498713	6.47	0.0214999	0.96	10.137	0.0487717	0.051	0.00401125	25.09	0.0772572	5.22	0.0126578	0.087	0.00713022	0.685	0.0151432	0.019	0.001007	0.0709	0.00123531	0.022	0.00235064	0.021	0.000975167	99.32	100.1	0.101064	3.64362	0.377128	0.628546	4.14894	1431	1300	60 × 50	0.78	0.08	20	16	1094.85	39.52	0.36	0.03	19.68	0.61
1528C-45-ol26	92.79	0.016948	50.39	0.0698224	0.2	0.00520299	6.65	0.0221834	0.92	10.176	0.0480458	0.052	0.00411746	24.42	0.0755087	5.47	0.0130535	0.122	0.00754302	0.684	0.0154396	0.029	0.00109571	0.1735	0.00177192	0.018	0.00229168	0.019	0.0010029	99.33	100.2	0.145	3.42	0.8675	1.44583	4.35	1420	1300	40 × 40	0.87	0.12	38	13	1150.74	51.21	0.6	0.06	23.44	0.9
1528C-45-ol27	92.95	0.00903935	50.15	0.0694899	0.191	0.00509478	6.55	0.0217658	0.94	10.156	0.0476904	0.054	0.00413447	24.86	0.0768692	5.38	0.0128387	0.106	0.00743193	0.689	0.0152854	0.027	0.00104993	0.1639	0.00172435	0.018	0.00216966	0.018	0.00095599	99.31	100.19	0.141361	3.60733	0.858115	1.43019	4.60733	1426	1300	46 × 46	0.88	0.12	38	13	1154.14	49.28	0.61	0.05	23.39	0.77
1528C-45-ol28	93.05	0.0100295	50.22	0.0695869	0.186	0.00495554	6.4	0.0211849	0.96	10.135	0.0483719	0.051	0.00396145	25.25	0.076778	5.16	0.0125123	0.082	0.00700857	0.682	0.0149717	0.021	0.000996121	0.091	0.00134271	0.018	0.00227256	0.018	0.000959522	99.28	100.11	0.112903	3.66667	0.489247	0.815412	4.46237	1432	1300	61 × 61	0.83	0.12	20	17	1095.38	39.76	0.41	0.03	19.7	0.53
1528C-45-ol29-i1	92.92	0.0109642	49.87	0.0846322	0.187	0.00622368	6.57	0.0269468	0.91	10.183	0.0573763	0.051	0.00480598	24.65	0.0941302	5.63	0.016457	0.094	0.00796134	0.704	0.0194064	0.021	0.00128123	0.0914	0.00170456	0.015	0.00355417	0.017	0.00130577	99	100.11	0.112299	3.76471	0.48877	0.814617	5.93583	1420	1300	40 × 40	1.11	0.15
1528C-45-ol3	92.96	0.00186758	50.14	0.069476	0.196	0.00509365	6.61	0.0217956	0.95	10.148	0.0486947	0.05	0.00403398	24.85	0.0777948	5.43	0.0128888	0.09	0.00727617	0.691	0.0152577	0.016	0.000977723	0.0507	0.00112062	0.017	0.0022929	0.021	0.000965169	99.26	100.07	0.0816327	3.52551	0.258673	0.431122	4.13265	1428	1300	61 × 43	0.81	0.11	20	17	1188.94	53.5	0.34	0.04	20.1	0.81
1528C-45-ol30	93.01	0.00188183	50.17	0.0695176	0.192	0.00505082	6.37	0.0214945	0.94	10.155	0.0475557	0.054	0.00405848	25.14	0.0767674	5.2	0.0126764	0.084	0.00714997	0.68	0.0151719	0.021	0.00101567	0.1038	0.00142498	0.014	0.00218788	0.012	0.000893088	99.15	100.12	0.109375	3.54167	0.540625	0.901042	5.05208	1428	1300	55 × 55	0.97	0.14	20	17	1106.17	45.46	0.48	0.04	20.26	0.73
1528C-45-ol31	92.98	0.0111291	50.02	0.0693097	0.194	0.005118	6.43	0.0215317	0.92	10.172	0.0460693	0.057	0.00411887	25	0.0773021	5.34	0.0128122	0.106	0.00743317	0.658	0.0150029	0.024	0.00105554	0.1342	0.00157719	0.016	0.00222429	0.014	0.000925795	99.09	100.15	0.123711	3.39175	0.691753	1.15292	5.46392	1424	1300	40 × 33	1.06	0.15
1528C-45-ol32	93.1	0.0112574	49.81	0.0845304	0.197	0.00622797	6.69	0.0268064	0.92	10.072	0.0567389	0.048	0.00492102	25.05	0.0950764	5.36	0.0156678	0.107	0.00912679	0.704	0.0187506	0.021	0.00123369	0.0969	0.00169297	0.014	0.00297977	0.014	0.00110656	99.1	100.11	0.106599	3.5736	0.491878	0.819797	5.1269	1427	1300	48 × 32	1.01	0.14
1528C-45-ol33	92.78	0.00918729	50.28	0.06967	0.196	0.00519225	6.47	0.0219147	0.89	10.198	0.0471036	0.054	0.00416691	24.64	0.0752406	5.31	0.0129446	0.116	0.0074806	0.67	0.015267	0.02	0.00103233	0.0912	0.00138547	0.015	0.00222583	0.017	0.000992812	98.96	100.1	0.102041	3.41837	0.465306	0.77551	5.81633	1416	1300	42 × 42	1.14	0.16	38	12	1151.29	54.11	0.39	0.04	20.93	0.76
1528C-45-ol34	93.07	0.00647912	50.2	0.0695592	0.191	0.00503289	6.54	0.0216483	0.95	10.049	0.0483483	0.051	0.00407424	25.09	0.0772572	5.28	0.0127359	0.085	0.00710813	0.686	0.0152269	0.026	0.00105186	0.1498	0.00164711	0.015	0.00219602	0.016	0.000919993	99.32	100.17	0.136126	3.59162	0.784293	1.30716	4.45026	1430	1300	53 × 53	0.85	0.12	20	11	1108.25	53.42	0.55	0.09	21.85	0.93
1528C-45-ol35	92.91	0.0149193	50.43	0.0698779	0.197	0.00508548	6.55	0.0217658	0.95	10.144	0.0482851	0.052	0.00410869	24.79	0.0763334	5.3	0.0128518	0.074	0.00709814	0.719	0.0155716	0.024	0.00105292	0.1148	0.00149208	0.019	0.00227269	0.015	0.000936921	99.38	100.13	0.121827	3.64975	0.582741	0.971235	3.80711	1428	1300	77 × 77	0.75	0.11	20	31	1130.84	42.41	0.56	0.05	21.07	0.68
1528C-45-ol36	92.87	0.0105843	50.17	0.0695176	0.192	0.00518176	6.59	0.0220675	0.91	10.186	0.0466562	0.056	0.00422197	24.67	0.0762817	5.4	0.0130254	0.114	0.00743603	0.664	0.0151991	0.026	0.00104455	0.14	0.00162205	0.016	0.00228486	0.015	0.000961114	99.15	100.16	0.135417	3.45833	0.729167	1.21528	5.26042	1420	1300	35 × 28	1.01	0.14
1528C-45-ol37	93.02	0.008538	50.04	0.0849207	0.193	0.00613851	6.43	0.0260677	0.95	10.15	0.0569386	0.052	0.00487457	25.09	0.0969858	5.39	0.0156269	0.111	0.00893343	0.651	0.0181068	0.016	0.00119494	0.0627	0.00145275	0.014	0.00264194	0.016	0.00117449	99.16	100.08	0.0829016	3.37306	0.32487	0.541451	4.76684	1428	1300	35 × 30	0.92	0.13
1528C-45-ol38	92.99	0.005953	50.2	0.0695592	0.198	0.00502265	6.57	0.0215794	0.95	10.149	0.04922	0.046	0.0040551	25.07	0.0765536	5.17	0.0125366	0.081	0.00717194	0.701	0.0152536	0.018	0.0010092	0.0557	0.00115026	0.015	0.00215696	0.013	0.000885322	99.24	100.07	0.0909091	3.5404	0.281313	0.468855	4.19192	1430	1300	49 × 42	0.83	0.12	38	14	1150.46	45.9	0.34	0.03	19.62	0.7
1528C-45-ol39	93	0.0100604	50.32	0.0697254	0.195	0.00503328	6.47	0.0214166	0.97	10.13	0.0491279	0.051	0.00407791	25.08	0.0772264	5.22	0.0125912	0.076	0.00710761	0.707	0.0152224	0.019	0.000978577	0.0917	0.00136375	0.017	0.00215971	0.02	0.000979644	99.36	100.11	0.0974359	3.62564	0.470256	0.783761	3.84615	1432	1300	70 × 70	0.75	0.1	20	21	1130.67	40.25	0.39	0.04	18.74	0.55
1528C-45-ol4	92.71	0.0120327	50.12	0.0694483	0.195	0.00502195	6.47	0.0214166	0.97	10.034	0.0471175	0.049	0.00405603	25.31	0.0769604	5.18	0.0125608	0.105	0.00715311	0.713	0.0152875	0.025	0.0010173	0.1311	0.00156259	0.016	0.00231621	0.02	0.0009661	99.33	100.15	0.128205	3.65641	0.672308	1.12051	4.20513	1434	1300	50 × 50	0.82	0.11	20	17	1117.99	35.44	0.55	0.03	21.52	0.53
1528C-45-ol40	93.15	0.0090442	50.02	0.0693097	0.201	0.00506003	7.14	0.0223523	1.03	10.081	0.0468223	0.052	0.00402373	24.63	0.0777367	5.62	0.0129788	0.054	0.00678428	0.786	0.0159744	0.027	0.00104656	0.1098	0.00144962	0.02	0.00229601	0.013	0.000958052	99.78	100.12	0.134328	3.91045	0.546269	0.910448	1.69154	1443	1300	53 × 45	0.34	0.05	38	13	1186.62	55.42	0.53	0.05	22.43	0.74
1528C-45-ol41	93.13	0.000729706	50.08	0.0693929	0.191	0.00498209	6.49	0.0214828	0.94	10.056	0.0479959	0.05	0.00398247	25.32	0.0769908	5.14	0.0124638	0.083	0.00708609	0.678	0.0149892	0.017	0.000983949	0.0525	0.00112826	0.017	0.00227488	0.012	0.000922114	99.13	100.07	0.0890052	3.54974	0.274869	0.458115	4.92147	1431	1300	40 × 35	0.94	0.13	38	10	1079.5	44.15	0.3	0.04	19.36	0.66
1528C-45-ol42	92.86	0.0161576	50.41	0.0698501	0.196	0.00519352	6.56	0.021967	0.94	10.161	0.0488871	0.05	0.00421708	24.61	0.0767264	5.43	0.0130978	0.092	0.00737934	0.698	0.0154758	0.024	0.00106842	0.1067	0.00146619	0.017	0.00221834	0.02	0.000985899	99.31	100.13	0.122449	3.56122	0.544388	0.907313	4.18367	1424	1300	50 × 50	0.82	0.11	38	14	1138.55	53.97	0.47	0.04	21.42	0.66
1528C-45-ol44	93.06	0.0088301	50.11	0.0694345	0.196	0.00507778	6.63	0.0219462	0.94	10.056	0.0470921	0.053	0.00408436	24.99	0.076634	5.32	0.0128324	0.09	0.00726821	0.709	0.0154646	0.033	0.0010932	0.2104	0.0019059	0.016	0.00220863	0.015	0.000939677	99.36	100.22	0.168367	3.61735	1.07347	1.78912	4.38776	1429	1300	44 × 44	0.86	0.12
1528C-45-ol45	93.13	0.00426178	50.09	0.0694067	0.192	0.00505288	6.41	0.0214647	0.94	10.06	0.0476278	0.05	0.00402523	25.34	0.078031	5.13	0.0125716	0.11	0.00727677	0.651	0.0148093	0.024	0.0010407	0.1159	0.00148701	0.018	0.00226455	0.011	0.000914926	99.13	100.13	0.125	3.39062	0.603646	1.00608	5.20833	1429	1300	31 × 31	1	0.14
1528C-45-ol46	92.89	0.00433457	50.26	0.0696423	0.191	0.00507344	6.73	0.0221049	0.93	10.162	0.0492831	0.047	0.00408151	24.69	0.0760255	5.31	0.0128761	0.091	0.00719006	0.734	0.0157363	0.018	0.00102072	0.048	0.00111355	0.015	0.00215685	0.019	0.000950869	99.25	100.07	0.0942408	3.84293	0.251309	0.418848	4.29319	1426	1300	50 × 50	0.82	0.11	38	12	1101.34	42.73	0.31	0.04	19.23	0.73
1528C-45-ol47-i1	92.89	0.0102802	50.36	0.0697809	0.201	0.00510391	6.63	0.0219462	0.94	10.152	0.0484541	0.052	0.00405418	24.68	0.0763126	5.38	0.0129081	0.078	0.00711034	0.719	0.0155575	0.022	0.00104025	0.0984	0.00141272	0.015	0.00236539	0.015	0.000923516	99.34	100.11	0.109453	3.57711	0.489552	0.81592	3.83085	1427	1300	78 × 62	0.77	0.11	20	21	1185.28	42.67	0.42	0.03	20.93	0.58
1528C-45-ol47-i2	92.89	0.0102802	50.26	0.0696423	0.197	0.00513678	6.71	0.022211	0.93	10.161	0.0478446	0.052	0.0041085	24.68	0.0753627	5.34	0.0128807	0.09	0.00734176	0.726	0.0156208	0.023	0.00104274	0.1	0.0014242	0.017	0.00221587	0.015	0.000966642	99.3	100.12	0.116751	3.68528	0.507614	0.846024	4.16244	1426	1300	57 × 44	0.82	0.11	20	14	1126.78	37.3	0.48	0.04	20.99	0.54
1528C-45-ol48	93.02	0.0108752	50	0.069282	0.196	0.00509219	6.63	0.0219462	0.95	10.143	0.0480197	0.051	0.00400395	25.01	0.0770108	5.35	0.0127671	0.096	0.00719646	0.713	0.0154789	0.025	0.0010259	0.1449	0.0016304	0.015	0.00229316	0.015	0.000948457	99.33	100.16	0.127551	3.63776	0.739286	1.23214	4.23469	1430	1300	48 × 40	0.83	0.12	38	12	1159.89	59.15	0.62	0.05	22.73	0.8
1528C-45-ol49	92.94	0.0194656	50.34	0.0697532	0.195	0.00505411	6.55	0.0216814	0.95	10.147	0.0489503	0.05	0.00405026	24.89	0.0766413	5.23	0.0126821	0.087	0.00715524	0.721	0.0154959	0.023	0.00102755	0.1137	0.00148358	0.015	0.00234574	0.021	0.000994829	99.35	100.13	0.117949	3.69744	0.583077	0.971795	4	1429	1300	67 × 67	0.78	0.11	20	31	1116.42	35.5	0.5	0.03	20.81	0.5
1528C-45-ol5	92.92	0.00851839	49.97	0.0692405	0.2	0.00520979	6.59	0.0220675	0.91	10.188	0.0464032	0.055	0.00422227	24.8	0.0750928	5.36	0.0129973	0.1	0.00750678	0.685	0.015424	0.028	0.00110397	0.1507	0.00167056	0.016	0.00226386	0.013	0.000969216	99.06	100.16	0.14	3.425	0.7535	1.25583	5.5	1421	1300	50 × 35	1.1	0.15	20	10	1134.62	65.92	0.65	0.09	23.21	1.07
1528C-45-ol50	92.94	0.00512982	50.22	0.0695869	0.19	0.00507817	6.56	0.0217145	0.94	10.156	0.0482119	0.048	0.00409197	24.86	0.0765489	5.34	0.0128122	0.1	0.00741241	0.693	0.0153293	0.024	0.00105476	0.1234	0.00152471	0.017	0.00223422	0.014	0.000924074	99.29	100.14	0.126316	3.64737	0.649474	1.08246	4.47368	1427	1300	40 × 35	0.85	0.12
1528C-45-ol51	92.76	0.0112007	50.35	0.069767	0.192	0.00521291	6.65	0.0222684	0.89	10.204	0.045952	0.06	0.00422105	24.43	0.0733443	5.3	0.0130558	0.124	0.00761832	0.69	0.0155898	0.026	0.00106494	0.1405	0.00163318	0.014	0.00213536	0.018	0.00099042	99.08	100.15	0.135417	3.59375	0.731771	1.21962	5.57292	1415	1300	35 × 35	1.07	0.15
1528C-45-ol52	92.93	0.0217009	50.22	0.0695869	0.194	0.00509511	6.69	0.0219735	0.94	10.157	0.047956	0.055	0.00407769	24.79	0.0756986	5.3	0.0127853	0.079	0.00725448	0.72	0.0155474	0.025	0.00106197	0.137	0.00158724	0.014	0.00219014	0.041	0.0017663	99.36	100.18	0.128866	3.71134	0.706186	1.17698	4.2268	1427	1300	50 × 45	0.82	0.11	38	12	1126.85	44.17	0.56	0.05	22.73	0.8
1528C-45-ol6	93.2	0.00821001	50.11	0.0694345	0.194	0.00488883	6.44	0.0211524	0.98	10.018	0.0488421	0.048	0.00390861	25.47	0.0790862	5.14	0.0123982	0.107	0.00723861	0.696	0.0149402	0.019	0.000964529	0.0708	0.00121645	0.015	0.0020794	0.018	0.000934741	99.33	100.09	0.0979381	3.58763	0.364948	0.608247	3.91753	1438	1300	44 × 44	0.76	0.11	38	13	1116.31	43.31	0.39	0.04	20.24	0.65
1528C-45-ol7	92.96	0.00542522	50.19	0.0695453	0.196	0.00512371	6.57	0.0220005	0.93	10.163	0.0481144	0.051	0.00410153	24.95	0.0761872	5.2	0.0128095	0.089	0.00725696	0.709	0.0154648	0.022	0.0010573	0.0988	0.00140836	0.015	0.00230739	0.013	0.00094268	99.2	100.11	0.112245	3.61735	0.504082	0.840136	4.64286	1427	1300	46 × 38	0.91	0.13	38	13	1138.11	50.99	0.41	0.03	20.68	0.82
1528C-45-ol8	93.01	0.0143399	49.94	0.084751	0.21	0.00630126	7.33	0.0279887	1.07	10.038	0.0563103	0.055	0.00503535	24.48	0.0957819	5.76	0.0162917	0.067	0.00870143	0.821	0.0201652	0.036	0.00134649	0.1898	0.0022055	0.019	0.00269782	0.011	0.00112461	100.02	100.2	0.171429	3.90952	0.90381	1.50635	0.857143	1452	1300	55 × 47	0.18	0.03	38	12	1232.85	45.74	0.76	0.05	26.56	0.79
1528C-45-ol9	93.12	0.00514875	49.95	0.084768	0.195	0.00614971	6.45	0.0261488	0.93	10.062	0.0571569	0.053	0.0049045	25.23	0.0957448	5.31	0.0155196	0.112	0.00895116	0.655	0.0181094	0.016	0.00118504	0.0772	0.00155763	0.012	0.00274909	0.015	0.00118249	99.07	100.1	0.0820513	3.35897	0.395897	0.659829	5.28205	1428	1300	32 × 32	1.03	0.14
[truncated: 90 more columns]

## Sheet: Table 5 
Table 5. Subset of post entrapment corrected melt inclusions with accepted Sr isotope compositions with subdivided groups.
Sample-Incluison id	HOST olivine Fo	2SE (abs)	SiO2	2SE (abs)	TiO2	2SE (abs)	Al2O3	2SE (abs)	Fe2O3	FeO	2SE (abs)	MnO	2SE (abs)	MgO	2SE (abs)	CaO	2SE (abs)	Cr2O3	2SE (abs)	Na2O	2SE (abs)	K2O	2SE (abs)	Cl	2SE (abs)	P2O5	2SE (abs)	S	2SE (abs)	Total	Total+H2O	K2O/TiO2	Na2O/TiO2	Cl/TiO2	H2O/TiO2	T_CALC	T exp, oC	Size	H2O	2SD	Spot Size (µm)	Time (s)	Ti	2SE (abs)	Rb	2SE (abs)	Sr	2SE (abs)	Y
1521-45-ol75	94.45	0.0493142	48.69	0.0674668	0.176	0.00436556	6.06	0.0191265	1.22	9.307	0.0493162	0.034	0.00338357	28.55	0.0879112	4.87	0.0112468	0.063	0.00603737	0.534	0.0124079	0.021	0.000876473	0.0545	0.00101599	0.013	0.00188741	0.03	0.000940613	99.63	100.09	0.119318	3.03409	0.309659	2.61364	1490	1300	49 × 35	0.46	0.06	38	13	1059.95	44.94	0.35	0.04	18.8	0.6	4.58
1523B-28-ol153	93.72	0.00292269	49.65	0.0732807	0.181	0.00201915	6	0.00522587	1.07	9.741	0.0292159	0.071	0.0012697	26.67	0.0618274	5.06	0.0190564	0.291	0.00141885	0.594	0.0173549	0.025	0.000813436	0.068	0.00212813	0.017	0.00333462	0.021	0.00105373	99.45	100.09	0.138122	3.28177	0.375691	3.53591	1456	1400	60 × 60	0.64	0.1	38	14	1190.43	201.3	0.39	0.1	21.61	3.83	4.58
1523B-28-ol157	93.49	0.0177702	49.88	0.222765	0.18	0.00180246	5.99	0.0457499	1.04	9.868	0.0850883	0.071	0.00220807	26.26	0.264363	5.07	0.0188763	0.259	0.00345547	0.616	0.00567863	0.024	0.000985337	0.0592	0.000805262	0.022	0.00391854	0.019	0.00137578	99.37	100.08	0.133333	3.42222	0.328889	3.94444	1448	1400	60 × 60	0.71	0.1	38	14	1033.13	203.32	0.32	0.05	19.38	3.37	4.94
1523B-28-ol162	93.58	0.0112025	49.82	0.159868	0.176	0.00439915	5.88	0.0154907	1.09	9.82	0.00731609	0.072	0.00147603	26.51	0.0896684	5.17	0.0382733	0.265	0.0020842	0.584	0.0117409	0.022	0.0010936	0.0648	0.00154402	0.025	0.00549431	0.018	0.000862225	99.52	100.08	0.125	3.31818	0.368182	3.18182	1456	1400	63 × 63	0.56	0.1	38	21	1149.51	175.99	0.44	0.11	21.01	3.36	4.62
1523B-45-ol114	93.67	0.011711	49.78	0.0689772	0.186	0.00469221	6.07	0.0200926	1.05	9.756	0.0471892	0.047	0.00379374	26.59	0.0825597	5.04	0.0120274	0.085	0.00666572	0.643	0.0141401	0.02	0.000965103	0.0737	0.00119711	0.012	0.00198258	0.015	0.000876074	99.37	100.09	0.107527	3.45699	0.396237	3.87097	1454	1300	125 × 71	0.72	0.1	20	11	1066.85	59.96	0.43	0.06	20.04	0.93	4.38
1528C-45-ol42	92.86	0.0161576	50.41	0.0698501	0.196	0.00519352	6.56	0.021967	0.94	10.161	0.0488871	0.05	0.00421708	24.61	0.0767264	5.43	0.0130978	0.092	0.00737934	0.698	0.0154758	0.024	0.00106842	0.1067	0.00146619	0.017	0.00221834	0.02	0.000985899	99.31	100.13	0.122449	3.56122	0.544388	4.18367	1424	1300	50 × 50	0.82	0.11	38	14	1138.55	53.97	0.47	0.04	21.42	0.66	5.09
1522-47-ol11	94.98	0.0051397	48.6	0.0692128	0.16	0.00416865	5.19	0.0177789	1.35	8.887	0.0450392	0.033	0.00302212	30.22	0.0953798	4.42	0.0104914	0.081	0.00562681	0.542	0.0126491	0.018	0.000768174	0.066	0.00106614	0.015	0.00192158	0.007	0.000696944	99.58	100.07	0.1125	3.3875	0.4125	3.0625	1509	1310	59 × 49	0.49	0.07	38	14	962.63	34.27	0.37	0.03	17.96	0.49	4.31
1523B-47-ol10	93.46	0.0391631	50.17	0.0714486	0.186	0.00512689	6.04	0.0213881	1.05	9.853	0.0439921	0.055	0.00385508	26.09	0.0823448	5.17	0.0126696	0.108	0.0071061	0.642	0.0154772	0.02	0.000986301	0.0736	0.00127108	0.016	0.00229159	0.017	0.000893936	99.49	100.09	0.107527	3.45161	0.395699	3.22581	1450	1310	75 × 65	0.6	0.1	38	28	1109.77	40.62	0.43	0.03	20.49	0.45	5.03
1523B-47-ol13	93.67	0.00306141	49.84	0.0709787	0.183	0.00497407	5.91	0.0208522	1.07	9.741	0.0442419	0.049	0.0037375	26.54	0.0851285	5.23	0.0124808	0.124	0.00686964	0.604	0.0146492	0.016	0.000933772	0.0533	0.00111888	0.017	0.00235407	0.013	0.000875341	99.39	100.07	0.0874317	3.30055	0.291257	3.71585	1454	1310	48 × 40	0.68	0.11	38	11	1123.47	48.87	0.37	0.03	20.13	0.55	5.09
2217-48-ol34	93.7321	0.00942097	49.76	0.145436	0.17	0.00644464	5.9	0.0265098	1.05	9.755	0.0450877	0.062	0.00480877	26.79	0.119862	4.9	0.0199337	0.176	0.00944594	0.613	0.0282767	0.022	0.00160344	0.1015	0.00162753	0.018	0.00380237	0.017	0.00238911	99.34	100.12	0.129412	3.60588	0.597059	4.58824	1454	1350	57 × 46	0.78	0.01	38	16	1042.09	38.66	0.43	0.03	19.63	0.42	4.71
2222-48-ol20	95.23	0.0473339	48.77	0.132216	0.156	0.0104104	5.47	0.0332191	1.56	8.502	0.0938384	0.037	0.00402888	30.52	0.665258	4.38	0.0584053	0.106	0.0145578	0.431	0.0158806	0.015	0.00174496	0.0285	0.00101243	0.011	0.00228835	0.008	0.000837759	99.98	100.04	0.0961538	2.76282	0.182692	0.384615	1538	1350	50 × 28	0.06	0.01	38	14	915.93	41.86	0.25	0.02	16.03	0.45	4.12
2222-48-ol21	94.9217	0.0523339	48.82	0.0831668	0.146	0.0073402	5.27	0.0238793	1.31	8.927	0.0599092	0.039	0.00405922	30.15	0.161625	4.23	0.0163938	0.127	0.00989654	0.455	0.0130667	0.017	0.000969397	0.0479	0.0016888	0.012	0.00423946	0.015	0.00119982	99.55	100.06	0.116438	3.11644	0.328082	3.49315	1504	1350	42 × 43	0.51	0.03	38	21	902.03	36.62	0.31	0.02	17	0.35	4.13
2218-48-ol3	94.67	0.0203626	49.18	0.146335	0.179	0.00652297	5.69	0.0218401	1.44	8.905	0.0410177	0.05	0.00690258	28.86	0.193368	4.82	0.0326706	0.163	0.00848167	0.606	0.0287226	0.023	0.00173035	0.0997	0.00190245	0.017	0.00256107	0.013	0.00105041	100.04	100.11	0.128492	3.38547	0.556983	0.391061	1518	1350	48 × 41	0.07	0.09	38	10	1043.09	39.43	0.43	0.04	19.94	0.51	4.63
2217-48-ol65	93.6358	0.0194505	50.14	0.133079	0.174	0.00753738	5.97	0.0365973	1.06	9.746	0.0842054	0.069	0.00470149	26.44	0.128914	5	0.0211323	0.125	0.0141877	0.623	0.0237034	0.02	0.00148732	0.0619	0.00153292	0.014	0.00528006	0.017	0.00180917	99.47	100.08	0.114943	3.58046	0.355747	3.50575	1453	1350	115 × 90	0.61	0.15	38	29	1040.63	13.2807	0.387598	0.0101186	19.7497	0.208697	4.72323
1521-45-ol100	94.78	0.00248552	48.46	0.0671481	0.17	0.00417637	5.75	0.0182221	1.27	9.058	0.0498559	0.032	0.00322661	29.5	0.0919719	4.67	0.0107849	0.064	0.00579863	0.499	0.0117225	0.016	0.000802521	0.0247	0.000785024	0.015	0.00179739	0.012	0.00079586	99.54	100.04	0.0941176	2.93529	0.145294	2.94118	1500	1300	72 × 54	0.5	0.07	20	14	993.62	37.06	0.3	0.03	17.88	0.62	4.4
1521-45-ol101	94.67	0.0301657	48.76	0.0675638	0.169	0.00419582	5.82	0.0184439	1.24	9.089	0.05026	0.032	0.00327212	29.14	0.0908495	4.65	0.0109177	0.063	0.00577645	0.516	0.0119767	0.019	0.00085983	0.0499	0.000964325	0.016	0.0017897	0.014	0.000764248	99.57	100.07	0.112426	3.05325	0.295266	2.95858	1495	1300	47 × 43	0.5	0.07	38	10	1010.72	46.7	0.32	0.05	18.41	0.69	4.61
1521-45-ol59	94.7	0.0389087	48.64	0.0673976	0.168	0.0042032	5.81	0.018561	1.24	9.083	0.0484788	0.037	0.00326602	29.24	0.0904126	4.65	0.0109177	0.052	0.00581641	0.519	0.0119596	0.019	0.000865913	0.0475	0.000951488	0.015	0.00185824	0.017	0.000806392	99.54	100.06	0.113095	3.08929	0.282738	3.09524	1496	1300	80 × 46	0.52	0.07	20	17	979.77	40.56	0.29	0.03	18.19	0.65	4.27
1521-45-ol60	95	0.0166483	48.4	0.067065	0.163	0.00407179	5.61	0.0177784	1.29	8.837	0.0487531	0.032	0.00315764	30.08	0.0937802	4.5	0.0104504	0.054	0.00547311	0.475	0.0113306	0.017	0.000793978	0.0501	0.000935426	0.016	0.00178011	0.008	0.00070469	99.54	100.06	0.104294	2.91411	0.307362	3.19018	1506	1300	62 × 47	0.52	0.07	20	8	945.19	43.67	0.36	0.04	18.17	0.76	4.5
1521-45-ol61	95.08	0.0478864	48.29	0.0669126	0.16	0.00398662	5.49	0.0174686	1.35	8.789	0.0488266	0.033	0.00307809	30.38	0.0943273	4.43	0.0102878	0.067	0.00572664	0.506	0.0115178	0.022	0.000826834	0.0938	0.00115897	0.016	0.00183927	0.012	0.000762366	99.64	100.11	0.1375	3.1625	0.58625	2.9375	1513	1300	75 × 65	0.47	0.07	20	19	962.32	38.69	0.4	0.03	18.86	0.65	4.12
1521-45-ol63	94.79	0.0222679	48.34	0.0669819	0.162	0.00417011	5.45	0.0178305	1.21	9.111	0.0507323	0.034	0.00321405	29.83	0.0899406	4.42	0.0105478	0.089	0.00592487	0.458	0.0113239	0.018	0.000824701	0.083	0.00114159	0.013	0.00173008	0.014	0.000788795	99.23	100.1	0.111111	2.82716	0.512346	5.37037	1492	1300	53 × 53	0.87	0.12	38	15	941.65	34.75	0.36	0.03	17.28	0.61	4.21
1521-45-ol66	94.95	0.0121397	48.46	0.0822393	0.159	0.00487202	5.55	0.0214552	1.33	8.906	0.0602464	0.031	0.00371491	30.11	0.115701	4.46	0.0126148	0.053	0.00681812	0.474	0.0136421	0.016	0.00096696	0.0321	0.000999378	0.012	0.00203294	0.015	0.000913944	99.61	100.05	0.100629	2.98113	0.201887	2.7673	1509	1300	63 × 43	0.44	0.06	20	12	981.13	44.84	0.31	0.04	17.85	0.72	4.02
1521-45-ol67	94.71	0.0134767	48.65	0.0674114	0.171	0.00417131	5.89	0.0185899	1.25	9.074	0.0481977	0.035	0.00325157	29.27	0.0897543	4.56	0.0107064	0.069	0.00565247	0.541	0.012197	0.018	0.000820552	0.0484	0.000948272	0.014	0.00182962	0.015	0.000775661	99.6	100.06	0.105263	3.16374	0.283041	2.69006	1498	1300	50 × 34	0.46	0.06	38	16	985.89	36.68	0.3	0.03	17.94	0.52	4.48
1521-45-ol68	94.13	0.053631	49.36	0.0683952	0.178	0.0045291	5.99	0.0194438	1.15	9.466	0.0485798	0.038	0.00368161	27.76	0.0865471	4.92	0.0115516	0.07	0.00633567	0.531	0.0126798	0.02	0.00089906	0.0622	0.00108627	0.015	0.00199067	0.017	0.000846227	99.58	100.08	0.11236	2.98315	0.349438	2.80899	1476	1300	54 × 43	0.5	0.07	20	11	1020.07	57.74	0.36	0.07	18.96	0.91	4.63
1521-45-ol69	95.02	0.0253196	48.41	0.0670789	0.164	0.00406118	5.6	0.0176746	1.32	8.811	0.0495138	0.033	0.0031091	30.12	0.0931336	4.5	0.0103923	0.048	0.00556875	0.502	0.0114838	0.021	0.000836888	0.0729	0.0010672	0.015	0.00182858	0.01	0.000753377	99.64	100.09	0.128049	3.06098	0.444512	2.7439	1510	1300	50 × 50	0.45	0.06	20	12	941.87	47.56	0.43	0.05	18.97	0.81	4.37
1521-45-ol71-i1	95.12	0.0133119	48.29	0.0669126	0.157	0.00396271	5.35	0.0171604	1.35	8.784	0.0499258	0.031	0.00306006	30.72	0.0934107	4.27	0.0100255	0.063	0.00551088	0.443	0.0107195	0.014	0.000780927	0.0261	0.00077761	0.013	0.00170569	0.011	0.000702422	99.53	100.04	0.089172	2.82166	0.166242	3.24841	1514	1300	75 × 58	0.51	0.07	20	8	918.37	39.12	0.23	0.03	16.15	0.51	4.06
1521-45-ol80	94.39	0.0659482	48.99	0.0831388	0.178	0.00532998	5.87	0.0231061	1.19	9.331	0.059822	0.041	0.0041637	28.53	0.108938	4.79	0.013774	0.056	0.00755218	0.474	0.0143693	0.016	0.00104985	0.0403	0.00113606	0.015	0.0022993	0.018	0.00102249	99.54	100.06	0.0898876	2.66292	0.226404	2.92135	1485	1300	63 × 63	0.52	0.07	20	10	1017.74	58.32	0.28	0.05	18.64	0.83	4.54
1521-45-ol82	94.79	0.0535646	48.48	0.0671759	0.172	0.00421134	5.67	0.0181138	1.28	9.051	0.0502829	0.034	0.00326597	29.53	0.0928294	4.69	0.0107713	0.052	0.00567322	0.505	0.0117344	0.02	0.00084576	0.0793	0.00111416	0.015	0.00191473	0.012	0.000761162	99.59	100.09	0.116279	2.93605	0.461047	2.90698	1501	1300	63 × 42	0.5	0.07	20	17	996.05	30.48	0.36	0.03	18.24	0.43	4.28
1521-45-ol83	95.07	0.00606106	48.23	0.0668294	0.17	0.00406362	5.6	0.0176746	1.34	8.796	0.0487524	0.03	0.00320234	30.31	0.0944972	4.48	0.0104039	0.066	0.00572457	0.495	0.011508	0.019	0.000797419	0.0495	0.000924847	0.017	0.00179636	0.01	0.000738223	99.61	100.06	0.111765	2.91176	0.291176	2.64706	1513	1300	70 × 46	0.45	0.06
1521-45-ol85	94.95	0.0229448	48.33	0.066968	0.169	0.00408986	5.55	0.0177304	1.29	8.939	0.0501187	0.031	0.0031255	30.12	0.0927455	4.44	0.0104246	0.071	0.00569723	0.466	0.0112185	0.014	0.000784461	0.0257	0.000782435	0.014	0.0017735	0.012	0.000740956	99.47	100.04	0.0828402	2.7574	0.152071	3.37278	1505	1300	57 × 48	0.57	0.08
1521-45-ol86	94.64	0.0172539	48.55	0.0672729	0.173	0.00424636	5.79	0.0184971	1.24	9.183	0.0491309	0.034	0.00326248	29.15	0.0908807	4.74	0.0109466	0.066	0.0058276	0.502	0.0118131	0.02	0.000840616	0.092	0.00120168	0.018	0.00190636	0.012	0.000790434	99.58	100.1	0.115607	2.90173	0.531792	3.00578	1495	1300	55 × 40	0.52	0.07	20	12	1044.71	72.61	0.42	0.06	18.38	1.08	4.31
1521-45-ol87	94.81	0.0347103	48.49	0.0671897	0.164	0.00412474	5.65	0.0179777	1.29	9.044	0.0498951	0.031	0.00320579	29.71	0.0926266	4.55	0.0106248	0.056	0.00572676	0.492	0.0115394	0.019	0.000809706	0.0565	0.000990936	0.015	0.00176149	0.013	0.000749603	99.57	100.07	0.115854	3	0.344512	3.04878	1502	1300	57 × 31	0.5	0.07	20	10	943.47	48.78	0.39	0.07	17.94	0.79	4.23
1521-45-ol88	95.05	0.00282567	48.17	0.0667463	0.167	0.00404792	5.7	0.0178443	1.32	8.812	0.049181	0.029	0.00310468	30.1	0.0950058	4.63	0.0105153	0.061	0.00554266	0.501	0.0115464	0.016	0.000817378	0.0297	0.000803882	0.015	0.0017983	0.01	0.00075215	99.57	100.04	0.0958084	3	0.177844	2.81437	1510	1300	74 × 36	0.47	0.07
1521-45-ol90	94.59	0.0115107	48.85	0.0676885	0.166	0.00418317	5.71	0.0182416	1.24	9.19	0.0496394	0.034	0.00327995	29.14	0.0897279	4.58	0.0107533	0.07	0.0058352	0.486	0.0116551	0.016	0.000812254	0.0338	0.000861746	0.014	0.00182436	0.015	0.000820528	99.54	100.05	0.0963855	2.92771	0.203614	3.07229	1493	1300	66 × 38	0.51	0.07	20	10	1028	49.14	0.32	0.06	17.31	0.83	4.18
1521-45-ol92	94.92	0.00900818	48.57	0.0673006	0.165	0.00413033	5.68	0.0180003	1.35	8.889	0.0493821	0.032	0.00316096	29.86	0.0915635	4.56	0.0106482	0.071	0.0057452	0.486	0.0114856	0.015	0.000832752	0.0247	0.000783031	0.017	0.00191097	0.015	0.000796888	99.72	100.04	0.0909091	2.94545	0.149697	1.93939	1511	1300	49 × 38	0.32	0.04	38	12	963.35	35.74	0.26	0.03	17.35	0.53	4.28
1521-45-ol94	95.04	0.0325579	48.17	0.0667463	0.167	0.00403703	5.65	0.0177602	1.31	8.82	0.0489988	0.031	0.0031343	30.12	0.0950642	4.65	0.0105597	0.059	0.00554199	0.481	0.0112996	0.013	0.000768788	0.0255	0.000769336	0.015	0.00178104	0.011	0.000723636	99.52	100.03	0.0778443	2.88024	0.152695	3.05389	1509	1300	50 × 35	0.51	0.07	38	11	1010.36	39.2	0.25	0.03	17.83	0.55	4.36
1521-45-ol95	94.78	0.0339458	48.42	0.0670927	0.163	0.00415794	5.74	0.0181904	1.26	9.068	0.0492129	0.033	0.00325597	29.54	0.0917192	4.63	0.0106925	0.058	0.00572521	0.505	0.0117209	0.017	0.000833839	0.0278	0.000812919	0.015	0.00186333	0.011	0.000723666	99.49	100.04	0.104294	3.09816	0.170552	3.37423	1499	1300	50 × 45	0.55	0.08	20	9	947.17	51.05	0.26	0.04	17.21	0.82	4.1
1523B-28-ol133	93.7	0.00681251	49.66	0.176012	0.181	0.00181197	5.88	0.0303459	1.08	9.727	0.00135281	0.069	0.00341372	26.57	0.305455	5.29	0.0696009	0.289	0.00912988	0.593	0.00165266	0.026	9.58789e-05	0.0785	0.00152232	0.022	0.000222347	0.02	0.00131402	99.48	100.1	0.143646	3.27624	0.433702	3.42541	1456	1400	54 × 54	0.62	0.1	38	19	1064.18	167.71	0.51	0.09	19.7	3.22	4.71
1523B-45-ol106	93.51	0.0261597	49.71	0.0688802	0.186	0.00490047	6.05	0.02057	1	9.901	0.0472551	0.052	0.00392088	26.31	0.0800011	5.02	0.0122376	0.115	0.00703624	0.652	0.0146558	0.021	0.000967828	0.0921	0.00131281	0.019	0.00221164	0.016	0.000936274	99.14	100.11	0.112903	3.50538	0.495161	5.21505	1444	1300	50 × 50	0.97	0.14
1523B-45-ol107	93.82	0.00726491	49.56	0.0686724	0.18	0.00469077	6.03	0.0199602	1.09	9.721	0.0483919	0.043	0.00372629	27.07	0.083354	4.9	0.0116933	0.094	0.00664322	0.629	0.0138736	0.02	0.000921946	0.079	0.00121945	0.014	0.00199922	0.013	0.000874315	99.43	100.09	0.111111	3.49444	0.438889	3.66667	1462	1300	57 × 42	0.66	0.09
1523B-45-ol108	93.56	0.0116321	49.69	0.0688525	0.185	0.00484585	6.15	0.0203574	1.04	9.867	0.0470928	0.049	0.00385694	26.33	0.0814146	5.13	0.0121767	0.087	0.00669235	0.664	0.0145431	0.02	0.00097347	0.0563	0.00110958	0.019	0.00218176	0.014	0.000886896	99.31	100.07	0.108108	3.58919	0.304324	4.10811	1450	1300	51 × 42	0.76	0.11	38	16	1104.23	44.94	0.38	0.03	20.21	0.6	5.04
1523B-45-ol111	93.7	0.00510396	49.57	0.069328	0.184	0.00505025	6.11	0.0211059	1.04	9.771	0.0472638	0.052	0.0040263	26.66	0.0775989	4.99	0.0124961	0.092	0.00716491	0.669	0.0149863	0.02	0.00103654	0.051	0.00110831	0.015	0.00231187	0.014	0.000913462	99.23	100.07	0.108696	3.63587	0.277174	4.56522	1452	1300	45 × 36	0.84	0.12	38	11	1065.73	55.84	0.38	0.04	19.39	0.63	4.74
1523B-45-ol116	93.45	0.00530983	49.87	0.0691019	0.195	0.00499727	6.23	0.0209422	1.02	9.886	0.0474375	0.052	0.00396069	25.99	0.0806967	5.21	0.0125002	0.085	0.00711499	0.674	0.0148912	0.019	0.000985071	0.0368	0.000997931	0.019	0.00216003	0.011	0.000868799	99.3	100.05	0.0974359	3.45641	0.188718	3.84615	1446	1300	50 × 45	0.75	0.11
1523B-45-ol120	93.51	0.0101181	49.76	0.0689495	0.198	0.0049029	6.45	0.020937	1.07	9.844	0.0476149	0.048	0.00386432	26	0.0820607	5.32	0.0124908	0.078	0.00670388	0.701	0.0149031	0.02	0.000955101	0.0555	0.00109462	0.014	0.00217136	0.016	0.00089263	99.57	100.07	0.10101	3.5404	0.280303	2.52525	1454	1300	50 × 38	0.5	0.07	38	13	1158.4	47.15	0.39	0.03	21.77	0.62	4.99
1523B-45-ol121	93.68	0.00918982	49.86	0.069088	0.187	0.00483673	6.02	0.0203135	1.06	9.748	0.0446489	0.054	0.0038831	26.63	0.0830241	5.06	0.0121404	0.052	0.00663812	0.614	0.0141255	0.021	0.000962521	0.0754	0.0012044	0.017	0.00211026	0.016	0.000894629	99.41	100.09	0.112299	3.28342	0.403209	3.63636	1455	1300	99 × 94	0.68	0.09	20	33	1095.54	31.22	0.43	0.02	20.11	0.47	4.51
1523B-45-ol123	93.56	0.0171378	49.86	0.069088	0.182	0.0048409	6.03	0.0204243	1.05	9.861	0.0463051	0.051	0.0039112	26.42	0.0820318	5.05	0.0122456	0.076	0.00673476	0.648	0.0144926	0.019	0.000957001	0.05	0.00105883	0.015	0.00216011	0.018	0.000931887	99.32	100.06	0.104396	3.56044	0.274725	4.06593	1451	1300	78 × 66	0.74	0.1	20	21	1068.9	30.04	0.38	0.02	19.77	0.39	4.57
1523B-45-ol127	93.67	0.0150379	49.67	0.0688248	0.188	0.00480267	6.17	0.020503	1.05	9.761	0.0463368	0.05	0.00393038	26.5	0.0815988	5.11	0.0121944	0.083	0.00691083	0.662	0.0145617	0.022	0.000965202	0.0701	0.00119189	0.016	0.00211647	0.013	0.000894056	99.36	100.09	0.117021	3.52128	0.372872	3.88298	1453	1300	78 × 53	0.73	0.1	20	8	1084.5	50.54	0.45	0.05	20.37	0.85	4.72
1523B-45-ol132	93.32	0.00713639	50.08	0.0693929	0.19	0.00487316	6.19	0.020728	1.01	9.989	0.0463939	0.054	0.00392486	25.77	0.079351	5.21	0.012433	0.1	0.00706604	0.654	0.0145855	0.02	0.00100112	0.0463	0.00106994	0.018	0.00222592	0.02	0.000953777	99.35	100.07	0.105263	3.44211	0.243684	3.78947	1442	1300	73 × 50	0.72	0.07	20	19	1103.77	35.43	0.35	0.03	19.6	0.57	4.64
1523B-45-ol133	93.71	0.00999722	49.67	0.0688248	0.184	0.00477122	6.1	0.0201919	1.06	9.751	0.0469145	0.049	0.00378379	26.7	0.0822147	5.04	0.0120274	0.069	0.00640362	0.628	0.0140203	0.017	0.000928108	0.0409	0.000991359	0.016	0.00200628	0.012	0.000855631	99.33	100.05	0.0923913	3.41304	0.222283	3.91304	1455	1300	62 × 62	0.72	0.1	20	13	1109.41	39.94	0.33	0.03	19.61	0.51	4.56
1523B-45-ol135-i1	93.38	0.0121865	49.96	0.0847849	0.191	0.00604253	6.19	0.0253865	0.99	9.91	0.0583952	0.048	0.00482604	25.85	0.098705	5.23	0.0152858	0.096	0.00859851	0.65	0.0179122	0.019	0.00120206	0.0497	0.00130754	0.018	0.0027709	0.014	0.00113217	99.21	100.07	0.0994764	3.40314	0.260209	4.50262	1440	1300	43 × 35	0.86	0.12	38	12	1122.62	44.57	0.37	0.03	20.38	0.74	5.1
1523B-45-ol136	93.59	0.00774118	49.81	0.0709877	0.189	0.00492069	6.17	0.0213132	1.02	9.782	0.0466872	0.05	0.00390795	26.32	0.0845564	5.06	0.0122053	0.101	0.00714246	0.678	0.0155682	0.019	0.000983968	0.0527	0.00108321	0.016	0.00220832	0.017	0.000848563	99.29	100.07	0.100529	3.5873	0.278836	4.12698	1449	1300	46 × 46	0.78	0.11	38	16	1084.85	43.07	0.34	0.03	19.81	0.55	4.92
1523B-45-ol137	93.78	0.00911339	49.46	0.0685338	0.19	0.00475117	6.07	0.020015	1.07	9.739	0.0473589	0.044	0.00368504	26.85	0.0837143	5.1	0.0119753	0.081	0.0064027	0.64	0.0140428	0.023	0.000959749	0.0884	0.00126925	0.015	0.00206739	0.014	0.000893054	99.37	100.11	0.121053	3.36842	0.465263	3.89474	1458	1300	48 × 41	0.74	0.1	38	12	1078.81	45.31	0.42	0.04	21.14	0.77	4.69
1523B-45-ol139	93.69	0.0115472	49.74	0.0689218	0.181	0.00472821	6.03	0.0201152	1.05	9.757	0.04782	0.046	0.00384453	26.64	0.0827149	5.06	0.0120751	0.086	0.00673697	0.622	0.0140376	0.019	0.000947523	0.0525	0.00105618	0.017	0.00203147	0.011	0.000860059	99.31	100.07	0.104972	3.43646	0.290055	4.1989	1453	1300	60 × 41	0.76	0.11	20	16	1100.88	41.06	0.38	0.04	20.18	0.67	4.6
1523B-45-ol145-i1	93.49	0.00938727	49.88	0.0691158	0.189	0.00491535	6.12	0.0204936	1.02	9.884	0.0469207	0.053	0.00390017	26.18	0.0806135	5.1	0.0121705	0.081	0.00671005	0.657	0.0144495	0.023	0.000989504	0.0735	0.0012184	0.019	0.00218789	0.015	0.000910744	99.29	100.09	0.121693	3.47619	0.388889	4.2328	1446	1300	71 × 48	0.8	0.11	20	17	1094.66	35.58	0.43	0.03	20.72	0.54	4.56
1523B-45-ol146	93.36	0.0125191	49.84	0.0690603	0.195	0.00504168	6.35	0.0211012	0.98	9.922	0.045064	0.06	0.00409122	25.73	0.0792279	5.25	0.0125285	0.086	0.00687426	0.67	0.0148461	0.022	0.000996113	0.0891	0.00132838	0.017	0.00221835	0.019	0.000930762	99.23	100.11	0.112821	3.4359	0.456923	4.51282	1439	1300	87 × 72	0.88	0.12	20	20	1150.35	36.35	0.47	0.03	21.9	0.53	5.08
1523B-45-ol157	93.82	0.00495212	49.64	0.0687832	0.182	0.00458879	5.91	0.0195629	1.1	9.717	0.047499	0.047	0.00377897	27.1	0.0837955	4.9	0.0116933	0.072	0.00650042	0.634	0.0139179	0.019	0.000948555	0.0483	0.00103117	0.014	0.002076	0.011	0.000814447	99.39	100.06	0.104396	3.48352	0.265385	3.68132	1462	1300		0.67	0.09
1528C-44-ol13	93	0.0031785	50.36	0.0854638	0.19	0.0066345	6.53	0.027551	1	10.099	0.0547482	0.062	0.00562677	24.96	0.0823638	5.32	0.016552	0.182	0.0100399	0.716	0.0194589	0.026	0.00144404	0.1024	0.00187057	0.015	0.00286268	0.021	0.00122088	99.59	100.13	0.136842	3.76842	0.538947	2.84211	1437	1350	76 × 76	0.54	0.08
1528C-44-ol26	93.06	0.00316886	50.21	0.0852092	0.192	0.00671438	6.34	0.0271972	0.95	10.05	0.0518774	0.07	0.00580134	25.05	0.0838749	5.43	0.0167667	0.167	0.0102106	0.623	0.0185074	0.025	0.00141245	0.1248	0.00200347	0.018	0.00281586	0.021	0.00124308	99.27	100.15	0.130208	3.24479	0.65	4.58333	1428	1350	60 × 60	0.88	0.12	20	17	1127.3	49.26	0.53	0.05	21.5	0.77	5.02
1528C-44-ol33	93.12	0.00321825	50.12	0.0850565	0.194	0.00670849	6.48	0.0274923	0.98	10.022	0.0543308	0.064	0.00564133	25.15	0.0829908	5.4	0.0165463	0.199	0.0104504	0.666	0.0188849	0.031	0.00147679	0.1633	0.00220939	0.015	0.00286833	0.021	0.00122358	99.49	100.18	0.159794	3.43299	0.841753	3.5567	1435	1350	66 × 66	0.69	0.1
1528C-44-ol35	92.79	0.00310869	50.36	0.0854638	0.195	0.00663722	6.55	0.0273266	0.93	10.167	0.0508056	0.072	0.00565788	24.35	0.0849501	5.66	0.0168093	0.209	0.0101464	0.663	0.0188513	0.028	0.00143219	0.2103	0.00246858	0.017	0.00283094	0.021	0.00123227	99.42	100.23	0.14359	3.4	1.07846	4.15385	1420	1350	59 × 59	0.81	0.11
1528C-44-ol36	93.05	0.00325775	50.36	0.0854638	0.181	0.00653197	6.38	0.027068	1.01	10.097	0.0547374	0.06	0.00541862	25.19	0.0831228	5.24	0.0163031	0.17	0.0095846	0.698	0.0189363	0.02	0.00140287	0.068	0.00161247	0.014	0.00300038	0.019	0.00121432	99.5	100.09	0.110497	3.85635	0.375691	3.25967	1438	1350	88 × 88	0.59	0.08	20	12	1069.51	44.06	0.38	0.07	18.92	0.79	4.64
1528C-44-ol37-i2	93.02	0.00313306	50.11	0.0850395	0.181	0.00640433	6.48	0.0270345	0.95	10.145	0.0549976	0.064	0.00549377	25.1	0.0828258	5.18	0.0161164	0.147	0.00956108	0.718	0.0191405	0.027	0.00138225	0.1275	0.00197448	0.018	0.00277984	0.02	0.00123967	99.27	100.15	0.149171	3.96685	0.70442	4.86188	1430	1350	69 × 69	0.88	0.12
1528C-44-ol41	92.93	0.00560371	50.19	0.0583608	0.191	0.00452059	6.54	0.018909	0.93	10.165	0.0367373	0.059	0.00372703	24.89	0.0559299	5.2	0.0109492	0.199	0.0069585	0.698	0.0133055	0.019	0.000907904	0.0702	0.00108566	0.017	0.00201986	0.02	0.000865678	99.19	100.09	0.0994764	3.65445	0.367539	4.71204	1425	1350	57 × 40	0.9	0.13	20	14	1134.26	53.54	0.39	0.05	20.2	0.94	4.81
1528C-45-ol1	93.07	0.0252427	50.06	0.0849546	0.194	0.00619176	6.51	0.0265459	0.93	10.066	0.05884	0.051	0.00491903	25.06	0.0945072	5.29	0.0157105	0.104	0.00897917	0.698	0.0187065	0.022	0.0012474	0.0916	0.0016603	0.019	0.00274564	0.015	0.00115329	99.11	100.11	0.113402	3.59794	0.472165	5.15464	1427	1300	52 × 39	1	0.07	38	10	1171.82	52.85	0.43	0.05	20.65	0.67	5.18
1528C-45-ol21	93.12	0.0132744	50.28	0.06967	0.191	0.00496526	6.51	0.0213823	0.97	10.03	0.0496727	0.042	0.00394319	25.26	0.0771338	5.11	0.0123911	0.094	0.00707257	0.733	0.0154423	0.017	0.000961823	0.0459	0.00107077	0.014	0.00211823	0.014	0.000932952	99.3	100.06	0.0890052	3.8377	0.240314	3.97906	1435	1300	60 × 60	0.76	0.11	20	10	1127.84	65.19	0.28	0.04	18.64	0.9	4.7
1528C-45-ol25-i2	93.02	0.00896302	50.3	0.0696977	0.188	0.00498713	6.47	0.0214999	0.96	10.137	0.0487717	0.051	0.00401125	25.09	0.0772572	5.22	0.0126578	0.087	0.00713022	0.685	0.0151432	0.019	0.001007	0.0709	0.00123531	0.022	0.00235064	0.021	0.000975167	99.32	100.1	0.101064	3.64362	0.377128	4.14894	1431	1300	60 × 50	0.78	0.08	20	16	1094.85	39.52	0.36	0.03	19.68	0.61	4.68
1528C-45-ol28	93.05	0.0100295	50.22	0.0695869	0.186	0.00495554	6.4	0.0211849	0.96	10.135	0.0483719	0.051	0.00396145	25.25	0.076778	5.16	0.0125123	0.082	0.00700857	0.682	0.0149717	0.021	0.000996121	0.091	0.00134271	0.018	0.00227256	0.018	0.000959522	99.28	100.11	0.112903	3.66667	0.489247	4.46237	1432	1300	61 × 61	0.83	0.12	20	17	1095.38	39.76	0.41	0.03	19.7	0.53	4.59
1528C-45-ol3	92.96	0.00186758	50.14	0.069476	0.196	0.00509365	6.61	0.0217956	0.95	10.148	0.0486947	0.05	0.00403398	24.85	0.0777948	5.43	0.0128888	0.09	0.00727617	0.691	0.0152577	0.016	0.000977723	0.0507	0.00112062	0.017	0.0022929	0.021	0.000965169	99.26	100.07	0.0816327	3.52551	0.258673	4.13265	1428	1300	61 × 43	0.81	0.11	20	17	1188.94	53.5	0.34	0.04	20.1	0.81	4.93
1528C-45-ol30	93.01	0.00188183	50.17	0.0695176	0.192	0.00505082	6.37	0.0214945	0.94	10.155	0.0475557	0.054	0.00405848	25.14	0.0767674	5.2	0.0126764	0.084	0.00714997	0.68	0.0151719	0.021	0.00101567	0.1038	0.00142498	0.014	0.00218788	0.012	0.000893088	99.15	100.12	0.109375	3.54167	0.540625	5.05208	1428	1300	55 × 55	0.97	0.14	20	17	1106.17	45.46	0.48	0.04	20.26	0.73	4.55
1528C-45-ol33	92.78	0.00918729	50.28	0.06967	0.196	0.00519225	6.47	0.0219147	0.89	10.198	0.0471036	0.054	0.00416691	24.64	0.0752406	5.31	0.0129446	0.116	0.0074806	0.67	0.015267	0.02	0.00103233	0.0912	0.00138547	0.015	0.00222583	0.017	0.000992812	98.96	100.1	0.102041	3.41837	0.465306	5.81633	1416	1300	42 × 42	1.14	0.16	38	12	1151.29	54.11	0.39	0.04	20.93	0.76	4.99
1528C-45-ol39	93	0.0100604	50.32	0.0697254	0.195	0.00503328	6.47	0.0214166	0.97	10.13	0.0491279	0.051	0.00407791	25.08	0.0772264	5.22	0.0125912	0.076	0.00710761	0.707	0.0152224	0.019	0.000978577	0.0917	0.00136375	0.017	0.00215971	0.02	0.000979644	99.36	100.11	0.0974359	3.62564	0.470256	3.84615	1432	1300	70 × 70	0.75	0.1	20	21	1130.67	40.25	0.39	0.04	18.74	0.55	4.62
1528C-45-ol40	93.15	0.0090442	50.02	0.0693097	0.201	0.00506003	7.14	0.0223523	1.03	10.081	0.0468223	0.052	0.00402373	24.63	0.0777367	5.62	0.0129788	0.054	0.00678428	0.786	0.0159744	0.027	0.00104656	0.1098	0.00144962	0.02	0.00229601	0.013	0.000958052	99.78	100.12	0.134328	3.91045	0.546269	1.69154	1443	1300	53 × 45	0.34	0.05	38	13	1186.62	55.42	0.53	0.05	22.43	0.74	5.11
1528C-45-ol41	93.13	0.000729706	50.08	0.0693929	0.191	0.00498209	6.49	0.0214828	0.94	10.056	0.0479959	0.05	0.00398247	25.32	0.0769908	5.14	0.0124638	0.083	0.00708609	0.678	0.0149892	0.017	0.000983949	0.0525	0.00112826	0.017	0.00227488	0.012	0.000922114	99.13	100.07	0.0890052	3.54974	0.274869	4.92147	1431	1300	40 × 35	0.94	0.13	38	10	1079.5	44.15	0.3	0.04	19.36	0.66	4.79
1528C-45-ol47-i1	92.89	0.0102802	50.36	0.0697809	0.201	0.00510391	6.63	0.0219462	0.94	10.152	0.0484541	0.052	0.00405418	24.68	0.0763126	5.38	0.0129081	0.078	0.00711034	0.719	0.0155575	0.022	0.00104025	0.0984	0.00141272	0.015	0.00236539	0.015	0.000923516	99.34	100.11	0.109453	3.57711	0.489552	3.83085	1427	1300	78 × 62	0.77	0.11	20	21	1185.28	42.67	0.42	0.03	20.93	0.58	4.6
1528C-45-ol47-i2	92.89	0.0102802	50.26	0.0696423	0.197	0.00513678	6.71	0.022211	0.93	10.161	0.0478446	0.052	0.0041085	24.68	0.0753627	5.34	0.0128807	0.09	0.00734176	0.726	0.0156208	0.023	0.00104274	0.1	0.0014242	0.017	0.00221587	0.015	0.000966642	99.3	100.12	0.116751	3.68528	0.507614	4.16244	1426	1300	57 × 44	0.82	0.11	20	14	1126.78	37.3	0.48	0.04	20.99	0.54	4.79
1528C-45-ol6	93.2	0.00821001	50.11	0.0694345	0.194	0.00488883	6.44	0.0211524	0.98	10.018	0.0488421	0.048	0.00390861	25.47	0.0790862	5.14	0.0123982	0.107	0.00723861	0.696	0.0149402	0.019	0.000964529	0.0708	0.00121645	0.015	0.0020794	0.018	0.000934741	99.33	100.09	0.0979381	3.58763	0.364948	3.91753	1438	1300	44 × 44	0.76	0.11	38	13	1116.31	43.31	0.39	0.04	20.24	0.65	4.93
1521-47-ol2	94.4	0.0361043	49.1	0.0699248	0.166	0.00451543	5.64	0.0194654	1.19	9.328	0.0460765	0.037	0.00340811	28.72	0.0895401	4.58	0.011165	0.101	0.00619653	0.516	0.0130517	0.017	0.000818134	0.0853	0.00123668	0.015	0.00212123	0.015	0.000879108	99.51	100.1	0.10241	3.10843	0.513855	3.55422	1484	1310	46 × 38	0.59	0.03	38	11	1030.91	38.87	0.4	0.03	18.01	0.54	4.52
1522-34-ol50	94.89	0.0293267	48.62	0.0848028	0.159	0.00502602	5.38	0.0218109	1.28	8.949	0.0601154	0.028	0.00357992	29.85	0.122421	4.42	0.01271	0.045	0.00663214	0.614	0.0160786	0.013	0.000866208	0.0295	0.00100409	0.011	0.00220264	0.013	0.000903786	99.41	100.04	0.081761	3.86164	0.185535	3.96226	1501	1280	60 × 47	0.63	0.08	38	18	966.5	33.05	0.28	0.02	17.14	0.41	4.34
1522-34-ol52	94.62	0.0214676	48.71	0.0693694	0.179	0.00428133	5.53	0.0183051	1.24	9.191	0.0491729	0.032	0.00304456	29.14	0.0975791	4.63	0.0106925	0.05	0.00544715	0.619	0.0134138	0.019	0.000759439	0.088	0.00117875	0.016	0.0019438	0.007	0.000630337	99.45	100.1	0.106145	3.4581	0.49162	3.63128	1492	1280	50 × 35	0.65	0.04	38	21	1064.1	37.14	0.43	0.02	19.4	0.47	4.6
1522-34-ol53	94.81	0.00573496	48.57	0.06917	0.17	0.00418343	5.41	0.0179079	1.28	9.047	0.0480542	0.032	0.0030023	29.62	0.0991865	4.53	0.0104616	0.057	0.00542693	0.638	0.0134987	0.017	0.00074421	0.0561	0.000992579	0.013	0.00195059	0.009	0.000672232	99.45	100.06	0.1	3.75294	0.33	3.58824	1500	1280	72 × 60	0.61	0.04	38	12	968.7	40.59	0.35	0.03	17.69	0.47	4.19
1522-34-ol54	94.69	0.0114596	49.03	0.0698251	0.165	0.00424765	5.36	0.0179487	1.26	9.07	0.0481764	0.031	0.00303891	29.26	0.097981	4.53	0.0106359	0.055	0.00552255	0.63	0.0135392	0.022	0.000800713	0.0837	0.00115874	0.017	0.00191698	0.012	0.000701836	99.52	100.09	0.133333	3.81818	0.507273	3.45455	1495	1280	70 × 53	0.57	0.04	38	14	981.79	37.5	0.45	0.03	18.51	0.55	4.35
1522-34-ol56	94.68	0.0146698	48.99	0.0697682	0.164	0.00428159	5.52	0.0184172	1.24	9.085	0.0486066	0.027	0.0030212	29.27	0.0991453	4.4	0.0106322	0.043	0.00561987	0.639	0.0137243	0.017	0.000773348	0.063	0.00106538	0.015	0.00194731	0.00948625	0.000653652	99.61	100.2	0.103659	3.89634	0.384146	3.59756	1494	1280	64 × 52	0.59	0.05	38	14	961.1	34.31	0.37	0.02	17.58	0.46	4.19
1522-34-ol58	94.87	0.0149799	48.46	0.0690134	0.174	0.00420964	5.54	0.0181249	1.27	8.962	0.0489826	0.028	0.00301781	29.7	0.0994544	4.52	0.0104385	0.057	0.00538653	0.622	0.0132795	0.018	0.000768838	0.0928	0.00119063	0.015	0.00192122	0.01	0.000684851	99.47	100.11	0.103448	3.57471	0.533333	3.67816	1500	1280	48 × 39	0.64	0.08	38	13	1008.1	35.79	0.37	0.02	17	0.44	4.24
1522-34-ol59	94.31	0.038674	49.16	0.0700103	0.181	0.00448712	5.84	0.0193312	1.17	9.348	0.048454	0.035	0.00321507	28.07	0.0939961	4.84	0.0111775	0.042	0.00578855	0.683	0.0144681	0.02	0.000818414	0.0805	0.00117328	0.017	0.0020789	0.01	0.000755156	99.49	100.09	0.110497	3.77348	0.444751	3.31492	1480	1280	68 × 57	0.6	0.17	38	16	1086.94	36.96	0.44	0.03	20.42	0.54	4.73
1522-34-ol60	94.51	0.0333991	49.17	0.0700245	0.167	0.00436621	5.54	0.0185514	1.23	9.197	0.0482613	0.035	0.00311591	28.71	0.0972443	4.71	0.0109985	0.047	0.00591226	0.632	0.0136633	0.019	0.000780313	0.0678	0.00109518	0.016	0.00201829	0.013	0.000741274	99.54	100.08	0.113772	3.78443	0.405988	3.23353	1489	1280	82 × 82	0.54	0.01	38	19	1004.8	30.24	0.39	0.02	19.13	0.34	4.52
1522-47-ol1	94.6	0.0245053	48.8	0.0694976	0.173	0.00450066	5.38	0.0188439	1.22	9.205	0.0445241	0.039	0.00333153	29.12	0.0915359	4.68	0.0111683	0.092	0.00609588	0.544	0.0132903	0.022	0.000855536	0.1317	0.00145152	0.014	0.00204959	0.007	0.000745784	99.43	100.14	0.127168	3.14451	0.761272	4.10405	1488	1310	39 × 31	0.71	0.08	38	9	999.21	38.77	0.5	0.03	20.27	0.59	4.28
1522-47-ol10	94.44	0.0134066	49.35	0.0702808	0.159	0.0044575	5.4	0.018914	1.26	9.266	0.0418471	0.049	0.00339479	28.75	0.0907402	4.62	0.0112029	0.058	0.00595862	0.603	0.0138879	0.018	0.000827047	0.0704	0.00114714	0.016	0.00206412	0.015	0.000789363	99.64	100.08	0.113208	3.79245	0.442767	2.7673	1491	1310	140 × 116	0.44	0.04	38	26	987.04	26.45	0.4	0.01	18.54	0.25	4.37
1522-47-ol15	94.87	0.0691746	48.81	0.0695118	0.163	0.00429238	5.34	0.0182928	1.31	8.927	0.0453553	0.037	0.00316259	29.77	0.0939595	4.51	0.0107626	0.063	0.0057279	0.554	0.012937	0.015	0.000759051	0.0492	0.000989184	0.013	0.00199784	0.009	0.000694739	99.57	100.06	0.0920245	3.39877	0.30184	3.00613	1504	1310	72 × 55	0.49	0.02	38	21	998.5	33.95	0.35	0.02	17.11	0.43	4.35
1522-47-ol2	94.48	0.0248564	49.23	0.07011	0.17	0.00452803	5.55	0.0192972	1.22	9.203	0.0447506	0.043	0.00337663	28.64	0.090393	4.73	0.0112876	0.087	0.00612278	0.578	0.0137489	0.018	0.000824957	0.0764	0.00119006	0.014	0.00202695	0.013	0.000762338	99.57	100.09	0.105882	3.4	0.449412	3.05882	1487	1310	60 × 55	0.52	0.05	38	17	1031.93	36.53	0.42	0.02	19.52	0.49	4.55
1522-47-ol3	94.46	0.0469187	49.16	0.0700103	0.176	0.00457939	5.59	0.0193643	1.21	9.208	0.0446564	0.039	0.00339113	28.51	0.0910801	4.88	0.0115207	0.081	0.00606786	0.581	0.0137684	0.018	0.000804737	0.0919	0.00126871	0.014	0.00211958	0.011	0.000753307	99.58	100.11	0.102273	3.30114	0.522159	3.01136	1486	1310	50 × 43	0.53	0.12	38	17	1062.46	38.35	0.42	0.02	19.81	0.51	4.71
1522-47-ol6	94.94	0.0106416	48.5	0.0690703	0.171	0.0043251	5.32	0.0182243	1.31	8.926	0.0455795	0.035	0.00312627	30.04	0.0940424	4.48	0.010691	0.085	0.00590624	0.539	0.012836	0.016	0.000750139	0.0753	0.00112848	0.013	0.00191415	0.008	0.000703256	99.51	100.08	0.0935673	3.15205	0.440351	3.33333	1505	1310	48 × 33	0.57	0.17	38	12	975.71	37.27	0.37	0.03	17.93	0.53	4.24
1522-47-ol7	95.03	0.0201318	48.72	0.0693836	0.155	0.00422653	5.21	0.0179145	1.35	8.792	0.0450086	0.034	0.00315387	30.28	0.0955692	4.35	0.0104927	0.068	0.00563355	0.548	0.0128039	0.013	0.000723072	0.0268	0.000821644	0.011	0.00178384	0.009	0.000668488	99.56	100.03	0.083871	3.53548	0.172903	3.03226	1510	1310	66 × 53	0.47	0.04	38	13	931.64	32.89	0.26	0.03	16.45	0.42	4.03
1523B-47-ol1	93.41	0.0115053	50.2	0.0714914	0.186	0.00511891	6.1	0.0217574	1.04	9.87	0.0431819	0.056	0.00398105	25.96	0.0812697	5.19	0.0127848	0.106	0.00709165	0.627	0.015389	0.019	0.000962357	0.0646	0.00122914	0.015	0.00228241	0.015	0.00088885	99.45	100.08	0.102151	3.37097	0.347312	3.3871	1447	1310	112 × 50	0.63	0.18	38	20	1093.97	32.49	0.42	0.02	20.11	0.34	4.87
1523B-47-ol11	93.53	0.00366645	50.1	0.0713489	0.181	0.00499363	5.98	0.0211757	1.07	9.843	0.0448318	0.047	0.00378521	26.36	0.0831969	5.07	0.0124245	0.091	0.00679004	0.63	0.0151153	0.017	0.000909625	0.0409	0.00105805	0.015	0.00219566	0.012	0.00084033	99.45	100.06	0.0939227	3.48066	0.225967	3.37017	1453	1310	64 × 58	0.61	0.12	38	19	1052.16	37.88	0.38	0.03	19.04	0.48	4.75
1523B-47-ol12	93.46	0.00339679	49.93	0.0730287	0.192	0.00517843	6.08	0.0215298	1.03	9.873	0.0438284	0.052	0.00393313	26.02	0.0831254	5.32	0.0128324	0.123	0.00717442	0.631	0.015286	0.017	0.000947275	0.0398	0.00105254	0.02	0.00230664	0.013	0.000882636	99.35	100.06	0.0885417	3.28646	0.207292	3.69792	1446	1310	43 × 38	0.71	0.14	38	15	1121.9	39.38	0.36	0.03	19.97	0.5	5.1
1523B-47-ol14	93.69	0.0335367	49.92	0.0710926	0.177	0.00494404	5.94	0.021034	1.07	9.738	0.0444785	0.05	0.00378249	26.7	0.0835863	5.02	0.0122376	0.097	0.00682547	0.62	0.0150265	0.017	0.000929771	0.0475	0.00108605	0.016	0.00236226	0.008	0.000792766	99.41	100.06	0.0960452	3.50282	0.268362	3.67232	1457	1310	52 × 44	0.65	0.02	38	21	1052.05	38.93	0.34	0.02	19	0.43	4.81
1523B-47-ol15-i1	93.53	0.0301239	50.06	0.071292	0.188	0.00505816	6.04	0.0213881	1.08	9.833	0.0445339	0.048	0.00381936	26.28	0.0829444	5.14	0.0124638	0.103	0.0069312	0.648	0.0153831	0.021	0.000946815	0.0657	0.00122061	0.016	0.0022369	0.015	0.000882295	99.53	100.08	0.111702	3.44681	0.349468	2.92553	1455	1310	62 × 58	0.55	0.01	38	12	1069.93	42.58	0.44	0.03	19.67	0.53	4.79
1523B-47-ol15-i2	93.53	0.0301239	50.06	0.071292	0.188	0.00505816	6.04	0.0213881	1.08	9.833	0.0445339	0.048	0.00381936	26.28	0.0829444	5.14	0.0124638	0.103	0.0069312	0.648	0.0153831	0.021	0.000946815	0.0657	0.00122061	0.016	0.0022369	0.015	0.000882295	99.53	100.08	0.111702	3.44681	0.349468	2.92553	1455	1310		0.55	0.01	38	17	1082.46	40.38	0.43	0.02	19.94	0.51	4.85
1523B-47-ol16	93.63	0.0110458	49.88	0.0710356	0.189	0.00509955	6.02	0.0208539	1.06	9.751	0.0487911	0.054	0.00446416	26.39	0.0832916	5.25	0.0126636	0.108	0.00903444	0.615	0.0144238	0.022	0.000971933	0.0569	0.000827874	0.014	0.00198357	0.016	0.00113413	99.42	100.08	0.116402	3.25397	0.301058	3.49206	1453	1310	48 × 40	0.66	0.08	38	17	1120.94	33.4	0.43	0.02	20.4	0.38	4.95
1523B-47-ol17	93.87	0.0126018	49.78	0.0708932	0.178	0.00486008	5.83	0.0206445	1.09	9.619	0.0444283	0.047	0.00363804	27.1	0.0848386	4.92	0.0120569	0.095	0.00661867	0.636	0.0149166	0.016	0.00090218	0.0445	0.00105171	0.015	0.00219101	0.007	0.000791423	99.39	100.06	0.0898876	3.57303	0.25	3.76404	1462	1310	62 × 48	0.67	0.05	38	19	1038.18	38.21	0.34	0.02	18.69	0.46	4.7
1523B-47-ol18	93.7	0.0225754	49.91	0.0710784	0.182	0.00496451	5.95	0.0210694	1.08	9.734	0.0442101	0.049	0.00376254	26.71	0.0836176	5.01	0.0123414	0.068	0.00675919	0.63	0.0150587	0.02	0.000916807	0.0614	0.00117062	0.016	0.00226023	0.011	0.000839062	99.43	100.07	0.10989	3.46154	0.337363	3.51648	1457	1310	103 × 70	0.64	0.02	38	9	1038.74	37.91	0.41	0.03	19.8	0.48	4.79
1523B-47-ol19	93.75	0.0158404	49.85	0.0709929	0.177	0.00493746	5.89	0.020857	1.1	9.715	0.0433759	0.051	0.00374166	26.85	0.0844004	5.03	0.0121971	0.087	0.00669512	0.616	0.014906	0.019	0.000932252	0.0748	0.00124865	0.014	0.00233406	0.01	0.000810321	99.48	100.08	0.107345	3.48023	0.422599	3.38983	1460	1310	71 × 60	0.6	0.06	38	16	1056.99	39.21	0.41	0.03	20.16	0.48	4.83
1523B-47-ol2	93.34	0.0249214	50.17	0.0898714	0.192	0.00639914	6.12	0.0266866	1.02	9.885	0.0533556	0.056	0.00485522	25.6	0.100769	5.48	0.0161461	0.103	0.00876092	0.656	0.019236	0.019	0.00116555	0.0712	0.00156408	0.015	0.00286048	0.013	0.0010958	99.39	100.08	0.0989583	3.41667	0.370833	3.59375	1442	1310	64 × 57	0.69	0.03	38	20	1147.8	42.01	0.45	0.03	21.5	0.53	5.03
1523B-47-ol23	93.71	0.00918803	49.95	0.0711353	0.176	0.00492548	5.88	0.0208216	1.08	9.726	0.0437994	0.054	0.00371319	26.77	0.084491	4.99	0.0122922	0.089	0.00673191	0.615	0.0148973	0.018	0.000935993	0.0565	0.00113824	0.015	0.00229476	0.01	0.000795752	99.44	100.07	0.102273	3.49432	0.321023	3.57955	1458	1310	72 × 65	0.63	0.04	38	16	1041	39.97	0.37	0.03	18.91	0.47	4.88
1523B-47-ol26	93.69	0.0082848	49.9	0.0710641	0.176	0.00494523	5.87	0.0208617	1.07	9.74	0.043363	0.051	0.00375596	26.67	0.0834924	5.07	0.0122941	0.09	0.00678724	0.632	0.0151874	0.019	0.000941712	0.0648	0.0011983	0.014	0.00237506	0.011	0.000824631	99.37	100.07	0.107955	3.59091	0.368182	3.97727	1455	1310	67 × 59	0.7	0.05	38	20	1072.42	40.75	0.42	0.02	20.02	0.47	4.99
1523B-47-ol28	93.76	0.00394449	49.71	0.0707935	0.18	0.00492847	5.82	0.0207587	1.07	9.74	0.0437378	0.048	0.0037288	26.95	0.0840218	4.94	0.012169	0.12	0.00684487	0.614	0.0149284	0.017	0.000917196	0.0582	0.00115149	0.017	0.002208	0.01	0.000816662	99.29	100.07	0.0944444	3.41111	0.323333	4.33333	1456	1310	56 × 51	0.78	0.08	38	19	1064.59	40.67	0.41	0.03	19.58	0.5	4.71
1523B-47-ol3	93.76	0.00681535	49.68	0.0707508	0.177	0.00493753	5.89	0.020857	1.07	9.741	0.0443672	0.05	0.00379126	26.93	0.0839594	4.97	0.0122429	0.11	0.00689845	0.603	0.0147798	0.02	0.000934205	0.0994	0.00139014	0.015	0.00228125	0.015	0.000880178	99.37	100.11	0.112994	3.40678	0.561582	4.18079	1457	1310	53 × 39	0.74	0.02	38	13	1054.19	39.74	0.46	0.03	20.17	0.56	4.76
1523B-47-ol4	93.68	0.0261666	49.94	0.0711211	0.181	0.00497966	5.93	0.0209986	1.07	9.737	0.0430994	0.056	0.00384154	26.64	0.0830553	5.03	0.0123907	0.097	0.00678802	0.643	0.0152133	0.021	0.00093484	0.0854	0.00132036	0.015	0.00246972	0.012	0.000831334	99.45	100.09	0.116022	3.55249	0.471823	3.53591	1456	1310	66 × 66	0.64	0.08	38	21	1050.09	38.96	0.46	0.03	20.2	0.46	4.78
1523B-47-ol5	93.67	0.00443973	49.94	0.0711211	0.193	0.00505551	6.28	0.0215128	1.13	9.683	0.0424877	0.054	0.00379527	26.33	0.0851291	5.25	0.0125285	0.088	0.00689036	0.69	0.0157676	0.021	0.000932474	0.0631	0.00119185	0.017	0.00230615	0.003	0.000690967	99.75	100.07	0.108808	3.57513	0.326943	1.65803	1466	1310	72 × 55	0.32	0.05	38	10	1111.32	49.12	0.41	0.04	20.7	0.69	4.82
1523B-47-ol9	93.82	0.0105774	49.72	0.0708078	0.176	0.00483592	5.86	0.0206006	1.11	9.705	0.0428336	0.05	0.00364996	27.12	0.0845518	4.91	0.0120324	0.093	0.00664565	0.617	0.0147968	0.019	0.00088109	0.062	0.00116225	0.018	0.00234171	0.012	0.000854648	99.45	100.07	0.107955	3.50568	0.352273	3.52273	1463	1310	100 × 79	0.62	0.02	38	9	1047.71	34.89	0.42	0.02	19.95	0.41	4.69
2216-48-ol10	92.8797	0.00868366	50.36	0.115578	0.2	0.00848553	6.51	0.0438533	0.98	10.124	0.0871645	0.067	0.00493241	24.58	0.190234	5.55	0.0386163	0.184	0.0100485	0.762	0.019209	0.025	0.00165822	0.0848	0.00172461	0.021	0.00326279	0.017	0.0011091	99.45	100.102	0.125	3.81	0.424	3.26	1430	1350	66 × 50	0.652	0.0311709	38	17	1208.53	37.95	0.46	0.03	22.47	0.6	5.31
2216-48-ol3	93.0735	0.00177816	50.15	0.218048	0.194	0.00731567	6.58	0.040201	1	10.003	0.0860831	0.067	0.00448403	24.92	0.150212	5.48	0.0391258	0.201	0.0097112	0.786	0.0271309	0.025	0.00136583	0.0618	0.00213252	0.021	0.00388216	0.017	0.00117708	99.51	100.08	0.128866	4.05155	0.318557	2.93814	1438	1350	52 × 41	0.57	0.01	38	14	1167.32	38.76	0.41	0.03	23.03	0.5	5.31
2216-48-ol8	92.8104	0.00557199	50.53	0.181614	0.2	0.0102243	6.56	0.0395375	0.96	10.141	0.0564087	0.072	0.00655135	24.32	0.112026	5.53	0.0203574	0.184	0.00913009	0.802	0.0232945	0.024	0.00131034	0.0606	0.0019293	0.016	0.00364759	0.02	0.0012259	99.42	100.09	0.12	4.01	0.303	3.35	1426	1350	63 × 60	0.67	0	38	19	1183.16	39.16	0.42	0.03	22.13	0.53	5.35
2217-48-ol17	93.3839	0.0157838	50.1	0.141584	0.179	0.0088628	6.13	0.0414765	1.02	9.887	0.0590043	0.065	0.00497651	25.97	0.131608	5.08	0.0345485	0.184	0.0226685	0.638	0.0396877	0.02	0.00235845	0.0696	0.00219079	0.016	0.00339138	0.018	0.00137819	99.37	100.09	0.111732	3.56425	0.388827	4.02235	1444	1350	60 × 51	0.72	0.02	38	19	1085.57	39.62	0.36	0.02	19.4	0.4	4.84
2217-48-ol18	93.5996	0.0279824	50.05	0.180034	0.173	0.00589457	6.02	0.0310639	1.06	9.749	0.0610102	0.062	0.00921992	26.41	0.094889	5.06	0.0232869	0.164	0.0101842	0.62	0.0210247	0.017	0.00128811	0.0361	0.00145992	0.016	0.0030011	0.016	0.00114827	99.44	100.05	0.0982659	3.58382	0.208671	3.52601	1453	1350	84 × 68	0.61	0.02	38	24	1088.47	34.72	0.34	0.02	19.28	0.4	4.85
2217-48-ol2	93.3806	0.00930981	50.19	0.131636	0.173	0.00809436	6.16	0.0302698	1.03	9.877	0.0662528	0.065	0.00616805	25.98	0.0851424	5.08	0.017128	0.153	0.0106803	0.628	0.0169436	0.02	0.0014086	0.064	0.00153901	0.017	0.0030956	0.017	0.00129079	99.45	100.08	0.115607	3.63006	0.369942	3.64162	1447	1350	93 × 71	0.63	0.06	38	14	1062.96	38.9	0.37	0.03	20.02	0.55	4.82
2217-48-ol21	93.5438	0.00748366	50.06	0.103298	0.178	0.00557224	6.04	0.0424695	1.07	9.837	0.0958336	0.064	0.00658401	26.2	0.162625	5.19	0.0445788	0.182	0.010645	0.608	0.0171613	0.016	0.00135078	0.0308	0.00136681	0.012	0.00552799	0.018	0.00131907	99.51	100.05	0.0898876	3.41573	0.173034	3.03371	1453	1350	69 × 63	0.54	0.06	38	25	1083.15	35.2	0.31	0.02	19.24	0.39	5.03
2217-48-ol28	93.6098	0.021975	49.88	0.0770351	0.18	0.0059742	6.08	0.0262034	1.04	9.767	0.0509178	0.063	0.00432787	26.37	0.176536	5.1	0.0199714	0.16	0.0141012	0.627	0.0306583	0.019	0.00210105	0.0587	0.00235485	0.017	0.00316082	0.019	0.00143387	99.37	100.08	0.105556	3.48333	0.326111	3.94444	1450	1350	65 × 54	0.71	0.01	38	17	1092.16	41.39	0.36	0.02	19.71	0.38	4.91
2217-48-ol32	93.6645	0.0174156	49.78	0.259713	0.175	0.011703	5.93	0.0572321	1.06	9.747	0.102591	0.062	0.00419998	26.75	0.736738	4.99	0.0397804	0.167	0.00764566	0.593	0.0221982	0.019	0.00150037	0.0742	0.00133198	0.013	0.00362926	0.011	0.00229824	99.37	100.08	0.108571	3.38857	0.424	4.05714	1455	1350	56 × 50	0.71	0.05	38	14	1058.82	43.94	0.39	0.02	19.72	0.52	4.8
2217-48-ol33	93.5435	0.0489909	49.98	0.105411	0.177	0.00586948	6.09	0.0296343	1.04	9.861	0.0504838	0.062	0.00530588	26.26	0.136759	5.02	0.0156352	0.163	0.00863786	0.643	0.0226883	0.025	0.0016342	0.1005	0.0026847	0.017	0.00284421	0.015	0.00243991	99.45	100.11	0.141243	3.63277	0.567797	3.72881	1450	1350	86 × 62	0.66	0.02	38	15	1081.47	42.5	0.47	0.04	20.54	0.55	4.76
2217-48-ol35	93.6766	0.00549705	49.88	0.0872642	0.178	0.00796814	5.9	0.0318784	1.08	9.736	0.0603223	0.061	0.00838868	26.74	0.107279	4.99	0.0337895	0.151	0.00921297	0.614	0.0235584	0.02	0.00145861	0.0618	0.00179775	0.014	0.00323889	0.01	0.00101967	99.42	100.07	0.11236	3.44944	0.347191	3.65169	1457	1350	81 × 51	0.65	0.03	38	18	1056.43	30	0.37	0.02	19.64	0.37	4.77
2217-48-ol38	93.5668	0.016309	49.78	0.0960842	0.174	0.00840678	6	0.0262108	1.07	9.835	0.0597829	0.06	0.00445892	26.51	0.112819	5.11	0.0181531	0.179	0.0139196	0.616	0.0219229	0.021	0.00190571	0.0874	0.00188486	0.014	0.00481068	0.017	0.00112587	99.48	100.11	0.12069	3.54023	0.502299	3.62069	1455	1350	61 × 54	0.63	0.04	38	17	1078.96	41.65	0.39	0.02	19.99	0.42	4.75
2217-48-ol41	93.5161	0.015521	50.03	0.113543	0.171	0.00675808	6.01	0.0260791	1.04	9.862	0.0622871	0.059	0.00544299	26.3	0.0890032	5.05	0.0187628	0.151	0.00897877	0.606	0.0240183	0.021	0.0022213	0.0689	0.00135081	0.015	0.00462258	0.016	0.00149572	99.4	100.09	0.122807	3.54386	0.402924	4.03509	1449	1350	82 × 70	0.69	0.02	38	23	1076.8	38.98	0.39	0.02	20.21	0.42	4.78
2217-48-ol45	93.5079	0.0132968	49.91	0.100293	0.178	0.00664926	6.06	0.0252362	1.05	9.859	0.066454	0.066	0.00475312	26.2	0.157832	5.14	0.0474542	0.204	0.0107426	0.64	0.0171432	0.018	0.00233779	0.0568	0.0014094	0.014	0.00285309	0.015	0.00103907	99.41	100.08	0.101124	3.59551	0.319101	3.76404	1450	1350	53 × 44	0.67	0.01	38	19	1088.19	43.2	0.39	0.02	20	0.38	5.01
2217-48-ol70	93.5159	0.0221759	49.91	0.129957	0.175	0.00566596	6.08	0.045437	1.03	9.872	0.0580139	0.058	0.00524828	26.28	0.130692	5.03	0.0373921	0.183	0.00971847	0.63	0.0274645	0.021	0.0014753	0.0771	0.0023906	0.015	0.00321501	0.018	0.00172209	99.38	100.1	0.12	3.6	0.440571	4.11429	1449	1350	52 × 41	0.72	0.02	38	15	1072.86	41.2	0.41	0.02	20.3	0.57	4.82
2217-48-ol75	93.4554	0.0214678	49.99	0.111175	0.176	0.0103052	6.08	0.0318112	1.05	9.855	0.0639165	0.063	0.00614031	26.25	0.124808	5.06	0.0424169	0.192	0.00828438	0.635	0.0288427	0.02	0.00132659	0.0614	0.00159225	0.017	0.00296101	0.018	0.0013601	99.45	100.08	0.113636	3.60795	0.348864	3.57955	1451	1350	39 × 38	0.63	0.06	38	12	1112.15	43.15	0.43	0.02	22.12	0.5	4.91
2218-48-ol17	95.1045	0.0225383	48.49	0.0992051	0.148	0.00471902	5.17	0.0269232	1.37	8.768	0.0503319	0.04	0.00467548	30.56	0.164594	4.29	0.0264698	0.128	0.00836693	0.531	0.0191519	0.016	0.00139449	0.0297	0.00119403	0.012	0.0027655	0.008	0.000850827	99.56	100.03	0.108108	3.58784	0.200676	3.17568	1514	1350	57 × 48	0.47	0.01	38	18	934.98	30.48	0.27	0.02	16.41	0.44	4.04
2216-48-ol17	93	0.0133596	50.19	0.133162	0.195	0.00725754	6.55	0.0323929	1	10.108	0.0506386	0.069	0.00536191	24.88	0.18015	5.46	0.036766	0.205	0.0122043	0.723	0.023148	0.028	0.00134134	0.1259	0.00221328	0.015	0.00360815	0.015	0.00113806	99.56	100.14	0.14359	3.70769	0.645641	2.97436	1435	1350	43 × 37	0.58	0.03	38	11	1202.52	40.77	0.53	0.03	23.91	0.63	5.2
2216-48-ol7	92.89	0.00757421	50.26	0.0715768	0.2	0.00547608	6.39	0.0227918	0.94	10.154	0.0455969	0.074	0.00574856	24.7	0.077007	5.45	0.0134253	0.208	0.0118644	0.706	0.0171652	0.029	0.00156463	0.1334	0.00263933	0.018	0.00233789	0.016	0.00130666	99.29	100.16	0.145	3.53	0.667	4.35	1424	1350	43 × 34	0.87	0.01	38	11	1177.67	44.28	0.53	0.04	23.59	0.7	5.13
2217-48-ol100	93.68	0.0174541	49.84	0.110238	0.175	0.00531568	5.94	0.039468	1.08	9.731	0.0496168	0.059	0.00544023	26.69	0.234779	5.08	0.0353198	0.16	0.00805011	0.595	0.0173697	0.018	0.0016188	0.0614	0.00142752	0.013	0.00298146	0.008	0.000943621	99.45	100.07	0.102857	3.4	0.350857	3.54286	1457	1350	50 × 49	0.62	0.03	38	16	1095.76	39.23	0.34	0.02	20.18	0.4	4.91
2222-48-ol2	95.1	0.00178394	48.51	0.0970745	0.142	0.00584332	5.14	0.0964994	1.35	8.79	0.0771552	0.036	0.00330781	30.78	0.546528	4.14	0.0508448	0.11	0.00648684	0.428	0.0131645	0.015	0.00110262	0.0262	0.000956486	0.013	0.00310674	0.013	0.000953449	99.5	100.04	0.105634	3.01408	0.184507	3.80282	1512	1350	49 × 45	0.54	0.11	38	13	861.06	37.03	0.26	0.02	16.38	0.37	4.05
1521-44-ol5	94.86	0.00372395	49	0.0831558	0.146	0.00509306	5.41	0.0221876	1.35	8.892	0.0544925	0.047	0.00485122	29.79	0.098302	4.29	0.0129429	0.156	0.00919607	0.565	0.0169809	0.017	0.00104601	0.0382	0.00100753	0.015	0.00270533	0.017	0.00102459	99.73	100.06	0.116438	3.86986	0.261644	2.26027	1509	1350	59 × 55	0.33	0.06
1521-45-ol103	94.84	0.00893903	48.46	0.0671481	0.172	0.00419758	5.75	0.018223	1.26	8.966	0.0496954	0.032	0.00322697	29.54	0.0932475	4.7	0.0107942	0.062	0.0060479	0.503	0.0117342	0.016	0.0007971	0.0307	0.000826112	0.013	0.00177861	0.013	0.000782871	99.51	100.04	0.0930233	2.92442	0.178488	3.0814	1500	1300	50 × 42	0.53	0.07	38	11	956.74	36.07	0.26	0.03	18.07	0.52	4.59
1521-45-ol96	94.49	0.0218493	48.82	0.0828503	0.178	0.00533351	6.03	0.0233091	1.19	9.228	0.0606846	0.034	0.00417362	28.55	0.109015	4.82	0.013633	0.063	0.00739693	0.542	0.015164	0.018	0.00107355	0.0424	0.00115339	0.016	0.00224731	0.014	0.000951177	99.55	100.06	0.101124	3.04494	0.238202	2.86517	1487	1300	50 × 35	0.51	0.07	38	7	1016.91	48.51	0.34	0.04	17.9	0.72	4.75
1521-45-ol98	95.08	0.0176786	48.51	0.0672174	0.156	0.00397563	5.32	0.0172004	1.37	8.774	0.0489682	0.031	0.00305535	30.48	0.0954199	4.37	0.0102603	0.061	0.00561754	0.472	0.0111431	0.016	0.000810836	0.0273	0.000768657	0.015	0.00182275	0.014	0.000779917	99.61	100.04	0.102564	3.02564	0.175	2.75641	1514	1300	67 × 56	0.43	0.06	38	26	937.33	32.9	0.3	0.02	16.85	0.39	4.11
1528C-44-ol30	92.95	0.00315074	50.36	0.0854638	0.189	0.00665123	6.57	0.0278741	0.99	10.114	0.0543528	0.067	0.00570322	24.81	0.0818688	5.4	0.0168009	0.162	0.0100086	0.713	0.0195788	0.031	0.00145273	0.1319	0.00205811	0.016	0.00306096	0.021	0.00122215	99.57	100.15	0.164021	3.77249	0.697884	3.06878	1434	1350	78 × 78	0.58	0.08	20	15	1101.73	52.55	0.58	0.05	21.72	0.77	5.08
1528C-45-ol38	92.99	0.005953	50.2	0.0695592	0.198	0.00502265	6.57	0.0215794	0.95	10.149	0.04922	0.046	0.0040551	25.07	0.0765536	5.17	0.0125366	0.081	0.00717194	0.701	0.0152536	0.018	0.0010092	0.0557	0.00115026	0.015	0.00215696	0.013	0.000885322	99.24	100.07	0.0909091	3.5404	0.281313	4.19192	1430	1300	49 × 42	0.83	0.12	38	14	1150.46	45.9	0.34	0.03	19.62	0.7	4.96
2218-48-ol7	94.9541	0.0135527	48.54	0.116915	0.158	0.00854326	5.23	0.0378983	1.37	8.869	0.102776	0.038	0.00345208	30.27	0.223294	4.37	0.0533048	0.138	0.0129058	0.555	0.0174961	0.015	0.00145212	0.0288	0.0011396	0.011	0.00368784	0.015	0.0011785	99.61	100.04	0.0949367	3.51266	0.182278	2.72152	1512	1350	60 × 48	0.43	0.01	38	16	956.66	31.76	0.27	0.02	16.67	0.41	4.28
Unradiogenic Sr group
Intermediate Sr group
Radiogenic Sr group
[truncated: 91 more columns]

## Sheet: Table 6 
Table 6a. T-statistics comparison of means of 87Sr/86 Sr initial of unradiogenic (1) and main (2) inclusions groups.								Table 6b. T-statistics comparison of means of 87Sr/86 Sr initial of main(1) and radiogenic(2) inclusions groups.
Compare Means								Compare Means
Descriptive Statistics								Descriptive Statistics
VAR	N	Mean	Std Dev	Variance	Minimum	Maximum		VAR	N	Mean	Std Dev	Variance	Minimum	Maximum
unradiogenic (1)	14	0.699102	0.000460782	2.1232e-07	0.698165	0.699785		radiogenic (1)	7	0.701844	0.000213497	4.55811e-08	0.70159	0.70214
main (2)	116	0.700629	0.000534787	2.85998e-07	0.69949	0.70189		main (2)	116	0.700629	0.000534787	2.85998e-07	0.69949	0.70189
Means Report								Means Report
VAR	Mean	99.90% LCL	99.90% UCL					VAR	Mean	99.90% LCL	99.90% UCL
unradiogenic (1)	0.699102	0.698583	0.699622					radiogenic (1)	0.701844	0.701364	0.702325
main (2)	0.700629	0.700461	0.700797					main (2)	0.700629	0.700461	0.700797
Mean Difference (1-2)	-0.00152683	0.0010061	0.00204755					Mean Difference (1-2)	0.00121522	0.000794822	0.00163561
t-test assuming unequal variances (heteroscedastic)								t-test assuming unequal variances (heteroscedastic)
Hypothesized Mean Difference	0							Hypothesized Mean Difference	0
Mean Difference	-0.00152683							Mean Difference	0.00121522
Variance (Welch-Satterthwaite)	2.78515e-07							Variance (Welch-Satterthwaite)	2.74076e-07
Test Statistic	11.4987							Test Statistic	12.8258
Degrees of Freedom	18							Degrees of Freedom	11
H1: Mu1 - Mu2 ≠ 0 / Not equal (two-tailed)								H1: Mu1 - Mu2 ≠ 0 / Not equal (two-tailed)
t Critical Value (0.1%)	3.92165	p-value	9.99951e-10	H1 (0.1%)	Accepted			t Critical Value (0.1%)	4.43698	p-value	5.8525e-08	H1 (0.1%)	Accepted
H1: Mu1 - Mu2 < 0 / Less than (lower-tailed)								H1: Mu1 - Mu2 < 0 / Less than (lower-tailed)
t Critical Value (0.1%)	-3.61048	p-value	1	H1 (0.1%)	Rejected			t Critical Value (0.1%)	-4.0247	p-value	1	H1 (0.1%)	Rejected
H1: Mu1 - Mu2 > 0 / Greater than (upper-tailed)								H1: Mu1 - Mu2 > 0 / Greater than (upper-tailed)
t Critical Value (0.1%)	3.61048	p-value	4.99976e-10	H1 (0.1%)	Accepted			t Critical Value (0.1%)	4.0247	p-value	2.92625e-08	H1 (0.1%)	Accepted

## Sheet: Table 7
Table 7. Parameters of geodynamic model. Non-dimensional and dimensional parameters along with the rheological properties for different phase system layers i used in this study (UM = Upper Mantle (dry olivine); PV = Perovskite; PPV = Post- Perovskite) for diffusion (df) and dislocation (ds) creep.
Property	Symbol	Value	Units
Ductile surface yield stress		400	MPa
Ductile yield stress gradient		0.01	-
Brittle friction coefficient		0.1	-
Brittle surface cohesion	c	2	MPa
Surface temperature	Tsurf	300	K
Core-mantle boundary temperature	TCMB	5000	K
Initial potential temperature	TP0	1900	K
Gas constant	R	8.3145	J/K/mol
Surface thermal expansivity		3	K-1
		10-5
Surface thermal conductivity	k	3.5	W/m/K
Olivine phase system
Activation energy-UM (df,ds)	E1	300, 151=530/3.5	kJ/mol
Activation volume-UM (df,ds)	V1	5.00, 4.90=17/3.5	cm3/mol
Pressure scale-UM (df,ds)	P1	,	GPa
Viscosity multiplier-UM		1	-
Activation energy-PV (df,ds)	E2	370, 151=530/3.5	kJ/mol
Activation volume-PV (df,ds)	V2	3.65, 4.90=17/3.5	cm3/mol
Pressure scale-PV (df,ds)	P2	200,	GPa
Viscosity multiplier-PV		10	-
Activation energy-PPV (df,ds)	E3	162, 151=530/3.5	kJ/mol
Activation volume- PPV (df,ds)	V3	1.40, 4.90=17/3.5	cm3/mol
Pressure scale- PPV (df,ds)	P3	1610,	GPa
Viscosity multiplier- PPV		0.1	-
TTG phase system
Activation energy (df,ds)	E1	300, 80=240/3	kJ/mol
Activation volume (df,ds)	V1	5.00, 5.00=15/3	cm3/mol
Pressure scale (df,ds)	P1	,	GPa
Viscosity multiplier		1	-
Activation energy (df,ds)	E2	300, 80=240/3	kJ/mol
Activation volume (df,ds)	V2	5.00, 5.00=15/3	cm3/mol
Pressure scale (df,ds)	P2	,	GPa
Viscosity multiplier		1	-
Activation energy (df,ds)	E3	370, 151=530/3.5	kJ/mol
Activation volume (df,ds)	V3	3.65, 4.90=17/3.5	cm3/mol
Pressure scale (df,ds)	P3	200,	GPa
Viscosity multiplier		1	-

[truncated: 3 more sheets: Table 8, Table 9, Table 10]
